# Supplementary material for: Adoption of improved management practices of livestock: Case of small-scale farmers in rural Bangladesh
Source: PubMed Central journal article supplement (PMC10413065; doi:10.1016/j.heliyon.2023.e18667), 2023-07-25
Supplement: mmc1.pdf [file mmc1.pdf]

Household Number:

## CONTENTS

|                                                                                                                                 |           |
|---------------------------------------------------------------------------------------------------------------------------------|-----------|
| <b>Module B: Household Composition and Education (Male)</b> .....                                                               | <b>1</b>  |
| MODULE B1: HOUSEHOLD COMPOSITION (MALE) .....                                                                                   | 1         |
| MODULE B2: EDUCATION (MALE) .....                                                                                               | 5         |
| <b>Module C: Employment (Male)</b> .....                                                                                        | <b>7</b>  |
| MODULE C1: AGRICULTURE BASED NON-AGRICULTURAL ACTIVITIES: (MALE).....                                                           | 9         |
| MODULE C3: VOCATIONAL TRAINING / TECHNICAL EDUCATION (MALE) .....                                                               | 10        |
| <b>Module D: Own Household Assets (Male)</b> .....                                                                              | <b>12</b> |
| MODULE D1: CURRENT HOUSEHOLD ASSETS (MALE) .....                                                                                | 12        |
| MODULE D2: AGRICULTURAL IMPLEMENTS AND OTHER PRODUCTIVE ASSETS (MALE).....                                                      | 17        |
| <b>Module E: Savings (Male)</b> .....                                                                                           | <b>21</b> |
| <b>Module F: Loans (Male)</b> .....                                                                                             | <b>22</b> |
| <b>Module XXc: Questions on Child Marriage Law (Male and Female)</b> .....                                                      | <b>24</b> |
| <b>Module G: Roster of land and pond/water bodies owned or under operation (Male)</b> .....                                     | <b>26</b> |
| <b>Module H: Agriculture (Male)</b> .....                                                                                       | <b>28</b> |
| MODULE H1: AGRICULTURE PLOT UTILIZATION (MALE).....                                                                             | 28        |
| MODULE H2: IRRIGATION METHOD AND HARVEST (MALE) .....                                                                           | 31        |
| MODULE H3: USAGE OF AGRICULTURAL CHEMICALS, FERTILIZERS AND PESTICIDES (MALE) .....                                             | 32        |
| MODULE H4: RENTAL COST OF TOOLS, MACHINERY AND DRAFT ANIMAL (MALE) .....                                                        | 33        |
| MODULE H5: LABOR USAGE BY GENDER FOR CROP PLANTATION AND HARVESTING (MALE) .....                                                | 34        |
| MODULE H6: POST HARVEST LABOR, ANIMAL AND TOOLS/ MACHINERY USAGE (MALE) .....                                                   | 36        |
| MODULE H7: FERTILIZER, SEED AND PESTICIDES PRICE IN DIFFERENT CROP SEASONS (MALE).....                                          | 38        |
| MODULE H7_A: LABOR COST: FOR SOWING SEED, WEED CONTROL, IRRIGATION AND HARVESTING CROPS. (MALE).....                            | 39        |
| MODULE H8: LOCATION OF PURCHASE/RENT OF ANIMALS, TOOL/MACHINERIES, AGRICULTURAL LABOR, FERTILIZER, PESTICIDES ETC. (MALE) ..... | 39        |
| <b>Module I: Summary of Agriculture Production and Food grain stock (Male)</b> .....                                            | <b>40</b> |
| MODULE I1: SUMMARY OF AGRICULTURE PRODUCTION (CROPS, FRUITS AND VEGETABLES) (MALE) .....                                        | 40        |
| MODULE I2: FOOD GRAIN STOCK AND STORAGE CAPACITY (MALE) .....                                                                   | 41        |
| MODULE I2A: FOOD GRAIN STOCK AND STORAGE CAPACITY (CONTINUED) (MALE) .....                                                      | 42        |
| MODULE I3: NONPLOT FOOD PRODUCTION IN BOTH INSIDE AND OUTSIDE HOMESTEAD (MALE) .....                                            | 43        |
| MODULE I4: SEEDLING/SEEDBED PRODUCTION COST (MALE) .....                                                                        | 44        |
| MODULE HA: AGRICULTURAL TECHNOLOGIES - PADDY RICE (MALE).....                                                                   | 45        |
| MODULE I5: ACCESS TO TECHNOLOGIES (MALE).....                                                                                   | 52        |

Household Number:

|                                                                                                                                 |            |
|---------------------------------------------------------------------------------------------------------------------------------|------------|
| <b>Module J: Agricultural Extension Services and Subsidies (Male)</b> .....                                                     | <b>57</b>  |
| MODULE J1: ACCESS TO AGRICULTURE EXTENSION SERVICES (MALE) .....                                                                | 57         |
| MODULE J1A: ACCESS TO LIVESTOCK AND FISHERIES EXTENSION SERVICES (MALE) .....                                                   | 63         |
| MODULE J2A: GOVERNMENT AGRICULTURE INPUT SUBSIDY CARD RELATED INFORMATION (MALE) .....                                          | 64         |
| <b>Module K: Livestock and Poultry (Male)</b> .....                                                                             | <b>67</b>  |
| MODULE K1: LIVESTOCK AND POULTRY (MALE).....                                                                                    | 67         |
| MODULE ITMP1A: IMPROVED TECHNOLOGY AND MANAGEMENT PRACTICES (ITMP) (MALE) .....                                                 | 70         |
| MODULE ITMP1B: IMPROVED LIVESTOCK HOUSING AND FEEDING MANAGEMENT PRACTICES (MALE).....                                          | 71         |
| MODULE ITMP1B: IMPROVED LIVESTOCK HEALTH MANAGEMENT PRACTICES (MALE).....                                                       | 72         |
| MODULE ITMP1C: IMPROVED PRACTICES OF HANDLING, PRESERVATION, PROCESSING AND STORAGE MEAT, MILK, AND DAIRY PRODUCTS (MALE) ..... | 72         |
| MODULE ITMP1D: PREPARING DIVERSIFIED DAIRY PRODUCTS (MALE) .....                                                                | 74         |
| MODULE K1A: AGRICULTURAL TECHNOLOGIES - DAIRY COWS (MILK) (MALE) .....                                                          | 74         |
| MODULE K2: LIVESTOCK AND POULTRY PRODUCTS (MALE) .....                                                                          | 82         |
| MODULE K3: EXPENDITURE FOR LIVESTOCK AND POULTRY PRODUCTION (MALE) .....                                                        | 83         |
| <b>Module L: Fisheries (Male)</b> .....                                                                                         | <b>84</b>  |
| MODULE L1: FISH/SHRIMP (REPORT FISH CULTIVATION IN PADDY FIELD OR OTHER CROP FIELDS AS WELL) (MALE) .....                       | 84         |
| MODULE L2: FISH/SHRIMP POND PRODUCTION AND INPUTS (MALE).....                                                                   | 85         |
| MODULE ITMP2B: IMPROVED HATCHERY MANAGEMENT TECHNOLOGY (MALE).....                                                              | 86         |
| MODULE ITMP2C: NURSERY TECHNOLOGIES (MALE).....                                                                                 | 88         |
| MODULE ITMP2A: TILAPIA/ SILVER CARP/KATLA AND OTHER VARIETIES OF FISH FARMING TECHNOLOGIES (MALE) .....                         | 92         |
| MODULE L2A: AGRICULTURAL TECHNOLOGIES - FISHPOND AQUACULTURE (MALE) .....                                                       | 95         |
| MODULE L2B: POND AREA OR DIAGRAM (THE WHOLE FARM) (MALE) .....                                                                  | 102        |
| MODULE L2C: POND AREA MEASUREMENT (MALE) .....                                                                                  | 103        |
| <b>Module M: Marketing of Agriculture, Livestock and Fisheries Products (Male)</b> .....                                        | <b>105</b> |
| MODULE M1: MARKETING OF PADDY, RICE, BANANA, MANGO AND POTATO (MALE) .....                                                      | 105        |
| MODULE M2: MARKETING OF LIVESTOCK, JUTE, WHEAT, PULSES, FISH, FRUITS, VEGETABLES, ETC. (MALE).....                              | 106        |
| <b>Module N: Non-agricultural Enterprises (Male)</b> .....                                                                      | <b>108</b> |
| <b>Module XX: Early Marriage (Female)</b> .....                                                                                 | <b>111</b> |
| MODULE XXA: EARLY MARRIAGE (FEMALE).....                                                                                        | 111        |
| MODULE XXB: EARLY MARRIAGE (FEMALE).....                                                                                        | 113        |
| <b>Module O: Food Consumption (Female)</b> .....                                                                                | <b>115</b> |
| MODULE O1: PURCHASES, HOME PRODUCTION AND OTHER SOURCES (FEMALE) .....                                                          | 115        |
| MODULE O2: HOUSEHOLD FOOD INVENTORY ON THE DAY OF SURVEY (FEMALE).....                                                          | 124        |
| MODULE O3: FOOD CONSUMPTION FROM PURCHASES, HOME PRODUCTION AND OTHER SOURCES: RECALL PERIOD 7 DAYS (FEMALE) .....              | 124        |

Household Number:

|                                                                                                                 |            |
|-----------------------------------------------------------------------------------------------------------------|------------|
| <b>Module P: Non-food Expenditure (Male)</b> .....                                                              | <b>125</b> |
| MODULE P1: NON-FOOD EXPENDITURE MONTHLY RECALL (MALE) .....                                                     | 125        |
| MODULE P2: NON-FOOD EXPENDITURE ANNUAL RECALL (MALE).....                                                       | 128        |
| <b>Module Q: Housing (Male)</b> .....                                                                           | <b>136</b> |
| <b>Module R: Sanitation and Water (Male)</b> .....                                                              | <b>140</b> |
| MODULE R2: DOMESTIC ANIMALS AND POULTRY HABITATION AND HYGIENE MANAGEMENT (MALE).....                           | 147        |
| <b>Module S: Access to Facilities (Male)</b> .....                                                              | <b>150</b> |
| <b>Module T: Economic Events/Shocks (Male)</b> .....                                                            | <b>152</b> |
| MODULE T1B: NEGATIVE SHOCKS (MALE).....                                                                         | 152        |
| MODULE T1C: SEVERE DISASTER (MALE) .....                                                                        | 155        |
| MODULE T1C: INSURANCE (MALE) .....                                                                              | 155        |
| MODULE T2: POSITIVE ECONOMIC EVENTS (MALE) .....                                                                | 156        |
| <b>Module U: Participation in Social Safety Net Programs (Male)</b> .....                                       | <b>157</b> |
| MODULE UA: PROGRAM PARTICIPATION IN FOOD FRIENDLY PROGRAM (KHADDO BANDHOB / TK 10/KG RICE PROGRAM) (MALE) ..... | 159        |
| <b>Module V: Migration, Remittances, Transfers and Other Income (Male)</b> .....                                | <b>164</b> |
| MODULE V1: PROFILE OF CURRENT MIGRANTS (DOMESTIC AND INTERNATIONAL) (MALE).....                                 | 164        |
| MODULE V2: REMITTANCE IN (MALE) .....                                                                           | 167        |
| MODULE V3: REMITTANCE OUT (MALE) .....                                                                          | 169        |
| MODULE V4: OTHER INCOME HOUSEHOLD (MALE).....                                                                   | 170        |
| <b>Module W: Anthropometry, Health and Illness (Female)</b> .....                                               | <b>171</b> |
| MODULE W1: ANTHROPOMETRY (FEMALE).....                                                                          | 171        |
| MODULE W2: ANTHROPOMETRY-CHILDREN (FEMALE).....                                                                 | 174        |
| MODULE W3: HEALTH (FEMALE) .....                                                                                | 175        |
| MODULE W4: ILLNESSES (FEMALE).....                                                                              | 176        |
| MODULE W5: ILLNESSES (RECORD FOR THE LAST 4 WEEKS) (FEMALE) .....                                               | 177        |
| MODULE W5A: CHRONIC ILLNESS (FEMALE).....                                                                       | 178        |
| <b>Module X: Household Food Consumption and Food Security (Female)</b> .....                                    | <b>179</b> |
| MODULE X-1.1: HOUSEHOLD FOOD CONSUMPTION (RECALL-1) (FEMALE): .....                                             | 179        |
| MODULE X-2.1: INTRA-HOUSEHOLD FOOD DISTRIBUTION (FEMALE).....                                                   | 180        |
| MODULE X2A: CONSUMPTION OF FOOD PREPARED OUTSIDE (FEMALE).....                                                  | 181        |
| MODULE X3: HOUSEHOLD FOOD HABIT (FEMALE) .....                                                                  | 182        |
| MODULE X4: BAD TIME (KEEPING INCOME IN MIND). RECALL PERIOD: LAST 12 MONTHS (2017): (MALE AND FEMALE).....      | 185        |
| MODULE X5: FOOD SECURITY AND RESILIENCE (FEMALE) .....                                                          | 186        |

Household Number:

|                                                                                                                              |            |
|------------------------------------------------------------------------------------------------------------------------------|------------|
| <b>Module Y: Nutrition Practices and Services (Female)</b> .....                                                             | <b>189</b> |
| MODULE Y1: INFANT AND YOUNG CHILD FEEDING (IYCF) PRACTICES AND USE OF MICRONUTRIENTS (FEMALE) .....                          | 189        |
| MODULE Y2: NUTRITION (IYCF) KNOWLEDGE OF RESPONDENT MOTHERS (FEMALE) .....                                                   | 203        |
| MODULE Y3: AWARENESS-TRIAL-ADOPTION OF SENTINEL PRACTICES (FEMALE) .....                                                     | 207        |
| MODULE Y4: IMMUNIZATION AND HEALTH STATUS OF YOUNG CHILDREN (<2 YEARS) (FEMALE) .....                                        | 209        |
| MODULE Y5: NUTRITION RELATED PRENATAL CARE DURING PREGNANCY WITH YOUNGEST CHILD (FEMALE) .....                               | 216        |
| MODULE Y7: NNP SERVICES USAGE BY CHILDREN UNDER 2 YEARS OF AGE (FEMALE) .....                                                | 222        |
| MODULE Y8: EXPOSURE TO NUTRITION INFORMATION FROM HEALTH WORKERS AND MEDIA (FEMALE) .....                                    | 225        |
| MODULE Y6A: ACCESS TO COMMUNITY CLINICS AND USE OF COMMUNITY CLINIC (FEMALE) .....                                           | 226        |
| <b>Module Z: Women’s Status (Female)</b> .....                                                                               | <b>227</b> |
| MODULE Z1: WORK EARNINGS AND EXPENSES (FEMALE).....                                                                          | 227        |
| MODULE Z2: FREEDOM OF MOBILITY (FEMALE) .....                                                                                | 230        |
| MODULE Z3: REPRODUCTIVE DECISIONS (FEMALE) .....                                                                             | 231        |
| MODULE Z4: DOMESTIC VIOLENCE, ABUSE AND THREATS (FEMALE) .....                                                               | 232        |
| MODULE Z5: WIFE’S ASSETS THAT HAD BEEN BROUGHT TO MARRIAGE (FEMALE) .....                                                    | 235        |
| <b>Module WE: Women’s Empowerment in Agriculture (WEAI) Index (Male and Female)</b> .....                                    | <b>236</b> |
| MODULE WEA: INDIVIDUAL IDENTIFICATION (MALE AND FEMALE) .....                                                                | 236        |
| MODULE WE2: (DIMENSION 1): ROLE IN HOUSEHOLD DECISION-MAKING AROUND PRODUCTION AND INCOME GENERATION (MALE AND FEMALE) ..... | 237        |
| MODULE WE3A: (DIMENSION 2) ACCESS TO PRODUCTIVE CAPITAL (MALE AND FEMALE).....                                               | 238        |
| MODULE WE3B: AGRICULTURAL EXTENSION (MALE AND FEMALE) .....                                                                  | 239        |
| MODULE WE3C: (DIMENSION 3) INCOME (MALE AND FEMALE).....                                                                     | 240        |
| MODULE WE3D: ACCESS TO LOANS (MALE AND FEMALE) .....                                                                         | 242        |
| MODULE WE4: INDIVIDUAL LEADERSHIP AND INFLUENCE IN THE COMMUNITY (MALE AND FEMALE) .....                                     | 243        |
| MODULE WE4 CONTINUED: GROUP MEMBERSHIP (MALE AND FEMALE) .....                                                               | 245        |
| MODULE WE5A: DECISION MAKING (MALE AND FEMALE).....                                                                          | 246        |
| MODULE WE5B: MOTIVATION FOR DECISION-MAKING (MALE AND FEMALE).....                                                           | 247        |
| MODULE WE5C: DECISION MAKING (MALE AND FEMALE) .....                                                                         | 250        |
| MODULE WE6A: TIME ALLOCATION (MALE AND FEMALE).....                                                                          | 251        |
| MODULE WE6B: SATISFACTION WITH TIME ALLOCATION (MALE AND FEMALE).....                                                        | 253        |
| MODULE WE7B: PARENT’S INFORMATION (MALE AND FEMALE) .....                                                                    | 255        |
| MODULE WE7C: PARDA INFORMATION (MALE AND FEMALE) .....                                                                       | 257        |

Household Number:

## DEFINITION OF RESPONDENTS

It is very important to know what is meant to be primary male decision maker and primary female decision maker since in most of the modules they will be the two main respondents.

**Primary male decisionmaker/main male respondent:** The primary male decisionmaker is the male member who makes more social and economic decisions concerning the household, compared to other male members, and is at least 18 years old.

**Primary female decision maker/main female respondent:** The primary female decisionmaker is the female member who makes more social and economic decisions concerning the household, compared to other female members, and is at least 18 years old.

The household members themselves will select their primary male and primary female respondents. Most of the responses will be given by the primary male / primary female respondents, although there are modules where other members of the household will be asked questions as well. In most of those cases, they must be more than 18 years.

## CONSENT OF RESPONDENT

Good morning/afternoon. I am \_\_\_\_\_ from the Data Analysis and Technical Assistance Limited (DATA), a Bangladeshi research organization based in Dhaka. Together with the International Food Policy Research Institute (IFPRI), we are conducting a survey that will provide IFPRI with necessary information to carry out research that is designed to help promote the welfare of Bangladeshis; particularly, to improve food consumption and nutrition of the people and women's status, and to enhance agricultural development and income generation. Your household has been chosen by a random selection process.

We are inviting you to be a participant in this study. We value your opinion and there are no wrong answers to the questions we will be asking in the interview. We will use approximately 6-8 hours of your time to collect all the information. If you prefer, we can do the interview in several visits. In that case, we will fix a time with you or other respondent of your household for the next visit and come accordingly. There will be no cost to you other than your time. There will be no risk as a result of your participating in the study. Your participation in this research is completely voluntary. You are free to withdraw your consent and discontinue participation in this study at any time.

This study is conducted anonymously. You will only be identified through code numbers. Your identity will not be stored with other information we collect about you. Your responses will be assigned a code number, and the list connecting your name with this number will be kept in a locked room and will be destroyed once all the data has been collected and analyzed. Any information we obtain from you during the research will be kept strictly confidential.

Your participation will be highly appreciated. The answers you give will help provide better information to policy-makers, practitioners and program managers so that they can plan for better services that will respond to your needs.

The researcher read to me orally the consent form and explained to me its meaning. I agree to take part in this research. I understand that I am free to discontinue participation at any time if I so choose, and that the investigator will gladly answer any question that arise during the course of the research.

Household Number:

**AS APPLICABLE, CHECK AND SIGN THE CONSENT BOX BELOW**

| SI No. | Modules                                                                                                                                                   | MID of respondent        | Consent of respondent        | Codes                        |
|--------|-----------------------------------------------------------------------------------------------------------------------------------------------------------|--------------------------|------------------------------|------------------------------|
| 1      | FOR THE ADULT RESPONDENTS FOR THE HOUSEHOLD & DWELLING CHARACTERISTICS MODULES<br>[NAME], do you agree to participate in the survey?                      |                          |                              |                              |
|        | NAME .....                                                                                                                                                | <input type="text"/>     | <input type="text"/>         | Respondent agreed yes=1 No=2 |
| 2      | FOR THE RESPONDENTS FOR THE FOOD SECURITY MODULE<br>[NAME], do you agree to participate in the survey?                                                    |                          |                              |                              |
|        | NAME .....                                                                                                                                                | <input type="text"/>     | <input type="text"/>         | Respondent agreed yes=1 No=2 |
| 3      | FOR THE RESPONDENTS FOR THE WOMENS NUTRITION MODULE<br>[NAME], do you agree to participate in the survey?                                                 | <b>MID of respondent</b> | <b>Consent of respondent</b> | <b>Codes</b>                 |
|        | NAME .....                                                                                                                                                | <input type="text"/>     | <input type="text"/>         | Respondent agreed yes=1 No=2 |
|        | NAME .....                                                                                                                                                | <input type="text"/>     | <input type="text"/>         |                              |
|        | NAME .....                                                                                                                                                | <input type="text"/>     | <input type="text"/>         |                              |
|        | NAME .....                                                                                                                                                | <input type="text"/>     | <input type="text"/>         |                              |
|        | NAME .....                                                                                                                                                | <input type="text"/>     | <input type="text"/>         |                              |
| 4      | FOR THE RESPONDENTS FOR PRIMARY CAREGIVERS OF CHILDREN ELIGIBLE FOR THE CHILDREN'S NUTRITION MODULE<br>[NAME], do you agree to participate in the survey? | <b>MID of respondent</b> | <b>Consent of respondent</b> | <b>Codes</b>                 |
|        | NAME .....                                                                                                                                                | <input type="text"/>     | <input type="text"/>         | Respondent agreed yes=1 No=2 |
|        | NAME .....                                                                                                                                                | <input type="text"/>     | <input type="text"/>         |                              |
|        | NAME .....                                                                                                                                                | <input type="text"/>     | <input type="text"/>         |                              |
|        | NAME .....                                                                                                                                                | <input type="text"/>     | <input type="text"/>         |                              |
|        | NAME .....                                                                                                                                                | <input type="text"/>     | <input type="text"/>         |                              |
| 5      | FOR THE FEMALE RESPONDENTS FOR THE EMPOWERMENT IN AGRICULTURE MODULES<br>[NAME], do you agree to participate in the survey?                               | <b>MID of respondent</b> | <b>Consent of respondent</b> | <b>Codes</b>                 |
|        | NAME .....                                                                                                                                                | <input type="text"/>     | <input type="text"/>         | Respondent agreed yes=1 No=2 |
| 6      | FOR THE MALE RESPONDENTS FOR THE EMPOWERMENT IN AGRICULTURE MODULES<br>[NAME], do you agree to participate in the survey?                                 | <b>MID of respondent</b> | <b>Consent of respondent</b> | <b>Codes</b>                 |
|        | NAME .....                                                                                                                                                | <input type="text"/>     | <input type="text"/>         | Respondent agreed yes=1 No=2 |
| 7      | FOR THE RESPONDENTS FOR HOUSEHOLD CONSUMPTION EXPENDITURE MODULE<br>MODULE<br>[NAME], do you agree to participate in the survey?                          | <b>MID of respondent</b> | <b>Consent of respondent</b> | <b>Codes</b>                 |
|        | NAME .....                                                                                                                                                | <input type="text"/>     | <input type="text"/>         | Respondent agreed yes=1 No=2 |

Household Number:

|    |                                                                                                                                |                          |                              |                              |
|----|--------------------------------------------------------------------------------------------------------------------------------|--------------------------|------------------------------|------------------------------|
|    | NAME .....                                                                                                                     | <input type="text"/>     | <input type="text"/>         |                              |
|    | NAME .....                                                                                                                     | <input type="text"/>     | <input type="text"/>         |                              |
|    | NAME .....                                                                                                                     | <input type="text"/>     | <input type="text"/>         |                              |
|    | NAME .....                                                                                                                     | <input type="text"/>     | <input type="text"/>         |                              |
| 8  | <b>FOR THE RESPONDENTS FOR SANITARY NAPKIN USE MODULE</b><br>[NAME], do you agree to participate in the survey?                | <b>MID of respondent</b> | <b>Consent of respondent</b> | <b>Codes</b>                 |
|    | NAME .....                                                                                                                     | <input type="text"/>     | <input type="text"/>         | Respondent agreed yes=1 No=2 |
|    | NAME .....                                                                                                                     | <input type="text"/>     | <input type="text"/>         |                              |
|    | NAME .....                                                                                                                     | <input type="text"/>     | <input type="text"/>         |                              |
|    | NAME .....                                                                                                                     | <input type="text"/>     | <input type="text"/>         |                              |
|    | NAME .....                                                                                                                     | <input type="text"/>     | <input type="text"/>         |                              |
| 9  | <b>FOR THE RESPONDENTS ELIGIBLE FOR THE EARLY MARRIAGE MODULE</b><br>[NAME], do you agree to participate in the survey?        | <b>MID of respondent</b> | <b>Consent of respondent</b> | <b>Codes</b>                 |
|    | NAME .....                                                                                                                     | <input type="text"/>     | <input type="text"/>         | Respondent agreed yes=1 No=2 |
|    | NAME .....                                                                                                                     | <input type="text"/>     | <input type="text"/>         |                              |
|    | NAME .....                                                                                                                     | <input type="text"/>     | <input type="text"/>         |                              |
|    | NAME .....                                                                                                                     | <input type="text"/>     | <input type="text"/>         |                              |
|    | NAME .....                                                                                                                     | <input type="text"/>     | <input type="text"/>         |                              |
| 10 | <b>FOR THE RESPONDENTS ELIGIBLE FOR THE REPRODUCTIVE DECISION MODULE</b><br>[NAME], do you agree to participate in the survey? | <b>MID of respondent</b> | <b>Consent of respondent</b> | <b>Codes</b>                 |
|    | NAME .....                                                                                                                     | <input type="text"/>     | <input type="text"/>         | Respondent agreed yes=1 No=2 |
|    | NAME .....                                                                                                                     | <input type="text"/>     | <input type="text"/>         |                              |
|    | NAME .....                                                                                                                     | <input type="text"/>     | <input type="text"/>         |                              |
|    | NAME .....                                                                                                                     | <input type="text"/>     | <input type="text"/>         |                              |
|    | NAME .....                                                                                                                     | <input type="text"/>     | <input type="text"/>         |                              |
| 11 | <b>FOR THE RESPONDENTS ELIGIBLE FOR THE DOMESTIC VIOLENCE MODULE</b><br>[NAME], do you agree to participate in the survey?     | <b>MID of respondent</b> | <b>Consent of respondent</b> | <b>Codes</b>                 |
|    | NAME .....                                                                                                                     | <input type="text"/>     | <input type="text"/>         | Respondent agreed yes=1 No=2 |
|    | NAME .....                                                                                                                     | <input type="text"/>     | <input type="text"/>         |                              |
|    | NAME .....                                                                                                                     | <input type="text"/>     | <input type="text"/>         |                              |



Household Number:

|            |                      |                      |  |
|------------|----------------------|----------------------|--|
| NAME ..... | <input type="text"/> | <input type="text"/> |  |
| NAME ..... | <input type="text"/> | <input type="text"/> |  |

**Contact Person:**

Name of the Principal Investigator (PI): Dr. Akhter Ahmed

PRSSP/IFPRI

Address: House 10A, Road 35, Gulshan 2, Dhaka 1212

Tel: 989-8686; E-mail of PI: [a.ahmed@cgiar.org](mailto:a.ahmed@cgiar.org)

Agreed to participate  Did not agree

**Statement of the enumerator,**

I am an interviewer of the above mentioned research. I have read the consent form about which the participant is aware of. Being aware of the above mentioned description, the participant has kindly agreed to participate and put a tick mark on the box above.

**Interviewer's signature** \_\_\_\_\_ **Date** \_\_\_\_/\_\_\_\_/\_\_\_\_

Household Number:

## DEFINITION OF HOUSEHOLD

A household is a group of people who live together and take food from the “same pot.” In our survey, a household member is someone who has lived in the household at least 6 months, and at least half of the week in each week in those months.

Even those persons who are not blood relations (such as servants, lodgers, or agricultural laborers) are members of the household if they have stayed in the household at least 3 months of the past 6 months and take food from the “same pot.” If someone stays in the same household but does not bear any costs for food or does not take food from the same pot, they are not considered household members. For example, if two brothers stay in the same house with their families but they do not share food costs and they cook separately, then they are considered two separate households.

Generally, if one person stays more than 3 months out of the last 6 months outside the household, they are not considered household members. We do not include them even if other household members consider them as household members.

Exceptions to these rules should be made for:

Consider as household member

- A newborn child less than 3 months old.
- Someone who has joined the household through marriage less than 3 months ago.
- Servants, lodgers, and agricultural laborers currently in the household and will be staying in the household for a longer period but arrived less than 3 months ago.
- If any household member resides outside the household for the pursuit of education, then that person’s information will have to be recorded in the Household Composition module

Do not consider as household member

- A person who died very recently though stayed more than 3 months in last 6 months.
- Someone who has left the household through marriage less than 3 months ago.
- Servants, lodgers, and agricultural laborers who stayed more than 3 months in last 6 months but left permanently.

This definition of the household is very important. The criteria could be different from other studies you may be familiar with, but you should keep in mind that you should not include those people who do not meet these criteria. Please discuss any questions with your supervisor.







Household Number:

| Code 7: Location of employment                                                                                                                                      | Code 8: Status of the member in the current round                                                                                                                                                                                                                                                                                                                                                                                                                                                                                                                                                                                                                                                                                                                                      | Code 9: Educational Programs                                                                                                                                                                                                                                                                                                                                                                                   | Code 10: Main Source of Earnings                                                                                                                                                                                                                                                                                                                                                                                                                                                                                                                                                                                            |
|---------------------------------------------------------------------------------------------------------------------------------------------------------------------|----------------------------------------------------------------------------------------------------------------------------------------------------------------------------------------------------------------------------------------------------------------------------------------------------------------------------------------------------------------------------------------------------------------------------------------------------------------------------------------------------------------------------------------------------------------------------------------------------------------------------------------------------------------------------------------------------------------------------------------------------------------------------------------|----------------------------------------------------------------------------------------------------------------------------------------------------------------------------------------------------------------------------------------------------------------------------------------------------------------------------------------------------------------------------------------------------------------|-----------------------------------------------------------------------------------------------------------------------------------------------------------------------------------------------------------------------------------------------------------------------------------------------------------------------------------------------------------------------------------------------------------------------------------------------------------------------------------------------------------------------------------------------------------------------------------------------------------------------------|
| This village/ward..... 1<br>Other village/ward in this union..2<br>Other union in this thana .....3<br>Other thana in this district .....4<br>Other district .....5 | Member in both previous and current round ..... 0<br>New food sample and member in current round..... 66<br><br><u><b>Not a member in the previous round but member in the current round</b></u><br>New Member (New Born)..... 1<br>New Member through marriage .....2<br>New Member upon return from divorce or separation.....3<br>Household merged/combined.....4<br>Other reasons (Permanent)..... 5<br><br><u><b>Was a member in the previous round but no longer one in the current round</b></u><br>Residing elsewhere for the pursuit of studies ..... 6<br>Death..... 7<br>Married and left household ..... 8<br>Divorced and left household..... 9<br>Household split ..... 10<br>Left household for employment ..... 11<br>Other reasons for leaving the household ..... 12 | Have not participated in any programs ..... 1<br>Food for Education (FFE) .....2<br>Tk 20 Scholarship.....3<br>Anondo School Scholarship .....4<br>Tk 100 (Tk 125) Scholarship.....5<br>School Feeding Program (Biscuit).....6<br>School Feeding Program (Cooked Food like Khichuri).....7<br>Secondary School Scholarship .....8<br>High School Scholarship .....9<br>Bachelor's/Master's Scholarship .....10 | Physical Labor(agri) ..... 1<br>Physical Labor(non-agri) .....2<br>Salaried Employee .....3<br>Self Employed (Agri) .....4<br>Self Employed (fish farming) .....5<br>Self Employed (fish capture) .....6<br>Self Employed (livestock/poultry) .....7<br>Self Employed (other non-agri) .....8<br>Land rent(cash/share) .....9<br>House Rent.....10<br>Other rent(shop/productive asset) .....11<br>Business(purchase-sell) .....12<br>Business(production) .....13<br>Loan business(use of interest) .....14<br>Remittance (Country) .....15<br>Remittance (Abroad) .....16<br>Others.....17<br>No source of income .....18 |

Household Number:

**Module B2: Education (Male)**

Module start time: Hour   Minu   Respondent ID:  Consent :  yes .... 1  
no ..... 2

Report for all children/member of age 6-25 years or those attending or have attended primary/secondary school/madrasa/university.

| MID | Name | Ever attend school/Madrasa/college/university?<br>Yes...1>>B2_03<br>No....2 | Why did you never attend school/Madrasa/college/university?<br>Next child | When did you first attend school/madrasa/college/university? | Class you were admitted to when first attending school | Type of last school/madrasa/college/university attended | How far is the school/madrasa/college/university from your house?<br>km min |        | Were you enrolled in school in 2017?<br>Yes...1<br>No....2 | Did/do you go to school in 2018?<br>Yes...1<br>No...2><br>> B2_12a | What type of school?<br>Govt....1<br>Private.....2 | Monthly Fees at the school<br>Tk | Does the student receive any private coaching?<br>Yes...1<br>No...2 | If private coaching is availed, what amount is spent on it every month?<br>Tk | Currently in what type of program are you participating?<br>Code 4 | Class attending/ed in 2018<br>Code 2 | Are you repeating the class (in 2017 and 2018)<br>Yes..1No.....2<br>N/A.....9<br>>> next child | Programs participation before 2018<br>Note: report last two programs in case of multiple programs participation<br>Code 4 | Which year did the child stop attending school?<br>*not applicable...9999<br>Year | Why did the child stop attending school?<br>Code 1 |       |
|-----|------|-----------------------------------------------------------------------------|---------------------------------------------------------------------------|--------------------------------------------------------------|--------------------------------------------------------|---------------------------------------------------------|-----------------------------------------------------------------------------|--------|------------------------------------------------------------|--------------------------------------------------------------------|----------------------------------------------------|----------------------------------|---------------------------------------------------------------------|-------------------------------------------------------------------------------|--------------------------------------------------------------------|--------------------------------------|------------------------------------------------------------------------------------------------|---------------------------------------------------------------------------------------------------------------------------|-----------------------------------------------------------------------------------|----------------------------------------------------|-------|
|     |      | Code ↑                                                                      | Code 1                                                                    | Year                                                         | Code 2                                                 | Code 3                                                  | km                                                                          | min    | Code ↑                                                     | Code ↑                                                             | Code ↑                                             | Tk                               | Code ↑                                                              | Tk                                                                            | Code 4                                                             | Code 2                               | Code ↑                                                                                         | Code 4                                                                                                                    | Year                                                                              | Code 1                                             |       |
| MID | Name | B2_01                                                                       | B2_02                                                                     | B2_03                                                        | B2_04                                                  | B2_05                                                   | B2_06a                                                                      | B2_06b | B2_07                                                      | B2_08                                                              | B2_08a                                             | B2_08b                           | B2_08c                                                              | B2_08d                                                                        | B2_09                                                              | B2_10                                | B2_11                                                                                          | B2_12a                                                                                                                    | B2_12b                                                                            | B2_13                                              | B2_14 |
|     |      |                                                                             |                                                                           |                                                              |                                                        |                                                         |                                                                             |        |                                                            |                                                                    |                                                    |                                  |                                                                     |                                                                               |                                                                    |                                      |                                                                                                |                                                                                                                           |                                                                                   |                                                    |       |
|     |      |                                                                             |                                                                           |                                                              |                                                        |                                                         |                                                                             |        |                                                            |                                                                    |                                                    |                                  |                                                                     |                                                                               |                                                                    |                                      |                                                                                                |                                                                                                                           |                                                                                   |                                                    |       |
|     |      |                                                                             |                                                                           |                                                              |                                                        |                                                         |                                                                             |        |                                                            |                                                                    |                                                    |                                  |                                                                     |                                                                               |                                                                    |                                      |                                                                                                |                                                                                                                           |                                                                                   |                                                    |       |
|     |      |                                                                             |                                                                           |                                                              |                                                        |                                                         |                                                                             |        |                                                            |                                                                    |                                                    |                                  |                                                                     |                                                                               |                                                                    |                                      |                                                                                                |                                                                                                                           |                                                                                   |                                                    |       |
|     |      |                                                                             |                                                                           |                                                              |                                                        |                                                         |                                                                             |        |                                                            |                                                                    |                                                    |                                  |                                                                     |                                                                               |                                                                    |                                      |                                                                                                |                                                                                                                           |                                                                                   |                                                    |       |
|     |      |                                                                             |                                                                           |                                                              |                                                        |                                                         |                                                                             |        |                                                            |                                                                    |                                                    |                                  |                                                                     |                                                                               |                                                                    |                                      |                                                                                                |                                                                                                                           |                                                                                   |                                                    |       |
|     |      |                                                                             |                                                                           |                                                              |                                                        |                                                         |                                                                             |        |                                                            |                                                                    |                                                    |                                  |                                                                     |                                                                               |                                                                    |                                      |                                                                                                |                                                                                                                           |                                                                                   |                                                    |       |
|     |      |                                                                             |                                                                           |                                                              |                                                        |                                                         |                                                                             |        |                                                            |                                                                    |                                                    |                                  |                                                                     |                                                                               |                                                                    |                                      |                                                                                                |                                                                                                                           |                                                                                   |                                                    |       |

**Note:** \* Report “9999” (not applicable) in Column B2\_13, if attended school in 2011 (i.e. response in B2\_10 is “2”), then Go to next row for next child.  
Interviewer: Please find the code list for this module B2 in the next page.

Module end time: Hour   Min

Household Number:

**Code list for Module B2:**

| Code 1: Reason not attending/stop attending school<br>(applicable for B2_02 and B2_14)                                                                                                                                                                                                                                                                                                                                                                                                                                                                                                                                                                                                                                                                                                                                                                                                                                                                                                                                                                                                                                                                                                                                                                                                                                        | Code2: Class attended<br>(applicable for B2_04 and B2_10)                                                                                                                                                                                                                                                                                                                                                                                                                                                                                                                                                                                                                                                                                                                                                                                                                                                                                                            | Code 3: Type of school attended/attending                                                                                                                                                                                                                                                                                                                                             | Code 4: Type of program<br>(applicable for B2_09, B2_12a and B2_12b)                                                                                                                                                                                                                                                                                                                                                                                                                                       |
|-------------------------------------------------------------------------------------------------------------------------------------------------------------------------------------------------------------------------------------------------------------------------------------------------------------------------------------------------------------------------------------------------------------------------------------------------------------------------------------------------------------------------------------------------------------------------------------------------------------------------------------------------------------------------------------------------------------------------------------------------------------------------------------------------------------------------------------------------------------------------------------------------------------------------------------------------------------------------------------------------------------------------------------------------------------------------------------------------------------------------------------------------------------------------------------------------------------------------------------------------------------------------------------------------------------------------------|----------------------------------------------------------------------------------------------------------------------------------------------------------------------------------------------------------------------------------------------------------------------------------------------------------------------------------------------------------------------------------------------------------------------------------------------------------------------------------------------------------------------------------------------------------------------------------------------------------------------------------------------------------------------------------------------------------------------------------------------------------------------------------------------------------------------------------------------------------------------------------------------------------------------------------------------------------------------|---------------------------------------------------------------------------------------------------------------------------------------------------------------------------------------------------------------------------------------------------------------------------------------------------------------------------------------------------------------------------------------|------------------------------------------------------------------------------------------------------------------------------------------------------------------------------------------------------------------------------------------------------------------------------------------------------------------------------------------------------------------------------------------------------------------------------------------------------------------------------------------------------------|
| <p><b>Age/sickness/unwillingness perspective:</b><br/> Below school/madrasa age .....1<br/> Sick/disabled child .....2<br/> Child didn't want to attend school.....3<br/> Teachers do not teach well .....4<br/> Parents don't want to send children to school .....5<br/> Examination not passed.....6</p> <p><b>Distance perspective:</b><br/> No school/madrasa nearby .....7<br/> Transport/communication problem .....8</p> <p><b>Non-ability perspective:</b><br/> Inability to bear schooling expenses /inability to buy school uniform .....9<br/> Engaged in household work .....10<br/> Engaged in family business/agriculture .....11<br/> Works elsewhere for income.....12<br/> Does not work now but looking for work.....23</p> <p><b>Stipend perspective:</b><br/> Insufficient amount of stipend money /education allowance .....13<br/> Not getting stipend, so withdrawn from school/madrasa .....14</p> <p><b>Gender perspective:</b><br/> Don't like to send girls to school .....15<br/> There are no female teacher in school .....16<br/> No only boys' or only girls' school .....17<br/> Boys tease girls/don't like girls .....18<br/> Environment of school is not safe .....19<br/> No separate latrine for female students .....20<br/> Due to marriage.....21<br/> Other (specify) .....22</p> | <p>Never attended school .....99<br/> Reads in class I.....0<br/> Completed class I.....1<br/> Completed class II.....2<br/> Completed class III .....3<br/> Completed class IV .....4<br/> Completed class V.....5<br/> Completed class VI .....6<br/> Completed class VII .....7<br/> Completed class VIII.....8<br/> Completed class IX .....9<br/> Completed Secondary School/Dakhil.10<br/> HSC/Alim First Year.....11<br/> HSC/Alim Second Year.....12<br/> BA/BSC/Fazil First Year.....13<br/> BA/BSC/Fazil Second Year .....14<br/> BA/BSC/Fazil Third Year .....15<br/> BA/BSC/Fazil Fourth Year .....16<br/> MA/MSC and above/Kamil.....17<br/> SSC Candidate .....22<br/> HSC Candidate.....33<br/> Preschool class (general) .....66<br/> Preschool (mosque based) .....77<br/> Medical/MBBS .....71<br/> Nursing.....72<br/> Engineer .....73<br/> Diploma Engineer .....74<br/> Vocational/Technical Education.....75<br/> Other (specify) .....76</p> | <p>Govt. aided..... 1<br/> Private(registered)school..... 2<br/> Private(non-registered)school ..... 3</p> <p>Ananda school..... 4<br/> BRAC run NGO school ..... 5<br/> Other NGO run school ..... 6<br/> Aliyah madrasa ..... 7<br/> Quomi madrasa ..... 8<br/> College/university ..... 9<br/> Nurania/hafezia Madrasa ..... 10<br/> Other ..... 11<br/> Kindergarten ..... 12</p> | <p>Not participated/ing in any program ..... 1<br/> Food for education (FFE) ..... 2<br/> Participated in Tk 20 stipend program..... 3<br/> Ananda school stipend program ..... 4<br/> Tk 100 (Tk 125) stipend program..... 5<br/> School feeding program(biscuit) ..... 6<br/> School feeding program(cooked food for example-khichuri/singara) ..... 7<br/> Secondary school student stipend program... 8<br/> Higher secondary stipend program ..... 9<br/> Bachelor's/Master's Scholarship .....10</p> |



Household Number:

**Module C: Employment (Male)**

=> Ask about all members aged 6 years and above.

Module start time:  Hour    Minu

Respondent ID:  Consent :   yes .... 1  
no.....2

Collect information on all type of economic work performed by each HH member in the last 7 days. If any member is involved in more than one economic activity, use one row for each type of economic work.

Recall period: Last 7 days, if not mentioned otherwise.

| MID | Name | What was ___ employment status in the past 7 days?<br>if 1 or 2 >> C05<br>if 3 >> C02<br>if 4 >> C04<br><br>if 5-12 -> next row | Why did ___ not work in the last 7 days?<br>This week .... 1<br>Next week ... 2<br>After 2 weeks.....3<br>Don't know.. 9<br><br>For any of the above response Go to C05 | When will ___ return to work?<br>This week .... 1<br>Next week ... 2<br>After 2 weeks.....3<br>Don't know.. 9<br><br>For any of the above response Go to C05 | How long have you been unemployed / looking for work?<br>< 1 month ..... 1<br>1-<3 months..... 2<br>3-<6 months..... 3<br>6-<9 months..... 4<br>9-<12 months..... 5<br>more than 1 year ..... 6<br>Looking for job for the first time ..... 7<br>Go to next member | Information on economic activities in last 7 days |                 |                                                                         |                                                                      |                                                                                                                                                                              |                                   |                                        |                                                                |                                                                              | Monthly salary OR Average monthly income from this activity? |
|-----|------|---------------------------------------------------------------------------------------------------------------------------------|-------------------------------------------------------------------------------------------------------------------------------------------------------------------------|--------------------------------------------------------------------------------------------------------------------------------------------------------------|--------------------------------------------------------------------------------------------------------------------------------------------------------------------------------------------------------------------------------------------------------------------|---------------------------------------------------|-----------------|-------------------------------------------------------------------------|----------------------------------------------------------------------|------------------------------------------------------------------------------------------------------------------------------------------------------------------------------|-----------------------------------|----------------------------------------|----------------------------------------------------------------|------------------------------------------------------------------------------|--------------------------------------------------------------|
|     |      |                                                                                                                                 |                                                                                                                                                                         |                                                                                                                                                              |                                                                                                                                                                                                                                                                    | Occupation /economic activity in last 7 days      | Activity serial | For ___ (activity) on average for how many days last week did you work? | For ___ (activity) on average for how many hours a day did you work? | What is the nature of the ___ work/ activity performed?<br>Daily/weekly wage..... 1<br>Salary .....2>>C14<br>Self-employed .....3>>C14<br>Work without pay .....4>> next row | What was ___ daily wage / salary? |                                        |                                                                |                                                                              |                                                              |
|     |      |                                                                                                                                 |                                                                                                                                                                         |                                                                                                                                                              |                                                                                                                                                                                                                                                                    |                                                   |                 |                                                                         |                                                                      |                                                                                                                                                                              | Cash                              | Value of meals/ any other pay In-kind. | Have you sold any income received in kind for wages /salaries? | How much money was obtained by selling the "kind" received wages & salaries? |                                                              |
|     |      | [Code 1] ↓                                                                                                                      | [Code-2] ↓                                                                                                                                                              | [Code ] ↑                                                                                                                                                    | [Code ] ↑                                                                                                                                                                                                                                                          | [Code 3] ↓                                        | No.             | [days]                                                                  | [hours]                                                              | [Code ] ↑                                                                                                                                                                    | [Tk]                              | [Tk]                                   |                                                                | [Tk]                                                                         | [Tk]                                                         |
| MID | Name | C01                                                                                                                             | C02                                                                                                                                                                     | C03                                                                                                                                                          | C04                                                                                                                                                                                                                                                                | C05                                               | C06             | C07                                                                     | C08                                                                  | C09                                                                                                                                                                          | C10                               | C11                                    | C12                                                            | C13                                                                          | C14                                                          |
|     |      |                                                                                                                                 |                                                                                                                                                                         |                                                                                                                                                              |                                                                                                                                                                                                                                                                    |                                                   |                 |                                                                         |                                                                      |                                                                                                                                                                              |                                   |                                        |                                                                |                                                                              |                                                              |
|     |      |                                                                                                                                 |                                                                                                                                                                         |                                                                                                                                                              |                                                                                                                                                                                                                                                                    |                                                   |                 |                                                                         |                                                                      |                                                                                                                                                                              |                                   |                                        |                                                                |                                                                              |                                                              |
|     |      |                                                                                                                                 |                                                                                                                                                                         |                                                                                                                                                              |                                                                                                                                                                                                                                                                    |                                                   |                 |                                                                         |                                                                      |                                                                                                                                                                              |                                   |                                        |                                                                |                                                                              |                                                              |
|     |      |                                                                                                                                 |                                                                                                                                                                         |                                                                                                                                                              |                                                                                                                                                                                                                                                                    |                                                   |                 |                                                                         |                                                                      |                                                                                                                                                                              |                                   |                                        |                                                                |                                                                              |                                                              |
|     |      |                                                                                                                                 |                                                                                                                                                                         |                                                                                                                                                              |                                                                                                                                                                                                                                                                    |                                                   |                 |                                                                         |                                                                      |                                                                                                                                                                              |                                   |                                        |                                                                |                                                                              |                                                              |
|     |      |                                                                                                                                 |                                                                                                                                                                         |                                                                                                                                                              |                                                                                                                                                                                                                                                                    |                                                   |                 |                                                                         |                                                                      |                                                                                                                                                                              |                                   |                                        |                                                                |                                                                              |                                                              |
|     |      |                                                                                                                                 |                                                                                                                                                                         |                                                                                                                                                              |                                                                                                                                                                                                                                                                    |                                                   |                 |                                                                         |                                                                      |                                                                                                                                                                              |                                   |                                        |                                                                |                                                                              |                                                              |
|     |      |                                                                                                                                 |                                                                                                                                                                         |                                                                                                                                                              |                                                                                                                                                                                                                                                                    |                                                   |                 |                                                                         |                                                                      |                                                                                                                                                                              |                                   |                                        |                                                                |                                                                              |                                                              |
|     |      |                                                                                                                                 |                                                                                                                                                                         |                                                                                                                                                              |                                                                                                                                                                                                                                                                    |                                                   |                 |                                                                         |                                                                      |                                                                                                                                                                              |                                   |                                        |                                                                |                                                                              |                                                              |
|     |      |                                                                                                                                 |                                                                                                                                                                         |                                                                                                                                                              |                                                                                                                                                                                                                                                                    |                                                   |                 |                                                                         |                                                                      |                                                                                                                                                                              |                                   |                                        |                                                                |                                                                              |                                                              |
|     |      |                                                                                                                                 |                                                                                                                                                                         |                                                                                                                                                              |                                                                                                                                                                                                                                                                    |                                                   |                 |                                                                         |                                                                      |                                                                                                                                                                              |                                   |                                        |                                                                |                                                                              |                                                              |
|     |      |                                                                                                                                 |                                                                                                                                                                         |                                                                                                                                                              |                                                                                                                                                                                                                                                                    |                                                   |                 |                                                                         |                                                                      |                                                                                                                                                                              |                                   |                                        |                                                                |                                                                              |                                                              |
|     |      |                                                                                                                                 |                                                                                                                                                                         |                                                                                                                                                              |                                                                                                                                                                                                                                                                    |                                                   |                 |                                                                         |                                                                      |                                                                                                                                                                              |                                   |                                        |                                                                |                                                                              |                                                              |

Note: Interviewer: Please find the code list for this section in the next page.

Household Number:

## Code list for Module C: Employment

| Code 1: Employment status                                | Code 2: Reasons for not working in the last 7 days | Code 3: Occupation/economic activity       |                                                               |
|----------------------------------------------------------|----------------------------------------------------|--------------------------------------------|---------------------------------------------------------------|
| Worked for pay (salary, wage, self-employed)..... 1      | Sick..... 1                                        | <b>Wage Labor</b>                          | <b>Self-employment (continued)</b>                            |
| Worked without pay (apprentice, family business) ..... 2 | Vacation ..... 2                                   | Agricultural day labor ..... 1             | Herbal doctor/Kabiraj ..... 41                                |
| Did not work but have a job ..... 3                      | Hartal/strike ..... 3                              | Earth work (govt program) ..... 2          | Engineer ..... 42                                             |
| Did not work but looked for a job ..... 4                | Taking care of household matters ..... 4           | Earth work (other)..... 3                  | Lawyer/deed writer/Moktar ..... 43                            |
| <b>Did not work because:</b>                             | Taking care of family members ..... 5              | Sweeper ..... 4                            | Religious leader (Imam/Muazzem/<br>Khadem/Purohit)..... 44    |
| Only studied (student) ..... 5                           | Other (specify)..... 6                             | Scavenger ..... 5                          | Lodging master ..... 45                                       |
| Too young (not student) ..... 6                          |                                                    | Tea garden worker ..... 6                  | Private tutor/house tutor..... 46                             |
| Too old/retired ..... 7                                  |                                                    | Construction labor ..... 7                 | Beggar..... 47                                                |
| Home/household work (includes live-in servant) ..... 8   |                                                    | Factory worker..... 8                      | <b>Trader</b>                                                 |
| Disabled/invalid ..... 9                                 |                                                    | Transport worker (bus/truck helper) .... 9 | Small trader (roadside stand or stall).... 50                 |
| Don't need to..... 10                                    |                                                    | Apprentice ..... 10                        | Medium trader (shop or small store) ... 51                    |
| Other (specify) ..... 11                                 |                                                    | Other wage labor (specify)..... 11         | Large trader                                                  |
|                                                          |                                                    | <b>Salaried worker</b>                     | (large shop or whole sale) ..... 52                           |
|                                                          |                                                    | Government/ parastatal ..... 12            | Fish Trader..... 53                                           |
|                                                          |                                                    | Service (private sector) ..... 13          | Contractor ..... 54                                           |
|                                                          |                                                    | NGO worker ..... 14                        | <b>Production</b>                                             |
|                                                          |                                                    | House maid ..... 15                        | Food Processing ..... 55                                      |
|                                                          |                                                    | Teacher (GoB-Primary school) ..... 16      | Small industry ..... 56                                       |
|                                                          |                                                    | Teacher (Non GoB Primary school)..... 17   | Handicrafts..... 57                                           |
|                                                          |                                                    | Teacher (GoB High school) ..... 18         | <b>Livestock Poultry related work/occupation</b>              |
|                                                          |                                                    | Teacher (Non-GoB High school) ..... 19     | Milk collector..... 58                                        |
|                                                          |                                                    | Teacher (college, university)..... 20      | Livestock Vet medicine seller ..... 59                        |
|                                                          |                                                    | Other salaried worker (specify)..... 21    | Livestock Feed supplier ..... 60                              |
|                                                          |                                                    | <b>Self-employment</b>                     | Commercially feed producer ..... 61                           |
|                                                          |                                                    | Rickshaw/van pulling ..... 22              | Animal Breeder..... 62                                        |
|                                                          |                                                    | Driver of motor vehicle..... 23            | Veterinary/paravet doctor ..... 63                            |
|                                                          |                                                    | Tailor/seamstress ..... 24                 | <b>Farming</b>                                                |
|                                                          |                                                    | Blacksmith..... 25                         | Working own farm (crop) ..... 64                              |
|                                                          |                                                    | Potter ..... 26                            | Share cropper/tenant ..... 65                                 |
|                                                          |                                                    | Cobbler ..... 27                           | Homestead farming..... 66                                     |
|                                                          |                                                    | Hair cutter ..... 28                       | Fisherman (using non owned/not<br>leased water body) ..... 67 |
|                                                          |                                                    | Clothes washer..... 29                     | Raising fish / fish pond ..... 68                             |
|                                                          |                                                    | Porter ..... 30                            | Raising poultry ..... 69                                      |
|                                                          |                                                    | Goldsmith/silversmith..... 31              | Raising livestock..... 70                                     |
|                                                          |                                                    | Repairman (appliances) ..... 32            | Dairy production/ dairy farming ..... 71                      |
|                                                          |                                                    | Mechanic (vehicles) ..... 33               | Other self-employed (specify)..... 72                         |
|                                                          |                                                    | Plumber ..... 34                           |                                                               |
|                                                          |                                                    | Electrician ..... 35                       |                                                               |
|                                                          |                                                    | Carpenter ..... 36                         |                                                               |
|                                                          |                                                    | Mason/Construction Rod Welder..... 37      |                                                               |
|                                                          |                                                    | Doctor ..... 38                            |                                                               |
|                                                          |                                                    | Rural physician ..... 39                   |                                                               |
|                                                          |                                                    | Midwife ..... 40                           |                                                               |

Household Number:

**Module C1: Agriculture based non-agricultural activities: (Male)**

Last 12 months December 1, 2017 to November 30, 2018

C1\_00: In the past 12 months, has anyone from the household worked in the sectors listed below?

Yes...1

No ...2

|                                                                                        |             | How has any of your hh member worked mainly in the mentioned activities in last 12 months<br>Self-employed..... 1<br>Rent out equipment..... 2<br>As labor or salaried employee ..... 3<br>Did not work..... 4<br>>> next activity | 1 <sup>st</sup> Respondent                                        |                                                               |                                                           |                                | 2 <sup>nd</sup> Respondent                                        |                                                               |                                                           |                                | 3 <sup>rd</sup> Respondent                                        |                                                               |                                                           |              |
|----------------------------------------------------------------------------------------|-------------|------------------------------------------------------------------------------------------------------------------------------------------------------------------------------------------------------------------------------------|-------------------------------------------------------------------|---------------------------------------------------------------|-----------------------------------------------------------|--------------------------------|-------------------------------------------------------------------|---------------------------------------------------------------|-----------------------------------------------------------|--------------------------------|-------------------------------------------------------------------|---------------------------------------------------------------|-----------------------------------------------------------|--------------|
|                                                                                        |             |                                                                                                                                                                                                                                    | Which member of the household worked in the sectors listed below? | How many of the past 12 months did you work on this activity? | How many days of the month did you work on this activity? | Total income in last 12 months | Which member of the household worked in the sectors listed below? | How many of the past 12 months did you work on this activity? | How many days of the month did you work on this activity? | Total income in last 12 months | Which member of the household worked in the sectors listed below? | How many of the past 12 months did you work on this activity? | How many days of the month did you work on this activity? | Total income |
| <b>Agricultural Activities in a Non Agricultural Farm</b>                              | <b>Code</b> | <b>Code ↑</b>                                                                                                                                                                                                                      | <b>MID</b>                                                        | <b>Month</b>                                                  | <b>Day</b>                                                | <b>Tk</b>                      | <b>MID</b>                                                        | <b>Month</b>                                                  | <b>Day</b>                                                | <b>Tk</b>                      | <b>MID</b>                                                        | <b>Month</b>                                                  | <b>Day</b>                                                | <b>Tk</b>    |
|                                                                                        |             | <b>C1</b>                                                                                                                                                                                                                          | <b>C2</b>                                                         | <b>C3</b>                                                     | <b>C4</b>                                                 | <b>C5</b>                      | <b>C6</b>                                                         | <b>C7</b>                                                     | <b>C8</b>                                                 | <b>C9</b>                      | <b>C10</b>                                                        | <b>C11</b>                                                    | <b>C12</b>                                                | <b>C13</b>   |
| Rice Mill                                                                              | 1           |                                                                                                                                                                                                                                    |                                                                   |                                                               |                                                           |                                |                                                                   |                                                               |                                                           |                                |                                                                   |                                                               |                                                           |              |
| Wheat/ Maize Mill                                                                      | 2           |                                                                                                                                                                                                                                    |                                                                   |                                                               |                                                           |                                |                                                                   |                                                               |                                                           |                                |                                                                   |                                                               |                                                           |              |
| Spice Processing mill                                                                  | 3           |                                                                                                                                                                                                                                    |                                                                   |                                                               |                                                           |                                |                                                                   |                                                               |                                                           |                                |                                                                   |                                                               |                                                           |              |
| Oil mill /ghaani                                                                       | 4           |                                                                                                                                                                                                                                    |                                                                   |                                                               |                                                           |                                |                                                                   |                                                               |                                                           |                                |                                                                   |                                                               |                                                           |              |
| Sugar mill                                                                             | 5           |                                                                                                                                                                                                                                    |                                                                   |                                                               |                                                           |                                |                                                                   |                                                               |                                                           |                                |                                                                   |                                                               |                                                           |              |
| Food Processing Plant                                                                  | 6           |                                                                                                                                                                                                                                    |                                                                   |                                                               |                                                           |                                |                                                                   |                                                               |                                                           |                                |                                                                   |                                                               |                                                           |              |
| Cold storage                                                                           | 7           |                                                                                                                                                                                                                                    |                                                                   |                                                               |                                                           |                                |                                                                   |                                                               |                                                           |                                |                                                                   |                                                               |                                                           |              |
| Agricultural handling/packaging                                                        | 8           |                                                                                                                                                                                                                                    |                                                                   |                                                               |                                                           |                                |                                                                   |                                                               |                                                           |                                |                                                                   |                                                               |                                                           |              |
| Agricultural marketing                                                                 | 9           |                                                                                                                                                                                                                                    |                                                                   |                                                               |                                                           |                                |                                                                   |                                                               |                                                           |                                |                                                                   |                                                               |                                                           |              |
| Tractor/ Power Tiller Operator                                                         | 10          |                                                                                                                                                                                                                                    |                                                                   |                                                               |                                                           |                                |                                                                   |                                                               |                                                           |                                |                                                                   |                                                               |                                                           |              |
| Irrigation Machinery Operator                                                          | 11          |                                                                                                                                                                                                                                    |                                                                   |                                                               |                                                           |                                |                                                                   |                                                               |                                                           |                                |                                                                   |                                                               |                                                           |              |
| Briquette Urea Applicator                                                              | 12          |                                                                                                                                                                                                                                    |                                                                   |                                                               |                                                           |                                |                                                                   |                                                               |                                                           |                                |                                                                   |                                                               |                                                           |              |
| Sprayer Machine Operator (fertilizer/ pesticide/ insecticide)                          | 13          |                                                                                                                                                                                                                                    |                                                                   |                                                               |                                                           |                                |                                                                   |                                                               |                                                           |                                |                                                                   |                                                               |                                                           |              |
| Seed Sower Machine Operator (Seeder Drills: till, plant and fertilizer simultaneously) | 14          |                                                                                                                                                                                                                                    |                                                                   |                                                               |                                                           |                                |                                                                   |                                                               |                                                           |                                |                                                                   |                                                               |                                                           |              |
| Bed planter                                                                            | 15          |                                                                                                                                                                                                                                    |                                                                   |                                                               |                                                           |                                |                                                                   |                                                               |                                                           |                                |                                                                   |                                                               |                                                           |              |
| Reaper                                                                                 | 16          |                                                                                                                                                                                                                                    |                                                                   |                                                               |                                                           |                                |                                                                   |                                                               |                                                           |                                |                                                                   |                                                               |                                                           |              |
| Thresher                                                                               | 17          |                                                                                                                                                                                                                                    |                                                                   |                                                               |                                                           |                                |                                                                   |                                                               |                                                           |                                |                                                                   |                                                               |                                                           |              |
| Irrigation equipment repair                                                            | 18          |                                                                                                                                                                                                                                    |                                                                   |                                                               |                                                           |                                |                                                                   |                                                               |                                                           |                                |                                                                   |                                                               |                                                           |              |
| Tractor/power tiller repair                                                            | 19          |                                                                                                                                                                                                                                    |                                                                   |                                                               |                                                           |                                |                                                                   |                                                               |                                                           |                                |                                                                   |                                                               |                                                           |              |
| Other non-farm agri equipment repair                                                   | 20          |                                                                                                                                                                                                                                    |                                                                   |                                                               |                                                           |                                |                                                                   |                                                               |                                                           |                                |                                                                   |                                                               |                                                           |              |

Household Number:

|                               |    | How has any of your hh member worked mainly in the mentioned activities in last 12 months<br>Self-employed..... 1<br>Rent out equipment..... 2<br>As labor or salaried employee..... 3<br>Did not work..... 4<br>>> next activity | 1 <sup>st</sup> Respondent                                        |                                                               |                                                           |                                | 2 <sup>nd</sup> Respondent                                        |                                                               |                                                           |                                | 3 <sup>rd</sup> Respondent                                        |                                                               |                                                           |              |
|-------------------------------|----|-----------------------------------------------------------------------------------------------------------------------------------------------------------------------------------------------------------------------------------|-------------------------------------------------------------------|---------------------------------------------------------------|-----------------------------------------------------------|--------------------------------|-------------------------------------------------------------------|---------------------------------------------------------------|-----------------------------------------------------------|--------------------------------|-------------------------------------------------------------------|---------------------------------------------------------------|-----------------------------------------------------------|--------------|
|                               |    |                                                                                                                                                                                                                                   | Which member of the household worked in the sectors listed below? | How many of the past 12 months did you work on this activity? | How many days of the month did you work on this activity? | Total income in last 12 months | Which member of the household worked in the sectors listed below? | How many of the past 12 months did you work on this activity? | How many days of the month did you work on this activity? | Total income in last 12 months | Which member of the household worked in the sectors listed below? | How many of the past 12 months did you work on this activity? | How many days of the month did you work on this activity? | Total income |
| Other non-farm agri activity  | 21 |                                                                                                                                                                                                                                   |                                                                   |                                                               |                                                           |                                |                                                                   |                                                               |                                                           |                                |                                                                   |                                                               |                                                           |              |
| Seed dealer                   | 22 |                                                                                                                                                                                                                                   |                                                                   |                                                               |                                                           |                                |                                                                   |                                                               |                                                           |                                |                                                                   |                                                               |                                                           |              |
| Fertilizer dealer             | 23 |                                                                                                                                                                                                                                   |                                                                   |                                                               |                                                           |                                |                                                                   |                                                               |                                                           |                                |                                                                   |                                                               |                                                           |              |
| Agricultural machinery dealer | 24 |                                                                                                                                                                                                                                   |                                                                   |                                                               |                                                           |                                |                                                                   |                                                               |                                                           |                                |                                                                   |                                                               |                                                           |              |

**Module C3: Vocational Training / Technical Education (Male)**

*To be asked about both males and females who are 10 years old and above*

| MID | Name | Are you receiving/ have received any kind of vocational training/technical education?<br>Yes...1<br>No....2 >><br>Next person | What are you receiving/ have received training on? | From where are you receiving/ have received vocational training/technical education?<br><br>[If response code is 4, then go to C3_09] | If institutional training, how long is the training period? | If institutional training, did you receive any certificate/diploma/degree in vocational training/technical education?<br>Yes...1<br>No...2 > C3_09<br>Training is not yet complete....3 >><br>C3_09 | Is it a certificate course or diploma or Degree course?<br><br>Certificate...1<br>Diploma...2<br>Degree...3 | In comparison with the general education, which grade is your qualification equivalent to? | How much did you spend overall (tuition and other fees) to obtain your certificate/diploma/degree? | What is the main reason why you decided to pursue vocational training/technical education? | Is your current job related to the training that you have acquired/are acquiring?<br><br>Yes...1<br>No....2 >><br>C3_12 | If yes, do you use the skill that you acquired from training in your in your current job?<br><br>Yes...1<br>No...2 | Has your vocational training / technical education helped you to find a suitable job/start your own business?<br><br>Yes...1<br>No....2 |
|-----|------|-------------------------------------------------------------------------------------------------------------------------------|----------------------------------------------------|---------------------------------------------------------------------------------------------------------------------------------------|-------------------------------------------------------------|-----------------------------------------------------------------------------------------------------------------------------------------------------------------------------------------------------|-------------------------------------------------------------------------------------------------------------|--------------------------------------------------------------------------------------------|----------------------------------------------------------------------------------------------------|--------------------------------------------------------------------------------------------|-------------------------------------------------------------------------------------------------------------------------|--------------------------------------------------------------------------------------------------------------------|-----------------------------------------------------------------------------------------------------------------------------------------|
|     |      | Code↑                                                                                                                         | [Code 1]                                           | [Code 2]                                                                                                                              | Months                                                      | Code↑                                                                                                                                                                                               | Code↑                                                                                                       | [Code 3]                                                                                   | [TK]                                                                                               | [Code 4]                                                                                   | Code↑                                                                                                                   | Code↑                                                                                                              | Code↑                                                                                                                                   |
| MID | Name | C3_01                                                                                                                         | C3_02                                              | C3_03                                                                                                                                 | C3_04                                                       | C3_05                                                                                                                                                                                               | C3_06                                                                                                       | C3_07                                                                                      | C3_08                                                                                              | C3_09                                                                                      | C3_10                                                                                                                   | C3_11                                                                                                              | C3_12                                                                                                                                   |
|     |      |                                                                                                                               |                                                    |                                                                                                                                       |                                                             |                                                                                                                                                                                                     |                                                                                                             |                                                                                            |                                                                                                    |                                                                                            |                                                                                                                         |                                                                                                                    |                                                                                                                                         |
|     |      |                                                                                                                               |                                                    |                                                                                                                                       |                                                             |                                                                                                                                                                                                     |                                                                                                             |                                                                                            |                                                                                                    |                                                                                            |                                                                                                                         |                                                                                                                    |                                                                                                                                         |
|     |      |                                                                                                                               |                                                    |                                                                                                                                       |                                                             |                                                                                                                                                                                                     |                                                                                                             |                                                                                            |                                                                                                    |                                                                                            |                                                                                                                         |                                                                                                                    |                                                                                                                                         |
|     |      |                                                                                                                               |                                                    |                                                                                                                                       |                                                             |                                                                                                                                                                                                     |                                                                                                             |                                                                                            |                                                                                                    |                                                                                            |                                                                                                                         |                                                                                                                    |                                                                                                                                         |
|     |      |                                                                                                                               |                                                    |                                                                                                                                       |                                                             |                                                                                                                                                                                                     |                                                                                                             |                                                                                            |                                                                                                    |                                                                                            |                                                                                                                         |                                                                                                                    |                                                                                                                                         |
|     |      |                                                                                                                               |                                                    |                                                                                                                                       |                                                             |                                                                                                                                                                                                     |                                                                                                             |                                                                                            |                                                                                                    |                                                                                            |                                                                                                                         |                                                                                                                    |                                                                                                                                         |
|     |      |                                                                                                                               |                                                    |                                                                                                                                       |                                                             |                                                                                                                                                                                                     |                                                                                                             |                                                                                            |                                                                                                    |                                                                                            |                                                                                                                         |                                                                                                                    |                                                                                                                                         |
|     |      |                                                                                                                               |                                                    |                                                                                                                                       |                                                             |                                                                                                                                                                                                     |                                                                                                             |                                                                                            |                                                                                                    |                                                                                            |                                                                                                                         |                                                                                                                    |                                                                                                                                         |
|     |      |                                                                                                                               |                                                    |                                                                                                                                       |                                                             |                                                                                                                                                                                                     |                                                                                                             |                                                                                            |                                                                                                    |                                                                                            |                                                                                                                         |                                                                                                                    |                                                                                                                                         |

Household Number:

| Code 1                                                     | Code 2                           | Code 3                             | Code 4                                                      |
|------------------------------------------------------------|----------------------------------|------------------------------------|-------------------------------------------------------------|
| Machinery repair/servicing.....1                           | Government institute .....1      | SSC/Dakhil.....10                  | To increase chances of finding a job..... 1                 |
| Agricultural machinery repair/servicing.....2              | NGO.....2                        | HSC/Alim.....12                    | To start own business..... 2                                |
| Electrical/Electronic Repair .....3                        | Other private institution .....3 | BA/BSC pass/Fajil...14.            | To re-enter the workforce after losing previous job ..... 3 |
| Automobile servicing/repair.....4                          | Informal training .....4         | BA/BCS honors/Fajil..15            | To increase income..... 4                                   |
| Textile/Garment/Knitting machine operator.....5            |                                  | MA/MSC and above/Kamil.....16      | To increase efficiency of the current work..... 5           |
| Dress-making/Tailoring/Embroidery/Stitching/Blocking.....6 |                                  | Medical/MBBS.....71                | Other.....96                                                |
| Computer Operator/IT Training.....7                        |                                  | Nursing.....72                     |                                                             |
| Beautification.....8                                       |                                  | Engineering.....73                 |                                                             |
| Leather Craft.....9                                        |                                  | Diploma engineer...74              |                                                             |
| Dying/printing and finishing...10                          |                                  | Others (please mention)...75       |                                                             |
| Glass/Ceramic work...11                                    |                                  | Not equivalent to any class.....96 |                                                             |
| Carpentry.....12                                           |                                  | Do not know.....98                 |                                                             |
| Agriculture.....13                                         |                                  |                                    |                                                             |
| Food processing and preservation...14                      |                                  |                                    |                                                             |
| Food packaging.....15                                      |                                  |                                    |                                                             |
| Fisheries/Fish Culture and Breeding...16                   |                                  |                                    |                                                             |
| Livestock/Poultry rearing or farming...17                  |                                  |                                    |                                                             |
| Nursing/Health Profession...18                             |                                  |                                    |                                                             |
| Welding.....19                                             |                                  |                                    |                                                             |
| Construction work / Masonry.....20                         |                                  |                                    |                                                             |
| Driving...21                                               |                                  |                                    |                                                             |
| Lathe machine operator...22                                |                                  |                                    |                                                             |
| Other..... 23                                              |                                  |                                    |                                                             |

Module End Time:  Hour   Minute

Household Number:

**Module D: Own Household Assets (Male)**  
**Module D1: Current Household Assets (Male)**

Module start time: Hour   Minu

Respondent ID:  Consent :  Yes ...1  
 No....2

| Description of asset  | Asset code | Does your household own the item?<br>Yes...1<br>No....2>>D1_12 | Quantity | What portion of asset owned by household? | ID of owner<br>Report three primary owners<br>If household member, write MID<br>If not household member, then use following codes:<br><br>All members jointly ..... 7<br>1<br>Male outside household ..... 7<br>2<br>Female outside household. .... 7<br>3 |                                                                                                                            |                                                                                                                | How was the asset acquired?<br>(report latest item if quantity >1)<br><br>Purchase .....<br>1<br>Gift .....<br>2<br>Dowry .....<br>3<br>Inheritance .....<br>4<br>Own produced .....<br>5 | Year of purchase / Acquisition<br>(report for latest item) | Purchase value/ price<br>(report total value for all items owned) | Current value/ if asset sold today how much will you receive?<br>(report total value for all items owned) | Type of asset*<br>Consumption only .....<br>1<br>Consumption and Productive .....<br>2<br>Productive only .....<br>3 | N/A for GFSS BASELINE             |                                                                                                                                                                                                                                                               |       |       |         |         |         |
|-----------------------|------------|----------------------------------------------------------------|----------|-------------------------------------------|------------------------------------------------------------------------------------------------------------------------------------------------------------------------------------------------------------------------------------------------------------|----------------------------------------------------------------------------------------------------------------------------|----------------------------------------------------------------------------------------------------------------|-------------------------------------------------------------------------------------------------------------------------------------------------------------------------------------------|------------------------------------------------------------|-------------------------------------------------------------------|-----------------------------------------------------------------------------------------------------------|----------------------------------------------------------------------------------------------------------------------|-----------------------------------|---------------------------------------------------------------------------------------------------------------------------------------------------------------------------------------------------------------------------------------------------------------|-------|-------|---------|---------|---------|
|                       |            |                                                                |          |                                           | Quantit y of asset during midline (2015)<br>If 0>>next row                                                                                                                                                                                                 | How many of the assets listed in midline (2015) were lost after midline survey? (Stolen, burnt, lost, damaged , dead etc.) | How many of the assets listed in midline (2015) were sold after midline (2015) survey ?<br>If 0 go to next row |                                                                                                                                                                                           |                                                            |                                                                   |                                                                                                           |                                                                                                                      | If sold, then what was the price? | Reasons for Selling<br>To meet household's food needs..... 1<br>To meet needs other than food..... 2<br>To meet children's education needs..... 3<br>For treatment ..... 4<br>To purchase assets ..... 5<br>For emergency ..... 6<br>Others (specify) ..... 7 |       |       |         |         |         |
|                       |            |                                                                | No.      | %                                         | MID                                                                                                                                                                                                                                                        |                                                                                                                            |                                                                                                                | Code↑                                                                                                                                                                                     | Year                                                       | (Tk)                                                              | (Tk)                                                                                                      | Code ↑                                                                                                               | No.                               | No.                                                                                                                                                                                                                                                           | No.   | (Tk)  | Code↑   |         |         |
| D1_01                 | D1_02      | D1_03                                                          | D1_04    | D1_05                                     | D1_06a                                                                                                                                                                                                                                                     | D1_06b                                                                                                                     | D1_06c                                                                                                         | D1_07                                                                                                                                                                                     | D1_08                                                      | D1_09                                                             | D1_10                                                                                                     | D1_11                                                                                                                | D1_12                             | D1_13                                                                                                                                                                                                                                                         | D1_14 | D1_15 | D1_16_a | D1_16_b | D1_16_c |
| Trunk /Suitcase       | 1          |                                                                |          |                                           |                                                                                                                                                                                                                                                            |                                                                                                                            |                                                                                                                |                                                                                                                                                                                           |                                                            |                                                                   |                                                                                                           |                                                                                                                      |                                   |                                                                                                                                                                                                                                                               |       |       |         |         |         |
| Buckets / Pots        | 2          |                                                                |          |                                           |                                                                                                                                                                                                                                                            |                                                                                                                            |                                                                                                                |                                                                                                                                                                                           |                                                            |                                                                   |                                                                                                           |                                                                                                                      |                                   |                                                                                                                                                                                                                                                               |       |       |         |         |         |
| Stove / Gas burner    | 3          |                                                                |          |                                           |                                                                                                                                                                                                                                                            |                                                                                                                            |                                                                                                                |                                                                                                                                                                                           |                                                            |                                                                   |                                                                                                           |                                                                                                                      |                                   |                                                                                                                                                                                                                                                               |       |       |         |         |         |
| Metal cooking pots    | 4          |                                                                |          |                                           |                                                                                                                                                                                                                                                            |                                                                                                                            |                                                                                                                |                                                                                                                                                                                           |                                                            |                                                                   |                                                                                                           |                                                                                                                      |                                   |                                                                                                                                                                                                                                                               |       |       |         |         |         |
| Bed / Khat / Chowki   | 5          |                                                                |          |                                           |                                                                                                                                                                                                                                                            |                                                                                                                            |                                                                                                                |                                                                                                                                                                                           |                                                            |                                                                   |                                                                                                           |                                                                                                                      |                                   |                                                                                                                                                                                                                                                               |       |       |         |         |         |
| Armoire/Cabinet/ Alna | 6          |                                                                |          |                                           |                                                                                                                                                                                                                                                            |                                                                                                                            |                                                                                                                |                                                                                                                                                                                           |                                                            |                                                                   |                                                                                                           |                                                                                                                      |                                   |                                                                                                                                                                                                                                                               |       |       |         |         |         |
| Table / chair         | 7          |                                                                |          |                                           |                                                                                                                                                                                                                                                            |                                                                                                                            |                                                                                                                |                                                                                                                                                                                           |                                                            |                                                                   |                                                                                                           |                                                                                                                      |                                   |                                                                                                                                                                                                                                                               |       |       |         |         |         |
| Hukka                 | 8          |                                                                |          |                                           |                                                                                                                                                                                                                                                            |                                                                                                                            |                                                                                                                |                                                                                                                                                                                           |                                                            |                                                                   |                                                                                                           |                                                                                                                      |                                   |                                                                                                                                                                                                                                                               |       |       |         |         |         |
| Electric fan          | 9          |                                                                |          |                                           |                                                                                                                                                                                                                                                            |                                                                                                                            |                                                                                                                |                                                                                                                                                                                           |                                                            |                                                                   |                                                                                                           |                                                                                                                      |                                   |                                                                                                                                                                                                                                                               |       |       |         |         |         |
| Electric iron         | 10         |                                                                |          |                                           |                                                                                                                                                                                                                                                            |                                                                                                                            |                                                                                                                |                                                                                                                                                                                           |                                                            |                                                                   |                                                                                                           |                                                                                                                      |                                   |                                                                                                                                                                                                                                                               |       |       |         |         |         |
| Radio                 | 11         |                                                                |          |                                           |                                                                                                                                                                                                                                                            |                                                                                                                            |                                                                                                                |                                                                                                                                                                                           |                                                            |                                                                   |                                                                                                           |                                                                                                                      |                                   |                                                                                                                                                                                                                                                               |       |       |         |         |         |

Household Number:

| Description of asset     | Asset code | Does your household own the item?<br>Yes...1<br>No...2>>D1_12 | Quantity | What portion of asset owned by household? | ID of owner<br>Report three primary owners<br>If household member, write MID<br>If not household member, then use following codes:<br><br>All members jointly ..... 7<br>1<br>Male outside household ..... 7<br>2<br>Female outside household ..... 7<br>3 |                                                                                                                            |                                                                                                             | How was the asset acquired?<br>(report latest item if quantity >1)<br><br>Purchase .....<br>1<br>Gift .....<br>2<br>Dowry .....<br>3<br>Inheritance .....<br>4<br>Own produced .....<br>5 |                                                                                                                                                                                                                                                               |       |       |        | Year of purchase / Acquisition (report for latest item) | Purchase value/ price (report total value for all items owned) | Current value/ if asset sold today how much will you receive? (report total value for all items owned) | Type of asset*<br>Consumption only .....<br>1<br>Consumption and Productive .....<br>2<br>Productive only .....<br>3 | N/A for GFSS BASELINE |         |         |  |  |
|--------------------------|------------|---------------------------------------------------------------|----------|-------------------------------------------|------------------------------------------------------------------------------------------------------------------------------------------------------------------------------------------------------------------------------------------------------------|----------------------------------------------------------------------------------------------------------------------------|-------------------------------------------------------------------------------------------------------------|-------------------------------------------------------------------------------------------------------------------------------------------------------------------------------------------|---------------------------------------------------------------------------------------------------------------------------------------------------------------------------------------------------------------------------------------------------------------|-------|-------|--------|---------------------------------------------------------|----------------------------------------------------------------|--------------------------------------------------------------------------------------------------------|----------------------------------------------------------------------------------------------------------------------|-----------------------|---------|---------|--|--|
|                          |            |                                                               |          |                                           | Quantit y of asset during midline (2015) If 0>>nex t row                                                                                                                                                                                                   | How many of the assets listed in midline (2015) were lost after midline survey? (Stolen, burnt, lost, damaged , dead etc.) | How many of the assets listed in midline (2015) were sold after midline (2015) survey ? If 0 go to next row | If sold, then what was the price?                                                                                                                                                         | Reasons for Selling<br>To meet household's food needs..... 1<br>To meet needs other than food..... 2<br>To meet children's education needs..... 3<br>For treatment ..... 4<br>To purchase assets ..... 5<br>For emergency ..... 6<br>Others (specify) ..... 7 |       |       |        |                                                         |                                                                |                                                                                                        |                                                                                                                      |                       |         |         |  |  |
|                          |            |                                                               | No.      | %                                         | MID                                                                                                                                                                                                                                                        |                                                                                                                            |                                                                                                             | Code↑                                                                                                                                                                                     | Year                                                                                                                                                                                                                                                          | (Tk)  | (Tk)  | Code ↑ | No.                                                     | No.                                                            | No.                                                                                                    | (Tk)                                                                                                                 | Code↑                 |         |         |  |  |
| D1_01                    | D1_02      | D1_03                                                         | D1_04    | D1_05                                     | D1_06a                                                                                                                                                                                                                                                     | D1_06b                                                                                                                     | D1_06c                                                                                                      | D1_07                                                                                                                                                                                     | D1_08                                                                                                                                                                                                                                                         | D1_09 | D1_10 | D1_11  | D1_12                                                   | D1_13                                                          | D1_14                                                                                                  | D1_15                                                                                                                | D1_16_a               | D1_16_b | D1_16_c |  |  |
| Audio cassette/CD player | 12         |                                                               |          |                                           |                                                                                                                                                                                                                                                            |                                                                                                                            |                                                                                                             |                                                                                                                                                                                           |                                                                                                                                                                                                                                                               |       |       |        |                                                         |                                                                |                                                                                                        |                                                                                                                      |                       |         |         |  |  |
| Wall clock /watch        | 13         |                                                               |          |                                           |                                                                                                                                                                                                                                                            |                                                                                                                            |                                                                                                             |                                                                                                                                                                                           |                                                                                                                                                                                                                                                               |       |       |        |                                                         |                                                                |                                                                                                        |                                                                                                                      |                       |         |         |  |  |
| Wristwatch               | 131        |                                                               |          |                                           |                                                                                                                                                                                                                                                            |                                                                                                                            |                                                                                                             |                                                                                                                                                                                           |                                                                                                                                                                                                                                                               |       |       |        |                                                         |                                                                |                                                                                                        |                                                                                                                      |                       |         |         |  |  |
| Television (B/W)         | 14         |                                                               |          |                                           |                                                                                                                                                                                                                                                            |                                                                                                                            |                                                                                                             |                                                                                                                                                                                           |                                                                                                                                                                                                                                                               |       |       |        |                                                         |                                                                |                                                                                                        |                                                                                                                      |                       |         |         |  |  |
| Television (Color)       | 15         |                                                               |          |                                           |                                                                                                                                                                                                                                                            |                                                                                                                            |                                                                                                             |                                                                                                                                                                                           |                                                                                                                                                                                                                                                               |       |       |        |                                                         |                                                                |                                                                                                        |                                                                                                                      |                       |         |         |  |  |
| Camera/ Video Camera     | 50         |                                                               |          |                                           |                                                                                                                                                                                                                                                            |                                                                                                                            |                                                                                                             |                                                                                                                                                                                           |                                                                                                                                                                                                                                                               |       |       |        |                                                         |                                                                |                                                                                                        |                                                                                                                      |                       |         |         |  |  |
| Jewelry (gold)           | 16         |                                                               |          |                                           |                                                                                                                                                                                                                                                            |                                                                                                                            |                                                                                                             |                                                                                                                                                                                           |                                                                                                                                                                                                                                                               |       |       |        |                                                         |                                                                |                                                                                                        |                                                                                                                      |                       |         |         |  |  |
| Jewelry (silver)         | 161        |                                                               |          |                                           |                                                                                                                                                                                                                                                            |                                                                                                                            |                                                                                                             |                                                                                                                                                                                           |                                                                                                                                                                                                                                                               |       |       |        |                                                         |                                                                |                                                                                                        |                                                                                                                      |                       |         |         |  |  |
| Sewing machine           | 17         |                                                               |          |                                           |                                                                                                                                                                                                                                                            |                                                                                                                            |                                                                                                             |                                                                                                                                                                                           |                                                                                                                                                                                                                                                               |       |       |        |                                                         |                                                                |                                                                                                        |                                                                                                                      |                       |         |         |  |  |
| Bicycle                  | 18         |                                                               |          |                                           |                                                                                                                                                                                                                                                            |                                                                                                                            |                                                                                                             |                                                                                                                                                                                           |                                                                                                                                                                                                                                                               |       |       |        |                                                         |                                                                |                                                                                                        |                                                                                                                      |                       |         |         |  |  |
| Rickshaw                 | 19         |                                                               |          |                                           |                                                                                                                                                                                                                                                            |                                                                                                                            |                                                                                                             |                                                                                                                                                                                           |                                                                                                                                                                                                                                                               |       |       |        |                                                         |                                                                |                                                                                                        |                                                                                                                      |                       |         |         |  |  |
| Van (tricycle van)       | 20         |                                                               |          |                                           |                                                                                                                                                                                                                                                            |                                                                                                                            |                                                                                                             |                                                                                                                                                                                           |                                                                                                                                                                                                                                                               |       |       |        |                                                         |                                                                |                                                                                                        |                                                                                                                      |                       |         |         |  |  |
| Boat                     | 21         |                                                               |          |                                           |                                                                                                                                                                                                                                                            |                                                                                                                            |                                                                                                             |                                                                                                                                                                                           |                                                                                                                                                                                                                                                               |       |       |        |                                                         |                                                                |                                                                                                        |                                                                                                                      |                       |         |         |  |  |

Household Number:

| Description of asset | Asset code | Does your household own the item?<br>Yes...1<br>No...2>>D1_12 | Quantity | What portion of asset owned by household? | ID of owner<br>Report three primary owners<br>If household member, write MID<br>If not household member, then use following codes: |                                                                                                                            |                                                                                                            | How was the asset acquired?<br>(report latest item if quantity >1)<br><br>Purchase<br>.....<br>1 Gift<br>.....<br>2 Dowry<br>.....<br>3 Inheritance<br>.....<br>4 Own produced<br>.....<br>5 | Year of purchase / Acquisition<br>(report for latest item) | Purchase value/ price<br>(report total value for all items owned) | Current value/ if asset sold today how much will you receive?<br>(report total value for all items owned) | Type of asset*<br>Consumption only<br>.....<br>1 Consumption and Productive<br>.....<br>2 Productive only<br>.....<br>3 | N/A for GFSS BASELINE             |                                                                                                                                                                                                                                                               |       |       |         |         |         |
|----------------------|------------|---------------------------------------------------------------|----------|-------------------------------------------|------------------------------------------------------------------------------------------------------------------------------------|----------------------------------------------------------------------------------------------------------------------------|------------------------------------------------------------------------------------------------------------|----------------------------------------------------------------------------------------------------------------------------------------------------------------------------------------------|------------------------------------------------------------|-------------------------------------------------------------------|-----------------------------------------------------------------------------------------------------------|-------------------------------------------------------------------------------------------------------------------------|-----------------------------------|---------------------------------------------------------------------------------------------------------------------------------------------------------------------------------------------------------------------------------------------------------------|-------|-------|---------|---------|---------|
|                      |            |                                                               |          |                                           | Quantit y of asset during midline (2015)<br>If 0>>next row                                                                         | How many of the assets listed in midline (2015) were lost after midline survey? (Stolen, burnt, lost, damaged , dead etc.) | How many of the assets listed in midline (2015) were sold after midline (2015) survey? If 0 go to next row |                                                                                                                                                                                              |                                                            |                                                                   |                                                                                                           |                                                                                                                         | If sold, then what was the price? | Reasons for Selling<br>To meet household's food needs..... 1<br>To meet needs other than food..... 2<br>To meet children's education needs..... 3<br>For treatment ..... 4<br>To purchase assets ..... 5<br>For emergency ..... 6<br>Others (specify) ..... 7 |       |       |         |         |         |
|                      |            |                                                               | No.      | %                                         | MID                                                                                                                                |                                                                                                                            |                                                                                                            | Code↑                                                                                                                                                                                        | Year                                                       | (Tk)                                                              | (Tk)                                                                                                      | Code ↑                                                                                                                  | No.                               | No.                                                                                                                                                                                                                                                           | No.   | (Tk)  | Code↑   |         |         |
| D1_01                | D1_02      | D1_03                                                         | D1_04    | D1_05                                     | D1_06a                                                                                                                             | D1_06b                                                                                                                     | D1_06c                                                                                                     | D1_07                                                                                                                                                                                        | D1_08                                                      | D1_09                                                             | D1_10                                                                                                     | D1_11                                                                                                                   | D1_12                             | D1_13                                                                                                                                                                                                                                                         | D1_14 | D1_15 | D1_16_a | D1_16_b | D1_16_c |
| Engine boat          | 22         |                                                               |          |                                           |                                                                                                                                    |                                                                                                                            |                                                                                                            |                                                                                                                                                                                              |                                                            |                                                                   |                                                                                                           |                                                                                                                         |                                   |                                                                                                                                                                                                                                                               |       |       |         |         |         |
| Motorcycle           | 23         |                                                               |          |                                           |                                                                                                                                    |                                                                                                                            |                                                                                                            |                                                                                                                                                                                              |                                                            |                                                                   |                                                                                                           |                                                                                                                         |                                   |                                                                                                                                                                                                                                                               |       |       |         |         |         |
| Mobile phone set     | 24         |                                                               |          |                                           |                                                                                                                                    |                                                                                                                            |                                                                                                            |                                                                                                                                                                                              |                                                            |                                                                   |                                                                                                           |                                                                                                                         |                                   |                                                                                                                                                                                                                                                               |       |       |         |         |         |
| Land phone set       | 25         |                                                               |          |                                           |                                                                                                                                    |                                                                                                                            |                                                                                                            |                                                                                                                                                                                              |                                                            |                                                                   |                                                                                                           |                                                                                                                         |                                   |                                                                                                                                                                                                                                                               |       |       |         |         |         |
| Dheki                | 26         |                                                               |          |                                           |                                                                                                                                    |                                                                                                                            |                                                                                                            |                                                                                                                                                                                              |                                                            |                                                                   |                                                                                                           |                                                                                                                         |                                   |                                                                                                                                                                                                                                                               |       |       |         |         |         |
| Jata                 | 27         |                                                               |          |                                           |                                                                                                                                    |                                                                                                                            |                                                                                                            |                                                                                                                                                                                              |                                                            |                                                                   |                                                                                                           |                                                                                                                         |                                   |                                                                                                                                                                                                                                                               |       |       |         |         |         |
| Randa                | 28         |                                                               |          |                                           |                                                                                                                                    |                                                                                                                            |                                                                                                            |                                                                                                                                                                                              |                                                            |                                                                   |                                                                                                           |                                                                                                                         |                                   |                                                                                                                                                                                                                                                               |       |       |         |         |         |
| Saw                  | 29         |                                                               |          |                                           |                                                                                                                                    |                                                                                                                            |                                                                                                            |                                                                                                                                                                                              |                                                            |                                                                   |                                                                                                           |                                                                                                                         |                                   |                                                                                                                                                                                                                                                               |       |       |         |         |         |
| Hammer               | 30         |                                                               |          |                                           |                                                                                                                                    |                                                                                                                            |                                                                                                            |                                                                                                                                                                                              |                                                            |                                                                   |                                                                                                           |                                                                                                                         |                                   |                                                                                                                                                                                                                                                               |       |       |         |         |         |
| Patkoa               | 31         |                                                               |          |                                           |                                                                                                                                    |                                                                                                                            |                                                                                                            |                                                                                                                                                                                              |                                                            |                                                                   |                                                                                                           |                                                                                                                         |                                   |                                                                                                                                                                                                                                                               |       |       |         |         |         |
| Fishing net          | 32         |                                                               |          |                                           |                                                                                                                                    |                                                                                                                            |                                                                                                            |                                                                                                                                                                                              |                                                            |                                                                   |                                                                                                           |                                                                                                                         |                                   |                                                                                                                                                                                                                                                               |       |       |         |         |         |
| Spade (Kodal)        | 33         |                                                               |          |                                           |                                                                                                                                    |                                                                                                                            |                                                                                                            |                                                                                                                                                                                              |                                                            |                                                                   |                                                                                                           |                                                                                                                         |                                   |                                                                                                                                                                                                                                                               |       |       |         |         |         |
| Axe (Kural)          | 34         |                                                               |          |                                           |                                                                                                                                    |                                                                                                                            |                                                                                                            |                                                                                                                                                                                              |                                                            |                                                                   |                                                                                                           |                                                                                                                         |                                   |                                                                                                                                                                                                                                                               |       |       |         |         |         |
| Shovel (belcha)      | 35         |                                                               |          |                                           |                                                                                                                                    |                                                                                                                            |                                                                                                            |                                                                                                                                                                                              |                                                            |                                                                   |                                                                                                           |                                                                                                                         |                                   |                                                                                                                                                                                                                                                               |       |       |         |         |         |



Household Number:

| Description of asset   | Asset code   | Does your household own the item?<br>Yes...1<br>No...2>>D1_12 | Quantity     | What portion of asset owned by household? | ID of owner<br>Report three primary owners<br>If household member, write MID<br>If not household member, then use following codes:<br><br>All members jointly ..... 7<br>1<br>Male outside household ..... 7<br>2<br>Female outside household ..... 7<br>3 |                                                                                                                            |                                                                                                             | How was the asset acquired?<br>(report latest item if quantity >1)<br><br>Purchase .....<br>1<br>Gift .....<br>2<br>Dowry .....<br>3<br>Inheritance .....<br>4<br>Own produced .....<br>5 |                                                                                                                                                                                                                                                               |              |              |              | Year of purchase / Acquisition (report for latest item) | Purchase value/ price (report total value for all items owned) | Current value/ if asset sold today how much will you receive? (report total value for all items owned) | Type of asset*<br>Consumption only .....<br>1<br>Consumption and Productive .....<br>2<br>Productive only .....<br>3 | N/A for GFSS BASELINE |                |                |  |  |
|------------------------|--------------|---------------------------------------------------------------|--------------|-------------------------------------------|------------------------------------------------------------------------------------------------------------------------------------------------------------------------------------------------------------------------------------------------------------|----------------------------------------------------------------------------------------------------------------------------|-------------------------------------------------------------------------------------------------------------|-------------------------------------------------------------------------------------------------------------------------------------------------------------------------------------------|---------------------------------------------------------------------------------------------------------------------------------------------------------------------------------------------------------------------------------------------------------------|--------------|--------------|--------------|---------------------------------------------------------|----------------------------------------------------------------|--------------------------------------------------------------------------------------------------------|----------------------------------------------------------------------------------------------------------------------|-----------------------|----------------|----------------|--|--|
|                        |              |                                                               |              |                                           | Quantit y of asset during midline (2015) If 0>>next row                                                                                                                                                                                                    | How many of the assets listed in midline (2015) were lost after midline survey? (Stolen, burnt, lost, damaged , dead etc.) | How many of the assets listed in midline (2015) were sold after midline (2015) survey ? If 0 go to next row | If sold, then what was the price?                                                                                                                                                         | Reasons for Selling<br>To meet household's food needs..... 1<br>To meet needs other than food..... 2<br>To meet children's education needs..... 3<br>For treatment ..... 4<br>To purchase assets ..... 5<br>For emergency ..... 6<br>Others (specify) ..... 7 |              |              |              |                                                         |                                                                |                                                                                                        |                                                                                                                      |                       |                |                |  |  |
|                        |              |                                                               | No.          | %                                         | MID                                                                                                                                                                                                                                                        |                                                                                                                            |                                                                                                             | Code↑                                                                                                                                                                                     | Year                                                                                                                                                                                                                                                          | (Tk)         | (Tk)         | Code ↑       | No.                                                     | No.                                                            | No.                                                                                                    | (Tk)                                                                                                                 | Code↑                 |                |                |  |  |
| <b>D1_01</b>           | <b>D1_02</b> | <b>D1_03</b>                                                  | <b>D1_04</b> | <b>D1_05</b>                              | <b>D1_06a</b>                                                                                                                                                                                                                                              | <b>D1_06b</b>                                                                                                              | <b>D1_06c</b>                                                                                               | <b>D1_07</b>                                                                                                                                                                              | <b>D1_08</b>                                                                                                                                                                                                                                                  | <b>D1_09</b> | <b>D1_10</b> | <b>D1_11</b> | <b>D1_12</b>                                            | <b>D1_13</b>                                                   | <b>D1_14</b>                                                                                           | <b>D1_15</b>                                                                                                         | <b>D1_16_a</b>        | <b>D1_16_b</b> | <b>D1_16_c</b> |  |  |
| Shabol                 | 36           |                                                               |              |                                           |                                                                                                                                                                                                                                                            |                                                                                                                            |                                                                                                             |                                                                                                                                                                                           |                                                                                                                                                                                                                                                               |              |              |              |                                                         |                                                                |                                                                                                        |                                                                                                                      |                       |                |                |  |  |
| Daa                    | 37           |                                                               |              |                                           |                                                                                                                                                                                                                                                            |                                                                                                                            |                                                                                                             |                                                                                                                                                                                           |                                                                                                                                                                                                                                                               |              |              |              |                                                         |                                                                |                                                                                                        |                                                                                                                      |                       |                |                |  |  |
| Horse                  | 38           |                                                               |              |                                           |                                                                                                                                                                                                                                                            |                                                                                                                            |                                                                                                             |                                                                                                                                                                                           |                                                                                                                                                                                                                                                               |              |              |              |                                                         |                                                                |                                                                                                        |                                                                                                                      |                       |                |                |  |  |
| Mule                   | 39           |                                                               |              |                                           |                                                                                                                                                                                                                                                            |                                                                                                                            |                                                                                                             |                                                                                                                                                                                           |                                                                                                                                                                                                                                                               |              |              |              |                                                         |                                                                |                                                                                                        |                                                                                                                      |                       |                |                |  |  |
| Donkey                 | 40           |                                                               |              |                                           |                                                                                                                                                                                                                                                            |                                                                                                                            |                                                                                                             |                                                                                                                                                                                           |                                                                                                                                                                                                                                                               |              |              |              |                                                         |                                                                |                                                                                                        |                                                                                                                      |                       |                |                |  |  |
| Cow                    | 401          |                                                               |              |                                           |                                                                                                                                                                                                                                                            |                                                                                                                            |                                                                                                             |                                                                                                                                                                                           |                                                                                                                                                                                                                                                               |              |              |              |                                                         |                                                                |                                                                                                        |                                                                                                                      |                       |                |                |  |  |
| Goat/ Sheep            | 402          |                                                               |              |                                           |                                                                                                                                                                                                                                                            |                                                                                                                            |                                                                                                             |                                                                                                                                                                                           |                                                                                                                                                                                                                                                               |              |              |              |                                                         |                                                                |                                                                                                        |                                                                                                                      |                       |                |                |  |  |
| Duck/ Hen              | 403          |                                                               |              |                                           |                                                                                                                                                                                                                                                            |                                                                                                                            |                                                                                                             |                                                                                                                                                                                           |                                                                                                                                                                                                                                                               |              |              |              |                                                         |                                                                |                                                                                                        |                                                                                                                      |                       |                |                |  |  |
| Other Animal (specify) | 41           |                                                               |              |                                           |                                                                                                                                                                                                                                                            |                                                                                                                            |                                                                                                             |                                                                                                                                                                                           |                                                                                                                                                                                                                                                               |              |              |              |                                                         |                                                                |                                                                                                        |                                                                                                                      |                       |                |                |  |  |
| Cash in hand           | 42           |                                                               |              |                                           |                                                                                                                                                                                                                                                            |                                                                                                                            |                                                                                                             |                                                                                                                                                                                           |                                                                                                                                                                                                                                                               |              |              |              |                                                         |                                                                |                                                                                                        |                                                                                                                      |                       |                |                |  |  |
| Solar energy panel     | 43           |                                                               |              |                                           |                                                                                                                                                                                                                                                            |                                                                                                                            |                                                                                                             |                                                                                                                                                                                           |                                                                                                                                                                                                                                                               |              |              |              |                                                         |                                                                |                                                                                                        |                                                                                                                      |                       |                |                |  |  |
| Electricity Generator  | 44           |                                                               |              |                                           |                                                                                                                                                                                                                                                            |                                                                                                                            |                                                                                                             |                                                                                                                                                                                           |                                                                                                                                                                                                                                                               |              |              |              |                                                         |                                                                |                                                                                                        |                                                                                                                      |                       |                |                |  |  |
| IPS                    | 45           |                                                               |              |                                           |                                                                                                                                                                                                                                                            |                                                                                                                            |                                                                                                             |                                                                                                                                                                                           |                                                                                                                                                                                                                                                               |              |              |              |                                                         |                                                                |                                                                                                        |                                                                                                                      |                       |                |                |  |  |
| Computer/ Laptop       | 46           |                                                               |              |                                           |                                                                                                                                                                                                                                                            |                                                                                                                            |                                                                                                             |                                                                                                                                                                                           |                                                                                                                                                                                                                                                               |              |              |              |                                                         |                                                                |                                                                                                        |                                                                                                                      |                       |                |                |  |  |

Household Number:

| Description of asset     | Asset code | Does your household own the item?<br>Yes...1<br>No...2>>D1_12 | Quantity | What portion of asset owned by household? | ID of owner<br>Report three primary owners<br>If household member, write MID<br>If not household member, then use following codes:<br><br>All members jointly ..... 7<br>1<br>Male outside household ..... 7<br>2<br>Female outside household. .... 7<br>3 |                                                                                                                            |                                                                                                             | How was the asset acquired? (report latest item if quantity >1)<br><br>Purchase .....<br>1<br>Gift .....<br>2<br>Dowry .....<br>3<br>Inheritance .....<br>4<br>Own produced .....<br>5 |                                                                                                                                                                                                                                                               |       |       |        | Year of purchase / Acquisition (report for latest item) | Purchase value/ price (report total value for all items owned) | Current value/ if asset sold today how much will you receive? (report total value for all items owned) | Type of asset*<br>Consumption only .....<br>1<br>Consumption and Productive .....<br>2<br>Productive only .....<br>3 | N/A for GFSS BASELINE |         |         |  |  |
|--------------------------|------------|---------------------------------------------------------------|----------|-------------------------------------------|------------------------------------------------------------------------------------------------------------------------------------------------------------------------------------------------------------------------------------------------------------|----------------------------------------------------------------------------------------------------------------------------|-------------------------------------------------------------------------------------------------------------|----------------------------------------------------------------------------------------------------------------------------------------------------------------------------------------|---------------------------------------------------------------------------------------------------------------------------------------------------------------------------------------------------------------------------------------------------------------|-------|-------|--------|---------------------------------------------------------|----------------------------------------------------------------|--------------------------------------------------------------------------------------------------------|----------------------------------------------------------------------------------------------------------------------|-----------------------|---------|---------|--|--|
|                          |            |                                                               |          |                                           | Quantit y of asset during midline (2015) If 0>>next row                                                                                                                                                                                                    | How many of the assets listed in midline (2015) were lost after midline survey? (Stolen, burnt, lost, damaged , dead etc.) | How many of the assets listed in midline (2015) were sold after midline (2015) survey ? If 0 go to next row | If sold, then what was the price?                                                                                                                                                      | Reasons for Selling<br>To meet household's food needs..... 1<br>To meet needs other than food..... 2<br>To meet children's education needs..... 3<br>For treatment ..... 4<br>To purchase assets ..... 5<br>For emergency ..... 6<br>Others (specify) ..... 7 |       |       |        |                                                         |                                                                |                                                                                                        |                                                                                                                      |                       |         |         |  |  |
|                          |            |                                                               | No.      | %                                         | MID                                                                                                                                                                                                                                                        |                                                                                                                            |                                                                                                             | Code↑                                                                                                                                                                                  | Year                                                                                                                                                                                                                                                          | (Tk)  | (Tk)  | Code ↑ | No.                                                     | No.                                                            | No.                                                                                                    | (Tk)                                                                                                                 | Code↑                 |         |         |  |  |
| D1_01                    | D1_02      | D1_03                                                         | D1_04    | D1_05                                     | D1_06a                                                                                                                                                                                                                                                     | D1_06b                                                                                                                     | D1_06c                                                                                                      | D1_07                                                                                                                                                                                  | D1_08                                                                                                                                                                                                                                                         | D1_09 | D1_10 | D1_11  | D1_12                                                   | D1_13                                                          | D1_14                                                                                                  | D1_15                                                                                                                | D1_16_a               | D1_16_b | D1_16_c |  |  |
| Flash Drive/ Memory Card | 47         |                                                               |          |                                           |                                                                                                                                                                                                                                                            |                                                                                                                            |                                                                                                             |                                                                                                                                                                                        |                                                                                                                                                                                                                                                               |       |       |        |                                                         |                                                                |                                                                                                        |                                                                                                                      |                       |         |         |  |  |
| Printer                  | 48         |                                                               |          |                                           |                                                                                                                                                                                                                                                            |                                                                                                                            |                                                                                                             |                                                                                                                                                                                        |                                                                                                                                                                                                                                                               |       |       |        |                                                         |                                                                |                                                                                                        |                                                                                                                      |                       |         |         |  |  |
| Tab                      | 49         |                                                               |          |                                           |                                                                                                                                                                                                                                                            |                                                                                                                            |                                                                                                             |                                                                                                                                                                                        |                                                                                                                                                                                                                                                               |       |       |        |                                                         |                                                                |                                                                                                        |                                                                                                                      |                       |         |         |  |  |
| Other1<br>[_____]        | 511        |                                                               |          |                                           |                                                                                                                                                                                                                                                            |                                                                                                                            |                                                                                                             |                                                                                                                                                                                        |                                                                                                                                                                                                                                                               |       |       |        |                                                         |                                                                |                                                                                                        |                                                                                                                      |                       |         |         |  |  |
| Other2<br>[_____]        | 512        |                                                               |          |                                           |                                                                                                                                                                                                                                                            |                                                                                                                            |                                                                                                             |                                                                                                                                                                                        |                                                                                                                                                                                                                                                               |       |       |        |                                                         |                                                                |                                                                                                        |                                                                                                                      |                       |         |         |  |  |

**Note:\* Consumption assets are used by household members that do not generate income. Productive assets are used for generating income.**  
 For example, a milk cow is a consumption asset if its milk is used for only consumption for the household and not sold; but if the milk is sold then the milk cow is considered as a productive asset because it generates income for the household. If the milk is consumed by the household and also sold for income then the milk cow is considered as both consumption and productive asset.

Household Number:

**Module D2: Agricultural Implements and Other Productive assets (Male)**

|                                 |            |                                                                |          |                                           |                                                                                                                                                                                                                                          |        |        |                                                                                                                                                                         |                                                                                     |                                                                   | N/A for GFSS BASELINE                                                                               |                                                                                                                              |                                                                                                                                                     |                                                                                                                                                |                                      |                     |        |        |
|---------------------------------|------------|----------------------------------------------------------------|----------|-------------------------------------------|------------------------------------------------------------------------------------------------------------------------------------------------------------------------------------------------------------------------------------------|--------|--------|-------------------------------------------------------------------------------------------------------------------------------------------------------------------------|-------------------------------------------------------------------------------------|-------------------------------------------------------------------|-----------------------------------------------------------------------------------------------------|------------------------------------------------------------------------------------------------------------------------------|-----------------------------------------------------------------------------------------------------------------------------------------------------|------------------------------------------------------------------------------------------------------------------------------------------------|--------------------------------------|---------------------|--------|--------|
| Description of asset            | Asset code | Does your household own the item?<br>Yes...1<br>No...2>> D2_12 | Quantity | What portion of asset owned by household? | ID of owner<br>Report three primary owners<br>If household member, write MID<br>If not household member, then use following codes:<br><br>All members jointly..... 71<br>Male outside household..... 72<br>Female outside household.. 73 |        |        | How was the asset acquired?<br>(report most recent item if quantity >1)<br><br>Purchase..... 1<br>Gift .....2<br>Dowry .....3<br>Inheritance .....4<br>Own produced...5 | Year of purchase/acquisition<br>(report for the most expensive item if quantity >1) | Purchase value/ price<br>(report total value for all items owned) | Current value/ if asset sold today how much will you receive?<br>(report total value for all items) | In the last round (2015), what was the quantity of assets in this household?<br>(Number)<br>If '0' then move to the next row | What quantity of assets recorded in the last round (2015) have you lost after the last survey?<br>(Stolen, burnt, lost, damaged, dead etc.)(Number) | What quantity of assets recorded in the last round (2015) have you sold after the last survey?<br>(Number)<br>If '0' then move to the next row | What was the value of sales?<br>(Tk) | Reason for selling? |        |        |
|                                 |            |                                                                |          |                                           | MID                                                                                                                                                                                                                                      |        |        |                                                                                                                                                                         |                                                                                     |                                                                   |                                                                                                     |                                                                                                                              |                                                                                                                                                     |                                                                                                                                                |                                      | Code ↑              | Year   | (Tk)   |
| D2_01                           | D2_02      | D2_03                                                          | D2_04    | D2_05                                     | D2_06a                                                                                                                                                                                                                                   | D2_06b | D2_06c | D2_07                                                                                                                                                                   | D2_08                                                                               | D2_09                                                             | D2_10                                                                                               | D2_12                                                                                                                        | D2_13                                                                                                                                               | D2_14                                                                                                                                          | D2_15                                | D2_16a              | D2_16b | D2_16c |
| <b>Farming tools:</b>           |            |                                                                |          |                                           |                                                                                                                                                                                                                                          |        |        |                                                                                                                                                                         |                                                                                     |                                                                   |                                                                                                     |                                                                                                                              |                                                                                                                                                     |                                                                                                                                                |                                      |                     |        |        |
| Manual Reaper/Sickle            | 1          |                                                                |          |                                           |                                                                                                                                                                                                                                          |        |        |                                                                                                                                                                         |                                                                                     |                                                                   |                                                                                                     |                                                                                                                              |                                                                                                                                                     |                                                                                                                                                |                                      |                     |        |        |
| Weeding tool                    | 2          |                                                                |          |                                           |                                                                                                                                                                                                                                          |        |        |                                                                                                                                                                         |                                                                                     |                                                                   |                                                                                                     |                                                                                                                              |                                                                                                                                                     |                                                                                                                                                |                                      |                     |        |        |
| Harrow                          | 3          |                                                                |          |                                           |                                                                                                                                                                                                                                          |        |        |                                                                                                                                                                         |                                                                                     |                                                                   |                                                                                                     |                                                                                                                              |                                                                                                                                                     |                                                                                                                                                |                                      |                     |        |        |
| Rake                            | 4          |                                                                |          |                                           |                                                                                                                                                                                                                                          |        |        |                                                                                                                                                                         |                                                                                     |                                                                   |                                                                                                     |                                                                                                                              |                                                                                                                                                     |                                                                                                                                                |                                      |                     |        |        |
| Plough/ yoke                    | 5          |                                                                |          |                                           |                                                                                                                                                                                                                                          |        |        |                                                                                                                                                                         |                                                                                     |                                                                   |                                                                                                     |                                                                                                                              |                                                                                                                                                     |                                                                                                                                                |                                      |                     |        |        |
| Winnowing Machine               | 6          |                                                                |          |                                           |                                                                                                                                                                                                                                          |        |        |                                                                                                                                                                         |                                                                                     |                                                                   |                                                                                                     |                                                                                                                              |                                                                                                                                                     |                                                                                                                                                |                                      |                     |        |        |
| Pesticide sprayer               | 7          |                                                                |          |                                           |                                                                                                                                                                                                                                          |        |        |                                                                                                                                                                         |                                                                                     |                                                                   |                                                                                                     |                                                                                                                              |                                                                                                                                                     |                                                                                                                                                |                                      |                     |        |        |
| Wheelbarrow                     | 8          |                                                                |          |                                           |                                                                                                                                                                                                                                          |        |        |                                                                                                                                                                         |                                                                                     |                                                                   |                                                                                                     |                                                                                                                              |                                                                                                                                                     |                                                                                                                                                |                                      |                     |        |        |
| Bullock cart                    | 9          |                                                                |          |                                           |                                                                                                                                                                                                                                          |        |        |                                                                                                                                                                         |                                                                                     |                                                                   |                                                                                                     |                                                                                                                              |                                                                                                                                                     |                                                                                                                                                |                                      |                     |        |        |
| Push cart                       | 10         |                                                                |          |                                           |                                                                                                                                                                                                                                          |        |        |                                                                                                                                                                         |                                                                                     |                                                                   |                                                                                                     |                                                                                                                              |                                                                                                                                                     |                                                                                                                                                |                                      |                     |        |        |
| Other Light Machinery (Specify) | 11         |                                                                |          |                                           |                                                                                                                                                                                                                                          |        |        |                                                                                                                                                                         |                                                                                     |                                                                   |                                                                                                     |                                                                                                                              |                                                                                                                                                     |                                                                                                                                                |                                      |                     |        |        |
| <b>Machinery:</b>               |            |                                                                |          |                                           |                                                                                                                                                                                                                                          |        |        |                                                                                                                                                                         |                                                                                     |                                                                   |                                                                                                     |                                                                                                                              |                                                                                                                                                     |                                                                                                                                                |                                      |                     |        |        |
| Tractor                         | 12         |                                                                |          |                                           |                                                                                                                                                                                                                                          |        |        |                                                                                                                                                                         |                                                                                     |                                                                   |                                                                                                     |                                                                                                                              |                                                                                                                                                     |                                                                                                                                                |                                      |                     |        |        |
| Power Tiller                    | 13         |                                                                |          |                                           |                                                                                                                                                                                                                                          |        |        |                                                                                                                                                                         |                                                                                     |                                                                   |                                                                                                     |                                                                                                                              |                                                                                                                                                     |                                                                                                                                                |                                      |                     |        |        |
| Trolley/Trailers                | 14         |                                                                |          |                                           |                                                                                                                                                                                                                                          |        |        |                                                                                                                                                                         |                                                                                     |                                                                   |                                                                                                     |                                                                                                                              |                                                                                                                                                     |                                                                                                                                                |                                      |                     |        |        |
| Thresher                        | 15         |                                                                |          |                                           |                                                                                                                                                                                                                                          |        |        |                                                                                                                                                                         |                                                                                     |                                                                   |                                                                                                     |                                                                                                                              |                                                                                                                                                     |                                                                                                                                                |                                      |                     |        |        |
| Fodder cutting machine          | 16         |                                                                |          |                                           |                                                                                                                                                                                                                                          |        |        |                                                                                                                                                                         |                                                                                     |                                                                   |                                                                                                     |                                                                                                                              |                                                                                                                                                     |                                                                                                                                                |                                      |                     |        |        |

Household Number:

|                                         |            |                                                                 |          |                                           |                                                                                                                                                                                                                                           |        |        |                                                                                                                                                                        |       |       | N/A for GFSS BASELINE |       |                                                                                     |                                                                   |                                                                                                     |                                                                                                                              |                                                                                                                                                     |                                                                                                                                                |                                      |                     |      |      |
|-----------------------------------------|------------|-----------------------------------------------------------------|----------|-------------------------------------------|-------------------------------------------------------------------------------------------------------------------------------------------------------------------------------------------------------------------------------------------|--------|--------|------------------------------------------------------------------------------------------------------------------------------------------------------------------------|-------|-------|-----------------------|-------|-------------------------------------------------------------------------------------|-------------------------------------------------------------------|-----------------------------------------------------------------------------------------------------|------------------------------------------------------------------------------------------------------------------------------|-----------------------------------------------------------------------------------------------------------------------------------------------------|------------------------------------------------------------------------------------------------------------------------------------------------|--------------------------------------|---------------------|------|------|
| Description of asset                    | Asset code | Does your household own the item?<br>Yes...1<br>No....2>> D2_12 | Quantity | What portion of asset owned by household? | ID of owner<br>Report three primary owners<br>If household member, write MID<br>If not household member, then use following codes:<br><br>All members jointly ..... 71<br>Male outside household..... 72<br>Female outside household.. 73 |        |        | How was the asset acquired?<br>(report most recent item if quantity >1)<br><br>Purchase.....1<br>Gift .....2<br>Dowry .....3<br>Inheritance .....4<br>Own produced...5 |       |       |                       |       | Year of purchase/acquisition<br>(report for the most expensive item if quantity >1) | Purchase value/ price<br>(report total value for all items owned) | Current value/ if asset sold today how much will you receive?<br>(report total value for all items) | In the last round (2015), what was the quantity of assets in this household?<br>(Number)<br>If '0' then move to the next row | What quantity of assets recorded in the last round (2015) have you lost after the last survey?<br>(Stolen, burnt, lost, damaged, dead etc.)(Number) | What quantity of assets recorded in the last round (2015) have you sold after the last survey?<br>(Number)<br>If '0' then move to the next row | What was the value of sales?<br>(Tk) | Reason for selling? |      |      |
|                                         |            |                                                                 |          |                                           | MID                                                                                                                                                                                                                                       |        |        | Code ↑                                                                                                                                                                 | Year  | (Tk)  | (Tk)                  | (No)  |                                                                                     |                                                                   |                                                                                                     |                                                                                                                              |                                                                                                                                                     |                                                                                                                                                |                                      | (No)                | (No) | (Tk) |
| D2_01                                   | D2_02      | D2_03                                                           | D2_04    | D2_05                                     | D2_06a                                                                                                                                                                                                                                    | D2_06b | D2_06c | D2_07                                                                                                                                                                  | D2_08 | D2_09 | D2_10                 | D2_12 | D2_13                                                                               | D2_14                                                             | D2_15                                                                                               | D2_16a                                                                                                                       | D2_16b                                                                                                                                              | D2_16c                                                                                                                                         |                                      |                     |      |      |
| Swing basket                            | 17         |                                                                 |          |                                           |                                                                                                                                                                                                                                           |        |        |                                                                                                                                                                        |       |       |                       |       |                                                                                     |                                                                   |                                                                                                     |                                                                                                                              |                                                                                                                                                     |                                                                                                                                                |                                      |                     |      |      |
| Don                                     | 18         |                                                                 |          |                                           |                                                                                                                                                                                                                                           |        |        |                                                                                                                                                                        |       |       |                       |       |                                                                                     |                                                                   |                                                                                                     |                                                                                                                              |                                                                                                                                                     |                                                                                                                                                |                                      |                     |      |      |
| Hand tube well                          | 19         |                                                                 |          |                                           |                                                                                                                                                                                                                                           |        |        |                                                                                                                                                                        |       |       |                       |       |                                                                                     |                                                                   |                                                                                                     |                                                                                                                              |                                                                                                                                                     |                                                                                                                                                |                                      |                     |      |      |
| Treadle pump                            | 20         |                                                                 |          |                                           |                                                                                                                                                                                                                                           |        |        |                                                                                                                                                                        |       |       |                       |       |                                                                                     |                                                                   |                                                                                                     |                                                                                                                              |                                                                                                                                                     |                                                                                                                                                |                                      |                     |      |      |
| Rower pump                              | 21         |                                                                 |          |                                           |                                                                                                                                                                                                                                           |        |        |                                                                                                                                                                        |       |       |                       |       |                                                                                     |                                                                   |                                                                                                     |                                                                                                                              |                                                                                                                                                     |                                                                                                                                                |                                      |                     |      |      |
| Jumbo Pump<br>(Axial Flow pump)         | 36         |                                                                 |          |                                           |                                                                                                                                                                                                                                           |        |        |                                                                                                                                                                        |       |       |                       |       |                                                                                     |                                                                   |                                                                                                     |                                                                                                                              |                                                                                                                                                     |                                                                                                                                                |                                      |                     |      |      |
| Low lift pump<br>(LLP) for irrigation   | 22         |                                                                 |          |                                           |                                                                                                                                                                                                                                           |        |        |                                                                                                                                                                        |       |       |                       |       |                                                                                     |                                                                   |                                                                                                     |                                                                                                                              |                                                                                                                                                     |                                                                                                                                                |                                      |                     |      |      |
| Shallow tube well (STW)                 | 23         |                                                                 |          |                                           |                                                                                                                                                                                                                                           |        |        |                                                                                                                                                                        |       |       |                       |       |                                                                                     |                                                                   |                                                                                                     |                                                                                                                              |                                                                                                                                                     |                                                                                                                                                |                                      |                     |      |      |
| Deep tube well (DTW)                    | 24         |                                                                 |          |                                           |                                                                                                                                                                                                                                           |        |        |                                                                                                                                                                        |       |       |                       |       |                                                                                     |                                                                   |                                                                                                     |                                                                                                                              |                                                                                                                                                     |                                                                                                                                                |                                      |                     |      |      |
| Electric motor pump                     | 25         |                                                                 |          |                                           |                                                                                                                                                                                                                                           |        |        |                                                                                                                                                                        |       |       |                       |       |                                                                                     |                                                                   |                                                                                                     |                                                                                                                              |                                                                                                                                                     |                                                                                                                                                |                                      |                     |      |      |
| Diesel motor pump                       | 26         |                                                                 |          |                                           |                                                                                                                                                                                                                                           |        |        |                                                                                                                                                                        |       |       |                       |       |                                                                                     |                                                                   |                                                                                                     |                                                                                                                              |                                                                                                                                                     |                                                                                                                                                |                                      |                     |      |      |
| Spraying machines<br>(chem./fertilizer) | 27         |                                                                 |          |                                           |                                                                                                                                                                                                                                           |        |        |                                                                                                                                                                        |       |       |                       |       |                                                                                     |                                                                   |                                                                                                     |                                                                                                                              |                                                                                                                                                     |                                                                                                                                                |                                      |                     |      |      |
| Reaper                                  | 28         |                                                                 |          |                                           |                                                                                                                                                                                                                                           |        |        |                                                                                                                                                                        |       |       |                       |       |                                                                                     |                                                                   |                                                                                                     |                                                                                                                              |                                                                                                                                                     |                                                                                                                                                |                                      |                     |      |      |

Household Number:

|                                                      |            |                                                                 |          |                                           |                                                                                                                                                                                                                                           |        |        |                                                                                                                                                                        |       |        | N/A for GFSS BASELINE                                                               |                                                                   |                                                                                                     |                                                                                                                              |       |                                                                                                                                                     |        |                                                                                                                                                |      |                                      |        |                                                                                                                                                                                                                                                          |  |  |
|------------------------------------------------------|------------|-----------------------------------------------------------------|----------|-------------------------------------------|-------------------------------------------------------------------------------------------------------------------------------------------------------------------------------------------------------------------------------------------|--------|--------|------------------------------------------------------------------------------------------------------------------------------------------------------------------------|-------|--------|-------------------------------------------------------------------------------------|-------------------------------------------------------------------|-----------------------------------------------------------------------------------------------------|------------------------------------------------------------------------------------------------------------------------------|-------|-----------------------------------------------------------------------------------------------------------------------------------------------------|--------|------------------------------------------------------------------------------------------------------------------------------------------------|------|--------------------------------------|--------|----------------------------------------------------------------------------------------------------------------------------------------------------------------------------------------------------------------------------------------------------------|--|--|
| Description of asset                                 | Asset code | Does your household own the item?<br>Yes...1<br>No....2>> D2_12 | Quantity | What portion of asset owned by household? | ID of owner<br>Report three primary owners<br>If household member, write MID<br>If not household member, then use following codes:<br><br>All members jointly ..... 71<br>Male outside household..... 72<br>Female outside household.. 73 |        |        | How was the asset acquired?<br>(report most recent item if quantity >1)<br><br>Purchase.....1<br>Gift .....2<br>Dowry .....3<br>Inheritance .....4<br>Own produced...5 |       |        | Year of purchase/acquisition<br>(report for the most expensive item if quantity >1) | Purchase value/ price<br>(report total value for all items owned) | Current value/ if asset sold today how much will you receive?<br>(report total value for all items) | In the last round (2015), what was the quantity of assets in this household?<br>(Number)<br>If '0' then move to the next row |       | What quantity of assets recorded in the last round (2015) have you lost after the last survey?<br>(Stolen, burnt, lost, damaged, dead etc.)(Number) |        | What quantity of assets recorded in the last round (2015) have you sold after the last survey?<br>(Number)<br>If '0' then move to the next row |      | What was the value of sales?<br>(Tk) |        | Reason for selling?<br><br>To meet household's food needs ..... 1<br>To meet needs other than food ..... 2<br>To meet children's education needs ..3<br>For treatment .....4<br>To purchase assets .....5<br>For emergency ....6<br>Others (specify) ..7 |  |  |
|                                                      |            |                                                                 |          |                                           | Code                                                                                                                                                                                                                                      | No.    | MID    |                                                                                                                                                                        |       | Code ↑ |                                                                                     |                                                                   |                                                                                                     | Year                                                                                                                         | (Tk)  | (Tk)                                                                                                                                                | (No)   | (No)                                                                                                                                           | (No) | (Tk)                                 | Code ↑ |                                                                                                                                                                                                                                                          |  |  |
| D2_01                                                | D2_02      | D2_03                                                           | D2_04    | D2_05                                     | D2_06a                                                                                                                                                                                                                                    | D2_06b | D2_06c | D2_07                                                                                                                                                                  | D2_08 | D2_09  | D2_10                                                                               | D2_12                                                             | D2_13                                                                                               | D2_14                                                                                                                        | D2_15 | D2_16a                                                                                                                                              | D2_16b | D2_16c                                                                                                                                         |      |                                      |        |                                                                                                                                                                                                                                                          |  |  |
| Seeder Drills: till, plant, fertilize simultaneously | 37         |                                                                 |          |                                           |                                                                                                                                                                                                                                           |        |        |                                                                                                                                                                        |       |        |                                                                                     |                                                                   |                                                                                                     |                                                                                                                              |       |                                                                                                                                                     |        |                                                                                                                                                |      |                                      |        |                                                                                                                                                                                                                                                          |  |  |
| Bed planters (forms fields into beds and furrows)    | 38         |                                                                 |          |                                           |                                                                                                                                                                                                                                           |        |        |                                                                                                                                                                        |       |        |                                                                                     |                                                                   |                                                                                                     |                                                                                                                              |       |                                                                                                                                                     |        |                                                                                                                                                |      |                                      |        |                                                                                                                                                                                                                                                          |  |  |
| Other Heavy Machinery (Specify)                      | 29         |                                                                 |          |                                           |                                                                                                                                                                                                                                           |        |        |                                                                                                                                                                        |       |        |                                                                                     |                                                                   |                                                                                                     |                                                                                                                              |       |                                                                                                                                                     |        |                                                                                                                                                |      |                                      |        |                                                                                                                                                                                                                                                          |  |  |
| <b>Other productive</b>                              |            |                                                                 |          |                                           |                                                                                                                                                                                                                                           |        |        |                                                                                                                                                                        |       |        |                                                                                     |                                                                   |                                                                                                     |                                                                                                                              |       |                                                                                                                                                     |        |                                                                                                                                                |      |                                      |        |                                                                                                                                                                                                                                                          |  |  |
| Masons                                               | 30         |                                                                 |          |                                           |                                                                                                                                                                                                                                           |        |        |                                                                                                                                                                        |       |        |                                                                                     |                                                                   |                                                                                                     |                                                                                                                              |       |                                                                                                                                                     |        |                                                                                                                                                |      |                                      |        |                                                                                                                                                                                                                                                          |  |  |
| Potters Chaka                                        | 31         |                                                                 |          |                                           |                                                                                                                                                                                                                                           |        |        |                                                                                                                                                                        |       |        |                                                                                     |                                                                   |                                                                                                     |                                                                                                                              |       |                                                                                                                                                     |        |                                                                                                                                                |      |                                      |        |                                                                                                                                                                                                                                                          |  |  |
| Blacksmiths Hapor                                    | 32         |                                                                 |          |                                           |                                                                                                                                                                                                                                           |        |        |                                                                                                                                                                        |       |        |                                                                                     |                                                                   |                                                                                                     |                                                                                                                              |       |                                                                                                                                                     |        |                                                                                                                                                |      |                                      |        |                                                                                                                                                                                                                                                          |  |  |
| Charka                                               | 33         |                                                                 |          |                                           |                                                                                                                                                                                                                                           |        |        |                                                                                                                                                                        |       |        |                                                                                     |                                                                   |                                                                                                     |                                                                                                                              |       |                                                                                                                                                     |        |                                                                                                                                                |      |                                      |        |                                                                                                                                                                                                                                                          |  |  |
| Briquette Urea Applicator (Injector)                 | 34         |                                                                 |          |                                           |                                                                                                                                                                                                                                           |        |        |                                                                                                                                                                        |       |        |                                                                                     |                                                                   |                                                                                                     |                                                                                                                              |       |                                                                                                                                                     |        |                                                                                                                                                |      |                                      |        |                                                                                                                                                                                                                                                          |  |  |
| Briquette Urea Applicator (Push)                     | 35         |                                                                 |          |                                           |                                                                                                                                                                                                                                           |        |        |                                                                                                                                                                        |       |        |                                                                                     |                                                                   |                                                                                                     |                                                                                                                              |       |                                                                                                                                                     |        |                                                                                                                                                |      |                                      |        |                                                                                                                                                                                                                                                          |  |  |
| Combined harvester                                   | 39         |                                                                 |          |                                           |                                                                                                                                                                                                                                           |        |        |                                                                                                                                                                        |       |        |                                                                                     |                                                                   |                                                                                                     |                                                                                                                              |       |                                                                                                                                                     |        |                                                                                                                                                |      |                                      |        |                                                                                                                                                                                                                                                          |  |  |

Household Number:

|                                    |            |                                                                 |          |                                           |                                                                                                                                                                                                                                           |        |        |                                                                                                                                                                        |       |                                                                                     | N/A for GFSS BASELINE                                             |                                                                                                     |                                                                                                                              |       |                                                                                                                                                     |        |                                                                                                                                                |        |                                      |                                                                                                                                                                                                                                                              |      |        |
|------------------------------------|------------|-----------------------------------------------------------------|----------|-------------------------------------------|-------------------------------------------------------------------------------------------------------------------------------------------------------------------------------------------------------------------------------------------|--------|--------|------------------------------------------------------------------------------------------------------------------------------------------------------------------------|-------|-------------------------------------------------------------------------------------|-------------------------------------------------------------------|-----------------------------------------------------------------------------------------------------|------------------------------------------------------------------------------------------------------------------------------|-------|-----------------------------------------------------------------------------------------------------------------------------------------------------|--------|------------------------------------------------------------------------------------------------------------------------------------------------|--------|--------------------------------------|--------------------------------------------------------------------------------------------------------------------------------------------------------------------------------------------------------------------------------------------------------------|------|--------|
| Description of asset               | Asset code | Does your household own the item?<br>Yes...1<br>No....2>> D2_12 | Quantity | What portion of asset owned by household? | ID of owner<br>Report three primary owners<br>If household member, write MID<br>If not household member, then use following codes:<br><br>All members jointly ..... 71<br>Male outside household..... 72<br>Female outside household.. 73 |        |        | How was the asset acquired?<br>(report most recent item if quantity >1)<br><br>Purchase.....1<br>Gift .....2<br>Dowry .....3<br>Inheritance .....4<br>Own produced...5 |       | Year of purchase/acquisition<br>(report for the most expensive item if quantity >1) | Purchase value/ price<br>(report total value for all items owned) | Current value/ if asset sold today how much will you receive?<br>(report total value for all items) | In the last round (2015), what was the quantity of assets in this household?<br>(Number)<br>If '0' then move to the next row |       | What quantity of assets recorded in the last round (2015) have you lost after the last survey?<br>(Stolen, burnt, lost, damaged, dead etc.)(Number) |        | What quantity of assets recorded in the last round (2015) have you sold after the last survey?<br>(Number)<br>If '0' then move to the next row |        | What was the value of sales?<br>(Tk) | Reason for selling?<br><br>To meet household's food needs ..... 1<br>To meet needs other than food ..... 2<br>To meet children's education needs ...3<br>For treatment .....4<br>To purchase assets ..... 5<br>For emergency .... 6<br>Others (specify) .. 7 |      |        |
|                                    |            |                                                                 |          |                                           | Code                                                                                                                                                                                                                                      | No.    | MID    |                                                                                                                                                                        |       |                                                                                     |                                                                   |                                                                                                     | Code ↑                                                                                                                       | Year  | (Tk)                                                                                                                                                | (Tk)   | (No)                                                                                                                                           | (No)   |                                      | (No)                                                                                                                                                                                                                                                         | (Tk) | Code ↑ |
| D2_01                              | D2_02      | D2_03                                                           | D2_04    | D2_05                                     | D2_06a                                                                                                                                                                                                                                    | D2_06b | D2_06c | D2_07                                                                                                                                                                  | D2_08 | D2_09                                                                               | D2_10                                                             | D2_12                                                                                               | D2_13                                                                                                                        | D2_14 | D2_15                                                                                                                                               | D2_16a | D2_16b                                                                                                                                         | D2_16c |                                      |                                                                                                                                                                                                                                                              |      |        |
| Rice trans planter                 | 40         |                                                                 |          |                                           |                                                                                                                                                                                                                                           |        |        |                                                                                                                                                                        |       |                                                                                     |                                                                   |                                                                                                     |                                                                                                                              |       |                                                                                                                                                     |        |                                                                                                                                                |        |                                      |                                                                                                                                                                                                                                                              |      |        |
| Closed drum thresher               | 41         |                                                                 |          |                                           |                                                                                                                                                                                                                                           |        |        |                                                                                                                                                                        |       |                                                                                     |                                                                   |                                                                                                     |                                                                                                                              |       |                                                                                                                                                     |        |                                                                                                                                                |        |                                      |                                                                                                                                                                                                                                                              |      |        |
| Open drum thresher                 | 42         |                                                                 |          |                                           |                                                                                                                                                                                                                                           |        |        |                                                                                                                                                                        |       |                                                                                     |                                                                   |                                                                                                     |                                                                                                                              |       |                                                                                                                                                     |        |                                                                                                                                                |        |                                      |                                                                                                                                                                                                                                                              |      |        |
| Corn Sheller                       | 43         |                                                                 |          |                                           |                                                                                                                                                                                                                                           |        |        |                                                                                                                                                                        |       |                                                                                     |                                                                   |                                                                                                     |                                                                                                                              |       |                                                                                                                                                     |        |                                                                                                                                                |        |                                      |                                                                                                                                                                                                                                                              |      |        |
| Sugarcane crusher                  | 44         |                                                                 |          |                                           |                                                                                                                                                                                                                                           |        |        |                                                                                                                                                                        |       |                                                                                     |                                                                   |                                                                                                     |                                                                                                                              |       |                                                                                                                                                     |        |                                                                                                                                                |        |                                      |                                                                                                                                                                                                                                                              |      |        |
| There No agriculture asset in this | 99         |                                                                 |          |                                           |                                                                                                                                                                                                                                           |        |        |                                                                                                                                                                        |       |                                                                                     |                                                                   |                                                                                                     |                                                                                                                              |       |                                                                                                                                                     |        |                                                                                                                                                |        |                                      |                                                                                                                                                                                                                                                              |      |        |

Module End Time: 

|      |  |  |        |  |  |
|------|--|--|--------|--|--|
| Hour |  |  | Minute |  |  |
|------|--|--|--------|--|--|

Household Number:

**Module E: Savings (Male)**

Module start time: Hour   Minu   Respondent ID:  Consent :  Yes...1  
No.....2

**E01.** Have any adult in the household had any savings in the past 1 year?  Yes ..... 1  
 No..... 2

**E02.** Does any adult in the household currently have any savings?  Yes..... 1  
 No..... 2

**If NO, END MODULE**

Ask how many accounts each individual currently has and list them all. Each “account” should have a separate row. If the individual has more than one “account”, put in separate rows.

| Serial No. | Saver      | Where do you save? | If the source of savings is the NGO, then record the code for NGO | How do you use / plan to use the savings?<br><b>Report primary use of savings</b> | Total amount currently saved in this savings account? | How frequently do you save? |
|------------|------------|--------------------|-------------------------------------------------------------------|-----------------------------------------------------------------------------------|-------------------------------------------------------|-----------------------------|
|            |            | [Code 1]           | [Code 4]                                                          | [Code 2]                                                                          | (Tk)                                                  | [Code 3]                    |
| <b>E03</b> | <b>MID</b> | <b>E04</b>         | <b>E08</b>                                                        | <b>E05</b>                                                                        | <b>E06</b>                                            | <b>E07</b>                  |
|            |            |                    |                                                                   |                                                                                   |                                                       |                             |
|            |            |                    |                                                                   |                                                                                   |                                                       |                             |
|            |            |                    |                                                                   |                                                                                   |                                                       |                             |
|            |            |                    |                                                                   |                                                                                   |                                                       |                             |

| Code 1: Where         | Code 4:NGO Code              | Code 2: Use / Intended Use               | Code 3: How frequently do you save |
|-----------------------|------------------------------|------------------------------------------|------------------------------------|
| At home ..... 1       | BRAC.....1                   | Ashar Alo Unnyan Shangstha .....30       | Daily ..... 1                      |
| NGO (name of          | ASA.....2                    | Polli Progoti Sohayok Samity .....31     | Weekly ..... 2                     |
| NGO) ..... 2          | PROSHIKA.....3               | Samadhan.....32                          | Monthly ..... 3                    |
| Shamity (other than   | Karitas Bangladesh.....4     | Manob Seba Sangstha .....33              | Quarterly ..... 4                  |
| NGO) ..... 3          | Shwanirbhar Bangladesh.....5 | Nobolok Parishad.....34                  | Biannually (every 6 months).. 5    |
| Bank ..... 4          | TMSS.....6                   | Rural reconstruction Foundation (RRF) 35 | Yearly ..... 6                     |
| Shop ..... 5          | RDRS Bangladesh.....7        | Christian Civil Society (CSS) .....36    | Not regularly ..... 7              |
| Post office /         | Bureau Tangail.....8         | Uddipon .....37                          |                                    |
| government            | Jagoroni Chakra.....9        | Daak diye jai .....38                    |                                    |
| institution ..... 6   | Voluntary Organization for   | Shushilon .....39                        |                                    |
| Employer’s            | Social Development           | Uttaran .....40                          |                                    |
| provident fund .... 7 | (VOSD).....10                | Unnyan Procheshta .....41                |                                    |
| Insurance company     | Peoples Oriented Program     | Setu Bangladesh .....42                  |                                    |
| ..... 8               | Implementation (POPI).....11 | Satkhira Unnyan Shangstha (SUK) 43       |                                    |
| Relative / friend /   | Gono Kalyan Trust (GKT).12   | Ideal .....44                            |                                    |
| neighbor ..... 9      | Bachte Shekha.....13         | Manob Sompod Unnyan kendra....45         |                                    |
| Savings collector     | PKSF.....14                  | Grameen bank .....46                     |                                    |
| ..... 10              | Bangladesh Rural             | HKI (Hellen Keller International).47     |                                    |
| Land leased in        | Development                  | Other NGOs (specify) 48                  |                                    |
| from other            | Board(BRDB.....15            |                                          |                                    |
| household ..... 11    |                              |                                          |                                    |
| Other (specify)       |                              |                                          |                                    |
| 12                    |                              |                                          |                                    |

|                      |                      |   |                      |
|----------------------|----------------------|---|----------------------|
| <b>END TIME</b>      |                      |   |                      |
| <input type="text"/> | <input type="text"/> | : | <input type="text"/> |
| HOUR                 |                      |   | MINUTE               |

Household Number:

**Module F: Loans (Male)**

Module start time: Hour    Minu

Respondent ID:  Consent :

Yes ...1  
No.....2

*Report cash loans. Include both interest-bearing and non-interest-bearing cash loans.*

**F01.** Has any member in the household ever had any loans?  Yes ..... 1  
 No ..... 2

**F02.** Does any member in the household currently have a loan with any individual or institution?  Yes ..... 1 >> Fill out the table below  
 No ..... 2

**F02\_a** Have you or any other member of the household applied for loans in the last 12 months  Yes..... 1 >> F02\_b  
 No ..... 2 >> F02\_c

**F02\_b** If you applied for loans, what was the reason for your application being denied?

- Did not have collateral.....1
- Did not have enough savings to qualify for loan...2
- Did not repay previous loans (loan defaulter) .....3
- Don't know.....4
- Applied for and received loan (repaid) .....5
- Other (specify)... .....6

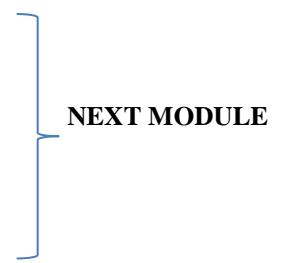

**F02\_c** If you did not apply for loans, why did you not apply?

- Did not need loan, and so did not apply.....1
- Needed loan but did not apply fearing rejection of application .....2
- Needed loan but did not apply fearing not receiving the loan on time.....3
- Needed loan but did not apply fearing high interest rates.....4
- Could not apply for not having collateral.....5
- Others (specify) .....6

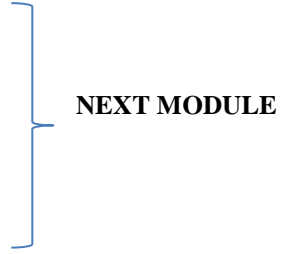



Household Number:

**First ask how many loans each individual currently has and list them all. Each loan should have a separate row. If an individual has more than one loan, put in separate rows.**

| Serial No. | Who took the loan? | What was the source of the loan? | If the source is an NGO, write the code of that NGO | What was the loan mainly used for?<br>Report primary 3 uses | Amount of loan | What was the interest rate?<br>(Report 999 if respondent does not know the interest rate) | What is the outstanding amount of the loan? | Is the outstanding amount with or without interest?<br>With interest..... 1<br>Without interest..... 2 | What is the maximum that you can borrow from this source? | What amount of borrowings have you applied for from this source? |     |     |
|------------|--------------------|----------------------------------|-----------------------------------------------------|-------------------------------------------------------------|----------------|-------------------------------------------------------------------------------------------|---------------------------------------------|--------------------------------------------------------------------------------------------------------|-----------------------------------------------------------|------------------------------------------------------------------|-----|-----|
|            |                    | [Code 1]                         | [Code 2]                                            | [Code 3]                                                    | (Tk)           | (percent)                                                                                 | (Tk)                                        | Code ↑                                                                                                 | (Tk)                                                      | (Tk)                                                             |     |     |
| F03        | MID                | F04                              | F05                                                 | F06_a                                                       | F06_b          | F06_c                                                                                     | F07                                         | F08                                                                                                    | F09                                                       | F10                                                              | F11 | F12 |
|            |                    |                                  |                                                     |                                                             |                |                                                                                           |                                             |                                                                                                        |                                                           |                                                                  |     |     |
|            |                    |                                  |                                                     |                                                             |                |                                                                                           |                                             |                                                                                                        |                                                           |                                                                  |     |     |
|            |                    |                                  |                                                     |                                                             |                |                                                                                           |                                             |                                                                                                        |                                                           |                                                                  |     |     |
|            |                    |                                  |                                                     |                                                             |                |                                                                                           |                                             |                                                                                                        |                                                           |                                                                  |     |     |
|            |                    |                                  |                                                     |                                                             |                |                                                                                           |                                             |                                                                                                        |                                                           |                                                                  |     |     |

| Code 1: Source of loan             | Code 2 :NGO                                                  | Code 3: Loan use                                                              |
|------------------------------------|--------------------------------------------------------------|-------------------------------------------------------------------------------|
| Relative/friend/neighbor.....1     | BRAC .....1                                                  | Business enterprise .....1                                                    |
| Bangladesh Krishi Bank (BKB) .2    | ASA .....2                                                   | To buy fertilizer .....2                                                      |
| Rajshahi Krishi Bank (RAKUB) 3     | PROSHIKA.....3                                               | To buy seeds .....3                                                           |
| Other Bank .....4                  | Karitas Bangladesh.....4                                     | To buy pesticides .....4                                                      |
| Other financial institution.....5  | Shwanirbhar Bangladesh.....5                                 | To buy irrigation equipment .....5                                            |
| NGO (name of NGO.....).....6       | TMSS .....6                                                  | To buy other agricultural implements .....6                                   |
| Employer.....7                     | RDRS Bangladesh.....7                                        | To buy water for irrigation.....7                                             |
| Shop / Dealer / Trader .....8      | <b>Bureau Tangail.....8</b>                                  | Costs of diesel/electricity for agriculture.....8                             |
| Money lender .....9                | Jagoroni Chakra .....9                                       | Labor wages for agriculture .....9                                            |
| Shamity (other than NGO) .....10   | Voluntary Organization for Social Development (VOSD)..10     | Costs of hired machines/animals for agriculture .....10                       |
| Leased out land to other HH.....11 | Peoples Oriented Program Implementation (POPI) .....11       | To buy productive assets for purposes other than agriculture .11              |
| Other (specify) .....12            | Gono Kalyan Trust (GKT) .....12                              | For lease of land for agriculture (cash only) .....12                         |
|                                    | Bachte Shekha.....13                                         | For lease of land used for purpose other than agriculture (cash only) .....13 |
|                                    | PKSF.....14                                                  |                                                                               |
|                                    | Bangladesh Rural Development Board(BRDB) .....15             |                                                                               |
|                                    | PodokhepManobik Unnyan Kendra 17                             | Purchase Land..... 14                                                         |
|                                    | Heed Bangladesh ..... 18                                     | To purchase cow/goat ..... 15                                                 |
|                                    | Bureau Bangladesh ..... 19                                   | For medical treatment ..... 16                                                |
|                                    | Community Development Center (CODEC)..... 20                 | To meet household consumption needs ..... 17                                  |
|                                    | Gono Milon Foundation..... 21                                | Rent/purchase/improve housing 18                                              |
|                                    | Shapla Ful ..... 22                                          | Educational expenses ..... 19                                                 |
|                                    | Sheba Manob kolyan Kendra (SMKK) 23                          | Marriage expenditure ..... 20                                                 |
|                                    | Society for Disadvantaged Origin (SDO) ..... 24              | Dowry ..... 21                                                                |
|                                    | Akota Shomaj Unnyan Kendra (ASUK) 25                         | Funeral ..... 22                                                              |
|                                    | Bangladesh Development Society 26                            | To lend out at higher interest.... 23                                         |
|                                    | Social Organization for Voluntary Advancement (SOVA)..... 27 | To go abroad ..... 24                                                         |
|                                    | Society development Committee (SDC) 28                       | To repay other loan ..... 25                                                  |
|                                    | Faridpur Development Agency (FDA)29                          | Other (specify) ..... 26                                                      |
|                                    | Ashar Alo Unnyan Shangstha 30                                |                                                                               |
|                                    | Polli Progoti Sohayok Samity 31                              |                                                                               |
|                                    | Samadhan..... 32                                             |                                                                               |
|                                    | Manob Seba Sangstha.....33                                   |                                                                               |
|                                    | Nobolok Parishad .....34                                     |                                                                               |
|                                    | Rural reconstruction Foundation (RRF) .....35                |                                                                               |
|                                    | Christian Civil Society (CSS) .36                            |                                                                               |
|                                    | Uddipon .....37                                              |                                                                               |
|                                    | Daak diye jai.....38                                         |                                                                               |
|                                    | Shushilon.....39                                             |                                                                               |
|                                    | Uttaran.....40                                               |                                                                               |
|                                    | Unnyan Procheshta .....41                                    |                                                                               |
|                                    | Save Bangladesh.....42                                       |                                                                               |
|                                    | Satkhira Unnyan Shangstha (SUK) .....43                      |                                                                               |
|                                    | Ideal .....44                                                |                                                                               |
|                                    | Manob Sompod Unnyan Kendra .....45                           |                                                                               |
|                                    | Grameen bank.....46                                          |                                                                               |
|                                    | HKI (Helen Keller International) .....47                     |                                                                               |
|                                    | Other NGOs (specify).....48                                  |                                                                               |

Module End Time:  Hour   Minute

Household Number:

**Module XXc: Questions on Child Marriage Law (Male and Female)**

*Ask to both male and female parents or guardians*

Now I would like to ask you some questions regarding your knowledge of child marriage law.

Module start time: Hour   Minu

Respondent ID:  Consent :  Yes ...1  
No....2

| SL     | Questions                                                                                                                                                                    | Answer                                                               | Answer code                                                                                                                                                                                                                                               |
|--------|------------------------------------------------------------------------------------------------------------------------------------------------------------------------------|----------------------------------------------------------------------|-----------------------------------------------------------------------------------------------------------------------------------------------------------------------------------------------------------------------------------------------------------|
| XXc_01 | Is there a legal minimum age of marriage for girls?"<br>Skip rest of the module if the answer is "No" or "Don't Know"                                                        | <input type="text"/>                                                 | Yes..... 1<br>No ..... 2 > next module<br>Don't know..... 3 > next module                                                                                                                                                                                 |
| XXc_02 | What is the legal minimum age of marriage for girls                                                                                                                          | <input type="text"/>                                                 | Age (year)                                                                                                                                                                                                                                                |
| XXc_03 | If a girl is married before the legal minimum age of marriage, what type of actions can the government take?<br><br>MARK ALL THAT APPLY<br><br>(multiple responses possible) | <input type="text"/><br><input type="text"/><br><input type="text"/> | Marriage is void..... 1<br>The bride would be jailed ..... 2<br>The guardian or father would be jailed or fined ..... 3<br>The husband would be jailed or fined ..... 4<br>Nothing would happen..... 5<br>Other (specify) ..... 96<br>Don't know ..... 98 |
| XXc_04 | What is the legal punishment for marrying or facilitating marriage of a girl below this age (fine amount in taka)?                                                           | <input type="text"/>                                                 | Fine (taka)<br>Do not know.....9888                                                                                                                                                                                                                       |
| XXc_05 | What is the legal punishment for marrying or facilitating marriage of a girl below this age (jail time in months)?                                                           | <input type="text"/>                                                 | Jail (months)<br>Do not know.....9888                                                                                                                                                                                                                     |
| XXc_06 | When did this law come into effect? [Year]                                                                                                                                   | <input type="text"/>                                                 | [Year]<br>Do not know.....9888                                                                                                                                                                                                                            |
| XXc_07 | Are there any exceptions to this law?                                                                                                                                        | <input type="text"/>                                                 | Yes..... 1<br>No ..... 2<br>Don't know..... 3                                                                                                                                                                                                             |
| XXc_08 | If yes, what are the exceptions<br><br>MARK ALL THAT APPLY<br><br>(multiple responses possible)                                                                              | <input type="text"/><br><input type="text"/><br><input type="text"/> | Special Exemption Clause ..... 1<br>If Parent wants..... 2<br>If Family wants..... 3<br>Other (specify)..... 47                                                                                                                                           |

Household Number:

| SL     | Questions                                                                                                                         | Answer               | Answer code                                                                                                                                                                                                                               |
|--------|-----------------------------------------------------------------------------------------------------------------------------------|----------------------|-------------------------------------------------------------------------------------------------------------------------------------------------------------------------------------------------------------------------------------------|
| XXc_09 | When did you first hear about the current law about the legal minimum age?                                                        | <input type="text"/> | Year<br>Do not know.....9888                                                                                                                                                                                                              |
| XXc_10 | Where (i.e. from which source) did you first hear/see/watch/read about the law about the current law about the legal minimum age? | <input type="text"/> | Newspaper or magazine ..... 1<br>Radio..... 2<br>Television ..... 3<br>Poster ..... 4<br>Community Programme ..... 5<br>Family ..... 6<br>Relatives ..... 7<br>Neighbors ..... 8<br>Did not hear of it..... 9<br>Other (specify) ..... 96 |
| XXc_11 | Do you know of any case of child marriage where the current law was implemented?                                                  | <input type="text"/> | Yes..... 1<br>No ..... 2                                                                                                                                                                                                                  |

Module End Time: 

|      |                      |                      |        |                      |                      |
|------|----------------------|----------------------|--------|----------------------|----------------------|
| Hour | <input type="text"/> | <input type="text"/> | Minute | <input type="text"/> | <input type="text"/> |
|------|----------------------|----------------------|--------|----------------------|----------------------|

Household Number:

**Module G: Roster of land and pond/water bodies owned or under operation (Male)**

List all land (all type of land & water bodies) owned or under operation in last 12 months [1<sup>st</sup> December (15<sup>th</sup> Agrahayon) 2017to 30<sup>th</sup> November (14<sup>th</sup> Agrahayon) 2018].

Module start time: Hour   Minu

Respondent ID:  Consent :

Yes ...1  
No.....2

| Plot ID | Plot Description | Plot Type | What was the area of land in the last round (midline) or in 2015 for GFSS? | Current Size/ Area | Status of the plot in the current round<br><br>If answer to G02 is 0 and answer to G20 is 1 to 4 then go to the next row | Distance from home<br><br>if next to home "0" | Usual flood depth (during monsoon/ flood season)<br><br>if not flooded report "0" | Soil type | Current operational status (last 12 months) | Who is the owner of the sharecropped land?<br><br>Husband's relative....1<br>Wife's relative....2<br>Non-relative....3 | Where do the owner of the sharecropped land live?<br><br>Inside village....1<br>Different village....2<br>Town....3<br>Abroad.....4 | Socio-economic status of the owner in comparison to the farmer<br><br>Richer...1<br>Same.....2<br>Poorer...3 | If the plot is rented/ leased in/out for cash, report amount received per month.<br><br>Note: Report only if response in G06 is "3" OR "6" | Who owns the plot? (member ID) Report 3 primary owners. If HH member, write MID. If outside household, use code 4. | Who owns the plot officially? Report 3 primary owners MID | Current market value of the land (amount expected to spend/ pay if you want to buy) | How was this land acquired | Year of acquisition of the land |   |     |     |     |
|---------|------------------|-----------|----------------------------------------------------------------------------|--------------------|--------------------------------------------------------------------------------------------------------------------------|-----------------------------------------------|-----------------------------------------------------------------------------------|-----------|---------------------------------------------|------------------------------------------------------------------------------------------------------------------------|-------------------------------------------------------------------------------------------------------------------------------------|--------------------------------------------------------------------------------------------------------------|--------------------------------------------------------------------------------------------------------------------------------------------|--------------------------------------------------------------------------------------------------------------------|-----------------------------------------------------------|-------------------------------------------------------------------------------------|----------------------------|---------------------------------|---|-----|-----|-----|
| Plot ID |                  | Code 1    | Decimal                                                                    | Decimal            | Code 7                                                                                                                   | Meter                                         | Feet                                                                              | Code 2    | Code 3                                      | Code ↑                                                                                                                 | Code ↑                                                                                                                              | Code ↑                                                                                                       | Tk                                                                                                                                         | MID/Code 4                                                                                                         | MID/Code 4                                                | Tk                                                                                  | Code 5                     | Year                            |   |     |     |     |
| Plot ID | Description      | G01       | G02_1                                                                      | G02                | G20                                                                                                                      | G03                                           | G04                                                                               | G05       | G06                                         | G21                                                                                                                    | G22                                                                                                                                 | G23                                                                                                          | G07                                                                                                                                        | G08                                                                                                                |                                                           |                                                                                     | G09                        |                                 |   | G10 | G11 | G12 |
|         |                  |           |                                                                            |                    |                                                                                                                          |                                               |                                                                                   |           |                                             |                                                                                                                        |                                                                                                                                     |                                                                                                              |                                                                                                                                            | A                                                                                                                  | B                                                         | C                                                                                   | A                          | B                               | C |     |     |     |
| 1       | Homestead        | 1         |                                                                            |                    |                                                                                                                          |                                               |                                                                                   |           |                                             |                                                                                                                        |                                                                                                                                     |                                                                                                              |                                                                                                                                            |                                                                                                                    |                                                           |                                                                                     |                            |                                 |   |     |     |     |
|         |                  |           |                                                                            |                    |                                                                                                                          |                                               |                                                                                   |           |                                             |                                                                                                                        |                                                                                                                                     |                                                                                                              |                                                                                                                                            |                                                                                                                    |                                                           |                                                                                     |                            |                                 |   |     |     |     |
|         |                  |           |                                                                            |                    |                                                                                                                          |                                               |                                                                                   |           |                                             |                                                                                                                        |                                                                                                                                     |                                                                                                              |                                                                                                                                            |                                                                                                                    |                                                           |                                                                                     |                            |                                 |   |     |     |     |
|         |                  |           |                                                                            |                    |                                                                                                                          |                                               |                                                                                   |           |                                             |                                                                                                                        |                                                                                                                                     |                                                                                                              |                                                                                                                                            |                                                                                                                    |                                                           |                                                                                     |                            |                                 |   |     |     |     |
|         |                  |           |                                                                            |                    |                                                                                                                          |                                               |                                                                                   |           |                                             |                                                                                                                        |                                                                                                                                     |                                                                                                              |                                                                                                                                            |                                                                                                                    |                                                           |                                                                                     |                            |                                 |   |     |     |     |

Household Number:

**Module G: Roster of land and pond/water bodies owned or under operation (continued) (Male)**

List all land (all type of land & water bodies) owned or under operation during 1st December (15<sup>th</sup> Agrahayon) 2017- 30th November (14<sup>th</sup> Agrahayon) 2018.

| Plot ID | Plot Description | In the last 12 months who decided to build any infrastructure(if any) on the plot?<br><br>Report 3 primary decision takers.<br>If HH member, write MID.<br>If outside household, use code 4. | How was the plot utilized in the last season?<br>If response is “3”-“8” then Go to next plot | Who worked on the plot last season? | Generally, who takes decision regarding type of crop to be planted/fish culture? | Generally, who takes decision regarding inputs? (seeds, fertilizer, irrigation etc.) | If any produce was sold from crops planted/fish cultured [PLOT] in the last growing season, who was responsible for taking the crop to market and negotiating the sale? | If any revenue was generated from on the [PLOT] in the last growing season, who decided how to spend the revenues? |     |   |   |     |   |   |     |   |   |     |   |   |
|---------|------------------|----------------------------------------------------------------------------------------------------------------------------------------------------------------------------------------------|----------------------------------------------------------------------------------------------|-------------------------------------|----------------------------------------------------------------------------------|--------------------------------------------------------------------------------------|-------------------------------------------------------------------------------------------------------------------------------------------------------------------------|--------------------------------------------------------------------------------------------------------------------|-----|---|---|-----|---|---|-----|---|---|-----|---|---|
| Plot ID |                  | MID/Code4                                                                                                                                                                                    | Code 6                                                                                       | MID/Code4                           | MID/Code4                                                                        | MID/Code4                                                                            | MID/Code4                                                                                                                                                               | MID/Code4                                                                                                          |     |   |   |     |   |   |     |   |   |     |   |   |
| Plot ID | Plot Description | G13                                                                                                                                                                                          |                                                                                              |                                     | G14                                                                              | G15                                                                                  |                                                                                                                                                                         |                                                                                                                    | G16 |   |   | G17 |   |   | G18 |   |   | G19 |   |   |
|         |                  | A                                                                                                                                                                                            | B                                                                                            | C                                   |                                                                                  | A                                                                                    | B                                                                                                                                                                       | C                                                                                                                  | A   | B | C | A   | B | C | A   | B | C | A   | B | C |
| 1       | Homestead        |                                                                                                                                                                                              |                                                                                              |                                     |                                                                                  |                                                                                      |                                                                                                                                                                         |                                                                                                                    |     |   |   |     |   |   |     |   |   |     |   |   |
|         |                  |                                                                                                                                                                                              |                                                                                              |                                     |                                                                                  |                                                                                      |                                                                                                                                                                         |                                                                                                                    |     |   |   |     |   |   |     |   |   |     |   |   |
|         |                  |                                                                                                                                                                                              |                                                                                              |                                     |                                                                                  |                                                                                      |                                                                                                                                                                         |                                                                                                                    |     |   |   |     |   |   |     |   |   |     |   |   |
|         |                  |                                                                                                                                                                                              |                                                                                              |                                     |                                                                                  |                                                                                      |                                                                                                                                                                         |                                                                                                                    |     |   |   |     |   |   |     |   |   |     |   |   |

| Code 1:Plot type                         | Code 2: Soil type | Code 3: Operation status                      | Code 4: Type of ownership                  | Code 5: How acquired                         | Code 6: How was the plot utilized | Code 7                                  |
|------------------------------------------|-------------------|-----------------------------------------------|--------------------------------------------|----------------------------------------------|-----------------------------------|-----------------------------------------|
| Homestead ..... 1                        | Clay ..... 1      | Fallow.....1                                  | All members jointly .....7                 | Purchased/bought ..... 1                     | Agriculture ..... 1               | Plot is the same in both rounds ..... 0 |
| Cultivable/arable land ....2             | Loam .....2       | Own operated .....2                           | .....7                                     | Inherited (wife's family) .....2             | Fisheries .....2                  | ..... 0                                 |
| Pasture.....3                            | Sandy.....3       | Rented/leased in/ for cash.....3              | 1                                          | Inherited (husband's family) ...3            | Grazing for livestock .....3      | Sold..... 1                             |
| Bush/forest .....4                       | Clay-loam....4    | Rented/leased in/crop share ....4             | Male outside household .....7              | User right (wife's family).....4             | Homestead/ house plot .....4      | Inherited or Household Split 2          |
| Waste/non-arable land....5               | Sandy-loam ..5    | Mortgaged in .....5                           | .....7                                     | User right (husband's family)..5             | Bush .....5                       | Mortgage out/ Rent ..... 3              |
| Land in riverbed .....6                  |                   | Rented/leased out/cash.....6                  | 2                                          | Rented/shared/leased/                        | Commercial/non-ag enterprise6     | erosion ..... 4                         |
| Other residential/commercial plot .....7 |                   | Rented/leased out/crop share ..7              | Female outside household .....7            | Mortgaged-in .....6                          | Fallow.....7                      | New Purchase ..... 5                    |
| Cultivable Pond.....8                    |                   | Mortgage out .....8                           | .....7                                     | Government Khas land/Other institution.....7 | Other (specify).....8             | New inheritance ..... 6                 |
| Derelict pond.....9                      |                   | Group leased in with other farmer .....9      | 3                                          |                                              | Was not with me.....9             | New Mortgage ..... 7                    |
| Garden (wood/Friut).....10               |                   | Leased out to NGO .....10                     | Govt / Khas land/other institutions .....7 |                                              |                                   | Household combined ..... 8              |
| Floating plot).....11                    |                   | Taken from joint owner .....11                | .....7                                     |                                              |                                   | Char surfaced..... 9                    |
| Only for seed bed).....12                |                   | Jointly with other owners.....12              | 4                                          |                                              |                                   | Others (specify) ..... 10               |
|                                          |                   | Rented in for certain amount of crops.....13  | Not applicable/Not decided .....9          |                                              |                                   |                                         |
|                                          |                   | Rented out for certain amount of crops.....14 | 8                                          |                                              |                                   |                                         |
|                                          |                   | Free of cost.....15                           |                                            |                                              |                                   |                                         |

Module End Time: 

|      |  |  |        |  |
|------|--|--|--------|--|
| Hour |  |  | Minute |  |
|------|--|--|--------|--|



Household Number:    **Code 1: Agriculture crop codes**

| <b>Major Cereals</b>          | <b>Pulses</b>               | <b>Vegetables</b>            | <b>Leafy vegetables</b>      | <b>Fruits (continued)</b>    | <b>Other crops (continued)</b>     |
|-------------------------------|-----------------------------|------------------------------|------------------------------|------------------------------|------------------------------------|
| B Aus (local) ..... 10        | Lentil(Moshur) ..... 51     | Pumpkin ..... 101            | Pui Shak ..... 201           | Lemon ..... 312              | Tobacco ..... 601                  |
| TAus (local)..... 11          | Mung ..... 52               | Bringal (eggplant) ..... 102 | Palang Shak (Spinach) 202    | Shaddock (pomelo)..... 313   | Bettlenut ..... 602                |
| TAus (HYV)..... 12            | Black gram (Mashkalai)53    | BT Brinjal 1(Bari brinjal    | Lal Shak ..... 203           | Black berry..... 314         | Bettleleaf ..... 603               |
| T Aus (hybrid)..... 13        | Chickling Vetch(Khesari)54  | 1)... 128                    | Kalmi Shak ..... 204         | Other fruits(lemon like)315  | Other Tobacco like crop604         |
| BAman (local) ..... 14        | Chick pea (Chhola)..... 55  | BT Brinjal 2(Bari brinjal    | Danta Shak..... 205          | Other fruits..... 316        | Cut flower ..... 605               |
| T Aman(local) ..... 15        | Pigeon pea (Aarohor) ... 56 | 2)... 129                    | Kachu Shak ..... 206         | Boroi(Bitter Plum) ..... 317 |                                    |
| T.Aman (HYV) ..... 16         | Field pea (Motor)..... 57   | BT Brinjal 3(Bari brinjal    | Lau Shak ..... 207           | Rose Apple..... 318          | Paddy seedbed ..... 701            |
| T.Aman (hybrid)..... 17       | Soybean (Gori kalai/        | 3)... 130                    | Mula Shak ..... 208          | Wood Apple..... 319          | Tomato seedbed..... 702            |
| Boro(local) ..... 18          | Kali motor) ..... 58        | BT Brinjal 4(Bari brinjal    | Khesari Shak..... 209        | Ambada/Hoq Plum ..... 320    | Bringal seedbed ..... 703          |
| Boro (HYV) ..... 19           | Other Pulses..... 59        | 4)... 131                    | Other green leafy vegetables | Pomegranate ..... 321        | Cauliflower seedbed ... 704        |
| Boro (hybrid)..... 20         |                             | Patal..... 103               | ..... 210                    | Bilimbi ..... 322            | Cabbage seedbed ..... 705          |
| Wheat (local)..... 21         | <b>Oil Seeds</b>            | Okra..... 104                | Potato Leaves..... 211       | Chalta ..... 323             | Kohlrabi seedbed ..... 706         |
| Wheat (HYV) ..... 22          | Sesame..... 61              | Ridge gourd..... 105         | Cabbage ..... 212            | Tamarind(pulp) ..... 324     | Tobacco seedbed ..... 707          |
| Maize..... 23                 | Linseed(tishi)..... 62      | Bitter gourd ..... 106       | Chinese cabbage ..... 213    | Olive(wild)..... 325         | Onion seedbed ..... 708            |
| Barley ..... 24               | Mustard..... 63             | Arum ..... 107               |                              | Coconut/Green Coconut326     | Chili seedbed ..... 709            |
| Job ..... 25                  | Ground nut/peanut ..... 64  | Ash gourd ..... 108          | <b>Fruits</b>                |                              | Other seedbed ..... 710            |
| Cheena..... 26                | Soybean ..... 65            | Cucumber ..... 109           | Banana ..... 301             | <b>Other crops</b>           |                                    |
| Kaun(Italian millet) ..... 27 | Castor (rerri)..... 66      | Carrot ..... 110             | Mango ..... 302              | Potato ..... 411             |                                    |
| Joar(Great millet) ..... 28   | Others Oilseeds..... 67     | Cow pea..... 111             | Pineapple ..... 303          | Sweet potato..... 412        | <b>By Products (Applicable for</b> |
| Bojra(Pearl millet)..... 29   |                             | Snake gourd..... 112         | Jack fruit ..... 304         | Mulberry(Tunt) ..... 413     | <b>Module I only)</b>              |
| Others ..... 30               |                             | Danta ..... 113              | Papaya ..... 305             | Orange flesh sweet potato414 | Jutestick ..... 801                |
| <b>Fiber Crops</b>            | <b>Spices</b>               | Green banana/plantain 114    | Water melon..... 306         |                              | Straw ..... 802                    |
| Dhonche ..... 41              | Chili ..... 71              | Cauliflower..... 115         | Bangi/Phuti/Musk melon307    | Sugurcan ..... 501           | Other byproduct..... 803           |
| Jute ..... 42                 | Onion ..... 72              | Water gourd..... 116         | Litchis ..... 308            | Date..... 502                |                                    |
| Cotton..... 43                | Garlic ..... 73             | Sweet gourd..... 117         | Guava..... 309               | Palm ..... 503               | Other(specify)..... 900            |
| Bamboo ..... 44               | Turmeric ..... 74           | Tomato ..... 116             | Ataa..... 310                | Date Juice..... 504          |                                    |
| Other Fibre ..... 45          | Ginger ..... 75             | Radish..... 119              | Orange ..... 311             | Tea ..... 505                |                                    |
|                               | Dhania/Coriander ..... 76   | Turnip..... 120              |                              |                              |                                    |
|                               | Other spices ..... 77       | Green Papaya ..... 121       |                              |                              |                                    |
|                               |                             | Kakrol..... 122              |                              |                              |                                    |
|                               |                             | Yam Stem..... 123            |                              |                              |                                    |
|                               |                             | Other green Vegetables124    |                              |                              |                                    |
|                               |                             | DrumStick ..... 125          |                              |                              |                                    |
|                               |                             | Bean ..... 126               |                              |                              |                                    |
|                               |                             | Coriander leaf..... 127      |                              |                              |                                    |

Household Number:

| Code 3: Paddy Rice                |                                               | Code 4: Source of seed                      |                                   |
|-----------------------------------|-----------------------------------------------|---------------------------------------------|-----------------------------------|
| Chandina BR-1 (Boro/Aus)..... 1   | Bri Dhan BR-35 (Boro).....34                  | Bri Dhan BR-67saline tolerant (Boro).... 66 | BINA 5 ..... 99                   |
| Mala BR-2 (Boro/Aus).....2        | Bri Dhan BR-36 (Boro) .....35                 | Bri Dhan BR-68 (boro)..... 67               | Bri Hybrid-1(Boro)..... 100       |
| Biplob BR-3 (Aus/Aman).....3      | Bri Dhan BR-37 (Aman).....36                  | Bri Dhan BR-69 weed resistant(Boro).... 68  | Bri Hybrid-2(Boro)..... 101       |
| Brishail BR-4* (Aman) ..... 4     | Bri Dhan BR-38 (Aman).....37                  | Nerica(new rice for africa) ..... 69        | Bri Hybrid-3(Boro)..... 102       |
| Dulavhoge BR-5* (Aman) ..... 5    | Bri Dhan BR-39 (Aman).....38                  | Haridhan..... 70                            | Bri Hybrid-4(Boro Aman) ..... 103 |
| BR-6 (Boro/Aus).....6             | Bri Dhan BR-40 (Aman).....39                  | Asiruddin..... 71                           | Bina 6(Boro/aus)..... 104         |
| Bribalam BR-7 (Boro/Aus) .....7   | Bri Dhan BR-41 (Aman).....40                  | Kajallata..... 72                           | Bina 7(Aman) ..... 105            |
| Asa BR-8 (Boro/Aus).....8         | Bri Dhan BR-42 (Aus) .....41                  | Khude kajal. .... 73                        | Bina 8(Boro/Aus)..... 106         |
| Sufoza BR-9 (Boro/Aus).....9      | Bri Dhan BR-43 (Aus) .....42                  | Miniket..... 74                             | Bina 10 (Boro)..... 107           |
| Progoti BR-10 (Aman)..... 10      | Bri Dhan BR-44 (Aman).....43                  | Paijam. .... 75                             | Bina 11(aman/aus) ..... 108       |
| Mukta BR-11 (Aman) ..... 11       | Bri Dhan BR-45 (Boro) .....44                 | Shapla..... 76                              | Bina 12 (aman) ..... 109          |
| Moyna BR-12 (Boro/Aus)..... 12    | Bri Dhan BR-46 (Aman).....45                  | Bashmati. .... 77                           | Bina 13(aman) ..... 110           |
| Gazi BR-14 (Boro/Aus) ..... 13    | Bri Dhan BR-47 (Boro) .....46                 | Jamaibabu. .... 78                          | Bina 14(boro) ..... 111           |
| Mohini BR-15 (Boro/aus) ..... 14  | Bri Dhan BR-48 (Aus).....47                   | Guti/rajshahi/lalshorna ..... 79            | Bina 15(aman) ..... 112           |
| Shahi Balam BR-16(Boro/Aus)... 15 | Bri Dhan BR-49 (Aman).....48                  | Bhojon(white/coarse)..... 80                | Bina 16(aman) ..... 113           |
| Hasi BR-17 (Boro) ..... 16        | Bri Dhan BR-50 (Banglamoti)(Boro) ....49      | Binni dhan ..... 81                         | Binashail(aman)..... 114          |
| Shahjalal BR-18 (Boro)..... 17    | Bri Dhan BR-51 (Aman).....50                  | Tepi dhan. .... 82                          | Iratom 24(Boro)..... 115          |
| Mongal BR-19 (Boro)..... 18       | Bri Dhan BR-52 (Aman).....51                  | Others..... 888                             | Taj..... 116                      |
| Nizami BR-20 (Aus) ..... 19       | Bri Dhan BR-53 (Aman).....52                  | <b>Hybrid</b>                               | HS..... 117                       |
| Niamat BR-21 (Aus) ..... 20       | Bri Dhan BR-54 (Aman).....53                  | Alok. .... 85                               | Shonali..... 118                  |
| Kiron BR-22* (Aman) ..... 21      | Bri Dhan BR-55 (boro/aus).....54              | Sonar bangla..... 86                        | Surma..... 119                    |
| Dyshary BR-23 ((Aman)..... 22     | Bri Dhan BR-56 (Aman).....55                  | Jagoron ..... 87                            | Padma ..... 120                   |
| Rahmat BR-24 (Aus)..... 23        | Bri Dhan BR-57 (Aman).....56                  | Shakti 1 ..... 88                           | Bijoy ..... 121                   |
| Noya Pajam BR-25 (Aman) ..... 24  | Bri Dhan BR-58 (Boro) .....57                 | Shakti 2 ..... 89                           | Borkot..... 122                   |
| Sraboni BR-26 (Aus).....25        | Bri Dhan BR-59 (Boro) .....58                 | Aloron 1 ..... 90                           | Raja..... 123                     |
| Bri Dhan BR-27 (Aus) ..... 26     | Bri Dhan BR-60 (Boro) .....59                 | Aloron 2 ..... 91                           | Chitra..... 124                   |
| Bri Dhan BR-28 (Boro).....27      | Bri Dhan BR-61 (Boro) .....60                 | Hira ..... 92                               | Shobujmoti ..... 125              |
| Bri Dhan BR-29 (Boro).....28      | Bri Dhan BR-62 Zinc enriched (Aman) .61       | ACI 5 ..... 93                              | Kajol ..... 126                   |
| Bri Dhan BR-30 (Aman) .....29     | Bri Dhan BR-63Shorubalam (Boro) .....62       | Lal Teer ..... 94                           | Rajkumar ..... 127                |
| Bri Dhan BR-31 (Aman).....30      | Bri Dhan BR-64Zinc enriched (Boro)....63      | BINA 1..... 95                              | Robi..... 128                     |
| Bri Dhan BR-32 (Aman).....31      | Bri Dhan BR-65 (Aus).....64                   | BINA 2..... 96                              | Other(specify)..... 999           |
| Bri Dhan BR-33 (Aman) 32          | Bri Dhan BR-66 drought tolerant(Aman) .....65 | BINA 3..... 97                              |                                   |
| Bri Dhan BR-34 (Aman).....33      |                                               | BINA 4..... 98                              |                                   |

| Code 5: Significant characteristics of seeds |                             | Code 6: Did you face any problems with the seeds you purchased? |                                                                | Code 7: Reason of inadequacy |  |
|----------------------------------------------|-----------------------------|-----------------------------------------------------------------|----------------------------------------------------------------|------------------------------|--|
| Grain Yield ..... 1                          | Low input required..... 9   | No problem ..... 1                                              | No market supply..... 1                                        |                              |  |
| Grain Size ..... 2                           | Ease of processing..... 10  | Mixed with other seed ..... 2                                   | Did not save seed ..... 2                                      |                              |  |
| Insect/disease resistant. .... 3             | Market demand..... 11       | Poor germination..... 3                                         | Saved seed got damaged ..... 3                                 |                              |  |
| Flood tolerant ..... 4                       | Good taste ..... 12         | Too expensive ..... 4                                           | Post- flood scarcity of seedling during 2nd plantation ..... 4 |                              |  |
| Saline tolerant ..... 5                      | Nice color..... 13          | Incorrect label ..... 5                                         | Could not get good quality seed.. 5                            |                              |  |
| Drought tolerant ..... 6                     | Good as animal feed..... 14 | Tampered or damaged packaging.... 6                             | Seedling was damaged.....6                                     |                              |  |
| Zinc enriched ..... 7                        | Others (specify) ..... 15   | Shortage of supply ..... 7                                      | Others (specify) ..... 7                                       |                              |  |
| Low labor required 8                         |                             | Others (specify) ..... 8                                        |                                                                |                              |  |











Household Number:

**Module H5: Labor Usage by Gender for Crop Plantation and Harvesting (continued) (Male)**

Recall period: 1<sup>st</sup> December (15<sup>th</sup> Agrahayon) 2017- 30<sup>th</sup> November (14<sup>th</sup> Agrahayon) 2018.

M refers to male labor; F refers to female labor. Include adult and child labor. Round hours to the whole number. Report “0” only if no labor has been used. For e.g. if plot is weeded for 15 min report 1 hour and not “0”.

| Plot ID | Crop Code* | Pesticide application |        |                              |                 |        |                              |                 |        | Weeding |                              |                 |         |                              |                 |         |        | Irrigation (channel maintenance etc.) |                 |        |                              |                 |        |        |                              | Harvest         |        |                              |                 |        |         |        |   |
|---------|------------|-----------------------|--------|------------------------------|-----------------|--------|------------------------------|-----------------|--------|---------|------------------------------|-----------------|---------|------------------------------|-----------------|---------|--------|---------------------------------------|-----------------|--------|------------------------------|-----------------|--------|--------|------------------------------|-----------------|--------|------------------------------|-----------------|--------|---------|--------|---|
|         |            | Family                |        | Hired                        |                 |        |                              |                 |        | Family  |                              | Hired           |         |                              |                 |         |        | Family                                |                 | Hired  |                              |                 |        |        |                              | Family          |        | Hired                        |                 |        |         |        |   |
|         |            | Hr                    | Hours  | Where were labors hired from | Total cost (Tk) | Hours  | Where were labors hired from | Total cost (Tk) | Hr     | Hours   | Where were labors hired from | Total cost (Tk) | Hours   | Where were labors hired from | Total cost (Tk) | Hr      | Hours  | Where were labors hired from          | Total cost (Tk) | Hours  | Where were labors hired from | Total cost (Tk) | Hr     | Hours  | Where were labors hired from | Total cost (Tk) | Hours  | Where were labors hired from | Total cost (Tk) |        |         |        |   |
| Code 1  |            | M                     | F      | M                            | M               | M      | F                            | F               | F      | M       | F                            | M               | M       | M                            | F               | F       | F      | M                                     | F               | M      | M                            | M               | F      | F      | F                            | M               | F      | M                            | M               | M      | F       | F      | F |
| Plot    | Crop Code  | H5_2_5                | H5_2_6 | H5_2_7                       | H5_27_a         | H5_2_8 | H5_2_9                       | H5_29_a         | H5_3_0 | H5_3_1  | H5_3_2                       | H5_3_3          | H5_33_a | H5_3_4                       | H5_3_5          | H5_35_a | H5_3_6 | H5_3_7                                | H5_3_8          | H5_3_9 | H5_39_a                      | H5_4_0          | H5_4_1 | H5_4_2 | H5_4_3                       | H5_4_4          | H5_4_5 | H5_45_a                      | H5_4_6          | H5_4_7 | H5_47_a | H5_4_8 |   |



Household Number:

**Module H6: Post Harvest Labor, Animal and Tools/ Machinery Usage (continued) (Male)**

Report for all Crop cultivated during 1<sup>st</sup> December (15<sup>th</sup> Agrahayon) 2017- 30<sup>th</sup> November (14<sup>th</sup> Agrahayon) 2018.

The questions in this section are at crop level and NOT plot level.

M refers to male labor; F refers to female labor. Include adult and child labor.

Round hours to the whole number only. Report “0” only if no labor has been used. For e.g. if plot is weeded for 15 min report 1 hour and not “0”.

| Crop      | Drying crop |       |       |                 |       |                 | Sorting |       |       |                 |       |                 | Packaging |       |       |                 |       |                 |
|-----------|-------------|-------|-------|-----------------|-------|-----------------|---------|-------|-------|-----------------|-------|-----------------|-----------|-------|-------|-----------------|-------|-----------------|
|           | Family      |       | Hired |                 |       |                 | Family  |       | Hired |                 |       |                 | Family    |       | Hired |                 |       |                 |
|           | Hours       |       | Hours | Total cost (Tk) | Hours | Total cost (Tk) | Hours   |       | Hours | Total cost (Tk) | Hours | Total cost (Tk) | Hours     |       | Hours | Total cost (Tk) | Hours | Total cost (Tk) |
| Code 1    | M           | F     | M     | M               | F     | F               | M       | F     | M     | M               | F     | F               | M         | F     | M     | M               | F     | F               |
| Crop Code | H6_16       | H6_17 | H6_18 | H6_19           | H6_20 | H6_21           | H6_22   | H6_23 | H6_24 | H6_25           | H6_26 | H6_27           | H6_28     | H6_29 | H6_30 | H6_31           | H6_32 | H6_33           |
|           |             |       |       |                 |       |                 |         |       |       |                 |       |                 |           |       |       |                 |       |                 |
|           |             |       |       |                 |       |                 |         |       |       |                 |       |                 |           |       |       |                 |       |                 |
|           |             |       |       |                 |       |                 |         |       |       |                 |       |                 |           |       |       |                 |       |                 |
|           |             |       |       |                 |       |                 |         |       |       |                 |       |                 |           |       |       |                 |       |                 |
|           |             |       |       |                 |       |                 |         |       |       |                 |       |                 |           |       |       |                 |       |                 |
|           |             |       |       |                 |       |                 |         |       |       |                 |       |                 |           |       |       |                 |       |                 |
|           |             |       |       |                 |       |                 |         |       |       |                 |       |                 |           |       |       |                 |       |                 |
|           |             |       |       |                 |       |                 |         |       |       |                 |       |                 |           |       |       |                 |       |                 |
|           |             |       |       |                 |       |                 |         |       |       |                 |       |                 |           |       |       |                 |       |                 |
|           |             |       |       |                 |       |                 |         |       |       |                 |       |                 |           |       |       |                 |       |                 |
|           |             |       |       |                 |       |                 |         |       |       |                 |       |                 |           |       |       |                 |       |                 |
|           |             |       |       |                 |       |                 |         |       |       |                 |       |                 |           |       |       |                 |       |                 |
|           |             |       |       |                 |       |                 |         |       |       |                 |       |                 |           |       |       |                 |       |                 |

|                                                                 |
|-----------------------------------------------------------------|
| <b>Code 2:</b>                                                  |
| Yes, I used my own/ I used someone else’s free of charge..... 1 |
| Yes, I rented it and then used it ..... 2                       |
| No, I have not used it..... 3                                   |

Household Number:

**Module H7: Fertilizer, Seed and Pesticides price in different crop seasons (Male)**

Report for the three seasons during 1<sup>st</sup> December (15<sup>th</sup> Agrahayon) 2017- 30<sup>th</sup> November (14<sup>th</sup> Agrahayon) 2018.

| Sl no | Name of Fertilizer/ Pesticide | Price of Fertilizer/Seed                    |                  |                                                |                  |                                              |                  | Was there any inadequacy of fertilizer in the last 12 months?<br>Yes .... 1<br>No..... 2>> H7_11 | Record the code for the month in which there was an inadequacy or insufficiency of fertilizer |        | What do you think was the reason for this inadequacy? |        | Was there any problems of fertilizer? |
|-------|-------------------------------|---------------------------------------------|------------------|------------------------------------------------|------------------|----------------------------------------------|------------------|--------------------------------------------------------------------------------------------------|-----------------------------------------------------------------------------------------------|--------|-------------------------------------------------------|--------|---------------------------------------|
|       |                               | Rabi                                        |                  | Kharif 1                                       |                  | Kharif 2                                     |                  |                                                                                                  |                                                                                               |        |                                                       |        |                                       |
|       |                               | Did you purchase?<br>Yes... 1<br>No 2→H7_04 | Avg price per Kg | Did you purchase?<br>Yes .. 1<br>No .. 2→H7_06 | Avg price per Kg | Did you purchase?<br>Yes ... 1<br>No 2→H7_08 | Avg price per Kg |                                                                                                  |                                                                                               |        |                                                       |        |                                       |
|       | Code ↑                        | Tk/Kg                                       | Code ↑           | Tk/Kg                                          | Code ↑           | Tk/Kg                                        | Code ↑           | Code 1                                                                                           |                                                                                               | Code 2 |                                                       |        |                                       |
| H7_01 |                               | H7_02                                       | H7_03            | H7_04                                          | H7_05            | H7_06                                        | H7_07            | H7_08                                                                                            | H7_09a                                                                                        | H7_09b | H7_10a                                                | H7_10b | H7_11                                 |
| 1     | Urea                          |                                             |                  |                                                |                  |                                              |                  |                                                                                                  |                                                                                               |        |                                                       |        |                                       |
| 10    | Briquette Urea                |                                             |                  |                                                |                  |                                              |                  |                                                                                                  |                                                                                               |        |                                                       |        |                                       |
| 21    | TSP /                         |                                             |                  |                                                |                  |                                              |                  |                                                                                                  |                                                                                               |        |                                                       |        |                                       |
| 22    | SSP                           |                                             |                  |                                                |                  |                                              |                  |                                                                                                  |                                                                                               |        |                                                       |        |                                       |
| 31    | DAP                           |                                             |                  |                                                |                  |                                              |                  |                                                                                                  |                                                                                               |        |                                                       |        |                                       |
| 32    | /MAP                          |                                             |                  |                                                |                  |                                              |                  |                                                                                                  |                                                                                               |        |                                                       |        |                                       |
| 4     | MP                            |                                             |                  |                                                |                  |                                              |                  |                                                                                                  |                                                                                               |        |                                                       |        |                                       |
| 5     | Zinc                          |                                             |                  |                                                |                  |                                              |                  |                                                                                                  |                                                                                               |        |                                                       |        |                                       |
| 6     | Ammonia                       |                                             |                  |                                                |                  |                                              |                  |                                                                                                  |                                                                                               |        |                                                       |        |                                       |
| 7     | Gypsum                        |                                             |                  |                                                |                  |                                              |                  |                                                                                                  |                                                                                               |        |                                                       |        |                                       |
| 8     | NPKS                          |                                             |                  |                                                |                  |                                              |                  |                                                                                                  |                                                                                               |        |                                                       |        |                                       |
| 9     | Calcium /Lime                 |                                             |                  |                                                |                  |                                              |                  |                                                                                                  |                                                                                               |        |                                                       |        |                                       |
| 91    | Lime                          |                                             |                  |                                                |                  |                                              |                  |                                                                                                  |                                                                                               |        |                                                       |        |                                       |
| 92    | Calcium                       |                                             |                  |                                                |                  |                                              |                  |                                                                                                  |                                                                                               |        |                                                       |        |                                       |
| 99    | Without cultivation           |                                             |                  |                                                |                  |                                              |                  |                                                                                                  |                                                                                               |        |                                                       |        |                                       |

| Code 1: Month                                                  | Code 2: Cause of Inadequacy                                                                                                                                           | Code 3: Fertilizer problem                                                                                                                                                    |
|----------------------------------------------------------------|-----------------------------------------------------------------------------------------------------------------------------------------------------------------------|-------------------------------------------------------------------------------------------------------------------------------------------------------------------------------|
| January..... 1<br>February..... 2<br>.....<br>December..... 12 | Was not readily available in the market..... 1<br>Dealer hoarding..... 2<br>Insufficient Supply..... 3<br>No dealer nearby ..... 4<br>Smuggling of fertilizer ..... 5 | Others..... 6<br>No problem....1<br>Adultrated with salt...2<br>Adultrated with soil.....3<br>Adultrated with other things...4<br>Clotted...5<br>Productivity was less .....6 |



Household Number:

**Module H7\_A: Labor Cost: For sowing seed, weed control, irrigation and harvesting crops. (Male)**

Report for the three seasons during 1<sup>st</sup> December (15<sup>th</sup> Agrahayon) 2017- 30<sup>th</sup> November (14<sup>th</sup> Agrahayon) 2018.

| Sl. No. | Different Purposes of Labor Use                     | Cost of Labor (Male)               |             |                                    |                             |             |                                    |                                     |             |                                    | Cost of Labor (Female)             |             |                                    |                                   |             |                                    |                                      |             |                                    |
|---------|-----------------------------------------------------|------------------------------------|-------------|------------------------------------|-----------------------------|-------------|------------------------------------|-------------------------------------|-------------|------------------------------------|------------------------------------|-------------|------------------------------------|-----------------------------------|-------------|------------------------------------|--------------------------------------|-------------|------------------------------------|
|         |                                                     | Rabi (Boro)                        |             |                                    | Kharif 1 (Aus)              |             |                                    | Kharif 2 (Aman)                     |             |                                    | Rabi (Boro)                        |             |                                    | Kharif 1 (Aus)                    |             |                                    | Kharif 2 (Aman)                      |             |                                    |
|         |                                                     | Did you hire labor?                | Daily Rate  | Daily Payment in kind (incl. food) | Did you hire labor?         | Daily Rate  | Daily Payment in kind (incl. food) | Did you hire labor?                 | Daily Rate  | Daily payment in kind (incl. food) | Did you hire labor?                | Daily Rate  | Daily Payment in kind (incl. food) | Did you hire labor?               | Daily Rate  | Daily payment in kind (incl. food) | Did you hire labor?                  | Daily Rate  | Daily payment in kind (incl. food) |
|         |                                                     | Yes..... 1<br>No..... 2><br>H7a_05 |             |                                    | Yes . 1<br>No. 2><br>H7a_08 |             |                                    | Yes..... 1<br>No..... 2<br>> H7a_11 |             |                                    | Yes .... 1<br>No..... 2><br>H7a_14 |             |                                    | Yes.....1<br>No..... 2><br>H7a_17 |             |                                    | Yes .... 1<br>No..... 2><br>next row |             |                                    |
|         | Code ↑                                              | Tk                                 | Value in Tk | Code ↑                             | Tk                          | Value in Tk | Code ↑                             | Tk                                  | Value in Tk | Code ↑                             | Tk                                 | Value in Tk | Code ↑                             | Tk                                | Value in Tk | Code ↑                             | Tk                                   | Value in Tk |                                    |
|         | H7a_01                                              | H7a_02                             | H7a_03      | H7a_04                             | H7a_05                      | H7a_06      | H7a_07                             | H7a_08                              | H7a_09      | H7a_10                             | H7a_11                             | H7a_12      | H7a_13                             | H7a_14                            | H7a_15      | H7a_16                             | H7a_17                               | H7a_18      | H7a_19                             |
| 1       | Labor needed for land preparation                   |                                    |             |                                    |                             |             |                                    |                                     |             |                                    |                                    |             |                                    |                                   |             |                                    |                                      |             |                                    |
| 2       | Labor needed for sowing seeds                       |                                    |             |                                    |                             |             |                                    |                                     |             |                                    |                                    |             |                                    |                                   |             |                                    |                                      |             |                                    |
| 3       | Labor needed for broadcasting seeds                 |                                    |             |                                    |                             |             |                                    |                                     |             |                                    |                                    |             |                                    |                                   |             |                                    |                                      |             |                                    |
| 4       | Labor needed for weeding                            |                                    |             |                                    |                             |             |                                    |                                     |             |                                    |                                    |             |                                    |                                   |             |                                    |                                      |             |                                    |
| 5       | Labor needed for manual irrigation                  |                                    |             |                                    |                             |             |                                    |                                     |             |                                    |                                    |             |                                    |                                   |             |                                    |                                      |             |                                    |
| 6       | Labor needed for collecting crops                   |                                    |             |                                    |                             |             |                                    |                                     |             |                                    |                                    |             |                                    |                                   |             |                                    |                                      |             |                                    |
| 7       | Labor needed for applying briquette urea fertilizer |                                    |             |                                    |                             |             |                                    |                                     |             |                                    |                                    |             |                                    |                                   |             |                                    |                                      |             |                                    |
| 8       | Labor needed for applying other fertilizer          |                                    |             |                                    |                             |             |                                    |                                     |             |                                    |                                    |             |                                    |                                   |             |                                    |                                      |             |                                    |
| 9       | Labor needed for threshing                          |                                    |             |                                    |                             |             |                                    |                                     |             |                                    |                                    |             |                                    |                                   |             |                                    |                                      |             |                                    |

**Module H8: Location of purchase/rent of Animals, Tool/Machineries, Agricultural labor, Fertilizer, Pesticides etc. (Male)**

Recall period: 1<sup>st</sup> December (15<sup>th</sup> Agrahayon) 2017- 30<sup>th</sup> November (14<sup>th</sup> Agrahayon) 2018.

| Sl No. | Question                                                                 | Response | Response code                                 |
|--------|--------------------------------------------------------------------------|----------|-----------------------------------------------|
| H8_01  | Where did you rent animal used in land preparation and threshing from?   |          | Farm gate (home).....1                        |
| H8_02  | Where did you rent tools and machineries used in crop cultivation from?  |          | Village market (within own village).....2     |
| H8_03  | Where did you hire agricultural labor from?                              |          | Village market (outside of own village).....3 |
| H8_04  | Where did you purchase fertilizer/pesticides/insecticide/herbicide from? |          | Town market.....4                             |
|        |                                                                          |          | Other (specify) .....5                        |
|        |                                                                          |          | Did not rent and did not buy .....9           |

Module End Time: 

|      |  |  |        |  |
|------|--|--|--------|--|
| Hour |  |  | Minute |  |
|------|--|--|--------|--|



Household Number:

| Code 1: Reason for loss of output | Code 2: Point of Sale                       |
|-----------------------------------|---------------------------------------------|
| Flood/rain ..... 1                | Farm gate (home) ..... 1                    |
| Pest attack ..... 2               | Village market (within own village) ..... 2 |
| Infested by rats ..... 3          | Village Market (outside own village) ... 3  |
| Drought ..... 4                   | Town Market ..... 4                         |
| Storm/cyclone ..... 5             | Other (specify) ..... 5                     |
| Other(specify) ..... 6            | Neither bought nor rented in ..... 9        |

**Module I2: Food grain stock and Storage capacity (Male)**

For last 1 year, December 1 2017 to November 30, 2018

| Food grain                                                                                     | End of Month food grain stock |                                |          |          |          |          |           |           |             |             |          |          |          | Maximum amount food grain storage capacity of the household |
|------------------------------------------------------------------------------------------------|-------------------------------|--------------------------------|----------|----------|----------|----------|-----------|-----------|-------------|-------------|----------|----------|----------|-------------------------------------------------------------|
|                                                                                                | Dec 2017                      | Jan 2018                       | Feb 2018 | Mar 2018 | Apr 2018 | May 2018 | June 2018 | July 2018 | August 2018 | Sep 2018    | Oct 2018 | Nov 2018 |          |                                                             |
|                                                                                                | kg                            | kg                             | kg       | kg       | kg       | kg       | kg        | kg        | kg          | kg          | kg       | kg       | kg       | kg                                                          |
| I2_01                                                                                          | I2_02                         | I2_03                          | I2_04    | I2_05    | I2_06    | I2_07    | I2_08     | I2_09     | I2_10       | I2_11       | I2_12    | I2_13    | I2_14    |                                                             |
| Paddy                                                                                          |                               |                                |          |          |          |          |           |           |             |             |          |          |          |                                                             |
| Rice                                                                                           |                               |                                |          |          |          |          |           |           |             |             |          |          |          |                                                             |
| Wheat                                                                                          |                               |                                |          |          |          |          |           |           |             |             |          |          |          |                                                             |
| Have you milled paddy in past one year for your own consumption?<br>yes=1; No=2>> next machine |                               | Dec 2017                       | Jan 2018 | Feb 2018 | Mar 2018 | Apr 2018 | May 2018  | June 2018 | July 2018   | August 2018 | Sep 2018 | Oct 2018 | Nov 2018 |                                                             |
| Huller mill                                                                                    | <input type="text"/>          | Amount of paddy/rice processed |          |          |          |          |           |           |             |             |          |          |          |                                                             |
|                                                                                                |                               | Amount of rice received        |          |          |          |          |           |           |             |             |          |          |          |                                                             |
| Husking mill                                                                                   | <input type="text"/>          | Amount of paddy/rice processed |          |          |          |          |           |           |             |             |          |          |          |                                                             |
|                                                                                                |                               | Amount of rice received        |          |          |          |          |           |           |             |             |          |          |          |                                                             |
| Semi-automatic mill                                                                            | <input type="text"/>          | Amount of paddy/rice processed |          |          |          |          |           |           |             |             |          |          |          |                                                             |
|                                                                                                |                               | Amount of rice received        |          |          |          |          |           |           |             |             |          |          |          |                                                             |

Household Number:

**Module I2a: Food grain stock and Storage capacity (continued) (Male)**

| Crop code | Kharif 2 (Aman)                                                                    |           |               |                                                                                   |           |               |                                                              |                                                                    | Kharif 1 (Aus)                                                                     |           |               |                                                                                   |           |               |                                                              |                                                                    | Robi (Boro)                                                                        |           |               |                                                                                       |           |               |                                                              |                                                                    |
|-----------|------------------------------------------------------------------------------------|-----------|---------------|-----------------------------------------------------------------------------------|-----------|---------------|--------------------------------------------------------------|--------------------------------------------------------------------|------------------------------------------------------------------------------------|-----------|---------------|-----------------------------------------------------------------------------------|-----------|---------------|--------------------------------------------------------------|--------------------------------------------------------------------|------------------------------------------------------------------------------------|-----------|---------------|---------------------------------------------------------------------------------------|-----------|---------------|--------------------------------------------------------------|--------------------------------------------------------------------|
|           | First sale after how many days of production?<br>Did not produce/sold....99>>I2_18 | Qty sold? | Price of sale | Last sale after how many days of production?<br>Did not produce/sold....99>>I2_23 | Qty sold? | Price of sale | Till now, what volume/qty. of your production have you sold? | What is the current quantity of your stock? (As of Date of survey) | First sale after how many days of production?<br>Did not produce/sold....99>>I2_26 | Qty sold? | Price of sale | Last sale after how many days of production?<br>Did not produce/sold....99>>I2_31 | Qty sold? | Price of sale | Till now, what volume/qty. of your production have you sold? | What is the current quantity of your stock? (As of Date of survey) | First sale after how many days of production?<br>Did not produce/sold....99>>I2_34 | Qty sold? | Price of sale | Last sale after how many days of production?<br>Did not produce/sold....99>>next crop | Qty sold? | Price of sale | Till now, what volume/qty. of your production have you sold? | What is the current quantity of your stock? (As of Date of survey) |
| Crop      | day                                                                                | kg        | Tk/kg         | kg                                                                                | kg        | Tk/kg         | kg                                                           | kg                                                                 | day                                                                                | kg        | Tk/kg         | kg                                                                                | kg        | Tk/kg         | kg                                                           | kg                                                                 | day                                                                                | kg        | Tk/kg         | kg                                                                                    | kg        | Tk/kg         | kg                                                           | kg                                                                 |
|           | I2_15                                                                              | I2_16     | I2_17         | I2_18                                                                             | I2_19     | I2_20         | I2_21                                                        | I2_22                                                              | I2_23                                                                              | I2_24     | I2_25         | I2_26                                                                             | I2_27     | I2_28         | I2_29                                                        | I2_30                                                              | I2_31                                                                              | I2_32     | I2_33         | I2_34                                                                                 | I2_35     | I2_36         | I2_37                                                        | I2_38                                                              |
| Paddy     |                                                                                    |           |               |                                                                                   |           |               |                                                              |                                                                    |                                                                                    |           |               |                                                                                   |           |               |                                                              |                                                                    |                                                                                    |           |               |                                                                                       |           |               |                                                              |                                                                    |
| Rice      |                                                                                    |           |               |                                                                                   |           |               |                                                              |                                                                    |                                                                                    |           |               |                                                                                   |           |               |                                                              |                                                                    |                                                                                    |           |               |                                                                                       |           |               |                                                              |                                                                    |
| Wheat     |                                                                                    |           |               |                                                                                   |           |               |                                                              |                                                                    |                                                                                    |           |               |                                                                                   |           |               |                                                              |                                                                    |                                                                                    |           |               |                                                                                       |           |               |                                                              |                                                                    |



Household Number:

**Module I4: Seedling/seedbed production cost (Male)**

For last 1 year, December 1 2017 to November 30, 2018

I4\_1 Have you produced own seedling/seedbed for any crop last year? Yes .....1 No.....2 >> Next Module

| Name of each crops for which you produced seedlings |           |                |                       |              | Season<br>Aman (Kharif 2)...1<br>Aus (Kharif1)....2<br>Boro (Rabi)...3<br>Annual....4 | What is the area of reference for the seedbeds ? | Quantity of seed used for seedbed to produce seedling | Main source of seed<br>If produced seedling, write '11' in I4_05a, and mention seed source in the next column | Price per kg of seed used?<br>If seed source code is 1 or 2, bring approximate cost of seed | In your opinion, what are the most important traits in this seed? | Did you face any problem with the seed/seedling you purchased?<br>If ans is 1>>next plot | Reason of inadequacy | Did you sell any seedlings or give to others?<br>Yes... 1<br>No.... 2>>I4_11 | If yes, what portion of seedling you sold or gave to other? | Total area planted with own produced seedlings? | Total expenditure of other inputs used in the seed bed |          |                      |       |                     |       |            |             |       |
|-----------------------------------------------------|-----------|----------------|-----------------------|--------------|---------------------------------------------------------------------------------------|--------------------------------------------------|-------------------------------------------------------|---------------------------------------------------------------------------------------------------------------|---------------------------------------------------------------------------------------------|-------------------------------------------------------------------|------------------------------------------------------------------------------------------|----------------------|------------------------------------------------------------------------------|-------------------------------------------------------------|-------------------------------------------------|--------------------------------------------------------|----------|----------------------|-------|---------------------|-------|------------|-------------|-------|
| Plot ID                                             | Crop name | Code1 CropCode | If rice, variety name | Variety Code | Code ↑                                                                                | decimals                                         | Kg                                                    | Code 2                                                                                                        |                                                                                             | Price/Kg                                                          | Code3                                                                                    |                      | Code4                                                                        | Code5                                                       | Code ↑                                          | %                                                      | decimals | Chemical fertilizers |       | Organic fertilizers |       | Pesticides | Hired labor | Other |
|                                                     |           | I4_01          |                       | I4_02        | I4_03                                                                                 | I4_04                                            | I4_05                                                 | I4_06a                                                                                                        | I4_06b                                                                                      | I4_07                                                             | I4_08a                                                                                   | I4_08b               | I4_09                                                                        | I4_10                                                       | I4_11                                           | I4_12                                                  | I4_13    | I4_14                | I4_15 | I4_16               | I4_17 | I4_18      | I4_19       | I4_20 |
|                                                     |           |                |                       |              |                                                                                       |                                                  |                                                       |                                                                                                               |                                                                                             |                                                                   |                                                                                          |                      |                                                                              |                                                             |                                                 |                                                        |          |                      |       |                     |       |            |             |       |
|                                                     |           |                |                       |              |                                                                                       |                                                  |                                                       |                                                                                                               |                                                                                             |                                                                   |                                                                                          |                      |                                                                              |                                                             |                                                 |                                                        |          |                      |       |                     |       |            |             |       |
|                                                     |           |                |                       |              |                                                                                       |                                                  |                                                       |                                                                                                               |                                                                                             |                                                                   |                                                                                          |                      |                                                                              |                                                             |                                                 |                                                        |          |                      |       |                     |       |            |             |       |
|                                                     |           |                |                       |              |                                                                                       |                                                  |                                                       |                                                                                                               |                                                                                             |                                                                   |                                                                                          |                      |                                                                              |                                                             |                                                 |                                                        |          |                      |       |                     |       |            |             |       |

| Code 2: Source of seed       |                           | Code 3: Significant characteristics of seed |                            | Code 4: Did you face any problems with the seed you purchased? |                                                               | Code 5: reason of inadequacy |  |
|------------------------------|---------------------------|---------------------------------------------|----------------------------|----------------------------------------------------------------|---------------------------------------------------------------|------------------------------|--|
| Own/Saved seeds ..... 1      | Market ..... 7            | Grain Yield ..... 1                         | Low input required ... 9   | No problem ..... 1                                             | No market supply ..... 1                                      |                              |  |
| Gift from others..... 2      | Other farmer..... 8       | Grain Size ..... 2                          | Ease of processing .... 10 | Mixed with other seed..... 2                                   | Did not save seed..... 2                                      |                              |  |
| BADC outlet (Govt.)..... 3   | Bought from farm .... 9   | Insect/disease resistant.... 3              | Market demand..... 11      | Poor germination..... 3                                        | Saved seed got damaged..... 3                                 |                              |  |
| Bought from BRAC ..... 4     | Bought seedling..... 10   | Flood tolerant..... 4                       | Good taste ..... 12        | Too expensive ..... 4                                          | Post- flood scarcity of seedling during 2nd plantation..... 4 |                              |  |
| Bought from other NGO .... 5 | Produced seedling .... 11 | Saline tolerant ..... 5                     | Nice color ..... 13        | Incorrect label ..... 5                                        | Could not get good quality seed.... 5                         |                              |  |
| personal shop/dealer..... 6  |                           | Drought tolerant..... 6                     | Good as animal feed . 14   | Tampered or damaged packaging.... 6                            | Shortage of supply ..... 6                                    |                              |  |
|                              |                           | Zinc enriched ..... 7                       | Others (specify)..... 15   | Shortage of supply ..... 7                                     | New seedling was damaged..... 6                               |                              |  |
|                              |                           | Low labor required..... 8                   |                            | Others (specify) ..... 8                                       | others (specify)..... 7                                       |                              |  |

Consent  
Yes=1 No=2

MID

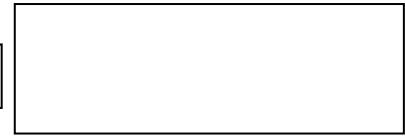

Household Number:

**Module ha: Agricultural Technologies - paddy rice (Male)**

For last 1 year, December 1 2017 to November 30, 2018.

Interviewer: (1) If no member of any household has not cultivated paddy in last 1 year, go to the next module.

(2) Check ALL the answers of this section with module H

| Q. No. | Technology Questions                                                                                                      | Response                                                             | Response codes                                                                                                                                                                                                                                                                                                                                     |
|--------|---------------------------------------------------------------------------------------------------------------------------|----------------------------------------------------------------------|----------------------------------------------------------------------------------------------------------------------------------------------------------------------------------------------------------------------------------------------------------------------------------------------------------------------------------------------------|
| HA_01  | What kind of land preparation did you use for the paddy rice you planted in the past year?<br>[Multiple Answers possible] | <input type="text"/><br><input type="text"/><br><input type="text"/> | None ..... 1>>HA_06<br>ZERO TILLAGE ..... 2<br>Ploughing ..... 3<br>Hand weeding ..... 4<br>Others(specify)..... 96                                                                                                                                                                                                                                |
| HA_02  | Check HA_01: did respondent use zero tillage methods to prepare the land?                                                 | <input type="text"/>                                                 | yes ..... 1<br>no ..... 2>>HA_04                                                                                                                                                                                                                                                                                                                   |
| HA_03  | What kind of zero tillage system did you use on the land where you planted paddy rice?<br>[Multiple Answers possible]     | <input type="text"/><br><input type="text"/><br><input type="text"/> | Slash And Plant ..... 1<br>Burn And Plant..... 2<br>Herbicide And Plant ..... 3<br>Others(specify)..... 96                                                                                                                                                                                                                                         |
| HA_04  | Check HA_01: did respondent use ploughing methods to prepare the land?                                                    | <input type="text"/>                                                 | yes ..... 1<br>no ..... 2>>HA_06                                                                                                                                                                                                                                                                                                                   |
| HA_05  | What did you use for ploughing the land where you planted paddy rice<br>[Multiple Answers Possible]                       | <input type="text"/> <input type="text"/> <input type="text"/>       | HAND TILLAGE (HOE) ..... 1<br>ANIMAL TRACTION..... 2<br>MOTORIZED TILLER ..... 3<br>TRACTOR ..... 4<br>OTHER (SPECIFY)..... 96                                                                                                                                                                                                                     |
| HA_06  | What was your main source of rice seed?                                                                                   | <input type="text"/>                                                 | OWN SAVED SEED, SEED FROM FRIEND/<br>RELATIVE (NOT PURCHASED)..... 1<br>RELATIVE (NOT PURCHASED)..... 2<br>Prchased from market (non-Ag dealer)..... 3<br>Purchased from ag-dealer with cash..... 4<br>Purchased from ag-dealer with voucher ..... 5<br>Aid Distribution ..... 6<br>Subsidy card ..... 7<br>NGO ..... 8<br>OTHER (SPECIFY)..... 96 |

Household Number:

| Q. No. | Technology Questions                                                                                                                                                                                                       | Response                                                                            | Response codes                                                                                                                       |
|--------|----------------------------------------------------------------------------------------------------------------------------------------------------------------------------------------------------------------------------|-------------------------------------------------------------------------------------|--------------------------------------------------------------------------------------------------------------------------------------|
| HA_07  | What type of seed did you plant in the past year?<br>[Multiple answer possible]                                                                                                                                            | <input type="text"/> <input type="text"/> <input type="text"/> <input type="text"/> | Local (broadcast)..... 1<br>Local (transplanted) ..... 2<br>HYV ..... 3<br>Hybrid ..... 4                                            |
| HA_08  | CHECK HA_07: DID RESPONDENT SELECT MORE THAN ONE TYPE OF SEED?                                                                                                                                                             | <input type="text"/>                                                                | Yes ..... 1<br>No..... 2>>HA_10                                                                                                      |
| HA_09  | Would you say that most of the rice seed you planted was traditional, local seed, HYV or hybrid?                                                                                                                           | <input type="text"/>                                                                | MOSTLY TRADITIONAL/LOCAL SEED 1<br>MOSTLY HYV/hybrid ..... 2<br>Half was local and rest half was HYV/hybrid 3<br>Do not know ..... 8 |
| HA_10  | When decisions are made regarding what kind of rice seed to plant, who is it that normally takes the decision?<br>[MULTIPLE RESPONSE]<br><b>Record multiple responses only when there are more than one decision-maker</b> | <input type="text"/><br><input type="text"/><br><input type="text"/>                | self..... 1<br>spouse..... 2<br>other household member ..... 3<br>other non-household member..... 4                                  |
| HA_11  | Did you grow your rice crop: To provide food for the household?<br>To be sold or traded in the market?<br>Both for food and for the market?                                                                                | <input type="text"/>                                                                | household consumption only..... 1<br>selling only ..... 2<br>both for household consumption and selling 3<br>others(specify)..... 96 |
| HA_12  | Did you sow rice seed directly in the paddy, did you plant seedlings in your rice paddy, or did you both sow seed directly and plant some seedlings?                                                                       | <input type="text"/>                                                                | SEED SOWN DIRECTLY ONLY 1>>HA_16<br>ONLY SEEDLINGS PLANTED ..... 2<br>SOME SEED SOWN, SOME SEEDLINGS 3                               |
| HA_13  | Did you start your own seedlings, or did you purchase them?                                                                                                                                                                | <input type="text"/>                                                                | STARTED OWN SEEDLINGS.. 1>>HA_15<br>PURCHASED SEEDLINGS ..... 2<br>BOTH STARTED OWN SEEDLING AND PURCHASED ..... 3                   |
| HA_14  | Was the nursery where you purchased the rice seedlings a registered or certified nursery?                                                                                                                                  | <input type="text"/>                                                                | yes...1 No.....2                                                                                                                     |
| HA_15  | Check Ha_12: DID THE FARMER PLANT ONLY SEEDLINGS (RESPONSE 2)?                                                                                                                                                             | <input type="text"/>                                                                | YES, ONLY SEEDLINGS PLANTED 1>>HA_17<br>NO, SOME SEEDS SOWN DIRECTLY ..... 2                                                         |
| HA_16  | Some farmers plant paddy rice seeds in rows and some randomly broadcast their paddy rice seeds. How did you plant paddy rice seeds?                                                                                        | <input type="text"/>                                                                | IN ROWS ..... 1<br>RANDOMLY BROADCAST ..... 2<br>SOME IN ROWS AND SOME RANDOMLY BROADCAST ..... 3                                    |
| HA_17  | Some farmers plant paddy rice alone and some plant their rice along with other crops growing in the same plot. How did you plant your rice?                                                                                | <input type="text"/>                                                                | ALONE ..... 1>>HA_19<br>WITH OTHER CROPS ..... 2                                                                                     |



Household Number:

| Q. No. | Technology Questions                                                                                                                                                      | Response                                                             |                      |                      | Response codes                                                                                                                                           |
|--------|---------------------------------------------------------------------------------------------------------------------------------------------------------------------------|----------------------------------------------------------------------|----------------------|----------------------|----------------------------------------------------------------------------------------------------------------------------------------------------------|
|        |                                                                                                                                                                           | CROP- 1                                                              | CROP - 2             | CROP- 3              |                                                                                                                                                          |
| HA_18  | What other crops did you plant in the same plot with the paddy rice?<br>SELECT THE NAME OF THE CROP(S) FROM THE DROP DOWN LIST                                            | <input type="text"/>                                                 | <input type="text"/> | <input type="text"/> | [CROP CODE]                                                                                                                                              |
| HA_19  | Do you raise fish in your rice paddy?                                                                                                                                     | <input type="text"/>                                                 |                      |                      | yes...1 No.....2>>HA_21                                                                                                                                  |
| HA_20  | Why do you raise fish in your rice paddy?<br>[Multiple response]                                                                                                          | <input type="text"/>                                                 | <input type="text"/> | <input type="text"/> | For large profit ..... 1<br>Fish feed is less expensive ..... 2<br>Weeds of the paddy field can be used for fish feed ..... 3<br>Others(specify)..... 96 |
| HA_21  | When decisions are made regarding whether or not to plant other crops in the same plot with your rice, who is it that normally takes the decision?<br>[MULTIPLE RESPONSE] | <input type="text"/>                                                 | <input type="text"/> | <input type="text"/> | self..... 1<br>spouse..... 2<br>other hh member ..... 3<br>other non-hh member ..... 4                                                                   |
| HA_22  | Over the past two planting seasons, did you rotate your paddy rice with another crop planted in the same plot area?                                                       | <input type="text"/>                                                 |                      |                      | yes... 1<br>No.....2>>HA_24<br>do not know..... 3>>HA_24                                                                                                 |
| HA_23  | What was cultivated in the plot in the season before you planted the rice?<br>[MULTIPLE RESPONSE]                                                                         | <input type="text"/>                                                 | <input type="text"/> | <input type="text"/> | [crop code]                                                                                                                                              |
| HA_24  | Did you apply fertilizer to the paddy rice in the past year?                                                                                                              | <input type="text"/>                                                 |                      |                      | yes... 1<br>No.....2>>HA_28                                                                                                                              |
| HA_25  | At which times did you apply fertilizer to the paddy rice?<br>[MULTIPLE RESPONSE]                                                                                         | <input type="text"/><br><input type="text"/><br><input type="text"/> |                      |                      | Land preparation stage ..... 1<br>planting ..... 2<br>early growth stage ..... 3<br>mid crop ..... 4<br>others(specify)..... 96                          |
| HA_26  | What type of fertilizer did you use?<br>[MULTIPLE RESPONSE]                                                                                                               | <input type="text"/><br><input type="text"/><br><input type="text"/> |                      |                      | SOIL BASED ORGANIC..... 1<br>SOIL BASED INORGANIC ..... 2<br>FOLIAR FEEDS ORGANIC ..... 3<br>FOLIAR FEEDS INORGANIC.... 4<br>Others(specify)..... 96     |

Household Number:    

| Q. No. | Technology Questions                                                                                                                                                                                                                      | Response                                                                                                                            | Response codes                                                                                                                                                                                                                  |
|--------|-------------------------------------------------------------------------------------------------------------------------------------------------------------------------------------------------------------------------------------------|-------------------------------------------------------------------------------------------------------------------------------------|---------------------------------------------------------------------------------------------------------------------------------------------------------------------------------------------------------------------------------|
| HA_27  | What is the name of the fertilizer you mainly used for your rice in the past year?<br>[MULTIPLE RESPONSE]                                                                                                                                 | <input type="text"/> <input type="text"/><br><input type="text"/> <input type="text"/><br><input type="text"/> <input type="text"/> | Urea....1<br>Guti urea...2<br>TSP...3<br>SSP...4<br>DAP.....5<br>MAP...6<br>MP...7<br>Zinc....8<br>Ammonia....9<br>Zypsum...10<br>NPKS....11<br>Others(specify)...12<br>Donot know...13<br>Donot use chemical fertilizer.....14 |
| HA_28  | Did you apply animal manure to your rice fields in the past year?                                                                                                                                                                         | <input type="text"/>                                                                                                                | yes...1 No.....2>>HA_31                                                                                                                                                                                                         |
| HA_29  | How was animal manure applied to your rice fields?                                                                                                                                                                                        | <input type="text"/>                                                                                                                | Animals graze & leave dung on field...1<br>Manure applied to field by hand... 2<br>Manure applied to field with machine...3<br>Others(specify)...96                                                                             |
| HA_30  | Where did you get the manure you applied to your rice fields?<br>[MULTIPLE RESPONSE]                                                                                                                                                      | <input type="text"/><br><input type="text"/>                                                                                        | Produced by own animals ..... 1<br>Given by family/friends/neighbours' farm.. 2<br>Purchased from market ..... 3<br>Others(specify)...96                                                                                        |
| HA_31  | When decisions are made regarding whether or not to use fertilizer for your rice, who is it that normally takes the decision?<br>[MULTIPLE RESPONSE]<br><b>Record multiple responses only when there are more than one decision-maker</b> | <input type="text"/><br><input type="text"/><br><input type="text"/>                                                                | Self..... 1<br>Spouse ..... 2<br>Other hh member ..... 3<br>Other non hh member ..... 4                                                                                                                                         |
| HA_32  | Have you been trained in how to use inorganic fertilizer for paddy rice?<br>Inorganic fertilizer is a man-made fertilizer that you can buy in a bag at the shop.                                                                          | <input type="text"/>                                                                                                                | Yes...1 No.....2                                                                                                                                                                                                                |
| HA_33  | Did you have any insect, rodent, or disease attacks on your paddy rice in the past year?                                                                                                                                                  | <input type="text"/>                                                                                                                | Yes...1 No.....2                                                                                                                                                                                                                |
| HA_34  | Did you use chemicals to control insect, rodent, or disease attacks on the paddy rice?                                                                                                                                                    | <input type="text"/>                                                                                                                | Yes...1 No.....2>>Ha_36                                                                                                                                                                                                         |
| HA_35  | Was the use of chemicals preventive, or was it in response to an insect, rodent, or disease attack?                                                                                                                                       | <input type="text"/>                                                                                                                | Preventive ..... 1<br>Protective ..... 2<br>both preventive and protective ..... 3                                                                                                                                              |
| HA_36  | Have you been trained in when to use and how to apply pesticides for paddy rice?                                                                                                                                                          | <input type="text"/>                                                                                                                | Yes...1 No.....2                                                                                                                                                                                                                |

Household Number:

| Q. No. | Technology Questions                                                                                             | Response                                                                                                             | Response codes                                                                                                                   |
|--------|------------------------------------------------------------------------------------------------------------------|----------------------------------------------------------------------------------------------------------------------|----------------------------------------------------------------------------------------------------------------------------------|
| HA_37  | How many times did you control weeds among your paddy rice crops in the past year?                               | <input type="text"/>                                                                                                 | Frequency (number)<br>None .....00>>ha_39                                                                                        |
| HA_38  | How did you control the weeds among your paddy rice crops?<br>[MULTIPLE RESPONSE]                                | <input type="text"/><br><input type="text"/><br><input type="text"/><br><input type="text"/><br><input type="text"/> | Hoe ..... 1<br>Herbicide ..... 2<br>Intercropping ..... 3<br>Slashing ..... 4<br>Pull by hand ..... 5                            |
| HA_39  | Have you ever been trained in when to use and how to apply herbicides for paddy rice crops?                      | <input type="text"/>                                                                                                 | Yes...1 No....2                                                                                                                  |
| HA_40  | In the past year, did you use any of the following techniques to manage soil and water for your paddy rice crop? | a) Terracing <input type="text"/>                                                                                    | Yes...1 No....2                                                                                                                  |
|        |                                                                                                                  | b) soil bands/trenches <input type="text"/>                                                                          | Yes...1 No....2                                                                                                                  |
|        |                                                                                                                  | c) adding lime to soil <input type="text"/>                                                                          | Yes...1 No....2                                                                                                                  |
|        |                                                                                                                  | Other (specify) _____ <input type="text"/>                                                                           | Yes...1 No....2                                                                                                                  |
| HA_41  | Besides rainfall, did you use any additional irrigation methods for the paddy rice?                              | <input type="text"/>                                                                                                 | Yes...1 No....2>>HA_43                                                                                                           |
| HA_42  | What type of irrigation did you use?<br>[MULTIPLE RESPONSE]                                                      | <input type="text"/><br><input type="text"/><br><input type="text"/><br><input type="text"/>                         | By hand (watering can, hose, etc.) ..... 1<br>Canals..... 2<br>Permanent hose ..... 3<br>Pump ..... 4<br>Othrs (specify)..... 96 |
| HA_43  | How did you harvest the paddy rice?                                                                              | <input type="text"/>                                                                                                 | With a sickle ..... 1<br>With a scythe..... 2<br>With a motorized harvester ..... 3<br>Not yet harvested ..... 4                 |

Household Number:

| Q. No. | Technology Questions                                                                                                  | Response                                                                                                                                     | Response codes                                                                                                                                                                                                                                                                                                                                                                                            |
|--------|-----------------------------------------------------------------------------------------------------------------------|----------------------------------------------------------------------------------------------------------------------------------------------|-----------------------------------------------------------------------------------------------------------------------------------------------------------------------------------------------------------------------------------------------------------------------------------------------------------------------------------------------------------------------------------------------------------|
| HA_44  | What did you dry the paddy rice on?<br>[MULTIPLE RESPONSE]                                                            | <input type="text"/><br><input type="text"/><br><input type="text"/><br><input type="text"/><br><input type="text"/><br><input type="text"/> | Bare ground..... 1<br>Ground plastered with cow dung ..... 2<br>Left to dry on plant in field ..... 3<br>Tarpaulins ..... 4<br>Matress made by sewing plastic bag or sack....5<br>Matress made by sewing bag or sack....6<br>Net made of nilon.....7<br>Drying yard with cemented ground..... 8<br>Drying racks..... 9<br>Solar dryers ..... 10<br>Mechanized dryers ..... 11<br>Others (specify)..... 96 |
| HA_45  | How did you thresh the rice?<br>[MULTIPLE RESPONSE]                                                                   | <input type="text"/><br><input type="text"/><br><input type="text"/><br><input type="text"/><br><input type="text"/>                         | Trampled by cattle/oxen....1<br>Beat with sticks...2<br>Beat with a flail...3<br>Used a treadle thresher....4<br>Used a motorized thresher....5<br>Did not thresh....6>>ha_47<br>Others (specify).....96                                                                                                                                                                                                  |
| HA_46  | After threshing the rice, what was done with the straw?<br>[MULTIPLE RESPONSE]                                        | <input type="text"/><br><input type="text"/><br><input type="text"/><br><input type="text"/><br><input type="text"/><br><input type="text"/> | Burned..1<br>Incorporated back into the soil....2<br>Used as bedding for own livestock....3<br>Used as cooking fuel....4<br>Left in field for grazing by animals.....5<br>Fed to own animals....6<br>Sold to others....7<br>Gave to others ..... 8<br>Others (specify)..... 96                                                                                                                            |
| HA_47  | Did you put the paddy rice in bags or other containers after harvest for storage or transport?<br>[MULTIPLE RESPONSE] | <input type="text"/><br><input type="text"/><br><input type="text"/>                                                                         | Yes, in buckets ..... 1>>ha_49<br>Yes, in drums ..... 2>>ha_49<br>Yes, in bags ..... 3<br>No.....4                                                                                                                                                                                                                                                                                                        |

Household Number:

| Q. No. | Technology Questions                                                                         | Response                                                             | Response codes                                                                                                                                                                                                               |
|--------|----------------------------------------------------------------------------------------------|----------------------------------------------------------------------|------------------------------------------------------------------------------------------------------------------------------------------------------------------------------------------------------------------------------|
| HA_48  | What type of storage bag did you use for the paddy rice?<br>[MULTIPLE RESPONSE]              | <input type="text"/><br><input type="text"/><br><input type="text"/> | Woven bag, single layer ..... 1<br>Two- or three-layered woven bags ..... 2<br>Hermetic bag ..... 3                                                                                                                          |
| HA_49  | Did you use any of the following storage locations to store the paddy rice?                  | সংরক্ষণস্থল                                                          |                                                                                                                                                                                                                              |
|        |                                                                                              | a) Residential house?                                                | <input type="text"/>                                                                                                                                                                                                         |
|        |                                                                                              | b) Cribs?                                                            | <input type="text"/>                                                                                                                                                                                                         |
|        |                                                                                              | c) Granaries?                                                        | <input type="text"/>                                                                                                                                                                                                         |
|        |                                                                                              | d) Other constructed stores?                                         | <input type="text"/>                                                                                                                                                                                                         |
|        |                                                                                              | e) Warehouses?                                                       | <input type="text"/>                                                                                                                                                                                                         |
|        |                                                                                              | f) Storage silos?                                                    | <input type="text"/>                                                                                                                                                                                                         |
|        |                                                                                              | g) OTHER (SPECIFY)                                                   | <input type="text"/>                                                                                                                                                                                                         |
|        | CHECK ALL CATEGORIES FOR HA_49, IF ANY YES (CODE '1') THEN CONTINUE, OTHERWISE SKIP TO HA_51 |                                                                      |                                                                                                                                                                                                                              |
| HA_50  | Was your paddy rice attacked by insects, rodents, or disease while in storage?               | <input type="text"/>                                                 | Yes...1 No.....2                                                                                                                                                                                                             |
| HA_51  | What information source do you rely on the most to help you grow your rice crop well?        | <input type="text"/>                                                 | Friend/neighbor ..... 1<br>Agro-input dealer ..... 2<br>Ag extension worker ..... 3<br>School ..... 4<br>Radio program....5<br>Television.....6<br>Mobile phone messaging.....7<br>Internet.....8<br>Others (specify).....96 |

Module End Time: Hour   Minute

Household Number:

**Module I5: Access to Technologies (Male)**

**I5a:** When was the household formed (year)? \_\_\_\_\_

Module start time: Hour   Minu

Respondent ID:  Consent :  Yes ...1  
No.....2

**I5b:** Which year did you start rice farming? \_\_\_\_\_

**I5c:** Which year did you start farming? \_\_\_\_\_

| Code  | List of Technologies                  | Are you aware of this tech? Yes ..1 No ...2 | Do you use this technology now? Yes .....1 No .....2 | If yes, is it rented or owned? Rented ...1 Owned .....2 | Have you used this technology in the past? Yes .....1 No .....2 | When did you start using this technology? .....9999> >I5_06 | If you have used this technology in the past, and no longer use it, when did you stop using it? Have not stopped ...9999 | Reason for not using now? | When was this technology first available in your village? ..... 9999>next row | Please mark the years that you have used this technology within the past 10 years?<br>Yes... 1<br>No .... 2 |       |       |       |       |       |       |       |       |       |
|-------|---------------------------------------|---------------------------------------------|------------------------------------------------------|---------------------------------------------------------|-----------------------------------------------------------------|-------------------------------------------------------------|--------------------------------------------------------------------------------------------------------------------------|---------------------------|-------------------------------------------------------------------------------|-------------------------------------------------------------------------------------------------------------|-------|-------|-------|-------|-------|-------|-------|-------|-------|
|       |                                       |                                             |                                                      |                                                         |                                                                 |                                                             |                                                                                                                          |                           |                                                                               | 2018                                                                                                        | 2017  | 2016  | 2015  | 2014  | 2013  | 2012  | 2011  | 2010  | 2009  |
|       |                                       |                                             | Code                                                 |                                                         | Code                                                            | (year)                                                      | (year)                                                                                                                   | Code                      | (year)                                                                        | Code                                                                                                        | Code  | Code  | Code  | Code  | Code  | Code  | Code  | Code  | Code  |
| I5_01 | Description                           | I5_17                                       | I5_02                                                | I5_18                                                   | I5_03                                                           | I5_04                                                       | I5_05                                                                                                                    | I5_05b                    | I5_06                                                                         | I5_07                                                                                                       | I5_08 | I5_09 | I5_10 | I5_11 | I5_12 | I5_13 | I5_14 | I5_15 | I5_16 |
| 1     | Guti Urea                             |                                             |                                                      |                                                         |                                                                 |                                                             |                                                                                                                          |                           |                                                                               |                                                                                                             |       |       |       |       |       |       |       |       |       |
| 2     | BRRi dhan BR-41 (aman)                |                                             |                                                      |                                                         |                                                                 |                                                             |                                                                                                                          |                           |                                                                               |                                                                                                             |       |       |       |       |       |       |       |       |       |
| 3     | BRRi dhan BR-43 (aus)                 |                                             |                                                      |                                                         |                                                                 |                                                             |                                                                                                                          |                           |                                                                               |                                                                                                             |       |       |       |       |       |       |       |       |       |
| 4     | BRRi dhan BR-44 (aman)                |                                             |                                                      |                                                         |                                                                 |                                                             |                                                                                                                          |                           |                                                                               |                                                                                                             |       |       |       |       |       |       |       |       |       |
| 5     | BRRi dhan BR-46 (aman)                |                                             |                                                      |                                                         |                                                                 |                                                             |                                                                                                                          |                           |                                                                               |                                                                                                             |       |       |       |       |       |       |       |       |       |
| 6     | BRRi dhan BR-47 (boro)                |                                             |                                                      |                                                         |                                                                 |                                                             |                                                                                                                          |                           |                                                                               |                                                                                                             |       |       |       |       |       |       |       |       |       |
| 7     | BRRi dhan BR-50 (Banglar moti) (boro) |                                             |                                                      |                                                         |                                                                 |                                                             |                                                                                                                          |                           |                                                                               |                                                                                                             |       |       |       |       |       |       |       |       |       |
| 8     | BRRi dhan BR-51 (aman)                |                                             |                                                      |                                                         |                                                                 |                                                             |                                                                                                                          |                           |                                                                               |                                                                                                             |       |       |       |       |       |       |       |       |       |
| 9     | BRRi dhan BR-52 (aman)                |                                             |                                                      |                                                         |                                                                 |                                                             |                                                                                                                          |                           |                                                                               |                                                                                                             |       |       |       |       |       |       |       |       |       |

Household Number:

| Code  | List of Technologies           | Are you aware of this technology?<br>Yes...1<br>No...2 | Do you use this technology now?<br>Yes<br>.....1<br>No<br>.....2 | If yes, is it rented or owned?<br>Rented...1<br>Owned.....2 | Have you used this technology in the past?<br>Yes<br>.....1<br>No<br>.....2 | When did you start using this technology?<br>.....9999><br>>I5_06 | If you have used this technology in the past, and no longer use it, when did you stop using it?<br><br>Have not stopped...9999 | Reason for not using now? | When was this technology first available in your village?<br>.....<br>9999>next row | Please mark the years that you have used this technology within the past 10 years?<br>Yes... 1<br>No.... 2 |       |       |       |       |       |       |       |       |       |
|-------|--------------------------------|--------------------------------------------------------|------------------------------------------------------------------|-------------------------------------------------------------|-----------------------------------------------------------------------------|-------------------------------------------------------------------|--------------------------------------------------------------------------------------------------------------------------------|---------------------------|-------------------------------------------------------------------------------------|------------------------------------------------------------------------------------------------------------|-------|-------|-------|-------|-------|-------|-------|-------|-------|
|       |                                |                                                        |                                                                  |                                                             |                                                                             |                                                                   |                                                                                                                                |                           |                                                                                     | 2018                                                                                                       | 2017  | 2016  | 2015  | 2014  | 2013  | 2012  | 2011  | 2010  | 2009  |
|       |                                |                                                        | Code                                                             |                                                             | Code                                                                        | (year)                                                            | (year)                                                                                                                         | Code                      | (year)                                                                              | Code                                                                                                       | Code  | Code  | Code  | Code  | Code  | Code  | Code  | Code  | Code  |
| I5_01 | Description                    | I5_17                                                  | I5_02                                                            | I5_18                                                       | I5_03                                                                       | I5_04                                                             | I5_05                                                                                                                          | I5_05b                    | I5_06                                                                               | I5_07                                                                                                      | I5_08 | I5_09 | I5_10 | I5_11 | I5_12 | I5_13 | I5_14 | I5_15 | I5_16 |
| 10    | BRRRI dhan BR-53 (aman)        |                                                        |                                                                  |                                                             |                                                                             |                                                                   |                                                                                                                                |                           |                                                                                     |                                                                                                            |       |       |       |       |       |       |       |       |       |
| 11    | BRRRI dhan BR-54 (aman)        |                                                        |                                                                  |                                                             |                                                                             |                                                                   |                                                                                                                                |                           |                                                                                     |                                                                                                            |       |       |       |       |       |       |       |       |       |
| 12    | BRRRI dhan BR-55 (boro/aus)    |                                                        |                                                                  |                                                             |                                                                             |                                                                   |                                                                                                                                |                           |                                                                                     |                                                                                                            |       |       |       |       |       |       |       |       |       |
| 13    | BRRRI dhan BR-56 (aman)        |                                                        |                                                                  |                                                             |                                                                             |                                                                   |                                                                                                                                |                           |                                                                                     |                                                                                                            |       |       |       |       |       |       |       |       |       |
| 14    | BRRRI dhan BR-57 (aman)        |                                                        |                                                                  |                                                             |                                                                             |                                                                   |                                                                                                                                |                           |                                                                                     |                                                                                                            |       |       |       |       |       |       |       |       |       |
| 15    | BRRRI dhan BR-60 (boro)        |                                                        |                                                                  |                                                             |                                                                             |                                                                   |                                                                                                                                |                           |                                                                                     |                                                                                                            |       |       |       |       |       |       |       |       |       |
| 16    | BRRRI dhan BR-61 (boro)        |                                                        |                                                                  |                                                             |                                                                             |                                                                   |                                                                                                                                |                           |                                                                                     |                                                                                                            |       |       |       |       |       |       |       |       |       |
| 17    | BRRRI dhan BR-62 (Zinc) (aman) |                                                        |                                                                  |                                                             |                                                                             |                                                                   |                                                                                                                                |                           |                                                                                     |                                                                                                            |       |       |       |       |       |       |       |       |       |
| 18    | BRRRI dhan BR-64 (Zinc) (boro) |                                                        |                                                                  |                                                             |                                                                             |                                                                   |                                                                                                                                |                           |                                                                                     |                                                                                                            |       |       |       |       |       |       |       |       |       |
| 19    | BRRRI dhan BR-66 (drought)     |                                                        |                                                                  |                                                             |                                                                             |                                                                   |                                                                                                                                |                           |                                                                                     |                                                                                                            |       |       |       |       |       |       |       |       |       |

Household Number:

| Code  | List of Technologies                     | Are you aware of this technology?<br>Yes...1<br>No...2 | Do you use this technology now?<br>Yes<br>.....1<br>No<br>.....2 | If yes, is it rented or owned?<br>Rented...1<br>Owned...2 | Have you used this technology in the past?<br>Yes<br>.....1<br>No<br>.....2 | When did you start using this technology?<br>.....9999><br>>I5_06 | If you have used this technology in the past, and no longer use it, when did you stop using it?<br><br>Have not stopped...9999 | Reason for not using now? | When was this technology first available in your village?<br>.....<br>9999>next row | Please mark the years that you have used this technology within the past 10 years?<br>Yes... 1<br>No.... 2 |       |       |       |       |       |       |       |       |       |
|-------|------------------------------------------|--------------------------------------------------------|------------------------------------------------------------------|-----------------------------------------------------------|-----------------------------------------------------------------------------|-------------------------------------------------------------------|--------------------------------------------------------------------------------------------------------------------------------|---------------------------|-------------------------------------------------------------------------------------|------------------------------------------------------------------------------------------------------------|-------|-------|-------|-------|-------|-------|-------|-------|-------|
|       |                                          |                                                        |                                                                  |                                                           |                                                                             |                                                                   |                                                                                                                                |                           |                                                                                     | 2018                                                                                                       | 2017  | 2016  | 2015  | 2014  | 2013  | 2012  | 2011  | 2010  | 2009  |
|       |                                          |                                                        | Code                                                             |                                                           | Code                                                                        | (year)                                                            | (year)                                                                                                                         | Code                      | (year)                                                                              | Code                                                                                                       | Code  | Code  | Code  | Code  | Code  | Code  | Code  | Code  | Code  |
| I5_01 | Description                              | I5_17                                                  | I5_02                                                            | I5_18                                                     | I5_03                                                                       | I5_04                                                             | I5_05                                                                                                                          | I5_05b                    | I5_06                                                                               | I5_07                                                                                                      | I5_08 | I5_09 | I5_10 | I5_11 | I5_12 | I5_13 | I5_14 | I5_15 | I5_16 |
|       | tolerant)<br>(aman)                      |                                                        |                                                                  |                                                           |                                                                             |                                                                   |                                                                                                                                |                           |                                                                                     |                                                                                                            |       |       |       |       |       |       |       |       |       |
| 20    | BRR1 dhan BR-67 (saline tolerant) (boro) |                                                        |                                                                  |                                                           |                                                                             |                                                                   |                                                                                                                                |                           |                                                                                     |                                                                                                            |       |       |       |       |       |       |       |       |       |
| 21    | BRR1 dhan BR-69 (weed resistant) (boro)  |                                                        |                                                                  |                                                           |                                                                             |                                                                   |                                                                                                                                |                           |                                                                                     |                                                                                                            |       |       |       |       |       |       |       |       |       |
| 22    | Bina - 7 (aman)                          |                                                        |                                                                  |                                                           |                                                                             |                                                                   |                                                                                                                                |                           |                                                                                     |                                                                                                            |       |       |       |       |       |       |       |       |       |
| 23    | Bina - 8 (boro/aus)                      |                                                        |                                                                  |                                                           |                                                                             |                                                                   |                                                                                                                                |                           |                                                                                     |                                                                                                            |       |       |       |       |       |       |       |       |       |
| 24    | Bina - 11 (aus/aman)                     |                                                        |                                                                  |                                                           |                                                                             |                                                                   |                                                                                                                                |                           |                                                                                     |                                                                                                            |       |       |       |       |       |       |       |       |       |
| 25    | Bina - 12 (aman)                         |                                                        |                                                                  |                                                           |                                                                             |                                                                   |                                                                                                                                |                           |                                                                                     |                                                                                                            |       |       |       |       |       |       |       |       |       |
| 26    | Four wheel Tractor                       |                                                        |                                                                  |                                                           |                                                                             |                                                                   |                                                                                                                                |                           |                                                                                     |                                                                                                            |       |       |       |       |       |       |       |       |       |
| 27    | Two wheel tractor (Power tiller)         |                                                        |                                                                  |                                                           |                                                                             |                                                                   |                                                                                                                                |                           |                                                                                     |                                                                                                            |       |       |       |       |       |       |       |       |       |
| 28    | Axial flow pump/ (jumbo pump)            |                                                        |                                                                  |                                                           |                                                                             |                                                                   |                                                                                                                                |                           |                                                                                     |                                                                                                            |       |       |       |       |       |       |       |       |       |



Household Number:

| Code  | List of Technologies                                              | Are you aware of this tech?<br>Yes...1<br>No...2 | Do you use this technology now?<br>Yes<br>.....1<br>No<br>.....2 | If yes, is it rented or owned?<br>Rented...1<br>Owned.....2 | Have you used this technology in the past?<br>Yes<br>.....1<br>No<br>.....2 | When did you start using this technology?<br>.....9999><br>>I5_06 | If you have used this technology in the past, and no longer use it, when did you stop using it?<br><br>Have not stopped...9999 | Reason for not using now? | When was this technology first available in your village?<br>.....<br>9999>next row | Please mark the years that you have used this technology within the past 10 years?<br>Yes... 1<br>No.... 2 |       |       |       |       |       |       |       |       |       |
|-------|-------------------------------------------------------------------|--------------------------------------------------|------------------------------------------------------------------|-------------------------------------------------------------|-----------------------------------------------------------------------------|-------------------------------------------------------------------|--------------------------------------------------------------------------------------------------------------------------------|---------------------------|-------------------------------------------------------------------------------------|------------------------------------------------------------------------------------------------------------|-------|-------|-------|-------|-------|-------|-------|-------|-------|
|       |                                                                   |                                                  |                                                                  |                                                             |                                                                             |                                                                   |                                                                                                                                |                           |                                                                                     | 2018                                                                                                       | 2017  | 2016  | 2015  | 2014  | 2013  | 2012  | 2011  | 2010  | 2009  |
|       |                                                                   |                                                  | Code                                                             |                                                             | Code                                                                        | (year)                                                            | (year)                                                                                                                         | Code                      | (year)                                                                              | Code                                                                                                       | Code  | Code  | Code  | Code  | Code  | Code  | Code  | Code  | Code  |
| I5_01 | Description                                                       | I5_17                                            | I5_02                                                            | I5_18                                                       | I5_03                                                                       | I5_04                                                             | I5_05                                                                                                                          | I5_05b                    | I5_06                                                                               | I5_07                                                                                                      | I5_08 | I5_09 | I5_10 | I5_11 | I5_12 | I5_13 | I5_14 | I5_15 | I5_16 |
| 29    | Irrigation pump (LLP)                                             |                                                  |                                                                  |                                                             |                                                                             |                                                                   |                                                                                                                                |                           |                                                                                     |                                                                                                            |       |       |       |       |       |       |       |       |       |
| 30    | Irrigation pump (Shallow)                                         |                                                  |                                                                  |                                                             |                                                                             |                                                                   |                                                                                                                                |                           |                                                                                     |                                                                                                            |       |       |       |       |       |       |       |       |       |
| 31    | Irrigation pump (Deep)                                            |                                                  |                                                                  |                                                             |                                                                             |                                                                   |                                                                                                                                |                           |                                                                                     |                                                                                                            |       |       |       |       |       |       |       |       |       |
| 32    | Reapers                                                           |                                                  |                                                                  |                                                             |                                                                             |                                                                   |                                                                                                                                |                           |                                                                                     |                                                                                                            |       |       |       |       |       |       |       |       |       |
| 33    | Paddle thresher                                                   |                                                  |                                                                  |                                                             |                                                                             |                                                                   |                                                                                                                                |                           |                                                                                     |                                                                                                            |       |       |       |       |       |       |       |       |       |
| 34    | Power thresher                                                    |                                                  |                                                                  |                                                             |                                                                             |                                                                   |                                                                                                                                |                           |                                                                                     |                                                                                                            |       |       |       |       |       |       |       |       |       |
| 35    | Seeder (Seeder Drills: till, plant, and fertilize simultaneously) |                                                  |                                                                  |                                                             |                                                                             |                                                                   |                                                                                                                                |                           |                                                                                     |                                                                                                            |       |       |       |       |       |       |       |       |       |
| 36    | Bed Planters (form fields into beds and furrows)                  |                                                  |                                                                  |                                                             |                                                                             |                                                                   |                                                                                                                                |                           |                                                                                     |                                                                                                            |       |       |       |       |       |       |       |       |       |
| 37    | Fertilizer Sprayer                                                |                                                  |                                                                  |                                                             |                                                                             |                                                                   |                                                                                                                                |                           |                                                                                     |                                                                                                            |       |       |       |       |       |       |       |       |       |

Household Number:

| Code  | List of Technologies | Are you aware of this technology?<br>Yes...1<br>No...2 | Do you use this technology now?<br>Yes<br>.....1<br>No<br>.....2 | If yes, is it rented or owned?<br>Rented...1<br>Owned.....2 | Have you used this technology in the past?<br>Yes<br>.....1<br>No<br>.....2 | When did you start using this technology?<br>.....9999><br>>I5_06 | If you have used this technology in the past, and no longer use it, when did you stop using it?<br><br>Have not stopped...9999 | Reason for not using now?<br><br>Code1 | When was this technology first available in your village?<br>.....<br>9999>next row | Please mark the years that you have used this technology within the past 10 years?<br>Yes... 1<br>No.... 2 |       |       |       |       |       |       |       |       |       |
|-------|----------------------|--------------------------------------------------------|------------------------------------------------------------------|-------------------------------------------------------------|-----------------------------------------------------------------------------|-------------------------------------------------------------------|--------------------------------------------------------------------------------------------------------------------------------|----------------------------------------|-------------------------------------------------------------------------------------|------------------------------------------------------------------------------------------------------------|-------|-------|-------|-------|-------|-------|-------|-------|-------|
|       |                      |                                                        |                                                                  |                                                             |                                                                             |                                                                   |                                                                                                                                |                                        |                                                                                     | 2018                                                                                                       | 2017  | 2016  | 2015  | 2014  | 2013  | 2012  | 2011  | 2010  | 2009  |
| I5_01 | Description          | I5_17                                                  | I5_02                                                            | I5_18                                                       | I5_03                                                                       | I5_04                                                             | I5_05                                                                                                                          | I5_05b                                 | I5_06                                                                               | I5_07                                                                                                      | I5_08 | I5_09 | I5_10 | I5_11 | I5_12 | I5_13 | I5_14 | I5_15 | I5_16 |
| 38    | Pesticide Sprayer    |                                                        |                                                                  |                                                             |                                                                             |                                                                   |                                                                                                                                |                                        |                                                                                     |                                                                                                            |       |       |       |       |       |       |       |       |       |
| 41    | Combined harvester   |                                                        |                                                                  |                                                             |                                                                             |                                                                   |                                                                                                                                |                                        |                                                                                     |                                                                                                            |       |       |       |       |       |       |       |       |       |
| 42    | Rice transplanter    |                                                        |                                                                  |                                                             |                                                                             |                                                                   |                                                                                                                                |                                        |                                                                                     |                                                                                                            |       |       |       |       |       |       |       |       |       |
| 43    | Closed drum thresher |                                                        |                                                                  |                                                             |                                                                             |                                                                   |                                                                                                                                |                                        |                                                                                     |                                                                                                            |       |       |       |       |       |       |       |       |       |
| 44    | Open drum thresher   |                                                        |                                                                  |                                                             |                                                                             |                                                                   |                                                                                                                                |                                        |                                                                                     |                                                                                                            |       |       |       |       |       |       |       |       |       |
| 45    | Corn sheller         |                                                        |                                                                  |                                                             |                                                                             |                                                                   |                                                                                                                                |                                        |                                                                                     |                                                                                                            |       |       |       |       |       |       |       |       |       |
| 46    | Sugarcane crusher    |                                                        |                                                                  |                                                             |                                                                             |                                                                   |                                                                                                                                |                                        |                                                                                     |                                                                                                            |       |       |       |       |       |       |       |       |       |
| 47    | Winnower             |                                                        |                                                                  |                                                             |                                                                             |                                                                   |                                                                                                                                |                                        |                                                                                     |                                                                                                            |       |       |       |       |       |       |       |       |       |
| 39    | Others (specify)     |                                                        |                                                                  |                                                             |                                                                             |                                                                   |                                                                                                                                |                                        |                                                                                     |                                                                                                            |       |       |       |       |       |       |       |       |       |
| 40    | Others (specify)     |                                                        |                                                                  |                                                             |                                                                             |                                                                   |                                                                                                                                |                                        |                                                                                     |                                                                                                            |       |       |       |       |       |       |       |       |       |

|                                                                                                           |                                                                                          |                                                                                           |                                                                                                                              |
|-----------------------------------------------------------------------------------------------------------|------------------------------------------------------------------------------------------|-------------------------------------------------------------------------------------------|------------------------------------------------------------------------------------------------------------------------------|
| Code 1: Reason for not using:<br>Not available in the market...1<br>Do not know about the technology....2 | Replaced with new tech...3<br>It became obsolete...4<br>Technology is inappropriate....5 | Expensive...6<br>Don't have the operating skill....7<br>Not in working condition now....8 | Spare parts are not available...9<br>Lack of skilled mechanic to repair....10<br>No rental market so cannot be rented.....11 |
|-----------------------------------------------------------------------------------------------------------|------------------------------------------------------------------------------------------|-------------------------------------------------------------------------------------------|------------------------------------------------------------------------------------------------------------------------------|

Module End Time:  Hour  Minute

Household Number:

**Module J: Agricultural Extension Services and Subsidies (Male)**

Hour   Minute   Respondant ID:  Respondant's Consent:  Yes..... 1  
No..... 2

**Module J1: Access to Agriculture Extension Services (Male)**

For last 1 year, December 1 2017 to November 30 2018.

| Question Number | Questions                                                                       | Response             | Code                                                          |
|-----------------|---------------------------------------------------------------------------------|----------------------|---------------------------------------------------------------|
| <b>J1</b>       | Did you grow any crop during last 12 months?                                    | <input type="text"/> | Yes ..... 1<br>No..... 2>> <b>Module J1a</b>                  |
| <b>J1_01</b>    | Did any agricultural extension agent visit your farm during the last 12 months? | <input type="text"/> | Yes ..... 1<br>No..... 2>> <b>J1_04</b>                       |
| <b>J1_01b</b>   | If yes, who did the agent communicate with?                                     |                      | Only male..1<br>Only female...2<br>Both male and female.....3 |
| <b>J1_02</b>    | <b>How many times did s/he come?</b>                                            |                      |                                                               |
| <b>J1_02a</b>   | From government extension service office                                        | <input type="text"/> | (Report frequency of visit. Report '0' if not visited)        |
| <b>J1_02b</b>   | If J1_02a is not "0", who did the agent communicate with?                       |                      | Only male..1<br>Only female...2<br>Both male and female.....3 |
| <b>J1_02b</b>   | From NGO ( _____ )                                                              | <input type="text"/> | (Report frequency of visit. Report '0' if not visited)        |
| <b>J1_02c</b>   | From Other ( _____ )                                                            | <input type="text"/> | (Report frequency of visit. Report '0' if not visited)        |
| <b>J1_03</b>    | <b>Did you receive advice on the following?</b>                                 |                      |                                                               |
| <b>J1_03a</b>   | Fertilizer use                                                                  | <input type="text"/> | Yes ..... 1<br>No..... 2>> <b>J1_03c</b>                      |
| <b>J1_03b</b>   | Was the advice given useful?                                                    | <input type="text"/> | Yes, very ..... 1<br>Yes, somewhat ..... 2<br>No..... 3       |
| <b>J1_03c</b>   | Seed use                                                                        | <input type="text"/> | Yes ..... 1<br>No..... 2>> <b>J1_03e</b>                      |
| <b>J1_03d</b>   | Was the advice given useful?                                                    | <input type="text"/> | Yes, very ..... 1<br>Yes, somewhat ..... 2<br>No..... 3       |
| <b>J1_03e</b>   | Irrigation use                                                                  | <input type="text"/> | Yes ..... 1<br>No..... 2>> <b>J1_03g</b>                      |

Household Number:

| Question Number | Questions                                                     | Response             | Code                                                          |
|-----------------|---------------------------------------------------------------|----------------------|---------------------------------------------------------------|
| J1_03f          | Was the advice given useful?                                  | <input type="text"/> | Yes, very ..... 1<br>Yes, somewhat ..... 2<br>No..... 3       |
| J1_03g          | Pesticide use                                                 | <input type="text"/> | Yes ..... 1<br>No..... 2>>J1_03i                              |
| J1_03h          | Was the advice given useful?                                  | <input type="text"/> | Yes, very ..... 1<br>Yes, somewhat ..... 2<br>No..... 3       |
| J1_03i          | Pest and Diseases                                             | <input type="text"/> | Yes ..... 1<br>No..... 2>>J1_03k                              |
| J1_03j          | Was the advice given useful?                                  | <input type="text"/> | Yes, very ..... 1<br>Yes, somewhat ..... 2<br>No..... 3       |
| J1_03k          | Cropping practice                                             | <input type="text"/> | Yes ..... 1<br>No..... 2>>J1_03m                              |
| J1_03l          | Was the advice given useful?                                  | <input type="text"/> | Yes, very ..... 1<br>Yes, somewhat ..... 2<br>No..... 3       |
| J1_03m          | Soil type                                                     | <input type="text"/> | Yes ..... 1<br>No..... 2>>J1_03o                              |
| J1_03n          | Was the advice given useful?                                  | <input type="text"/> | Yes, very ..... 1<br>Yes, somewhat ..... 2<br>No..... 3       |
| J1_03o          | Others(-----<br>-----)                                        | <input type="text"/> | Yes ..... 1<br>No..... 2>>J1_04                               |
| J1_03p          | Was the advice given useful?                                  | <input type="text"/> | Yes, very ..... 1<br>Yes, somewhat ..... 2<br>No..... 3       |
| J1_04           | Did you go to any extension agent or contacted over phone?    | <input type="text"/> | Yes ..... 1<br>No..... 2 >>J1_07                              |
| J1_04a1         | If yes, who went or who contacted over phone?                 | <input type="text"/> | Only male..1<br>Only female...2<br>Both male and female.....3 |
| J1_05           | <b>How many times did you visit or contact the following?</b> |                      |                                                               |
| J1_5a           | Government extension service office                           | <input type="text"/> | (Report frequency of visit. Report '0' if not visited)        |

Household Number:

| Question Number | Questions                                                | Response             | Code                                                          |
|-----------------|----------------------------------------------------------|----------------------|---------------------------------------------------------------|
| <b>J1_05b</b>   | If J1_5a is not "0", who did the agent communicate with? | <input type="text"/> | Only male..1<br>Only female...2<br>Both male and female.....3 |
| <b>J1_5b</b>    | NGO ( _____ )                                            | <input type="text"/> | (Report frequency of visit. Report '0' if not visited)        |
| <b>J1_5c</b>    | Other ( _____ )                                          | <input type="text"/> | (Report frequency of visit. Report '0' if not visited)        |
| <b>J1_06</b>    | <b>Did you receive advice on the following?</b>          | <input type="text"/> |                                                               |
| <b>J1_06a</b>   | Fertilizer use                                           | <input type="text"/> | Yes ..... 1<br>No.....2>>> <b>J1_06c</b>                      |
| <b>J1_06b</b>   | If yes, was the advice given useful?                     | <input type="text"/> | Yes, very ..... 1<br>Yes, somewhat ..... 2<br>No.....3        |
| <b>J1_06c</b>   | Seed use                                                 | <input type="text"/> | Yes ..... 1<br>No.....2>>> <b>J1_06e</b>                      |
| <b>J1_06d</b>   | If yes, was the advice given useful?                     | <input type="text"/> | Yes, very ..... 1<br>Yes, somewhat ..... 2<br>No.....3        |
| <b>J1_06e</b>   | Irrigation use                                           | <input type="text"/> | Yes ..... 1<br>No.....2>>> <b>J1_06g</b>                      |
| <b>J1_06f</b>   | If yes, was the advice given useful?                     | <input type="text"/> | Yes, very ..... 1<br>Yes, somewhat ..... 2<br>No.....3        |
| <b>J1_06g</b>   | Pesticide use                                            | <input type="text"/> | Yes ..... 1<br>No.....2>>> <b>J1_06i</b>                      |
| <b>J1_06h</b>   | If yes, was the advice given useful?                     | <input type="text"/> | Yes, very ..... 1<br>Yes, somewhat ..... 2<br>No.....3        |
| <b>J1_06i</b>   | Pest and Diseases                                        | <input type="text"/> | Yes ..... 1<br>No.....2>>> <b>J1_06k</b>                      |

Household Number:

| Question Number | Questions                                                                                              | Response             | Code                                                                                                                                                                                                                     |
|-----------------|--------------------------------------------------------------------------------------------------------|----------------------|--------------------------------------------------------------------------------------------------------------------------------------------------------------------------------------------------------------------------|
| J1_06j          | If yes, was the advice given useful?                                                                   | <input type="text"/> | Yes, very ..... 1<br>Yes, somewhat ..... 2<br>No..... 3                                                                                                                                                                  |
| J1_06k          | Cropping practice                                                                                      | <input type="text"/> | Yes ..... 1<br>No..... 2>>J1_06m                                                                                                                                                                                         |
| J1_06l          | If yes, was the advice given useful?                                                                   | <input type="text"/> | Yes, very ..... 1<br>Yes, somewhat ..... 2<br>No..... 3                                                                                                                                                                  |
| J1_06m          | Soil type                                                                                              | <input type="text"/> | Yes ..... 1<br>No..... 2>>J1_06o                                                                                                                                                                                         |
| J1_06n          | If yes, was the advice given useful?                                                                   | <input type="text"/> | Yes, very ..... 1<br>Yes, somewhat ..... 2<br>No..... 3                                                                                                                                                                  |
| J1_06o          | Others(-----)                                                                                          | <input type="text"/> | Yes ..... 1<br>No..... 2                                                                                                                                                                                                 |
| J1_06p          | If yes, was the advice given useful?                                                                   | <input type="text"/> | Yes, very ..... 1<br>Yes, somewhat ..... 2<br>No..... 3                                                                                                                                                                  |
| J1_07           | If no, why? (report primary reason)<br><br>(answer this question if answers to J1_01 and J1_04 are no) | <input type="text"/> | Did not face any problems 1<br>Extension officer non-helpful 2<br>Extension officer not knowledgeable..... 3<br>Extension office too far away 4<br>Do not know of any extension service office ..... 5<br>Others ..... 6 |
| J1_08           | Did you attend farmers' field school in last 12 months?                                                | <input type="text"/> | Yes ..... 1<br>No..... 2 >>J1_10                                                                                                                                                                                         |
| J1_09           | If yes, who attended?                                                                                  |                      | Only male..1<br>Only female...2<br>Both male and female....3                                                                                                                                                             |
|                 | Did you receive advice on the following?                                                               |                      |                                                                                                                                                                                                                          |

Household Number:

| Question Number | Questions                            | Response             | Code                                                    |
|-----------------|--------------------------------------|----------------------|---------------------------------------------------------|
| J1_09a          | Fertilizer use                       | <input type="text"/> | Yes ..... 1<br>No..... 2>> <b>J1_09c</b>                |
| J1_09b          | If yes, was the advice given useful? | <input type="text"/> | Yes, very ..... 1<br>Yes, somewhat ..... 2<br>No..... 3 |
| J1_09c          | Seed use                             | <input type="text"/> | Yes ..... 1<br>No..... 2>> <b>J1_09e</b>                |
| J1_09d          | If yes, was the advice given useful? | <input type="text"/> | Yes, very ..... 1<br>Yes, somewhat ..... 2<br>No..... 3 |
| J1_09e          | Irrigation use                       | <input type="text"/> | Yes ..... 1<br>No..... 2>> <b>J1_09g</b>                |
| J1_09f          | If yes, was the advice given useful? | <input type="text"/> | Yes, very ..... 1<br>Yes, somewhat ..... 2<br>No..... 3 |
| J1_09g          | Pesticide use                        | <input type="text"/> | Yes ..... 1<br>No..... 2>> <b>J1_09i</b>                |
| J1_09h          | If yes, was the advice given useful? | <input type="text"/> | Yes, very ..... 1<br>Yes, somewhat ..... 2<br>No..... 3 |
| J1_09i          | Pest and Diseases                    | <input type="text"/> | Yes ..... 1<br>No..... 2>> <b>J1_09k</b>                |
| J1_09j          | If yes, was the advice given useful? | <input type="text"/> | Yes, very ..... 1<br>Yes, somewhat ..... 2<br>No..... 3 |
| J1_09k          | Cropping practice                    | <input type="text"/> | Yes ..... 1<br>No..... 2>> <b>J1_09m</b>                |
| J1_09L          | If yes, was the advice given useful? | <input type="text"/> | Yes, very ..... 1<br>Yes, somewhat ..... 2<br>No..... 3 |
| J1_09m          | Soil type                            | <input type="text"/> | Yes ..... 1<br>No..... 2>> <b>J1_09o</b>                |
| J1_09n          | If yes, was the advice given useful? | <input type="text"/> | Yes, very ..... 1<br>Yes, somewhat ..... 2              |

Household Number:

| Question Number | Questions                                                                                                    | Response             | Code                                                                                                                                                                                                                   |
|-----------------|--------------------------------------------------------------------------------------------------------------|----------------------|------------------------------------------------------------------------------------------------------------------------------------------------------------------------------------------------------------------------|
|                 |                                                                                                              |                      | No..... 3                                                                                                                                                                                                              |
| <b>J1_09o</b>   | Others(-----<br>-----)                                                                                       | <input type="text"/> | Yes ..... 1<br>No..... 2>> <b>Next Module</b>                                                                                                                                                                          |
| <b>J1_09p</b>   | If yes, was the advice given useful?                                                                         | <input type="text"/> | Yes, very ..... 1<br>Yes, somewhat ..... 2<br>No..... 3                                                                                                                                                                |
| <b>J1_10</b>    | If no, why? (report primary reason)<br><br>(answer this question if answers to J1_01 and J1_04 are no)       | <input type="text"/> | Did not face any problems 1<br>Extension officer unhelpful 2<br>Extension officer not knowledgeable..... 3<br>Extension office too far away 4<br>Do not know of any extension service office ..... 5<br>Others ..... 6 |
| <b>J1_11</b>    | Did you ever have any communication with any agricultural extension agent? (including farmers' field school) | <input type="text"/> | Yes ..... 1<br>No..... 2                                                                                                                                                                                               |
| <b>J1_12</b>    | If yes, who had a communication?                                                                             | <input type="text"/> | Only male..1<br>Only female...2<br>Both male and female.....3                                                                                                                                                          |



Household Number:

**Module J1a: Access to livestock and fisheries Extension Services (Male)**

For last 1 year, December 1 2017 to November 30 2018.

| Question Number | Questions                                                                              | livestock                | Poultry                  | Fish                     | Code                                                          |
|-----------------|----------------------------------------------------------------------------------------|--------------------------|--------------------------|--------------------------|---------------------------------------------------------------|
| <b>J1a_1</b>    | Did you produce any livestock/poultry/fish during last 12 months?                      | <input type="checkbox"/> | <input type="checkbox"/> | <input type="checkbox"/> | Yes.....1<br>No ..... 2>>Next Module                          |
| <b>J1a_01</b>   | Did any livestock/fisheries extension agent visit your farm during the last 12 months? | <input type="checkbox"/> | <input type="checkbox"/> | <input type="checkbox"/> | Yes.....1<br>No .....2>>J1a_04                                |
| <b>J1a_01b</b>  | If yes, who communicated with the agent?                                               |                          |                          |                          | Only male..1<br>Only female...2<br>Both male and female.....3 |
| <b>J1a_02</b>   | How many times did s/he come?                                                          |                          |                          |                          |                                                               |
| <b>J1a_02a</b>  | From government livestock/fisheries extension service office                           | <input type="checkbox"/> | <input type="checkbox"/> | <input type="checkbox"/> | (Report frequency of visit. Report '0' if not visited)        |
| <b>J1a_02b</b>  | If J1a_02a is not '0', who communicated with the agent?                                |                          |                          |                          | Only male..1<br>Only female...2<br>Both male and female.....3 |
| <b>J1a_02b</b>  | From NGO ( _____ )                                                                     | <input type="checkbox"/> | <input type="checkbox"/> | <input type="checkbox"/> | (Report frequency of visit. Report '0' if not visited)        |
| <b>J1a_02c</b>  | From Other ( _____ )                                                                   | <input type="checkbox"/> | <input type="checkbox"/> | <input type="checkbox"/> | (Report frequency of visit. Report '0' if not visited)        |
| <b>J1a_04</b>   | Did you go to any extension agent or contact one over phone?                           | <input type="checkbox"/> | <input type="checkbox"/> | <input type="checkbox"/> | Yes.....1<br>No .....2>>Next Module                           |
| <b>J1a_04a</b>  | If yes, who communicated with the agent contact one over phone?                        |                          |                          |                          | Only male..1<br>Only female...2<br>Both male and female.....3 |
| <b>J1a_05</b>   | If yes, how many times did you visit the following agent/agency/organization?          |                          |                          |                          |                                                               |
| <b>J1a_05a</b>  | Government livestock/fisheries extension service agent                                 | <input type="checkbox"/> | <input type="checkbox"/> | <input type="checkbox"/> | (Report frequency of visit. Report '0' if not visited)        |
| <b>J1a_05b</b>  | If J1a_5a is not "0" who communicated with the agent?                                  | <input type="checkbox"/> | <input type="checkbox"/> | <input type="checkbox"/> | Only male..1<br>Only female...2<br>Both male and female.....3 |
| <b>J1a_05b</b>  | NGO livestock/fisheries extension service agent ( _____ )                              | <input type="checkbox"/> | <input type="checkbox"/> | <input type="checkbox"/> | (Report frequency of visit. Report '0' if not visited)        |
| <b>J1a_05c</b>  | Other livestock/fisheries extension service agent ( _____ )                            | <input type="checkbox"/> | <input type="checkbox"/> | <input type="checkbox"/> | (Report frequency of visit. Report '0' if not visited)        |

Household Number:

**Module J2a: Government agriculture input subsidy card related information (Male)**

For last 1 year, December 1 2017 to November 30 2018.

| Question Number | Question                                                                                          | Response                     |                               | Code                                                                                                                                                                                                                                                                                                                                                                                         |
|-----------------|---------------------------------------------------------------------------------------------------|------------------------------|-------------------------------|----------------------------------------------------------------------------------------------------------------------------------------------------------------------------------------------------------------------------------------------------------------------------------------------------------------------------------------------------------------------------------------------|
| J2a_01          | Have you heard about the farmer's input subsidy card or farmer's agricultural input subsidy card? | <input type="text"/>         |                               | Yes ..... 1<br>No..... 2 >>Next Module                                                                                                                                                                                                                                                                                                                                                       |
| J2a_02          | Do/Did you have an agriculture input subsidy card?                                                | <input type="text"/>         |                               | Yes ..... 1<br>No..... 2 >>Next Module                                                                                                                                                                                                                                                                                                                                                       |
| J2a_03          | When did you receive the input subsidy card?                                                      | Year<br><input type="text"/> | Month<br><input type="text"/> | Month: January=1.....December =12                                                                                                                                                                                                                                                                                                                                                            |
| J2a_04          | How did you come to know about this card? (report primary source of information on subsidy card)  | <input type="text"/>         |                               | Response Code:<br>1. From UP Chairman<br>2. From UP member<br>3. From NGO worker<br>4. From school teacher<br>5. Courtyard meetings/ from radio<br>6. From TV<br>7. News papers<br>8. From friends/neighbors<br>9. Village Campaign<br>10. Sms from government<br>11. Recorded calls from GOB/NGO<br>12. Sub Assistant Agriculture Officer/SAAO<br>13. Village Police<br>14. Other (specify) |
| J2a_05          | Did you open a bank account using agriculture input subsidy card to get assistance?               | <input type="text"/>         |                               | Yes ..... 1<br>No..... 2                                                                                                                                                                                                                                                                                                                                                                     |
| J2a_06          | Do you receive or did you receive any agricultural input assistance?                              | <input type="text"/>         |                               | Yes, get now.....1<br>Previously got, now don't.....2>>J2a_09<br>Never received.....3>>J2a_10                                                                                                                                                                                                                                                                                                |

Household Number:    

| J2a_07    |             | If answer to "5" is yes, mention the quantity of subsidy |             |           |           |          |          |          |                          |                   |
|-----------|-------------|----------------------------------------------------------|-------------|-----------|-----------|----------|----------|----------|--------------------------|-------------------|
|           | Item        | Yes....1<br>No.....2>><br>next column                    | Cash (Taka) | Seed (kg) | Urea (kg) | TSP (kg) | DAP (kg) | MoP (kg) | Other fertilizer<br>(kg) | Pesticide<br>(kg) |
|           |             | a                                                        | b           | c         | d         | e        | f        | g        | h                        | i                 |
| J2a_07_01 | Wheat       |                                                          |             |           |           |          |          |          |                          |                   |
| J2a_07_02 | Maize       |                                                          |             |           |           |          |          |          |                          |                   |
| J2a_07_03 | Mustard     |                                                          |             |           |           |          |          |          |                          |                   |
| J2a_07_04 | Groundnut   |                                                          |             |           |           |          |          |          |                          |                   |
| J2a_07_05 | Sesame      |                                                          |             |           |           |          |          |          |                          |                   |
| J2a_07_06 | Summer mung |                                                          |             |           |           |          |          |          |                          |                   |
| J2a_07_07 | Winter mung |                                                          |             |           |           |          |          |          |                          |                   |
| J2a_07_08 | Khesari     |                                                          |             |           |           |          |          |          |                          |                   |
| J2a_07_09 | Mashkalai   |                                                          |             |           |           |          |          |          |                          |                   |
| J2a_07_10 | Phelon      |                                                          |             |           |           |          |          |          |                          |                   |
| J2a_07_12 | BT brinjal  |                                                          |             |           |           |          |          |          |                          |                   |
| J2a_07_13 | Boro        |                                                          |             |           |           |          |          |          |                          |                   |
| J2a_07_14 | Aman        |                                                          |             |           |           |          |          |          |                          |                   |
| J2a_07_15 | Aus NERICA  |                                                          |             |           |           |          |          |          |                          |                   |
| J2a_07_16 | Other Aus   |                                                          |             |           |           |          |          |          |                          |                   |
| J2a_07_17 | Other1      |                                                          |             |           |           |          |          |          |                          |                   |
| J2a_07_18 | Other 2     |                                                          |             |           |           |          |          |          |                          |                   |
| J2a_07_19 | Other 3     |                                                          |             |           |           |          |          |          |                          |                   |

Household Number:

|                  |                                                               |                             |                                            |                                                                          |
|------------------|---------------------------------------------------------------|-----------------------------|--------------------------------------------|--------------------------------------------------------------------------|
| <b>J2a_08</b>    | Did you buy any agricultural machinery at a subsidized price? |                             |                                            | Yes ..... 1 No 2>> Next Module                                           |
|                  | If yes                                                        | Yes=1<br>No=2>> Next column | Number of farmers hhs share this machinery | What percentage of the price did you have to pay to buy it? (percentage) |
|                  |                                                               | a                           | b                                          | c                                                                        |
| <b>J2a_08_01</b> | Tractor (4wheel)                                              |                             |                                            |                                                                          |
| <b>J2a_08_02</b> | Shallow tubewell engine or pump                               |                             |                                            |                                                                          |
| <b>J2a_08_03</b> | LLP                                                           |                             |                                            |                                                                          |
| <b>J2a_08_04</b> | Power tiller                                                  |                             |                                            |                                                                          |
| <b>J2a_08_05</b> | Combined harvester                                            |                             |                                            |                                                                          |
| <b>J2a_08_06</b> | Reaper                                                        |                             |                                            |                                                                          |
| <b>J2a_08_07</b> | Power thresher                                                |                             |                                            |                                                                          |
| <b>J2a_08_08</b> | Seeder                                                        |                             |                                            |                                                                          |
| <b>J2a_08_09</b> | Rice Trans planter                                            |                             |                                            |                                                                          |
| <b>J2a_08_10</b> | Other1                                                        |                             |                                            |                                                                          |
| <b>J2a_08_11</b> | Other2                                                        |                             |                                            |                                                                          |

|               |                                              |  |                                                                                                                                                                                                                                                                  |
|---------------|----------------------------------------------|--|------------------------------------------------------------------------------------------------------------------------------------------------------------------------------------------------------------------------------------------------------------------|
| <b>J2a_09</b> | If you don't get it now, what is the reason? |  | Do not cultivate the crop for which subsidy is given.....1<br>Amount of operating land did not qualify (decreased/increased in size) .....2<br>Do not know.....3<br>Other reasons (specify).....4                                                                |
| <b>J2a_10</b> | If never received, what is the reason?       |  | Do not cultivate the crop for which subsidy is given.....1<br>I was not selected for this subsidy.....2<br>Amount of operating land is more than 250 decimal.....3<br>Amount of operating land is less than 5 decimal.....4<br>Do not know.....5<br>Others.....6 |

Module End Time:

|      |                      |                      |        |                      |                      |
|------|----------------------|----------------------|--------|----------------------|----------------------|
| Hour | <input type="text"/> | <input type="text"/> | Minute | <input type="text"/> | <input type="text"/> |
|------|----------------------|----------------------|--------|----------------------|----------------------|

Household Number:

**Module K: Livestock and Poultry (Male)**

**Module K1: Livestock and poultry (Male)**

For last 1 year, December 1 2017 to November 30 2018.

Module Start Time:  Hour   Minute

Respondant ID:  Respondant's Consent:

Yes.....1  
No.....2

| Animal Name | Animal Code    | Type of asset*<br>Consumption only<br>.....<br>1<br>Consumption & Productive .....<br>2<br>Productive only<br>.....<br>3<br>No livestock<br>.....<br>4 | On December 1, 2017, how many were there and what was their value? |             | On November 30, 2018, how many were there and what was their value? |             | How many does the household own? | Total value of the animal | Who is the owner of the livestock/poultry?<br><br>Report 3 primary owners.<br>If HH member, write MID.<br>If outside household, use code 1. |        |            | Who looks after livestock/poultry?<br><br>Report 3 primary owners.<br>If HH member, write MID.<br>If outside household, use code 1. |            |        | In last 12 months (December 1, 2017 to November 30, 2018.) |        |            |        |        |        |
|-------------|----------------|--------------------------------------------------------------------------------------------------------------------------------------------------------|--------------------------------------------------------------------|-------------|---------------------------------------------------------------------|-------------|----------------------------------|---------------------------|---------------------------------------------------------------------------------------------------------------------------------------------|--------|------------|-------------------------------------------------------------------------------------------------------------------------------------|------------|--------|------------------------------------------------------------|--------|------------|--------|--------|--------|
|             |                |                                                                                                                                                        | No                                                                 | Total value | No                                                                  | Total value |                                  |                           | No                                                                                                                                          | Tk     | MID/Code 1 | No.                                                                                                                                 | MID/Code 1 | No.    | No.                                                        | Code ↑ | MID/Code 1 |        |        |        |
| Name        | Livestock Code | K1_01                                                                                                                                                  | K1_02a                                                             | K1_02b      | K1_03a                                                              | K1_03b      | K1_04                            | K1_04a                    | K1_05a                                                                                                                                      | K1_05b | K1_05c     | K1_06a                                                                                                                              | K1_06b     | K1_06c | K1_07                                                      | K1_08  | K1_09      | K1_10a | K1_10b | K1_10c |
| Bullock     | 1              |                                                                                                                                                        |                                                                    |             |                                                                     |             |                                  |                           |                                                                                                                                             |        |            |                                                                                                                                     |            |        |                                                            |        |            |        |        |        |
| Milk        | 2              |                                                                                                                                                        |                                                                    |             |                                                                     |             |                                  |                           |                                                                                                                                             |        |            |                                                                                                                                     |            |        |                                                            |        |            |        |        |        |
| Buffalo     | 3              |                                                                                                                                                        |                                                                    |             |                                                                     |             |                                  |                           |                                                                                                                                             |        |            |                                                                                                                                     |            |        |                                                            |        |            |        |        |        |
| Goat        | 4              |                                                                                                                                                        |                                                                    |             |                                                                     |             |                                  |                           |                                                                                                                                             |        |            |                                                                                                                                     |            |        |                                                            |        |            |        |        |        |
| Sheep       | 5              |                                                                                                                                                        |                                                                    |             |                                                                     |             |                                  |                           |                                                                                                                                             |        |            |                                                                                                                                     |            |        |                                                            |        |            |        |        |        |

Household Number:

|                       |    |  |  |  |  |  |  |  |  |  |  |  |  |  |  |  |
|-----------------------|----|--|--|--|--|--|--|--|--|--|--|--|--|--|--|--|
| Pig                   | 51 |  |  |  |  |  |  |  |  |  |  |  |  |  |  |  |
| Chicken (Layer)       | 61 |  |  |  |  |  |  |  |  |  |  |  |  |  |  |  |
| Chicken (Broiler)     | 62 |  |  |  |  |  |  |  |  |  |  |  |  |  |  |  |
| Chicken (Cockere)     | 63 |  |  |  |  |  |  |  |  |  |  |  |  |  |  |  |
| Duck                  | 8  |  |  |  |  |  |  |  |  |  |  |  |  |  |  |  |
| Other birds (specify) | 9  |  |  |  |  |  |  |  |  |  |  |  |  |  |  |  |
| Others (specify)      | 10 |  |  |  |  |  |  |  |  |  |  |  |  |  |  |  |

**Code 1:**  
 All members jointly ..... 71  
 Male outside household..... 72  
 Female outside household. .... 73  
 Govt./Khas land/other institutions ..... 74  
 Not applicable/No decision taken .....98

**Module K1: Livestock and poultry (continued) (Male)**

| Animal Name | Animal Code | In last 12 months (December 1 2017 to November 30 2018.), how many were |                |                     |                                   |             |                                                                                            | Where did you sell animal? | Total value of selling | Who decided to sell? | Who controls the sales proceed of the sale of livestock products | If you raise poultry, have any of your poultry been affected by bird flu within the last 12 months? |        |        |        |        |       |
|-------------|-------------|-------------------------------------------------------------------------|----------------|---------------------|-----------------------------------|-------------|--------------------------------------------------------------------------------------------|----------------------------|------------------------|----------------------|------------------------------------------------------------------|-----------------------------------------------------------------------------------------------------|--------|--------|--------|--------|-------|
|             |             | Received as gift/Inherited?                                             | Given as gift? | Received from lease | Lost (stolen/ burnt/ spoil/ died) |             | Sold (if not sold, write '0', and go to next row. If duck/ chicken/ bird then go to K1_21) |                            |                        |                      |                                                                  |                                                                                                     |        |        |        |        |       |
|             |             |                                                                         |                |                     | Number                            | Total value | Consumed by household                                                                      |                            |                        |                      |                                                                  |                                                                                                     |        |        |        |        |       |
|             | Code        | No                                                                      | No             | No                  | No                                | Tk          | No                                                                                         | No                         | Code ↑                 | Tk                   | MID/Code1                                                        | MID/Code1                                                                                           |        |        |        |        |       |
| Name        | Code        | K1_11                                                                   | K1_12          | K1_13               | K1_14a                            | K1_14b      | K1_15                                                                                      | K1_16                      | K1_17                  | K1_18                | K1_19a                                                           | K1_19b                                                                                              | K1_19c | K1_20a | K1_20b | K1_20c | K1_21 |



Household Number:

**Module ITMP1A: Improved Technology and Management Practices (ITMP) (Male)**

Module start time:  Hour    Minu   Respondent ID:  Consent :  Yes ...1  
No....2

| Question Number  | Question                                                                                           | Response             | Code                                                                                                             |
|------------------|----------------------------------------------------------------------------------------------------|----------------------|------------------------------------------------------------------------------------------------------------------|
| <b>ITMP1A_01</b> | Do you rear livestocks?                                                                            | <input type="text"/> | Yes.....1<br>No.....2>>Next Module <b>K2</b>                                                                     |
| <b>ITMP1A_02</b> | If yes, what is the main reason?                                                                   | <input type="text"/> | For consumption ..... 1<br>To sell ..... 2<br>Both for consumption and selling purpose.....3                     |
| <b>ITMP1A_03</b> | Do you use improved and appropriate varieties of breed management through artificial insemination? | <input type="text"/> | Yes ..... 1<br>No ..... 2                                                                                        |
| <b>ITMP1A_04</b> | Where do you usually keep the livestock?                                                           | <input type="text"/> | Livestock shed ..... 1<br>Inside the house..... 2<br>In open space in the yard..... 3<br>Others (specify)..... 4 |



Household Number:

**ModuleITMP1B: Improved livestock housing and feeding management practices (Male)**

| Question Number  | Question                                                                                                          | Response               |                      | Code                                                                                                 |
|------------------|-------------------------------------------------------------------------------------------------------------------|------------------------|----------------------|------------------------------------------------------------------------------------------------------|
| <b>ITMP1B_01</b> | If the livestock are kept in the shed, observe what the floor is made of.                                         | <input type="text"/>   |                      | Cement cast ..... 1<br>Made of brick (without welding).....2<br>Earthen floor.....3<br>Others .....4 |
| <b>ITMP1B_02</b> | If the livestock are kept in the shed, observe if the floor is dry.                                               | <input type="text"/>   |                      | Yes, dry ..... 1<br>No, not dry (wet) .....2                                                         |
| <b>ITMP1B_03</b> | Do you have a separate manager for watering and feeding?                                                          | <input type="text"/>   |                      | Yes..... 1<br>No.....2                                                                               |
| <b>ITMP1B_04</b> | Who mainly provides food and water for the livestock?                                                             | <input type="text"/>   |                      | MID<br>Hired male labor ..... 74<br>Hired female labor..... 75                                       |
| <b>ITMP1B_05</b> | Do you use concentrated feed and/or total mixed ration (TMR) and/or ready feed?                                   | <input type="text"/>   |                      | Yes..... 1<br>No.....2                                                                               |
| <b>ITMP1B_06</b> | In the last week (7 days), did you feed any of the grass/livestock food from the right column, to your livestock: | a) Napier 1, 2 & 3     | <input type="text"/> | Yes..... 1<br>No.....2                                                                               |
|                  |                                                                                                                   | b) Pukchong            | <input type="text"/> |                                                                                                      |
|                  |                                                                                                                   | c) German grass        | <input type="text"/> |                                                                                                      |
|                  |                                                                                                                   | d) Sweet jumbo         | <input type="text"/> |                                                                                                      |
|                  |                                                                                                                   | e) Jumbo gold          | <input type="text"/> |                                                                                                      |
|                  |                                                                                                                   | f) Para                | <input type="text"/> |                                                                                                      |
|                  |                                                                                                                   | g) Corn cob            | <input type="text"/> |                                                                                                      |
|                  |                                                                                                                   | h) Sage grass          | <input type="text"/> |                                                                                                      |
|                  |                                                                                                                   | i) Pea grass           | <input type="text"/> |                                                                                                      |
|                  |                                                                                                                   | j) Others/ local grass | <input type="text"/> |                                                                                                      |

Household Number:

**Module ITMP1B: Improved livestock health management practices (Male)**

| Question Number | Question                                                                                                                        | Response             | Code                                     |
|-----------------|---------------------------------------------------------------------------------------------------------------------------------|----------------------|------------------------------------------|
| ITMP1B_07       | In the last one year, you vaccinate your livestock's?                                                                           | <input type="text"/> | Yes..... 1<br>No ..... 2                 |
| ITMP1B_08       | In the last one year, you feed deworming tablets to your livestock?                                                             | <input type="text"/> | Yes..... 1<br>No ..... 2                 |
| ITMP1B_09       | In the last one year, how many times did you get your livestock's primary health checked?<br>Note: including any visits to vets | <input type="text"/> | Number<br>If not checked ever, write "0" |

**Module ITMP1C: Improved practices of handling, preservation, processing and storage meat, milk, and dairy products (Male)**

| Question Number | Question                                                                                                                                                                                                     | Response                      |                      | Code                                                          |
|-----------------|--------------------------------------------------------------------------------------------------------------------------------------------------------------------------------------------------------------|-------------------------------|----------------------|---------------------------------------------------------------|
| ITMP1C_01       | Who in the household mainly handles raw meat, milks the cow and prepares dairy products?                                                                                                                     | <input type="text"/>          |                      | MID<br>Hired male labor..... 74<br>Hired female labor..... 75 |
| ITMP1C_02       | Does the person who mainly handles raw meat, milks the cow and prepares dairy products wash hands with soap, water, detergent etc. before performing the tasks mentioned <u>in the column on the right</u> ? | Situation                     | Response             | Yes ..... 1<br>No..... 2<br>N/A..... 3                        |
|                 |                                                                                                                                                                                                              | a) After defecation           | <input type="text"/> |                                                               |
|                 |                                                                                                                                                                                                              | b) Before eating              | <input type="text"/> |                                                               |
|                 |                                                                                                                                                                                                              | c) After managing child feces | <input type="text"/> |                                                               |
|                 |                                                                                                                                                                                                              | d) Before feeding child       | <input type="text"/> |                                                               |

Household Number:

| Question Number  | Question                                                                                                                                                                                                     | Response                                                   |                      | Code                                                                                                                       |
|------------------|--------------------------------------------------------------------------------------------------------------------------------------------------------------------------------------------------------------|------------------------------------------------------------|----------------------|----------------------------------------------------------------------------------------------------------------------------|
|                  |                                                                                                                                                                                                              | e) Before handling food                                    | <input type="text"/> |                                                                                                                            |
|                  |                                                                                                                                                                                                              | f) Between handling raw meat/ foods and ready-to-eat foods | <input type="text"/> |                                                                                                                            |
|                  |                                                                                                                                                                                                              | g) Before milking cow                                      | <input type="text"/> |                                                                                                                            |
| <b>ITMP1C_03</b> | Does the person who mainly handles raw meat, milks the cow and prepares dairy products wash hands with soap, water, detergent etc. before performing the tasks mentioned <u>in the column on the right</u> ? | A) Before handling raw meat/ foods and ready-to-eat foods  | <input type="text"/> | Yes ..... 1<br>No..... 2<br>N/A..... 3                                                                                     |
|                  |                                                                                                                                                                                                              | B) Before milking cow                                      | <input type="text"/> |                                                                                                                            |
|                  |                                                                                                                                                                                                              | C) Before preparing dairy products                         | <input type="text"/> |                                                                                                                            |
| <b>ITMP1C_04</b> | How do you preserve the items on the right column?                                                                                                                                                           | A) Meat                                                    | <input type="text"/> | Refrigerate..... 1<br>Store in ice box to preserve ..... 2<br>Boil it ..... 3<br>Do not preserve ..... 4<br>Others ..... 5 |
|                  |                                                                                                                                                                                                              | B) Milk                                                    | <input type="text"/> |                                                                                                                            |
|                  |                                                                                                                                                                                                              | C) Dairy products                                          | <input type="text"/> |                                                                                                                            |
| <b>ITMP1C_05</b> | Do you have to frequently boil the items on the right to store it?<br>Enumerator: Only take the answer if the person boils the items to store it                                                             | A) Meat                                                    | <input type="text"/> | Yes ..... 1<br>No..... 2                                                                                                   |
|                  |                                                                                                                                                                                                              | B) Milk                                                    | <input type="text"/> |                                                                                                                            |
|                  |                                                                                                                                                                                                              | C) Dairy products                                          | <input type="text"/> |                                                                                                                            |

Household Number:

**Module ITMP1D: Preparing diversified dairy products (Male)**

| Question Number | Question                                      | Response             | Code                     |
|-----------------|-----------------------------------------------|----------------------|--------------------------|
| ITMP1D_01       | Do you prepare yoghurt (at household level)?  | <input type="text"/> | Yes ..... 1<br>No..... 2 |
| ITMP1D_02       | Do you prepare ghee (at household level)?     | <input type="text"/> | Yes ..... 1<br>No..... 2 |
| ITMP1D_0        | Do you make laban (only for processor level)? | <input type="text"/> | Yes ..... 1<br>No..... 2 |

**Module K1a: Agricultural technologies - dairy cows (milk) (Male)**

Recall period: For last 1 year, December 1 2017 to November 30 2018

| Serial                                                                                                                  | Question                                                                                  | Response                                                                   | Response Code                                                                                                                                                                                                            |
|-------------------------------------------------------------------------------------------------------------------------|-------------------------------------------------------------------------------------------|----------------------------------------------------------------------------|--------------------------------------------------------------------------------------------------------------------------------------------------------------------------------------------------------------------------|
| K1a_04                                                                                                                  | How many calves under one year old do you own?                                            | Number of calves:<br><input type="text"/>                                  | Write number of calves<br>Do not own any ..... 00                                                                                                                                                                        |
| K1a_03                                                                                                                  | How many male animals (bull/bullock/buffalo), that are at least one year old, do you own? | Number of adult males:<br><input type="text"/>                             | Write number of adult male<br>Do not own any ..... 00                                                                                                                                                                    |
| K1a_02                                                                                                                  | How many dairy cows do you own that are not milking?                                      | Number of non-milking cows:<br><input type="text"/>                        | Write number of non-milking cows<br>Do not own any ..... 00                                                                                                                                                              |
| K1a_01                                                                                                                  | How many dairy cows do you own that are milking?                                          | Number of milking cows:<br><input type="text"/>                            | Write number of miling cows<br>Do not own any ..... 00                                                                                                                                                                   |
| <i>If the answers to K1a 02 and K1a 01 are "0", i.e. if they do not keep any dairy cows, move on to the next module</i> |                                                                                           |                                                                            |                                                                                                                                                                                                                          |
| K1a_05                                                                                                                  | How do you acquire your milking cows?<br>[SELECT ALL THAT APPLY]                          | <input type="checkbox"/> <input type="checkbox"/> <input type="checkbox"/> | Farmer buys milking cows ..... 1<br>Farmer breeds milking cows ..... 2<br>Farmer gets cows as in-kind credit ..... 3<br>Received as gift / borga..... 4<br>Received through programs ..... 5<br>Other (specify) ..... 96 |

Household Number:

| Serial | Question                                                                                                                                                                                                                                                     | Response                                                             | Response Code                                                                                                                                                                                                                                             |
|--------|--------------------------------------------------------------------------------------------------------------------------------------------------------------------------------------------------------------------------------------------------------------|----------------------------------------------------------------------|-----------------------------------------------------------------------------------------------------------------------------------------------------------------------------------------------------------------------------------------------------------|
| K1a_06 | How do you breed your dairy cows?<br>[SELECT ALL THAT APPLY]                                                                                                                                                                                                 | <input type="text"/> <input type="text"/>                            | Natural Breeding ..... 1<br>Artificial Insemination ..... 2<br>Other (Specify)..... 96                                                                                                                                                                    |
| K1a_07 | <i>CHECK K1a_06: DOES RESPONDENT BREED COWS USING NATURAL BREEDING (RESPONSE '1')?</i>                                                                                                                                                                       | <input type="text"/>                                                 | Yes ..... 1<br>No..... 2> K1a_11                                                                                                                                                                                                                          |
| K1a_08 | How are bull services acquired to breed your dairy cows?<br>[SELECT ALL THAT APPLY]                                                                                                                                                                          | <input type="text"/> <input type="text"/> <input type="text"/>       | Bulls Selected from Own Herd ..... 1<br>Bulls Exchanged with Other Herds ..... 2<br>Bulls Purchased/Rented from Other Herds 3<br>Other (Specify).....96                                                                                                   |
| K1a_09 | How do you decide which bulls to choose for breeding your dairy cows and heifers?<br>[SELECT ALL THAT APPLY]                                                                                                                                                 | <input type="text"/> <input type="text"/> <input type="text"/>       | No selection - only one bull ..... 1<br>No selection - multiple bulls in herd ..... 2<br>Bull has good body size, composition..... 3<br>Bull is son of high-producing cow ..... 4<br>Bull known to have good fertility ..... 5<br>Other (specify) .....96 |
| K1a_10 | When decisions are made regarding which bull to choose for breeding your dairy cows and heifers, who is it that normally takes the decision?<br>[SELECT ALL THAT APPLY]<br><b>Record multiple responses only when there are more than one decision-maker</b> | <input type="text"/><br><input type="text"/><br><input type="text"/> | Self ..... 1<br>Partner/spouse ..... 2<br>Other household member ..... 3<br>Other non-household member ..... 4                                                                                                                                            |
| K1a_11 | <i>CHECK Q. K1a_06: DOES RESPONDENT USE ARTIFICIAL INSEMINATION SERVICES (RESPONSE '2')?</i>                                                                                                                                                                 | <input type="text"/>                                                 | Yes ..... 1<br>No..... 2>>K1a_13                                                                                                                                                                                                                          |
| K1a_12 | Where do you usually obtain artificial insemination services to breed your dairy cows?                                                                                                                                                                       | <input type="text"/>                                                 | Public veterinary services provider ..... 1<br>Community animal health worker ..... 2<br>Private services provider ..... 3<br>Private vet pharmacy ..... 4<br>Cooperatives ..... 5<br>Other (specify) ..... 96                                            |
| K1a_13 | Would you say that your dairy cows are mostly local, traditional breeds, or would you say that your dairy cows are mostly exotic, modern breeds?                                                                                                             | <input type="text"/>                                                 | Mostly local/traditional breeds..... 1<br>Mostly exotic/modern breeds ..... 2<br>Half local, half exotic ..... 3<br>Don't know ..... 8                                                                                                                    |
| K1a_14 | Which of the following is the best description of the housing for your dairy cows?                                                                                                                                                                           | <input type="text"/>                                                 | Kept in family housing ..... 1<br>No housing ..... 2                                                                                                                                                                                                      |

Household Number:

| Serial | Question                                                                                                                                                                                                                                                                                                                  | Response                                                                                                                                     | Response Code                                                                                                                                                                                                                                                                                                 |
|--------|---------------------------------------------------------------------------------------------------------------------------------------------------------------------------------------------------------------------------------------------------------------------------------------------------------------------------|----------------------------------------------------------------------------------------------------------------------------------------------|---------------------------------------------------------------------------------------------------------------------------------------------------------------------------------------------------------------------------------------------------------------------------------------------------------------|
|        |                                                                                                                                                                                                                                                                                                                           |                                                                                                                                              | Open corral only ..... 3<br>Roof only, no sides..... 4<br>Roof and sides, dirt floor..... 5<br>Roof and sides, concrete floor.....6                                                                                                                                                                           |
| K1a_15 | How do you usually supply water to your dairy cows?                                                                                                                                                                                                                                                                       | <input type="text"/>                                                                                                                         | Cattle drink from pond/pool..... 1<br>Cattle drink from creek/stream..... 2<br>Water brought to cattle by buckets..... 3<br>Water piped to cattle ..... 4<br>Other (specify) ..... 96                                                                                                                         |
| K1a_16 | Do your dairy cows graze?                                                                                                                                                                                                                                                                                                 | <input type="text"/>                                                                                                                         | Yes .....1<br>No.....2                                                                                                                                                                                                                                                                                        |
| K1a_17 | In the past one year, what forages have you fed your dairy cows?<br><br>Forages are crop, cereal or legume residues, and cultivated fodders.<br><br>[SELECT ALL THAT APPLY]                                                                                                                                               | <input type="text"/><br><input type="text"/><br><input type="text"/><br><input type="text"/><br><input type="text"/><br><input type="text"/> | None ..... 1<br>Conserved rice straw ..... 2<br>Conserved maize stover ..... 3<br>Legume haulms/stovers ..... 4<br>Forage legumes ..... 5<br>Napier grass ..... 6<br>Guinea grass ..... 7<br>Cut fresh grass ..... 8<br>Tree fodder (leaves, branches) ..... 9<br>Cereal ..... 10<br>Other (specify) ..... 96 |
| K1a_18 | Where did you get this fodder?<br><br>[SELECT ALL THAT APPLY]                                                                                                                                                                                                                                                             | <input type="text"/><br><input type="text"/><br><input type="text"/><br><input type="text"/>                                                 | Gathered from Roadside ..... 1<br>Weeds Pulled from Cropland ..... 2<br>Grass Grew Naturally ..... 3<br>Bought from Neighbor ..... 4<br>Bought from Market ..... 5<br>Own produce ..... 6<br>Other (Specify) .....96                                                                                          |
| K1a_19 | In the past one year, did you feed simple crop by-products to your dairy cows?<br>A simple crop by-product is a kind of supplemental feed that is made from the parts of a plant that are left over after the main crop is harvested, like stems or seed pods. Farmers can buy simple crop by-products or make their own. | <input type="text"/>                                                                                                                         | Yes ..... 1<br>No.....2>>K1a_23                                                                                                                                                                                                                                                                               |
| K1a_20 | How often do you feed simple crop by-products to your dairy cows?                                                                                                                                                                                                                                                         | <input type="text"/>                                                                                                                         | Daily..... 1<br>Weekly ..... 2<br>Monthly..... 3<br>Whenever available..... 4                                                                                                                                                                                                                                 |

Household Number:

| Serial | Question                                                                                                                                                                                                                                                                                                                                                                 | Response                                                                                                     | Response Code                                                                                                                                                                                                                                  |
|--------|--------------------------------------------------------------------------------------------------------------------------------------------------------------------------------------------------------------------------------------------------------------------------------------------------------------------------------------------------------------------------|--------------------------------------------------------------------------------------------------------------|------------------------------------------------------------------------------------------------------------------------------------------------------------------------------------------------------------------------------------------------|
|        |                                                                                                                                                                                                                                                                                                                                                                          |                                                                                                              | Other (specify) ..... 6                                                                                                                                                                                                                        |
| K1a_21 | <p>What kind of simple crop by-products did you feed to your dairy cows?</p> <p>[SELECT ALL THAT APPLY]</p>                                                                                                                                                                                                                                                              | <input type="checkbox"/><br><input type="checkbox"/><br><input type="checkbox"/><br><input type="checkbox"/> | Maize Bran ..... 1<br>Wheat Bran ..... 2<br>Molasses ..... 3<br>Fruit Or Vegetable Processing Waste ..... 4<br>Oilseed Cake ..... 5<br>Brewer's Grain ..... 6<br>Cottonseed Meal/Cake ..... 7<br>Rice Bran ..... 8<br>Other (Specify) ..... 96 |
| K1a_22 | <p>Where did you get the simple crop by-products you fed to your dairy cows?</p> <p>[SELECT ALL THAT APPLY]</p>                                                                                                                                                                                                                                                          | <input type="checkbox"/> <input type="checkbox"/><br><input type="checkbox"/> <input type="checkbox"/>       | Own Food Preparation ..... 1<br>Local Brewers ..... 2<br>Market ..... 3<br>Dairy Cooperative ..... 4<br>Other Cooperative ..... 5<br>Milk Purchaser (Not Coop) ..... 6<br>Local Agroveter Supplier ..... 7<br>Other (Specify) ..... 96         |
| K1a_23 | <p>In the past one year, did you feed mixed concentrates to your dairy cows?</p> <p>Mixed concentrates are special nutrient-rich feeds that are fed to dairy cows to increase milk production. They are usually a mixture of grains and cereals, and can include other nutrient-dense ingredients like brans, pomaces, or oil-seed cake. They are usually purchased.</p> | <input type="checkbox"/>                                                                                     | Yes ..... 1<br>No..... 2>>K1a_26                                                                                                                                                                                                               |
| K1a_24 | <p>How often do you feed mixed concentrates to your dairy cows?</p>                                                                                                                                                                                                                                                                                                      | <input type="checkbox"/>                                                                                     | Daily..... 1<br>Weekly ..... 2<br>Monthly..... 3<br>Whenever available..... 4<br>Other (specify) ..... 6                                                                                                                                       |
| K1a_25 | <p>Where did you get the mixed concentrates fed to your dairy cows?</p> <p>[SELECT ALL THAT APPLY]</p>                                                                                                                                                                                                                                                                   | <input type="checkbox"/><br><input type="checkbox"/><br><input type="checkbox"/>                             | Own production / prepared cereal foods ..... 1<br>Market ..... 2<br>Dairy Cooperative ..... 3<br>Other Cooperative ..... 4<br>Local Agroveter Supplier ..... 5<br>Milk Purchaser (Not Coop) ..... 6<br>Other (Specify) ..... 96                |

Household Number:

| Serial  | Question                                                                                                                                                                                                                                       | Response                                                             | Response Code                                                                                                                                                                                                                                  |
|---------|------------------------------------------------------------------------------------------------------------------------------------------------------------------------------------------------------------------------------------------------|----------------------------------------------------------------------|------------------------------------------------------------------------------------------------------------------------------------------------------------------------------------------------------------------------------------------------|
| K1a_26  | In the past one year, did you feed vitamins or minerals to your dairy cows, for example, salt, vitamins, or other kinds of mineral supplements?                                                                                                | <input type="text"/>                                                 | Yes ..... 1<br>No..... 2>>K1a_27                                                                                                                                                                                                               |
| K1a_26a | How often do you feed vitamins or minerals to your dairy cows?                                                                                                                                                                                 | <input type="text"/>                                                 | Daily..... 1<br>Weekly ..... 2<br>Monthly..... 3<br>Whenever available..... 4<br>Other (specify) ..... 6                                                                                                                                       |
| K1a_27  | What do you do with your cows' manure?                                                                                                                                                                                                         | <input type="text"/>                                                 | Yes, I collect it ..... 1<br>Nothing; leave it where it falls .. 2>> K1a_28                                                                                                                                                                    |
| K1a_27a | Do you dry the collected manure?                                                                                                                                                                                                               | <input type="text"/>                                                 | Yes ..... 1<br>No..... 2                                                                                                                                                                                                                       |
| K1a_27b | Where do you put the cows' manure after you collect it?                                                                                                                                                                                        | <input type="text"/>                                                 | Put in heap in uncovered area ..... 1<br>Put in heap in covered area ..... 2<br>Put in a pit/lagoon ..... 3<br>Put into a tank ..... 4<br>Put into a biogas-producing digester ..... 5<br>Other (specify) ..... 96                             |
| K1a_27c | What do you do with this collected manure?<br><br>[SELECT ALL THAT APPLY]                                                                                                                                                                      | <input type="text"/><br><input type="text"/><br><input type="text"/> | Nothing ..... 1<br>Household uses it for fuel ..... 2<br>Household puts on field as fertilizer ..... 3<br>Give it to friends/neighbors..... 4<br>Sell it to friends/neighbors ..... 5<br>Sell it at market ..... 6<br>Other (specify) ..... 96 |
| K1a_28  | In the past one year, did you obtain any health services from a trained provider for your dairy cows?<br><br>Examples of health services include things like vaccinations, treatments for sick animals, and assistance with delivery of calves | <input type="text"/>                                                 | Yes ..... 1<br>No..... 2>>K1a_30                                                                                                                                                                                                               |
| K1a_29  | From whom did you obtain these health services for your dairy cows?<br><br>[SELECT ALL THAT APPLY]                                                                                                                                             | <input type="text"/><br><input type="text"/><br><input type="text"/> | Self ..... 1<br>Community Animal Health Worker ..... 2<br>Government Extension Services ..... 3<br>Public Veterinarian ..... 4<br>Private Veterinarian ..... 5<br>Private Veterinary Pharmacy ..... 6<br>Other (Specify) ..... 96              |



Household Number:

| Serial  | Question                                                                                                                                                                      | Response                                                             |                                | Response Code                                                                                                                                                                                                                                         |
|---------|-------------------------------------------------------------------------------------------------------------------------------------------------------------------------------|----------------------------------------------------------------------|--------------------------------|-------------------------------------------------------------------------------------------------------------------------------------------------------------------------------------------------------------------------------------------------------|
| K1a_30  | In the past one year, have you given any medicines to your dairy cows, for example antibiotics, wormers, or external parasite treatments?                                     | <input type="text"/>                                                 |                                | Yes ..... 1<br>No..... 2>>K1a_32                                                                                                                                                                                                                      |
| K1a_31  | From where did you obtain these medicines you gave to your dairy cows?<br>[SELECT ALL THAT APPLY]                                                                             | <input type="text"/><br><input type="text"/><br><input type="text"/> |                                | Trader ..... 1<br>Dairy Cooperative ..... 2<br>Milk Purchaser (Not Coop) ..... 3<br>Community Animal Health Worker ..... 4<br>Local Agrovet Supplier ..... 5<br>Private Veterinary Pharmacy ..... 6<br>Government ..... 7<br>Other (Specify) ..... 96 |
| K1a_32  | How long does it take to obtain emergency animal health services when you need them?                                                                                          | Hour<br><input type="text"/>                                         | Minute<br><input type="text"/> | None Available ..... 99                                                                                                                                                                                                                               |
| K1a_33  | In the past one year, did you vaccinate none, some, or all of your cattle?                                                                                                    | <input type="text"/>                                                 |                                | No cattle vaccinated ..... 1>> K1a_34<br>Some cattle vaccinated..... 2<br>All cattle vaccinated..... 3                                                                                                                                                |
| K1a_33a | What vaccinations did you give to your dairy cows and calves in the past one year?<br>[SELECT ALL THAT APPLY]                                                                 | <input type="text"/><br><input type="text"/><br><input type="text"/> |                                | FMD (Foot and Mouth Disease) ..... 1<br>HS ..... 2<br>BQ ..... 3<br>Anthrax ..... 4<br>CBPP (Contagious Bovine Pleuropneumonia) 5<br>RVF (Rift Valley Fever) ..... 6<br>Other (Specify)..... 96                                                       |
| K1a_33b | When decisions are made regarding what vaccinations to give your dairy cows, who is it that normally takes the decision?<br>[SELECT ALL THAT APPLY]                           | <input type="text"/><br><input type="text"/>                         |                                | Self ..... 1<br>Partner/spouse ..... 2<br>Other household member ..... 3<br>Other non-household member ..... 4                                                                                                                                        |
| K1a_34  | Have you ever heard of mastitis?<br>Dairy cows sometimes experience a condition called mastitis, an inflammation of the cow's udder that reduces milk production and quality. | <input type="text"/>                                                 |                                | Yes ..... 1<br>No..... 2>>K1a_35                                                                                                                                                                                                                      |
| K1a_34a | Do you do anything to prevent mastitis in your dairy cows?                                                                                                                    | <input type="text"/>                                                 |                                | Yes ..... 1<br>No..... 2>>K1a_35                                                                                                                                                                                                                      |

Household Number:

| Serial  | Question                                                                                                                                                 | Response                                                                         | Response Code                                                                                                                                                                                                                                        |
|---------|----------------------------------------------------------------------------------------------------------------------------------------------------------|----------------------------------------------------------------------------------|------------------------------------------------------------------------------------------------------------------------------------------------------------------------------------------------------------------------------------------------------|
| K1a_34b | What do you do to prevent mastitis in your dairy cows?<br>[SELECT ALL THAT APPLY]                                                                        | <input type="checkbox"/><br><input type="checkbox"/><br><input type="checkbox"/> | Wash Udder ..... 1<br>Teat Dip ..... 2<br>Somatic Cell Counts ..... 3<br>Other (Specify) ..... 96                                                                                                                                                    |
| K1a_35  | Do you usually process some of your cows' milk into other products like cheese or yoghurt?                                                               | <input type="checkbox"/>                                                         | Yes ..... 1<br>No..... 2                                                                                                                                                                                                                             |
| K1a_36  | Do you sell your cows' milk?                                                                                                                             | <input type="checkbox"/>                                                         | Yes ..... 1<br>No..... 2                                                                                                                                                                                                                             |
| K1a_37  | Yesterday morning, how much milk in total did your dairy cows produce?                                                                                   | <input type="text"/>                                                             | Write quantity in liters<br>The dairy cow did not give milk ..... 00                                                                                                                                                                                 |
| K1a_38  | Yesterday evening, how much milk in total did your dairy cows produce?                                                                                   | <input type="text"/>                                                             | Write quantity in liters<br>The dairy cow did not give milk ..... 00                                                                                                                                                                                 |
| K1a_39  | ADD QUANTITIES IN ITEMS K1a_37 AND K1a_38.<br>Your dairy cows produced [QUANTITY] [UNITS] of milk yesterday. How many [UNITS] of that milk did you sell? | <input type="text"/>                                                             | Write quantity in liters<br>The dairy cow did not give milk ..... 00                                                                                                                                                                                 |
| K1a_40  | Where do you usually sell your milk?<br>[SELECT ALL THAT APPLY]                                                                                          | <input type="checkbox"/>                                                         | Sell to Friends/Neighbors ..... 1<br>Sell It at Market Myself ..... 2<br>Sell to A School ..... 3<br>Sell to A Milk Marketing Cooperative ..... 4<br>Sell to Aggregator/Off-Taker ..... 5<br>Do not Sell ..... 6> K1a_46<br>Other (Specify) ..... 96 |
| K1a_41  | At what time of the day do you usually sell milk?                                                                                                        | <input type="checkbox"/>                                                         | Only morning milk..... 1<br>Only evening milk..... 2<br>Both morning and evening milk..... 3                                                                                                                                                         |
| K1a_42  | <i>CHECK K1a_40: DOES FARMER SELL MILK TO A MILK MARKETING COOP (RESPONSE 4)?</i>                                                                        | <input type="checkbox"/>                                                         | Yes ..... 1<br>No..... 2>>K1a_45                                                                                                                                                                                                                     |
| K1a_43  | What services does your milk marketing cooperative provide you?<br>[SELECT ALL THAT APPLY]                                                               | <input type="checkbox"/><br><input type="checkbox"/><br><input type="checkbox"/> | Amount Of Milk Sold ..... 1<br>Fat Content Of Milk Sold ..... 2<br>Acidity Of Milk Sold ..... 3<br>Extension Services ..... 4<br>Animal Health Services ..... 5<br>Loans ..... 6                                                                     |

Household Number:

| Serial | Question                                                                                                                                                                                                                                   | Response                                                             | Response Code                                                                                                                                                                                                                                                                                                                                                                                                                      |
|--------|--------------------------------------------------------------------------------------------------------------------------------------------------------------------------------------------------------------------------------------------|----------------------------------------------------------------------|------------------------------------------------------------------------------------------------------------------------------------------------------------------------------------------------------------------------------------------------------------------------------------------------------------------------------------------------------------------------------------------------------------------------------------|
|        |                                                                                                                                                                                                                                            |                                                                      | Other (Specify) 96                                                                                                                                                                                                                                                                                                                                                                                                                 |
| K1a_44 | How do you receive payment for your milk from your cooperative?<br><br>[SELECT ALL THAT APPLY]                                                                                                                                             | <input type="text"/><br><input type="text"/><br><input type="text"/> | Cash ..... 1<br>Store Credit ..... 2<br>MPESA/Mobile Money ..... 3<br>Direct Deposit To Bank Account ..... 4<br>Other (Specify) ..... 96                                                                                                                                                                                                                                                                                           |
| K1a_45 | Do you keep daily written records on your dairy cows, for example how much each animal eats, what they eat, how much milk is produced, or when an animal is sold, born, or bought?                                                         | <input type="text"/>                                                 | Yes ..... 1<br>No..... 2                                                                                                                                                                                                                                                                                                                                                                                                           |
| K1a_46 | How do you decide when to sell one of your dairy cows?<br><br>[SELECT ALL THAT APPLY]                                                                                                                                                      | <input type="text"/><br><input type="text"/><br><input type="text"/> | When There Is A Need for Cash ..... 1<br>When Her Dam Is Poor-Performing ..... 2<br>When her milk production falls below a certain level 3<br>When She Doesn't Re-Breed ..... 4<br>When She Gets Too Old ..... 5<br>When Enough Heifers Expected to Produce More Milk Enter Herd ..... 6<br>When Herd Size Is Not Manageable ..... 7<br>When There Is Not Enough Food to Feed All of The Animals ..... 8<br>Other (Specify).....96 |
| K1a_47 | When decisions are made regarding selling a dairy cow, who is it that normally takes the decision?<br><br>[SELECT ALL THAT APPLY]                                                                                                          | <input type="text"/><br><input type="text"/>                         | Self..... 1<br>Partner/spouse ..... 2<br>Other household member ..... 3<br>Other non-household member ..... 4                                                                                                                                                                                                                                                                                                                      |
| K1a_48 | In the past year, how many of your dairy cows did you sell?                                                                                                                                                                                | <input type="text"/>                                                 | Record the number of females<br>Did not sell any ..... 00                                                                                                                                                                                                                                                                                                                                                                          |
| K1a_49 | In the past year, how many male animals (bull/bullock/buffalo) did you sell?                                                                                                                                                               | <input type="text"/>                                                 | Record the number of males<br>Did not sell any ..... 00                                                                                                                                                                                                                                                                                                                                                                            |
| K1a_50 | What information source do you rely on the most to help you raise your livestock well?<br><br><b>Module End Time:</b> <input type="text"/> Hour <input type="text"/> <input type="text"/> Minute <input type="text"/> <input type="text"/> | <input type="text"/>                                                 | Friend/neighbor..... 1<br>Community animal health worker..... 2<br>Local agroveterinarian..... 3<br>Private veterinary pharmacy ..... 4<br>Agricultural extension worker..... 5<br>School ..... 6<br>Radio program ..... 7<br>Television..... 8<br>Mobile phone messaging ..... 9<br>Internet ..... 10<br>Other (specify) ..... 96                                                                                                 |

Household Number:

**Module K2: Livestock and Poultry Products (Male)**

For last 1 year, December 1 2017 to November 30 2018.

Module start time: Hour   Minu

Respondent ID:  Consent :  Yes...1  
No....2

| Animal/Poultry Product | Unit name | How much did you produce in the last 12 months? |                                                                 | How much did you consume in the last 12 months? |                                                                 | How much did your household give to others? | How much did your household use for reproduction? | How much was spoilt? | How much was stored/used as stock? | How much did your household sell in the last 12 months? (if no sales >>next animal product) | Where did you sell your production? | Total value of selling | Who controls the money from the sale of livestock products?<br><br>Report 3 primary owners. If HH member, write MID. If outside household, use code 1. |            |        |        |
|------------------------|-----------|-------------------------------------------------|-----------------------------------------------------------------|-------------------------------------------------|-----------------------------------------------------------------|---------------------------------------------|---------------------------------------------------|----------------------|------------------------------------|---------------------------------------------------------------------------------------------|-------------------------------------|------------------------|--------------------------------------------------------------------------------------------------------------------------------------------------------|------------|--------|--------|
|                        |           | Quantity                                        | How much would you receive if you sold this product? (per unit) | Quantity                                        | How much would you receive if you sold this product? (per unit) |                                             |                                                   |                      |                                    |                                                                                             |                                     |                        |                                                                                                                                                        |            |        |        |
| Name                   | Code      | Unit                                            | Qty                                                             | Taka                                            | Qty                                                             | Taka                                        | Qty                                               | Qty                  | Qty                                | Qty                                                                                         | Qty                                 | Code 2                 | Tk                                                                                                                                                     | MID/Code 1 |        |        |
| Product Name           | BP Code   | K2_01                                           | K2_02                                                           | K2_03                                           | K2_04                                                           | K2_05                                       | K2_06                                             | K2_07                | K2_08                              | K2_09                                                                                       | K2_10                               | K2_11                  | K2_12                                                                                                                                                  | K2_13a     | K2_13b | K2_13c |
| Milk*                  | 1         | Liter                                           |                                                                 |                                                 |                                                                 |                                             |                                                   |                      |                                    |                                                                                             |                                     |                        |                                                                                                                                                        |            |        |        |
| Eggs (chicken)*        | 21        | Number                                          |                                                                 |                                                 |                                                                 |                                             |                                                   |                      |                                    |                                                                                             |                                     |                        |                                                                                                                                                        |            |        |        |
| Eggs (duck)*           | 22        | Number                                          |                                                                 |                                                 |                                                                 |                                             |                                                   |                      |                                    |                                                                                             |                                     |                        |                                                                                                                                                        |            |        |        |
| Manure*                | 3         | Kg                                              |                                                                 |                                                 |                                                                 |                                             |                                                   |                      |                                    |                                                                                             |                                     |                        |                                                                                                                                                        |            |        |        |

**Note:**\* Taka per unit sold.

| Code 1:                                | Code 2: Where sold                     |
|----------------------------------------|----------------------------------------|
| All members jointly .....71            | Farm gate (home) ..... 1               |
| Male outside household .....72         | Village market (within own village)2   |
| Female outside household.....73        | Village market (outside own village) 3 |
| Govt / Khas land/other institutions 74 | Town market .....4                     |
| Not applicable..... 98                 | Neither sold nor rented.....9          |
|                                        | Other (specify) .....5                 |

Household Number:

**Module K3: Expenditure for Livestock and Poultry Production (Male)**

For last 1 year, December 1 2017 to November 30 2018.

| Animal/Poultry          | Animal/Poultry Code | Fodder /feed bought (Tk) | Medicine/ treatment cost (Tk) | Labor use in person days |                |              |              |                |              | Other expenses if purchased (Tk) |
|-------------------------|---------------------|--------------------------|-------------------------------|--------------------------|----------------|--------------|--------------|----------------|--------------|----------------------------------|
|                         |                     |                          |                               | Family*                  |                | Hired*       |              | Hired*         |              |                                  |
|                         |                     |                          |                               | Male (hours)             | Female (hours) | Male (hours) | Total cost   | Female (hours) | Total cost   |                                  |
| <b>Name</b>             | <b>K3_01</b>        | <b>K3_02</b>             | <b>K3_03</b>                  | <b>K3_04</b>             | <b>K3_05</b>   | <b>K3_06</b> | <b>K3_07</b> | <b>K3_08</b>   | <b>K3_09</b> | <b>K3_10</b>                     |
| Cow/Bullock/Buffalo     | 1                   |                          |                               |                          |                |              |              |                |              |                                  |
| Goat/Sheep/Pig          | 2                   |                          |                               |                          |                |              |              |                |              |                                  |
| Chicken/Duck/Birds      | 3                   |                          |                               |                          |                |              |              |                |              |                                  |
| Others (please specify) | 4                   |                          |                               |                          |                |              |              |                |              |                                  |

Note: \* Include adult and child labor.

Round hours to the whole number. Report "0" only if no labor has been used. For e.g. if plot is weeded for 15 min report 1 hour and not "0".

| SI no        | Question                                      | Response             | Response Code                                                                                                                                                                                                    |
|--------------|-----------------------------------------------|----------------------|------------------------------------------------------------------------------------------------------------------------------------------------------------------------------------------------------------------|
| <b>K3_11</b> | Where did you hire most of the laborers from? | <input type="text"/> | From farm/home..... 1<br>Village market (within own village).... 2<br>Village market (outside own village) ... 3<br>City market..... 4<br>Others (please specify) ..... 5<br>Neither purchased nor rented..... 9 |

Module End Time:  Hour   Minute





Household Number:

| Code 1: Fish Codes  |                           |                               | Code 2: Reason of loss code | Code 3: Where sold                                 |
|---------------------|---------------------------|-------------------------------|-----------------------------|----------------------------------------------------|
| Silver carp ..... 1 | Telapia/Nailotica..... 10 | Prawn (Golda Chingri)..... 18 | Flood..... 1                | Farm gate (home)..... 1                            |
| Grass carp..... 2   | Pona ..... 11             | Shrimp (Bagda Chingri).... 19 | Water Toxicity..... 2       | Village market (within<br>own village) ..... 2     |
| Mirror carp ..... 3 | Koi ..... 12              | Tengra/Baim ..... 20          | Theft ..... 3               | Village market (outside of<br>own village) ..... 3 |
| Common carp..... 4  | Magur ..... 13            | Mola/Dhela/Kachki/Chapila 21  | Due to cold ..... 4         | Town market..... 4                                 |
| Karfu ..... 5       | Shingi..... 14            | Ilish/hilsha..... 22          | Other (Specify) ..... 5     | Neither sold nor rented ..... 5                    |
| Rui..... 6          | Khalse ..... 15           | Other Large fish ..... 23     |                             | Other (specify) ..... 9                            |
| Katla..... 7        | Shol/Gajar/Taki ..... 16  | Other Small fish ..... 24     |                             |                                                    |
| Mrigel..... 8       | Puti/Swarputi ..... 17    | Sea fish..... 25              |                             |                                                    |
| Kalibaus ..... 9    |                           | Pangash ..... 26              |                             |                                                    |

Module End Time: Hour   Minute

**Module ITMP2B: Improved Hatchery Management Technology (Male)**

Module start time: Hour   Minu   Respondent ID:  Consent :  Yes ... 1  
No..... 2

| Question number | Questions                                                | Response             |                      | Response codes                                                                                                         |
|-----------------|----------------------------------------------------------|----------------------|----------------------|------------------------------------------------------------------------------------------------------------------------|
|                 |                                                          | Tilapia              | Carp                 |                                                                                                                        |
| ITMP2B_01       | Does your hh have any hatchery/ Do you produce fish fry? |                      |                      | Yes=1<br>No=2>> Next Module<br><br>If the respondent does not produce either Tilapia or Carp, move to the next module. |
| ITMP2B_02       | What is the stocking density?                            | <input type="text"/> | <input type="text"/> | (Piece/decimal)<br>Write the number of fingerling per decimal                                                          |
| ITMP2B_03       | What is the depth of water at brood ponds?               | <input type="text"/> | <input type="text"/> | Foot                                                                                                                   |
| ITMP2B_04       | What water PH level do you need to maintain?             | <input type="text"/> | <input type="text"/> | PH Level                                                                                                               |
| ITMP2B_05       | How many times do you exchange water?                    | <input type="text"/> | <input type="text"/> | Once every month.....1<br>Once every two months.....2<br>When required.....3<br>Do not exchange water.....4            |



Household Number:

| Question number | Questions                                                            | Response             |                      | Response codes                                                                                                                                                 |
|-----------------|----------------------------------------------------------------------|----------------------|----------------------|----------------------------------------------------------------------------------------------------------------------------------------------------------------|
|                 |                                                                      | Tilapia              | Carp                 |                                                                                                                                                                |
| ITMP2B_06       | What percentage of water do you exchange?                            |                      |                      | Percentage                                                                                                                                                     |
| ITMP2B_07       | What percentage of protein is used in feed?                          | <input type="text"/> | <input type="text"/> | Percentage<br>Don't Know.....999                                                                                                                               |
| ITMP2B_08       | What is the feed application rate?                                   | <input type="text"/> | <input type="text"/> | 1-1.5% of body weight.....1<br>1.5-2% of body weight.....2<br>2-3% of body weight (1-1.5% immediate before breeding).....3<br>Others.....4<br>Don't know.....5 |
| ITMP2B_09       | During the production of fish fry, do you use cow dung in your pond? | <input type="text"/> | <input type="text"/> | Use it.....1<br>Do not use it.....2                                                                                                                            |
| ITMP2B_10       | If yes, what amount of it do you use every week?                     | <input type="text"/> | <input type="text"/> | (Gram/Decimal)<br>*Write the amount used every week in grams per decimal                                                                                       |
| ITMP2B_11       | During the production of fish fry, do you use urea in your pond?     | <input type="text"/> | <input type="text"/> | Use it.....1<br>Do not use it.....2                                                                                                                            |
| ITMP2B_12       | If yes, what amount of it do you use every week?                     | <input type="text"/> | <input type="text"/> | (Gram/Decimal)<br>*Write the amount used every week in grams per decimal                                                                                       |
| ITMP2B_13       | During the production of fish fry, do you use TSP in your pond?      | <input type="text"/> | <input type="text"/> | Use it.....1<br>Do not use it.....2                                                                                                                            |
| ITMP2B_14       | If yes, what amount of it do you use every week?                     | <input type="text"/> | <input type="text"/> | (Gram/Decimal)<br>*Write the amount used every week in grams per decimal                                                                                       |
| ITMP2B_15       | How often do you observe netting and health conditions?              | <input type="text"/> | <input type="text"/> | 1-2 times each month.....1<br>2-3 times each month.....2<br>Don't observe.....3                                                                                |
| ITMP2B_16       | What ratio do you maintain for Male: Female brood?                   | <input type="text"/> | <input type="text"/> | 1:2.....1<br>1:3.....2<br>2:3.....3<br>Others (specify).....4<br>Don't know.....5                                                                              |

Household Number:

| Question number | Questions                                                | Response             |                      | Response codes                            |
|-----------------|----------------------------------------------------------|----------------------|----------------------|-------------------------------------------|
|                 |                                                          | Tilapia              | Carp                 |                                           |
| ITMP2B_17       | Does it require to take care of the aeration facilities? | <input type="text"/> | <input type="text"/> | Yes.....1<br>No.....2<br>Don't know.....3 |

Module End Time:  Hour   Minute

Household Number:

**Module ITMP2C: Nursery Technologies (Male)**

Module start time: Hour   Minu

Respondent ID:  Consent :  Yes ...1  
No.....2

| Question number | Questions                                                           | Response             |                      |                      | Response Code                                                                                                                                      |
|-----------------|---------------------------------------------------------------------|----------------------|----------------------|----------------------|----------------------------------------------------------------------------------------------------------------------------------------------------|
|                 | Key management features                                             | Carp                 | Shrimp               | Prawn                |                                                                                                                                                    |
| ITMP2C_01       | Do you have a fish nursery?                                         | <input type="text"/> | <input type="text"/> | <input type="text"/> | Yes.....1<br>No .....2>>Next Module<br><br>If the household does not have a nursery of either carp. shrimp and prawn then move to the next module. |
| ITMP2C_02       | How do you build your pond dike?                                    | <input type="text"/> | <input type="text"/> | <input type="text"/> | Well prepared.....1<br>Not well prepared.....2<br>Not applicable (Prepared from before) ..... 3<br>Others (Specify)..... 4                         |
| ITMP2C_03       | How does the water entrance need to be?                             | <input type="text"/> | <input type="text"/> | <input type="text"/> | Deep water..... 1<br>Canal water ..... 2<br>Not applicable (There is water all year round) 3<br>Others (Specify)..... 4                            |
| ITMP2C_04       | Do you need to completely or partially control the aquatic weed?    | <input type="text"/> | <input type="text"/> | <input type="text"/> | Yes..... 1<br>No ..... 2                                                                                                                           |
| ITMP2C_05       | Do you remove predators and non-culture fish from the farming area? | <input type="text"/> | <input type="text"/> | <input type="text"/> | Completely removes ..... 1<br>Partially removes ..... 2<br>Do not remove ..... 3                                                                   |
| ITMP2C_06       | What amount of lime do you use in your pond per decimal?            | <input type="text"/> | <input type="text"/> | <input type="text"/> | (kilogram/decimal)                                                                                                                                 |
| ITMP2C_07       | Do you put bleach in the nursery?                                   | <input type="text"/> | <input type="text"/> | <input type="text"/> | Yes..... 1<br>No ..... 2                                                                                                                           |
| ITMP2C_08       | Do you use fencing with net?                                        | <input type="text"/> | <input type="text"/> | <input type="text"/> | Yes, Always use it ..... 1<br>Yes, use it sometimes ..... 2<br>No, never use it ..... 3                                                            |
| ITMP2C_09       | How do you control harmful insect?                                  | <input type="text"/> | <input type="text"/> | <input type="text"/> | Yes, used Sumethion ..... 1<br>Yes, used kerosene/diesel ..... 2<br>No, do not use anything to control harmful insects 3                           |
| ITMP2C_10       | Do you use fertilizer before stocking?                              | <input type="text"/> | <input type="text"/> | <input type="text"/> | Yes, use it ..... 1<br>Yes, use it but not in the right quantity ..... 2<br>No, never use it.....3                                                 |

Household Number:

| Question number | Questions                                                | Response                              |                                       |                                       | Response Code                                                                                                                                                                                                   |
|-----------------|----------------------------------------------------------|---------------------------------------|---------------------------------------|---------------------------------------|-----------------------------------------------------------------------------------------------------------------------------------------------------------------------------------------------------------------|
|                 |                                                          | Carp                                  | Shrimp                                | Prawn                                 |                                                                                                                                                                                                                 |
|                 | Key management features                                  |                                       |                                       |                                       |                                                                                                                                                                                                                 |
| ITMP2c_11       | Do you observe natural feeding in the pond?              | <input type="text"/>                  | <input type="text"/>                  | <input type="text"/>                  | Yes, I observe ..... 1<br>Yes, but not in the right manner ..... 2<br>No, I do not observe..... 3                                                                                                               |
| ITMP2c_12       | Do you carry out toxicity test?                          | <input type="text"/>                  | <input type="text"/>                  | <input type="text"/>                  | Yes, carry out toxicity test ..... 1<br>No, do not carry out toxicity test ..... 2<br>No, can predict if the pond has become toxic (from the way fishes behave to toxicity/fishes float on the surface) ..... 3 |
| ITMP2c_13       | Do you properly acclimatize the pond?                    | <input type="text"/>                  | <input type="text"/>                  | <input type="text"/>                  | Yes ..... 1<br>No ..... 2                                                                                                                                                                                       |
| ITMP2c_14       | What is the stocking density?                            | Gram/Decimal<br><input type="text"/>  | Gram/Decimal<br><input type="text"/>  | Gram/Decimal<br><input type="text"/>  | Gram/Decimal<br><br>Piece/Decimal                                                                                                                                                                               |
|                 |                                                          | Piece/Decimal<br><input type="text"/> | Piece/Decimal<br><input type="text"/> | Piece/Decimal<br><input type="text"/> |                                                                                                                                                                                                                 |
| ITMP2c_15       | Do you test the water quality?<br>(Different parameters) | <input type="text"/>                  | <input type="text"/>                  | <input type="text"/>                  | Yes, the quality of water is tested ..... 1<br>No, the quality of water is not tested ..... 2                                                                                                                   |
| ITMP2c_16       | Do you observe survivals of fishes?                      | <input type="text"/>                  | <input type="text"/>                  | <input type="text"/>                  | Yes ..... 1<br>No ..... 2                                                                                                                                                                                       |
| ITMP2c_17       | Do you maintain sampling as a routine work?              | <input type="text"/>                  | <input type="text"/>                  | <input type="text"/>                  | Yes ..... 1<br>No ..... 2                                                                                                                                                                                       |

Household Number:

| Question number | Questions                                             | Response             |                      |                      | Response Code                                                                                                                                                    |
|-----------------|-------------------------------------------------------|----------------------|----------------------|----------------------|------------------------------------------------------------------------------------------------------------------------------------------------------------------|
|                 |                                                       | Carp                 | Shrimp               | Prawn                |                                                                                                                                                                  |
|                 | Key management features                               |                      |                      |                      |                                                                                                                                                                  |
| ITMP2c_18       | What is the nursery water treated with?               | <input type="text"/> | <input type="text"/> | <input type="text"/> | Treated with bleaching powder.....1<br>Treated with lime.....2<br>Used TINSON ..... 3<br>Used Zeolite..... 4<br>Others (Specify)..... 5<br>Not applicable..... 6 |
| ITMP2c_19       | How is the reservoir water treated?                   | <input type="text"/> | <input type="text"/> | <input type="text"/> | Water is disinfected with lime ..... 1<br>Water is disinfected with bleaching powder 2<br>Others (Specify)..... 3<br>Not applicable..... 4                       |
| ITMP2c_20       | Does it require in-let/Out-let system in the nursery? | <input type="text"/> | <input type="text"/> | <input type="text"/> | Yes.....1<br>No, there was no need of one.....2<br>No, inlet/outlet.....3                                                                                        |
| ITMP2c_21       | Is WSSV negative screened PLs/spawn stocking?         | <input type="text"/> | <input type="text"/> | <input type="text"/> | Yes, screened PLs (MTT and CST gher) before stocking.....1<br>No, screened PLs (MTT and CST gher) before stocking.....2<br>Not applicable.....3                  |
| ITMP2c_22       | How much supplementary feed is used?                  | <input type="text"/> | <input type="text"/> | <input type="text"/> | 2-7 percent of body weight.....1<br>10 percent of body weight.....2<br>Others (Specify).....3                                                                    |
| ITMP2c_23       | What is the culture period?                           | <input type="text"/> | <input type="text"/> | <input type="text"/> | 15-20 days.....1<br>15-30 days.....2<br>30-60 days.....3<br>45-60 days.....4<br>More than 60 days.....5                                                          |
| ITMP2c_24       | Is horra pulling required?                            | <input type="text"/> | <input type="text"/> | <input type="text"/> | Applies regularly.....1<br>When need.....2                                                                                                                       |

Module End Time:  Hour   Minute

Household Number:

**Module ITMP2A: TILAPIA/ Silver carp/Katla and Other Varieties of Fish Farming Technologies (Male)**

If the household has more than one pond, then take the answers concerning majority of the ponds

Module start time: Hour   Minu

Respondent ID:  Consent :  Yes ...1  
No....2

| Question number | Questions                                                           | Response             |                      |                         | Response Code                                                                                                                                               |
|-----------------|---------------------------------------------------------------------|----------------------|----------------------|-------------------------|-------------------------------------------------------------------------------------------------------------------------------------------------------------|
|                 |                                                                     | Tilapia              | Carp/Katla           | Other Varieties of Fish |                                                                                                                                                             |
|                 | Key management features                                             |                      |                      |                         |                                                                                                                                                             |
| ITMP2A_01       | Are you involved in fish farming?                                   | <input type="text"/> | <input type="text"/> | <input type="text"/>    | Yes ..... 1<br>No .....2>> Next Module                                                                                                                      |
| ITMP2A_02       | If yes, what is the main reason of fish farming?                    | <input type="text"/> | <input type="text"/> | <input type="text"/>    | For consumption purpose..... 1<br>To sell ..... 2<br>Both consume and sell ..... 3                                                                          |
| ITMP2A_03       | How do you build your pond dike?                                    | <input type="text"/> | <input type="text"/> | <input type="text"/>    | Moderately raised.....1<br>Dikes are cleaned and compacted to prevent entry of disease contaminated outside water.....2<br>Don't know.....3<br>Others.....4 |
| ITMP2A_04       | Do you use fencing with net in your pond?                           | <input type="text"/> | <input type="text"/> | <input type="text"/>    | No Barrier.....1<br>Barriers are established to prevent entering the pond.....2<br>Don't know.....3                                                         |
| ITMP2A_05       | Do you remove predators and non-culture fish from the farming area? | <input type="text"/> | <input type="text"/> | <input type="text"/>    | Yes, completely remove.....1<br>Yes, partially removes.....2<br>No, do not remove.....3                                                                     |
| ITMP2A_06       | Do you use lime in your pond?                                       | <input type="text"/> | <input type="text"/> | <input type="text"/>    | Yes ..... 1<br>No ..... 2>>ITMP2A_08                                                                                                                        |
| ITMP2A_07       | If yes, how much lime do you use per decimal?                       | <input type="text"/> | <input type="text"/> | <input type="text"/>    | Kg/decimal                                                                                                                                                  |
| ITMP2A_08       | Do you use fertilizer in your pond?                                 | <input type="text"/> | <input type="text"/> | <input type="text"/>    | Very less ..... 1<br>Proper amount..... 2<br>Do not use ..... 3>>ITMP2A_13                                                                                  |
| ITMP2A_09       | Do you use urea?                                                    | <input type="text"/> | <input type="text"/> | <input type="text"/>    | Use it..... 1<br>Do not use it..... 2>>ITMP2A_11                                                                                                            |
| ITMP2A_10       | If yes, how much urea do you use per decimal?                       | <input type="text"/> | <input type="text"/> | <input type="text"/>    | Gram/decimal                                                                                                                                                |

Household Number:

| Question number | Questions                                                                                 | Response                                 |                                          |                                          | Response Code                                                                                                                                      |
|-----------------|-------------------------------------------------------------------------------------------|------------------------------------------|------------------------------------------|------------------------------------------|----------------------------------------------------------------------------------------------------------------------------------------------------|
|                 |                                                                                           | Tilapia                                  | Carp/Katla                               | Other Varieties of Fish                  |                                                                                                                                                    |
|                 | Key management features                                                                   |                                          |                                          |                                          |                                                                                                                                                    |
| ITMP2A_11       | Do you use TSP?                                                                           | <input type="text"/>                     | <input type="text"/>                     | <input type="text"/>                     | Use it..... 1<br>Do not use it..... 2>>ITMP2A_13                                                                                                   |
| ITMP2A_12       | If yes, how much TSP do you use per decimal?                                              | <input type="text"/>                     | <input type="text"/>                     | <input type="text"/>                     | Gram/decimal                                                                                                                                       |
| ITMP2A_13       | Do you use cow dung?                                                                      | <input type="text"/>                     | <input type="text"/>                     | <input type="text"/>                     | Yes ..... 1<br>No ..... 2>>ITMP2A_15                                                                                                               |
| ITMP2A_14       | If yes, how much cow dung do you use per decimal?                                         | Kg/decimal<br><input type="text"/>       | Kg/decimal<br><input type="text"/>       | Kg/decimal<br><input type="text"/>       | Kg/decimal                                                                                                                                         |
| ITMP2A_15       | Do you carry out toxicity test?                                                           | <input type="text"/>                     | <input type="text"/>                     | <input type="text"/>                     | Yes, recently.....1<br>Yes, but long time ago.....2<br>No, never carried out the test.....3                                                        |
| ITMP2A_16       | What is the size of the fingerlings in your pond?<br><br>(Considering most of your ponds) | Length in inches<br><input type="text"/> | Length in inches<br><input type="text"/> | Length in inches<br><input type="text"/> | Length in inches                                                                                                                                   |
| ITMP2A_17       | What is the stocking density of the fingerlings?                                          | <input type="text"/>                     | <input type="text"/>                     | <input type="text"/>                     | Piece/decimal<br>(Write the number)                                                                                                                |
| ITMP2A_18       | Do you take measures to purify fingerlings?                                               | <input type="text"/>                     | <input type="text"/>                     | <input type="text"/>                     | Yes ..... 1<br>No ..... 2                                                                                                                          |
| ITMP2A_19       | Do you properly acclimatize the pond?                                                     | <input type="text"/>                     | <input type="text"/>                     | <input type="text"/>                     | Not properly.....1<br>Absolutely maintaining.....2                                                                                                 |
| ITMP2A_20       | Do you fertilize the pond post stocking?                                                  | <input type="text"/>                     | <input type="text"/>                     | <input type="text"/>                     | Yes, sometimes ..... 1<br>Yes, doing it continuously ..... 2<br>No ..... 3                                                                         |
| ITMP2A_21       | Do you provide supplementary feed to the fish?                                            | <input type="text"/>                     | <input type="text"/>                     | <input type="text"/>                     | Provide properly and regularly ..... 1<br>Occasionally ..... 2<br>Do not provide properly ..... 3<br>No, do not provide supplementary feed ..... 4 |

Household Number:

| Question number | Questions                                                        | Response                                                         |                                                                  |                                                                  | Response Code                                                                                                                                                                                                         |
|-----------------|------------------------------------------------------------------|------------------------------------------------------------------|------------------------------------------------------------------|------------------------------------------------------------------|-----------------------------------------------------------------------------------------------------------------------------------------------------------------------------------------------------------------------|
|                 |                                                                  | Tilapia                                                          | Carp/Katla                                                       | Other Varieties of Fish                                          |                                                                                                                                                                                                                       |
|                 | Key management features                                          |                                                                  |                                                                  |                                                                  |                                                                                                                                                                                                                       |
| ITMP2A_22       | Do you maintain sampling as a routine work?                      | <input type="text"/>                                             | <input type="text"/>                                             | <input type="text"/>                                             | Yes ..... 1<br>No ..... 2                                                                                                                                                                                             |
| ITMP2A_23       | How many times do you harvest in a year?                         | <input type="text"/>                                             | <input type="text"/>                                             | <input type="text"/>                                             | Write the number of times<br>If not once, write "0"                                                                                                                                                                   |
| ITMP2A_24       | How many times do you completely harvest and empty out the pond? | <input type="text"/>                                             | <input type="text"/>                                             | <input type="text"/>                                             | Several times in a year ..... 1<br>Once every year ..... 2<br>Once in every two years ..... 3<br>Once in every three years ..... 4<br>Once in every four years ..... 5<br>Never completely empty out the pond ..... 6 |
| ITMP2A_25       | Do you have in-let/Out-let in your farming area?                 | <input type="text"/>                                             | <input type="text"/>                                             | <input type="text"/>                                             | Yes, currently have inlets/outlets ..... 1<br>No, build it when necessary ..... 2<br>No, no inlets/outlets ..... 3                                                                                                    |
| ITMP2A_26       | How often do you exchange water in your pond?                    | <input type="text"/>                                             | <input type="text"/>                                             | <input type="text"/>                                             | Very few times ..... 1<br>Do it when needed ..... 2<br>Do not exchange water in the pond ..... 3                                                                                                                      |
| ITMP2A_27       | Do you keep records?                                             | <input type="text"/>                                             | <input type="text"/>                                             | <input type="text"/>                                             | Yes, accurately ..... 1<br>Yes, but not accurately ..... 2<br>No, don't keep records ..... 3                                                                                                                          |
| ITMP2A_28       | What is the marketing size of the fish?                          | <input type="text"/><br>Weight<br><input type="text"/><br>Length | <input type="text"/><br>Weight<br><input type="text"/><br>Length | <input type="text"/><br>Weight<br><input type="text"/><br>Length | Weight (Gram/piece)<br>Length (Gram/Piece)                                                                                                                                                                            |
| ITMP2A_29       | How much do you produce per cycle (3-4 months)?                  | <input type="text"/>                                             | <input type="text"/>                                             | <input type="text"/>                                             | Kg                                                                                                                                                                                                                    |



Household Number:

| Question number | Questions                                 | Response                           |                                    |                                    | Response Code |
|-----------------|-------------------------------------------|------------------------------------|------------------------------------|------------------------------------|---------------|
|                 |                                           | Tilapia                            | Carp/Katla                         | Other Varieties of Fish            |               |
| ITMP2A_30       | How much fish do you produce per decimal? | Kg/decimal<br><input type="text"/> | Kg/decimal<br><input type="text"/> | Kg/decimal<br><input type="text"/> | (Kg/decimal)  |

Module End Time: Hour   Minute

**Module L2a: Agricultural Technologies - Fishpond Aquaculture (Male)**

Recall period: For last 1 year, December 1 2017 to November 30 2018

Module start time: Hour   Minu   Respondent ID:  Consent :  Yes ...1 No....2

| Question number | Questions                                                                                                                                                                                                                                                                                                                                       | Response                                              | Response Code                                                                                                                                                                                                                                                                                                                       |
|-----------------|-------------------------------------------------------------------------------------------------------------------------------------------------------------------------------------------------------------------------------------------------------------------------------------------------------------------------------------------------|-------------------------------------------------------|-------------------------------------------------------------------------------------------------------------------------------------------------------------------------------------------------------------------------------------------------------------------------------------------------------------------------------------|
| L2a_01          | Were you or any of your family member involved in fish farming in the period December 1, 2017 to November 30, 2018)                                                                                                                                                                                                                             | <input type="text"/>                                  | Yes ..... 1<br>No.....2>>Next module                                                                                                                                                                                                                                                                                                |
| L2a_01a         | How many fish fries/ fingerlings in total have you stocked in the recall period??<br><br>Note: If the farmer was involved in <b>fish fry</b> farming, then record the <b>weight in gram</b> of the fish fries. If the farmer was involved in <b>fingerling</b> farming, then record the <b>number of fingerlings stocked</b> of the fish fries. | Gram <input type="text"/> Number <input type="text"/> | Total weight/number of fish fry/finegrlings stocked                                                                                                                                                                                                                                                                                 |
| L2a_02a         | What was the main source of fish you stocked in the recall period?                                                                                                                                                                                                                                                                              | <input type="text"/>                                  | Raised own, received from friends/relatives (Not purchased) ..... 1>>L2a_03<br>Purchased from friends/relatives ..... 2>>L2a_03<br>Purchased from the market..... 3<br>Purchased from local vendor..... 4<br>Purchased from local hatchery ..... 5<br>Purchased from non-local hatchery.....6<br>Received it as aid ..... 7>>L2a_03 |

Household Number:

|                |                                                                                                                                                      |                                                                                              |                                                                                                                                                                                                      |
|----------------|------------------------------------------------------------------------------------------------------------------------------------------------------|----------------------------------------------------------------------------------------------|------------------------------------------------------------------------------------------------------------------------------------------------------------------------------------------------------|
|                |                                                                                                                                                      |                                                                                              | Others (Specify) ..... 96>>L2a_03                                                                                                                                                                    |
| <b>L2a_02c</b> | Was the hatchery where you purchased your fish fry and fingerling a registered or certified hatchery?                                                | <input type="text"/>                                                                         | Yes ..... 1<br>No..... 2<br>Don't know ..... 8                                                                                                                                                       |
| <b>L2a_03</b>  | Where do you raise your fish? In a man-made earthen pond, a raceway, a natural pond, a stream, or somewhere else?<br><br>[Multiple response allowed] | <input type="text"/><br><input type="text"/><br><input type="text"/>                         | Man-made earthen pond..... 1<br>Raceway ..... 2<br>Natural pond/lake ..... 3<br>Stream ..... 4<br>Others (Specify) ..... 96                                                                          |
| <b>L2a_04</b>  | In the last one year, did you give your fish supplemental feed?                                                                                      | <input type="text"/>                                                                         | Yes ..... 1<br>No..... 2> L2a_06                                                                                                                                                                     |
| <b>L2a_05</b>  | Where did you get most of the supplemental feed you gave to your fish - did you make it yourself or did you buy it?                                  | <input type="text"/>                                                                         | Mostly made own supplementary fish feed. 1<br>Mostly purchaed supplementary fish feed .. 2<br>Half made and half purchased..... 3                                                                    |
| <b>L2a_06</b>  | In the last one year, did you use hormones to raise your fish?                                                                                       | <input type="text"/>                                                                         | Yes ..... 1<br>No..... 2> L2a_08                                                                                                                                                                     |
| <b>L2a_07</b>  | At what stage of growth did you apply the hormone to the fish?<br><br>[Multiple response allowed]                                                    | <input type="text"/> <input type="text"/> <input type="text"/>                               | Initial growth phase (First 28 days) ..... 1<br>Development phase ..... 2<br>Others (Specify) ..... 96                                                                                               |
| <b>L2a_08</b>  | Have you been formally trained in the use of hormones for fish farming?                                                                              | <input type="text"/>                                                                         | Yes ..... 1<br>No..... 2                                                                                                                                                                             |
| <b>L2a_09</b>  | What kind of fish did you raise in the last one year?<br><br>[Multiple response allowed]                                                             | <input type="text"/><br><input type="text"/><br><input type="text"/><br><input type="text"/> | <b>Use the fish code from L1</b><br><br>Don't know ..... 96                                                                                                                                          |
| <b>L2a_10</b>  | Did you observe any disease among your fish in the last one year?                                                                                    | <input type="text"/>                                                                         | Yes ..... 1<br>No..... 2                                                                                                                                                                             |
| <b>L2a_10a</b> | Did you do anything to control disease among your fish in the last one year?                                                                         | <input type="text"/>                                                                         | Yes ..... 1<br>No..... 2> L2a_11                                                                                                                                                                     |
| <b>L2a_10b</b> | What did you do to control disease among your fish?<br>[Multiple response allowed]                                                                   | <input type="text"/><br><input type="text"/><br><input type="text"/>                         | Nothing ..... 1<br>Apply salt ..... 2<br>Apply formalin..... 3<br>Apply malachite green ..... 4<br>Apply methayl blue ..... 5<br>Antibiotics/Antibioic treated feed ..... 6<br>Applying lime ..... 7 |

Household Number:

|                |                                                                                                             |                                                                      |                                                                                                                                                                                                                                                              |
|----------------|-------------------------------------------------------------------------------------------------------------|----------------------------------------------------------------------|--------------------------------------------------------------------------------------------------------------------------------------------------------------------------------------------------------------------------------------------------------------|
|                |                                                                                                             |                                                                      | Applying Potash..... 8<br>Others (Specify)..... 96                                                                                                                                                                                                           |
| <b>L2a_11</b>  | Did you observe any parasite cases among your fish in the last one year?                                    | <input type="text"/>                                                 | Yes ..... 1<br>No..... 2                                                                                                                                                                                                                                     |
| <b>L2a_11a</b> | Did you do anything to control parasites among your fish in the last one year?                              | <input type="text"/>                                                 | Yes ..... 1<br>No..... 2 > <b>L2a_12</b>                                                                                                                                                                                                                     |
| <b>L2a_11b</b> | What did you do to control parasites among your fish?<br><br>[Multiple response allowed]                    | <input type="text"/>                                                 | Nothing ..... 1<br>Apply salt ..... 2<br>Apply formalin ..... 3<br>Apply malachite green ..... 4<br>Apply methayl blue ..... 5<br>Antibiotics/Antibioic treated feed ..... 6<br>Applying lime ..... 7<br>Applying Potash ..... 8<br>Others (Specify)..... 96 |
| <b>L2a_12</b>  | Did you monitor the water quality in your pond in the last one year?                                        | <input type="text"/>                                                 | Yes ..... 1<br>No..... 2 > <b>L2a_13</b>                                                                                                                                                                                                                     |
| <b>L2a_12a</b> | How did you monitor the water quality in your pond in the last one year?<br><br>[Multiple response allowed] | <input type="text"/><br><input type="text"/><br><input type="text"/> | Used hand to assess turbidity ..... 1<br>Used hand to assess turbidity..... 2<br>PH level tested ..... 3<br>Observed fish for piping behavior..... 4<br>Others (Specify) ..... 96                                                                            |

Household Number:

| <b>L2a_13</b>                  | Did you do anything to maintain good water quality in your pond in the last one year?                                          | <input type="text"/>                                                                                                                                                                                                                                                                                                                                                                                                                                                                                                                                                                                                                                                                                               | Yes .....1<br>No.....2> <b>L2a_14</b>                                                                                                                                                                                                                                                        |          |                   |                      |                   |                      |                      |                      |                                |                      |                     |                      |                         |
|--------------------------------|--------------------------------------------------------------------------------------------------------------------------------|--------------------------------------------------------------------------------------------------------------------------------------------------------------------------------------------------------------------------------------------------------------------------------------------------------------------------------------------------------------------------------------------------------------------------------------------------------------------------------------------------------------------------------------------------------------------------------------------------------------------------------------------------------------------------------------------------------------------|----------------------------------------------------------------------------------------------------------------------------------------------------------------------------------------------------------------------------------------------------------------------------------------------|----------|-------------------|----------------------|-------------------|----------------------|----------------------|----------------------|--------------------------------|----------------------|---------------------|----------------------|-------------------------|
| <b>L2a_13a</b>                 | What did you do to maintain good water quality in your pond in the last one year?<br><br>[Multiple response allowed]           | <input type="text"/><br><input type="text"/><br><input type="text"/><br><input type="text"/>                                                                                                                                                                                                                                                                                                                                                                                                                                                                                                                                                                                                                       | Screened the water coming into the pond ..... 1<br>Cut the grass around the pond ..... 2<br>Drained the pond to clean it ..... 3<br>Added ash to stabilize water PH ..... 4<br>Added dissolved oxygen ..... 5<br>Added lime ..... 6<br>Added fertilizer ..... 7<br>Others (Specify) ..... 96 |          |                   |                      |                   |                      |                      |                      |                                |                      |                     |                      |                         |
| <b>L2a_14</b>                  | In the last one year, how many times have you drained the water from your fish pond and allowed the bottom of the pond to dry? | <input type="text"/>                                                                                                                                                                                                                                                                                                                                                                                                                                                                                                                                                                                                                                                                                               | Number<br>None .....00                                                                                                                                                                                                                                                                       |          |                   |                      |                   |                      |                      |                      |                                |                      |                     |                      |                         |
| <b>L2a_15</b>                  | In the last one year, have you used any techniques to improve your production of fish?                                         | <input type="text"/>                                                                                                                                                                                                                                                                                                                                                                                                                                                                                                                                                                                                                                                                                               | Yes ..... 1<br>No.....2> <b>L2a_17</b>                                                                                                                                                                                                                                                       |          |                   |                      |                   |                      |                      |                      |                                |                      |                     |                      |                         |
| <b>L2a_16</b>                  | What kind of technique did you use in the last one year to improve your production of fish? Did you practice:                  | <table border="1" style="width: 100%; border-collapse: collapse;"> <thead> <tr> <th style="width: 50%;">Item</th> <th style="width: 50%;">Response</th> </tr> </thead> <tbody> <tr> <td>A) Sex separation</td> <td style="text-align: center;"><input type="text"/></td> </tr> <tr> <td>B) Age separation</td> <td style="text-align: center;"><input type="text"/></td> </tr> <tr> <td>C) Variation of feed</td> <td style="text-align: center;"><input type="text"/></td> </tr> <tr> <td>D) An improved stocking method</td> <td style="text-align: center;"><input type="text"/></td> </tr> <tr> <td>E) Others (Specify)</td> <td style="text-align: center;"><input type="text"/></td> </tr> </tbody> </table> | Item                                                                                                                                                                                                                                                                                         | Response | A) Sex separation | <input type="text"/> | B) Age separation | <input type="text"/> | C) Variation of feed | <input type="text"/> | D) An improved stocking method | <input type="text"/> | E) Others (Specify) | <input type="text"/> | Yes ..... 1<br>No.....2 |
| Item                           | Response                                                                                                                       |                                                                                                                                                                                                                                                                                                                                                                                                                                                                                                                                                                                                                                                                                                                    |                                                                                                                                                                                                                                                                                              |          |                   |                      |                   |                      |                      |                      |                                |                      |                     |                      |                         |
| A) Sex separation              | <input type="text"/>                                                                                                           |                                                                                                                                                                                                                                                                                                                                                                                                                                                                                                                                                                                                                                                                                                                    |                                                                                                                                                                                                                                                                                              |          |                   |                      |                   |                      |                      |                      |                                |                      |                     |                      |                         |
| B) Age separation              | <input type="text"/>                                                                                                           |                                                                                                                                                                                                                                                                                                                                                                                                                                                                                                                                                                                                                                                                                                                    |                                                                                                                                                                                                                                                                                              |          |                   |                      |                   |                      |                      |                      |                                |                      |                     |                      |                         |
| C) Variation of feed           | <input type="text"/>                                                                                                           |                                                                                                                                                                                                                                                                                                                                                                                                                                                                                                                                                                                                                                                                                                                    |                                                                                                                                                                                                                                                                                              |          |                   |                      |                   |                      |                      |                      |                                |                      |                     |                      |                         |
| D) An improved stocking method | <input type="text"/>                                                                                                           |                                                                                                                                                                                                                                                                                                                                                                                                                                                                                                                                                                                                                                                                                                                    |                                                                                                                                                                                                                                                                                              |          |                   |                      |                   |                      |                      |                      |                                |                      |                     |                      |                         |
| E) Others (Specify)            | <input type="text"/>                                                                                                           |                                                                                                                                                                                                                                                                                                                                                                                                                                                                                                                                                                                                                                                                                                                    |                                                                                                                                                                                                                                                                                              |          |                   |                      |                   |                      |                      |                      |                                |                      |                     |                      |                         |
| <b>L2a_17</b>                  | Did you add animal manure to your fish ponds in the last one year?                                                             | <input type="text"/>                                                                                                                                                                                                                                                                                                                                                                                                                                                                                                                                                                                                                                                                                               | Yes ..... 1<br>No.....2> <b>L2a_18a</b>                                                                                                                                                                                                                                                      |          |                   |                      |                   |                      |                      |                      |                                |                      |                     |                      |                         |

Household Number:

|                |                                                                                             |                      |                                                                                                                          |
|----------------|---------------------------------------------------------------------------------------------|----------------------|--------------------------------------------------------------------------------------------------------------------------|
| <b>L2a_17a</b> | Where do you usually get the manure you add to your fish ponds?                             | <input type="text"/> | Produced by own animals ..... 1<br>Given by friends/family/neighbor farm..... 2<br>Purchased from market/ trader ..... 3 |
| <b>L2a_18a</b> | Do you usually harvest all of your fish at one time, or do you usually do partial harvests? | <input type="text"/> | Harvest all fish at once ..... 1<br>Partial harvest..... 2                                                               |
| <b>L2a_18b</b> | What method do you usually use to harvest your fish?                                        | <input type="text"/> | Cast net ..... 1>>L2a_19a<br>Seine net..... 2>>L2a_19a<br>Pull cages up..... 3<br>Others (Specify) ..... 96>>L2a_19a     |
| <b>L2a_18c</b> | How many cages do you have?                                                                 | <input type="text"/> | Number of <u>cage</u><br>Don't know ..... 998                                                                            |
| <b>L2a_18d</b> | What is the height of your cages?                                                           | <input type="text"/> | Height of the <u>cage</u><br>Write it in meters<br>Don't know ..... 998                                                  |
| <b>L2a_18e</b> | What is the width of your cages?                                                            | <input type="text"/> | Width of the <u>cage</u><br>Write it in meters<br>Don't know ..... 998                                                   |
| <b>L2a_18f</b> | What is the depth of your cages?                                                            | <input type="text"/> | Depth of the <u>cage</u><br>Write it in meters<br>Don't know ..... 998                                                   |
| <b>L2a_19a</b> | How many fish have you harvested in the last one month?                                     | <input type="text"/> | Number of fish<br><br>Did not harvest ..... 0>>L2a_19c<br>Don't know ..... 9998                                          |
| <b>L2a_19b</b> | What was the total weight (in kg) of the fish you harvested in the last one month?          | <input type="text"/> | Weight of fish<br>Kilogram<br>Don't know ..... 9998                                                                      |
| <b>L2a_19c</b> | How many fish have you harvested in the last one year?                                      | <input type="text"/> | Number of fish<br>Did not harvest ..... 0>>L2a_20<br>Don't know ..... 9998                                               |

|                     |                                                                                                    |                                              |                      |                                                                                                                                   |
|---------------------|----------------------------------------------------------------------------------------------------|----------------------------------------------|----------------------|-----------------------------------------------------------------------------------------------------------------------------------|
| <b>L2a_19d</b>      | What was the total weight of the fish you harvested in the last one year?                          | <input type="text"/>                         |                      | Weight of fish<br>Kilogram<br>Don't know ..... 9998                                                                               |
| <b>L2a_20</b>       | Why did you produce fish?                                                                          | <input type="text"/>                         |                      | Raised for food only..... 1<br>Raised for market only ..... 2<br>Raised for both food and market ..... 3                          |
| <b>L2a_21</b>       | After you harvest the fish that you use to provide food for your household, do you usually:        | a) Leave the fish whole round                | <input type="text"/> | Yes ..... 1<br>No ..... 2                                                                                                         |
| b) Gut the fish     |                                                                                                    | <input type="text"/>                         |                      |                                                                                                                                   |
| c) Salt             |                                                                                                    | <input type="text"/>                         |                      |                                                                                                                                   |
| d) Smoke            |                                                                                                    | <input type="text"/>                         |                      |                                                                                                                                   |
| e) Dry              |                                                                                                    | <input type="text"/>                         |                      |                                                                                                                                   |
| f) Pickle the fish  |                                                                                                    | <input type="text"/>                         |                      |                                                                                                                                   |
| g) Others (Specify) |                                                                                                    | <input type="text"/>                         |                      |                                                                                                                                   |
| <b>L2a_23</b>       | After you harvest the fish that you sell or trade in the market, do you usually:                   | a) Leave the fish whole round                | <input type="text"/> | Yes ..... 1<br>No ..... 2                                                                                                         |
| b) Gut the fish     |                                                                                                    | <input type="text"/>                         |                      |                                                                                                                                   |
| c) Salt             |                                                                                                    | <input type="text"/>                         |                      |                                                                                                                                   |
| d) Smoke            |                                                                                                    | <input type="text"/>                         |                      |                                                                                                                                   |
| e) Dry              |                                                                                                    | <input type="text"/>                         |                      |                                                                                                                                   |
| f) Pickle the fish  |                                                                                                    | <input type="text"/>                         |                      |                                                                                                                                   |
| g) Others (Specify) |                                                                                                    | <input type="text"/>                         |                      |                                                                                                                                   |
| <b>L2a_23a</b>      | After you process your fish, what do you do with the fish guts?<br><br>[Multiple response allowed] | <input type="text"/><br><input type="text"/> |                      | Nothing/discard ..... 1<br>Use as compost ..... 2<br>Use as animal feed ..... 3<br>Others (Specify) ..... 96                      |
| <b>L2a_23b</b>      | After you process your fish, what do you do with the fish skins or scales?                         | <input type="text"/>                         |                      | Nothing/discard ..... 1<br>Use as compost ..... 2<br>Use as animal feed ..... 3<br>Sell them ..... 4<br>Others (Specify) ..... 96 |

Household Number:

|                |                                                                                                                                                                                                    |                      |                                                                                                                                                                                                                 |
|----------------|----------------------------------------------------------------------------------------------------------------------------------------------------------------------------------------------------|----------------------|-----------------------------------------------------------------------------------------------------------------------------------------------------------------------------------------------------------------|
| <b>L2a_24</b>  | Do you keep regular written records on your fish, for example how much feed the fish are given, what kind of feed the fish are given, the number of fish stocked, or the number of fish harvested? | <input type="text"/> | Yes ..... 1<br>No..... 2                                                                                                                                                                                        |
| <b>L2a_25</b>  | Have you ever been trained in aquaculture, either formally or informally?                                                                                                                          | <input type="text"/> | Yes, formally trained..... 1<br>Yes, informally trained ..... 2>>L2a_26<br>Yes, both formally and informally .....3<br>Not trained ..... 4>>L2a_26                                                              |
| <b>L2a_25a</b> | When was the last time you participated in a formal training on aquaculture?                                                                                                                       | <input type="text"/> | Within the past 1 year ..... 1<br>Within the past 2 year ..... 2<br>Within the past 3 year ..... 3<br>More than 3 years ago ..... 4                                                                             |
| <b>L2a_26</b>  | Do you have access to extension services for your fish?                                                                                                                                            | <input type="text"/> | Yes ..... 1<br>No..... 2                                                                                                                                                                                        |
| <b>L2a_27</b>  | What information source do you rely on the most to help you raise your fish well?                                                                                                                  | <input type="text"/> | Family/friend/neighbor ..... 1<br>AG Extension Worker..... 2<br>School ..... 3<br>Radio program ..... 4<br>Television..... 5<br>Mobile phone messaging ..... 6<br>Internet ..... 7<br>Others (Specify) ..... 96 |

Module End Time: 

|      |                      |                      |        |                      |                      |
|------|----------------------|----------------------|--------|----------------------|----------------------|
| Hour | <input type="text"/> | <input type="text"/> | Minute | <input type="text"/> | <input type="text"/> |
|------|----------------------|----------------------|--------|----------------------|----------------------|

Household Number:

**Module L2b: Pond area or diagram (The whole farm) (Male)**

MAP OUT/DRAW THE PONDS WHERE FISH ARE RAISED. INDICATE THE LOCALITY AND NUMBER EACH POND. THE PONDS IDENTIFIED IN THIS MODULE WILL BE USED WITH MODULE L2c

Module start time: Hour   Minu

Respondent ID:  Consent :  Yes ...1  
No.....2

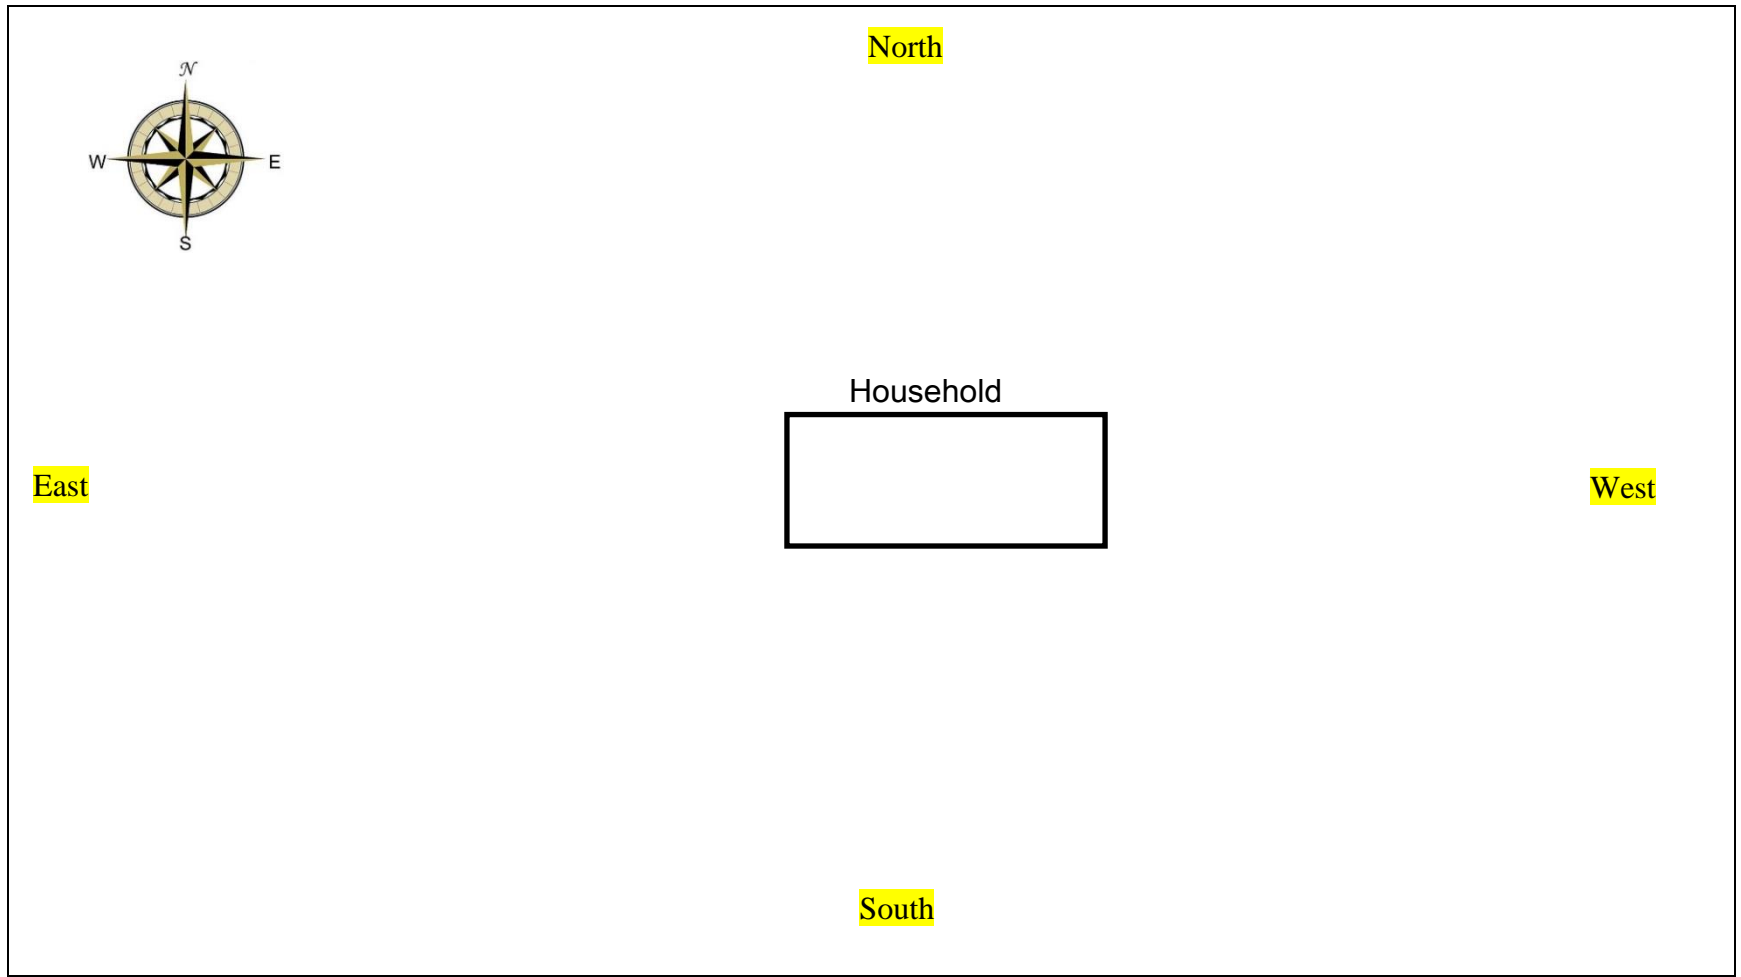

Module End Time: Hour   Minute



Household Number:

**Module L2c: Pond Area Measurement (Male)**

Module start time: Hour   Minu   Respondent ID:  Consent :  Yes...1  
No.....2

| Question number      | A                                                                                                                                                                                                                                                                                            | B                                                                                                                                                                                                                                                                                                                                                                                                                                                                                                                              | C                           | D      | E      |  |                      |                      |   |                      |        |  |       |  |                      |                      |   |                      |                                                                                                                                                                                                                                                                                                                                                                                                                                                                                                                                |        |  |       |  |                      |                      |   |                      |        |  |       |  |                      |                      |   |                      |                                                                                                                                                                                                                                                                                                                                                                                                                                                                                                                                |        |  |       |  |                      |                      |   |                      |        |  |       |  |                      |                      |   |                      |                                                                                                                                                                                                                                                                                                                                                                                                                                                                                                                                |        |  |       |  |                      |                      |   |                      |        |  |       |  |                      |                      |   |                      |
|----------------------|----------------------------------------------------------------------------------------------------------------------------------------------------------------------------------------------------------------------------------------------------------------------------------------------|--------------------------------------------------------------------------------------------------------------------------------------------------------------------------------------------------------------------------------------------------------------------------------------------------------------------------------------------------------------------------------------------------------------------------------------------------------------------------------------------------------------------------------|-----------------------------|--------|--------|--|----------------------|----------------------|---|----------------------|--------|--|-------|--|----------------------|----------------------|---|----------------------|--------------------------------------------------------------------------------------------------------------------------------------------------------------------------------------------------------------------------------------------------------------------------------------------------------------------------------------------------------------------------------------------------------------------------------------------------------------------------------------------------------------------------------|--------|--|-------|--|----------------------|----------------------|---|----------------------|--------|--|-------|--|----------------------|----------------------|---|----------------------|--------------------------------------------------------------------------------------------------------------------------------------------------------------------------------------------------------------------------------------------------------------------------------------------------------------------------------------------------------------------------------------------------------------------------------------------------------------------------------------------------------------------------------|--------|--|-------|--|----------------------|----------------------|---|----------------------|--------|--|-------|--|----------------------|----------------------|---|----------------------|--------------------------------------------------------------------------------------------------------------------------------------------------------------------------------------------------------------------------------------------------------------------------------------------------------------------------------------------------------------------------------------------------------------------------------------------------------------------------------------------------------------------------------|--------|--|-------|--|----------------------|----------------------|---|----------------------|--------|--|-------|--|----------------------|----------------------|---|----------------------|
| L2c_01               | Write the plot ID of the pond from module G                                                                                                                                                                                                                                                  | Pond 1 <input type="text"/>                                                                                                                                                                                                                                                                                                                                                                                                                                                                                                    | Pond 2 <input type="text"/> | Pond 3 | Pond 4 |  |                      |                      |   |                      |        |  |       |  |                      |                      |   |                      |                                                                                                                                                                                                                                                                                                                                                                                                                                                                                                                                |        |  |       |  |                      |                      |   |                      |        |  |       |  |                      |                      |   |                      |                                                                                                                                                                                                                                                                                                                                                                                                                                                                                                                                |        |  |       |  |                      |                      |   |                      |        |  |       |  |                      |                      |   |                      |                                                                                                                                                                                                                                                                                                                                                                                                                                                                                                                                |        |  |       |  |                      |                      |   |                      |        |  |       |  |                      |                      |   |                      |
| L2c_02               | 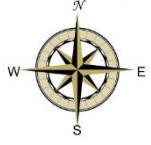<br><br>Draw the pond diagram<br>=>>                                                                                                                                                                        | Pond 1                                                                                                                                                                                                                                                                                                                                                                                                                                                                                                                         | Pond 2                      | Pond 3 | Pond 4 |  |                      |                      |   |                      |        |  |       |  |                      |                      |   |                      |                                                                                                                                                                                                                                                                                                                                                                                                                                                                                                                                |        |  |       |  |                      |                      |   |                      |        |  |       |  |                      |                      |   |                      |                                                                                                                                                                                                                                                                                                                                                                                                                                                                                                                                |        |  |       |  |                      |                      |   |                      |        |  |       |  |                      |                      |   |                      |                                                                                                                                                                                                                                                                                                                                                                                                                                                                                                                                |        |  |       |  |                      |                      |   |                      |        |  |       |  |                      |                      |   |                      |
| <b>Note</b> L2c_03:  | Walk the perimeter of the pond, write down the number of steps walked in length and width and record that in the first row of Number of steps. Then multiply the number of steps by 1.5 to convert it to meter.<br>(Length X 1.5, Width X 1.5), Finally write it in the row mentioned meter. | Number of steps<br><table border="1"> <thead> <tr> <th colspan="2">Length</th> <th colspan="2">Width</th> </tr> </thead> <tbody> <tr> <td><input type="text"/></td> <td><input type="text"/></td> <td>X</td> <td><input type="text"/></td> </tr> </tbody> </table><br>Meter<br><table border="1"> <thead> <tr> <th colspan="2">Length</th> <th colspan="2">Width</th> </tr> </thead> <tbody> <tr> <td><input type="text"/></td> <td><input type="text"/></td> <td>X</td> <td><input type="text"/></td> </tr> </tbody> </table> | Length                      |        | Width  |  | <input type="text"/> | <input type="text"/> | X | <input type="text"/> | Length |  | Width |  | <input type="text"/> | <input type="text"/> | X | <input type="text"/> | Number of steps<br><table border="1"> <thead> <tr> <th colspan="2">Length</th> <th colspan="2">Width</th> </tr> </thead> <tbody> <tr> <td><input type="text"/></td> <td><input type="text"/></td> <td>X</td> <td><input type="text"/></td> </tr> </tbody> </table><br>Meter<br><table border="1"> <thead> <tr> <th colspan="2">Length</th> <th colspan="2">Width</th> </tr> </thead> <tbody> <tr> <td><input type="text"/></td> <td><input type="text"/></td> <td>X</td> <td><input type="text"/></td> </tr> </tbody> </table> | Length |  | Width |  | <input type="text"/> | <input type="text"/> | X | <input type="text"/> | Length |  | Width |  | <input type="text"/> | <input type="text"/> | X | <input type="text"/> | Number of steps<br><table border="1"> <thead> <tr> <th colspan="2">Length</th> <th colspan="2">Width</th> </tr> </thead> <tbody> <tr> <td><input type="text"/></td> <td><input type="text"/></td> <td>X</td> <td><input type="text"/></td> </tr> </tbody> </table><br>Meter<br><table border="1"> <thead> <tr> <th colspan="2">Length</th> <th colspan="2">Width</th> </tr> </thead> <tbody> <tr> <td><input type="text"/></td> <td><input type="text"/></td> <td>X</td> <td><input type="text"/></td> </tr> </tbody> </table> | Length |  | Width |  | <input type="text"/> | <input type="text"/> | X | <input type="text"/> | Length |  | Width |  | <input type="text"/> | <input type="text"/> | X | <input type="text"/> | Number of steps<br><table border="1"> <thead> <tr> <th colspan="2">Length</th> <th colspan="2">Width</th> </tr> </thead> <tbody> <tr> <td><input type="text"/></td> <td><input type="text"/></td> <td>X</td> <td><input type="text"/></td> </tr> </tbody> </table><br>Meter<br><table border="1"> <thead> <tr> <th colspan="2">Length</th> <th colspan="2">Width</th> </tr> </thead> <tbody> <tr> <td><input type="text"/></td> <td><input type="text"/></td> <td>X</td> <td><input type="text"/></td> </tr> </tbody> </table> | Length |  | Width |  | <input type="text"/> | <input type="text"/> | X | <input type="text"/> | Length |  | Width |  | <input type="text"/> | <input type="text"/> | X | <input type="text"/> |
| Length               |                                                                                                                                                                                                                                                                                              | Width                                                                                                                                                                                                                                                                                                                                                                                                                                                                                                                          |                             |        |        |  |                      |                      |   |                      |        |  |       |  |                      |                      |   |                      |                                                                                                                                                                                                                                                                                                                                                                                                                                                                                                                                |        |  |       |  |                      |                      |   |                      |        |  |       |  |                      |                      |   |                      |                                                                                                                                                                                                                                                                                                                                                                                                                                                                                                                                |        |  |       |  |                      |                      |   |                      |        |  |       |  |                      |                      |   |                      |                                                                                                                                                                                                                                                                                                                                                                                                                                                                                                                                |        |  |       |  |                      |                      |   |                      |        |  |       |  |                      |                      |   |                      |
| <input type="text"/> | <input type="text"/>                                                                                                                                                                                                                                                                         | X                                                                                                                                                                                                                                                                                                                                                                                                                                                                                                                              | <input type="text"/>        |        |        |  |                      |                      |   |                      |        |  |       |  |                      |                      |   |                      |                                                                                                                                                                                                                                                                                                                                                                                                                                                                                                                                |        |  |       |  |                      |                      |   |                      |        |  |       |  |                      |                      |   |                      |                                                                                                                                                                                                                                                                                                                                                                                                                                                                                                                                |        |  |       |  |                      |                      |   |                      |        |  |       |  |                      |                      |   |                      |                                                                                                                                                                                                                                                                                                                                                                                                                                                                                                                                |        |  |       |  |                      |                      |   |                      |        |  |       |  |                      |                      |   |                      |
| Length               |                                                                                                                                                                                                                                                                                              | Width                                                                                                                                                                                                                                                                                                                                                                                                                                                                                                                          |                             |        |        |  |                      |                      |   |                      |        |  |       |  |                      |                      |   |                      |                                                                                                                                                                                                                                                                                                                                                                                                                                                                                                                                |        |  |       |  |                      |                      |   |                      |        |  |       |  |                      |                      |   |                      |                                                                                                                                                                                                                                                                                                                                                                                                                                                                                                                                |        |  |       |  |                      |                      |   |                      |        |  |       |  |                      |                      |   |                      |                                                                                                                                                                                                                                                                                                                                                                                                                                                                                                                                |        |  |       |  |                      |                      |   |                      |        |  |       |  |                      |                      |   |                      |
| <input type="text"/> | <input type="text"/>                                                                                                                                                                                                                                                                         | X                                                                                                                                                                                                                                                                                                                                                                                                                                                                                                                              | <input type="text"/>        |        |        |  |                      |                      |   |                      |        |  |       |  |                      |                      |   |                      |                                                                                                                                                                                                                                                                                                                                                                                                                                                                                                                                |        |  |       |  |                      |                      |   |                      |        |  |       |  |                      |                      |   |                      |                                                                                                                                                                                                                                                                                                                                                                                                                                                                                                                                |        |  |       |  |                      |                      |   |                      |        |  |       |  |                      |                      |   |                      |                                                                                                                                                                                                                                                                                                                                                                                                                                                                                                                                |        |  |       |  |                      |                      |   |                      |        |  |       |  |                      |                      |   |                      |
| Length               |                                                                                                                                                                                                                                                                                              | Width                                                                                                                                                                                                                                                                                                                                                                                                                                                                                                                          |                             |        |        |  |                      |                      |   |                      |        |  |       |  |                      |                      |   |                      |                                                                                                                                                                                                                                                                                                                                                                                                                                                                                                                                |        |  |       |  |                      |                      |   |                      |        |  |       |  |                      |                      |   |                      |                                                                                                                                                                                                                                                                                                                                                                                                                                                                                                                                |        |  |       |  |                      |                      |   |                      |        |  |       |  |                      |                      |   |                      |                                                                                                                                                                                                                                                                                                                                                                                                                                                                                                                                |        |  |       |  |                      |                      |   |                      |        |  |       |  |                      |                      |   |                      |
| <input type="text"/> | <input type="text"/>                                                                                                                                                                                                                                                                         | X                                                                                                                                                                                                                                                                                                                                                                                                                                                                                                                              | <input type="text"/>        |        |        |  |                      |                      |   |                      |        |  |       |  |                      |                      |   |                      |                                                                                                                                                                                                                                                                                                                                                                                                                                                                                                                                |        |  |       |  |                      |                      |   |                      |        |  |       |  |                      |                      |   |                      |                                                                                                                                                                                                                                                                                                                                                                                                                                                                                                                                |        |  |       |  |                      |                      |   |                      |        |  |       |  |                      |                      |   |                      |                                                                                                                                                                                                                                                                                                                                                                                                                                                                                                                                |        |  |       |  |                      |                      |   |                      |        |  |       |  |                      |                      |   |                      |
| Length               |                                                                                                                                                                                                                                                                                              | Width                                                                                                                                                                                                                                                                                                                                                                                                                                                                                                                          |                             |        |        |  |                      |                      |   |                      |        |  |       |  |                      |                      |   |                      |                                                                                                                                                                                                                                                                                                                                                                                                                                                                                                                                |        |  |       |  |                      |                      |   |                      |        |  |       |  |                      |                      |   |                      |                                                                                                                                                                                                                                                                                                                                                                                                                                                                                                                                |        |  |       |  |                      |                      |   |                      |        |  |       |  |                      |                      |   |                      |                                                                                                                                                                                                                                                                                                                                                                                                                                                                                                                                |        |  |       |  |                      |                      |   |                      |        |  |       |  |                      |                      |   |                      |
| <input type="text"/> | <input type="text"/>                                                                                                                                                                                                                                                                         | X                                                                                                                                                                                                                                                                                                                                                                                                                                                                                                                              | <input type="text"/>        |        |        |  |                      |                      |   |                      |        |  |       |  |                      |                      |   |                      |                                                                                                                                                                                                                                                                                                                                                                                                                                                                                                                                |        |  |       |  |                      |                      |   |                      |        |  |       |  |                      |                      |   |                      |                                                                                                                                                                                                                                                                                                                                                                                                                                                                                                                                |        |  |       |  |                      |                      |   |                      |        |  |       |  |                      |                      |   |                      |                                                                                                                                                                                                                                                                                                                                                                                                                                                                                                                                |        |  |       |  |                      |                      |   |                      |        |  |       |  |                      |                      |   |                      |
| Length               |                                                                                                                                                                                                                                                                                              | Width                                                                                                                                                                                                                                                                                                                                                                                                                                                                                                                          |                             |        |        |  |                      |                      |   |                      |        |  |       |  |                      |                      |   |                      |                                                                                                                                                                                                                                                                                                                                                                                                                                                                                                                                |        |  |       |  |                      |                      |   |                      |        |  |       |  |                      |                      |   |                      |                                                                                                                                                                                                                                                                                                                                                                                                                                                                                                                                |        |  |       |  |                      |                      |   |                      |        |  |       |  |                      |                      |   |                      |                                                                                                                                                                                                                                                                                                                                                                                                                                                                                                                                |        |  |       |  |                      |                      |   |                      |        |  |       |  |                      |                      |   |                      |
| <input type="text"/> | <input type="text"/>                                                                                                                                                                                                                                                                         | X                                                                                                                                                                                                                                                                                                                                                                                                                                                                                                                              | <input type="text"/>        |        |        |  |                      |                      |   |                      |        |  |       |  |                      |                      |   |                      |                                                                                                                                                                                                                                                                                                                                                                                                                                                                                                                                |        |  |       |  |                      |                      |   |                      |        |  |       |  |                      |                      |   |                      |                                                                                                                                                                                                                                                                                                                                                                                                                                                                                                                                |        |  |       |  |                      |                      |   |                      |        |  |       |  |                      |                      |   |                      |                                                                                                                                                                                                                                                                                                                                                                                                                                                                                                                                |        |  |       |  |                      |                      |   |                      |        |  |       |  |                      |                      |   |                      |
| Length               |                                                                                                                                                                                                                                                                                              | Width                                                                                                                                                                                                                                                                                                                                                                                                                                                                                                                          |                             |        |        |  |                      |                      |   |                      |        |  |       |  |                      |                      |   |                      |                                                                                                                                                                                                                                                                                                                                                                                                                                                                                                                                |        |  |       |  |                      |                      |   |                      |        |  |       |  |                      |                      |   |                      |                                                                                                                                                                                                                                                                                                                                                                                                                                                                                                                                |        |  |       |  |                      |                      |   |                      |        |  |       |  |                      |                      |   |                      |                                                                                                                                                                                                                                                                                                                                                                                                                                                                                                                                |        |  |       |  |                      |                      |   |                      |        |  |       |  |                      |                      |   |                      |
| <input type="text"/> | <input type="text"/>                                                                                                                                                                                                                                                                         | X                                                                                                                                                                                                                                                                                                                                                                                                                                                                                                                              | <input type="text"/>        |        |        |  |                      |                      |   |                      |        |  |       |  |                      |                      |   |                      |                                                                                                                                                                                                                                                                                                                                                                                                                                                                                                                                |        |  |       |  |                      |                      |   |                      |        |  |       |  |                      |                      |   |                      |                                                                                                                                                                                                                                                                                                                                                                                                                                                                                                                                |        |  |       |  |                      |                      |   |                      |        |  |       |  |                      |                      |   |                      |                                                                                                                                                                                                                                                                                                                                                                                                                                                                                                                                |        |  |       |  |                      |                      |   |                      |        |  |       |  |                      |                      |   |                      |
| Length               |                                                                                                                                                                                                                                                                                              | Width                                                                                                                                                                                                                                                                                                                                                                                                                                                                                                                          |                             |        |        |  |                      |                      |   |                      |        |  |       |  |                      |                      |   |                      |                                                                                                                                                                                                                                                                                                                                                                                                                                                                                                                                |        |  |       |  |                      |                      |   |                      |        |  |       |  |                      |                      |   |                      |                                                                                                                                                                                                                                                                                                                                                                                                                                                                                                                                |        |  |       |  |                      |                      |   |                      |        |  |       |  |                      |                      |   |                      |                                                                                                                                                                                                                                                                                                                                                                                                                                                                                                                                |        |  |       |  |                      |                      |   |                      |        |  |       |  |                      |                      |   |                      |
| <input type="text"/> | <input type="text"/>                                                                                                                                                                                                                                                                         | X                                                                                                                                                                                                                                                                                                                                                                                                                                                                                                                              | <input type="text"/>        |        |        |  |                      |                      |   |                      |        |  |       |  |                      |                      |   |                      |                                                                                                                                                                                                                                                                                                                                                                                                                                                                                                                                |        |  |       |  |                      |                      |   |                      |        |  |       |  |                      |                      |   |                      |                                                                                                                                                                                                                                                                                                                                                                                                                                                                                                                                |        |  |       |  |                      |                      |   |                      |        |  |       |  |                      |                      |   |                      |                                                                                                                                                                                                                                                                                                                                                                                                                                                                                                                                |        |  |       |  |                      |                      |   |                      |        |  |       |  |                      |                      |   |                      |
| Length               |                                                                                                                                                                                                                                                                                              | Width                                                                                                                                                                                                                                                                                                                                                                                                                                                                                                                          |                             |        |        |  |                      |                      |   |                      |        |  |       |  |                      |                      |   |                      |                                                                                                                                                                                                                                                                                                                                                                                                                                                                                                                                |        |  |       |  |                      |                      |   |                      |        |  |       |  |                      |                      |   |                      |                                                                                                                                                                                                                                                                                                                                                                                                                                                                                                                                |        |  |       |  |                      |                      |   |                      |        |  |       |  |                      |                      |   |                      |                                                                                                                                                                                                                                                                                                                                                                                                                                                                                                                                |        |  |       |  |                      |                      |   |                      |        |  |       |  |                      |                      |   |                      |
| <input type="text"/> | <input type="text"/>                                                                                                                                                                                                                                                                         | X                                                                                                                                                                                                                                                                                                                                                                                                                                                                                                                              | <input type="text"/>        |        |        |  |                      |                      |   |                      |        |  |       |  |                      |                      |   |                      |                                                                                                                                                                                                                                                                                                                                                                                                                                                                                                                                |        |  |       |  |                      |                      |   |                      |        |  |       |  |                      |                      |   |                      |                                                                                                                                                                                                                                                                                                                                                                                                                                                                                                                                |        |  |       |  |                      |                      |   |                      |        |  |       |  |                      |                      |   |                      |                                                                                                                                                                                                                                                                                                                                                                                                                                                                                                                                |        |  |       |  |                      |                      |   |                      |        |  |       |  |                      |                      |   |                      |

Household Number:

|                                                                       |                                                                    |                                                                                                                                                                                                                                           |                                                                                                                                                                                                                                           |                                                                                                                                                                                                                                           |                                                                                                                                                                                                                                           |
|-----------------------------------------------------------------------|--------------------------------------------------------------------|-------------------------------------------------------------------------------------------------------------------------------------------------------------------------------------------------------------------------------------------|-------------------------------------------------------------------------------------------------------------------------------------------------------------------------------------------------------------------------------------------|-------------------------------------------------------------------------------------------------------------------------------------------------------------------------------------------------------------------------------------------|-------------------------------------------------------------------------------------------------------------------------------------------------------------------------------------------------------------------------------------------|
| Now multiply the length and width and record the below for each pond: |                                                                    |                                                                                                                                                                                                                                           |                                                                                                                                                                                                                                           |                                                                                                                                                                                                                                           |                                                                                                                                                                                                                                           |
| L2c_03                                                                | Walk the perimeter of the pond and enter the area in square meters | <input type="text"/> <input type="text"/> <input type="text"/> <input type="text"/> <input type="text"/> <input type="text"/> <input type="text"/><br>(Square meter)<br>Not present ..... 9994<br>Refused ..... 9995<br>Others ..... 9996 | <input type="text"/> <input type="text"/> <input type="text"/> <input type="text"/> <input type="text"/> <input type="text"/> <input type="text"/><br>(Square meter)<br>Not present ..... 9994<br>Refused ..... 9995<br>Others ..... 9996 | <input type="text"/> <input type="text"/> <input type="text"/> <input type="text"/> <input type="text"/> <input type="text"/> <input type="text"/><br>(Square meter)<br>Not present ..... 9994<br>Refused ..... 9995<br>Others ..... 9996 | <input type="text"/> <input type="text"/> <input type="text"/> <input type="text"/> <input type="text"/> <input type="text"/> <input type="text"/><br>(Square meter)<br>Not present ..... 9994<br>Refused ..... 9995<br>Others ..... 9996 |
|                                                                       | Length X Width                                                     |                                                                                                                                                                                                                                           |                                                                                                                                                                                                                                           |                                                                                                                                                                                                                                           |                                                                                                                                                                                                                                           |
| L2c_04                                                                | End time of the module                                             | <input type="text"/> <input type="text"/><br>Hour<br><input type="text"/> <input type="text"/><br>Minute                                                                                                                                  | <input type="text"/> <input type="text"/><br>Hour<br><input type="text"/> <input type="text"/><br>Minute                                                                                                                                  | <input type="text"/> <input type="text"/><br>Hour<br><input type="text"/> <input type="text"/><br>Minute                                                                                                                                  | <input type="text"/> <input type="text"/><br>Hour<br><input type="text"/> <input type="text"/><br>Minute                                                                                                                                  |

Module End Time:  Hour   Minute





Household Number:

**Code list for Module M:**

| Code 1                       | Customer code 2                         | Payment code 4                          | Transportation code 6            |
|------------------------------|-----------------------------------------|-----------------------------------------|----------------------------------|
| Paddy/ rice ..... 1          | Village collector ..... 1               | Cash..... 1                             | Porter/ Self carrying ..... 1    |
| Rice..... 2                  | Wholesaler ..... 2                      | Ingredients..... 2                      | Rickshaw ..... 2                 |
| Wheat (a food crop) ..... 3  | Cold storage owner ..... 3              | Part cash & part goods .... 3           | Van ..... 3                      |
| Potato ..... 4               | Cold storage wholesale ..... 4          | Cheque ..... 4                          | Push van ..... 4                 |
| Dal ..... 5                  | Collection center<br>of company ..... 5 | Others (please specify) .... 5          | Tractor..... 5                   |
| Duck/Chicken ..... 6         | Processing farm ..... 6                 | <b>Farmer's sale center code 5</b>      | Truck..... 6                     |
| Cow/Buffalo/Milk cow ..... 7 | Co-operative society ..... 7            |                                         | Motorcar..... 7                  |
| Goat/ Lamb ..... 8           | Farmer society ..... 8                  | Farmer's field /<br>own village ..... 1 | Bicycle ..... 8                  |
| Goat/Lamb ..... 9            | Retailer ..... 9                        | Local retail market ..... 2             | Motor bicycle ..... 9            |
| Fish ..... 10                | Consumer..... 10                        | District wholesale market. 3            | Horse cart..... 10               |
| Shrimp ..... 11              | Hotel/ restaurant ..... 11              | Other district                          | Bullock cart ..... 11            |
| Banana ..... 12              | Others (please specify) ..... 12        | Wholesale market..... 4                 | Others (please specify) ..... 12 |
| Papaya..... 13               | <b>Customer's choice code 3</b>         | Dhaka wholesale market .. 5             | From own home..... 13            |
| Jack fruit ..... 14          |                                         | Pays high/good price ..... 1            | Other wholesale market.... 6     |
| Mango..... 15                | Buys a bulk ..... 2                     | Cold storage ..... 7                    |                                  |
| Guava..... 16                | Buys limited quantity..... 3            | Wholesale                               |                                  |
| Eggplant..... 17             | Makes advance                           | collection center ..... 8               |                                  |
| Tomato..... 18               | Payment ..... 4                         | Others (please specify) ..... 9         |                                  |
| Gourd..... 19                | Makes immediate                         |                                         |                                  |
| Palang shak ..... 20         | Payment ..... 5                         |                                         |                                  |
| Lal shak ..... 21            | Lives nearby ..... 6                    |                                         |                                  |
| Pui shak ..... 22            | No other option..... 7                  |                                         |                                  |
| Jute..... 23                 |                                         |                                         |                                  |
| Shorisha ..... 24            |                                         |                                         |                                  |
| Onion ..... 25               |                                         |                                         |                                  |
| Garlic ..... 26              |                                         |                                         |                                  |
| Others (specify) ..... 27    |                                         |                                         |                                  |

Module End Time:

|      |                      |                      |        |                      |                      |
|------|----------------------|----------------------|--------|----------------------|----------------------|
| Hour | <input type="text"/> | <input type="text"/> | Minute | <input type="text"/> | <input type="text"/> |
|------|----------------------|----------------------|--------|----------------------|----------------------|

Household Number:

**Module N: Non-agricultural Enterprises (Male)**

Module Start Time: Hour   Minute

Respondant ID:  Respondant's Consent:  Yes .....1  
No .....2

Ask member who is most knowledgeable about household's economic activities

| Question Number | MID                      | Question                                                                                                         | Response                 | Response Code                           |
|-----------------|--------------------------|------------------------------------------------------------------------------------------------------------------|--------------------------|-----------------------------------------|
| N01             | <input type="checkbox"/> | Has anyone in your household owned or operated any non-farm economic activity or business in the last 12 months? | <input type="checkbox"/> | Yes ..... 1<br>No ..... 2 >> End module |

| Enterprise | What type of business is/was this? |             | Who in the household made the decision to start the business?<br><br>If household member write member ID. If not, use code 2. |            |            | Who in the household would you consider the owners of the business?<br><br>If household member write member ID. If not, use code 2. |            |            | What was your profit in the last 12 months (excluding expenditure)? | For how long has this enterprise been operating? | Is the business still in operation?<br>1 = Yes (>N10a) | Who in the household made the decision to sell/end the business activities?<br><br>If household member write member ID. If not, use code 2. | Who in the household had control over any money from the sale or closure of the business?<br><br>If household member write member ID. If not, use code 2. |            |            | Who in the household is/was the principal manager/administrator or of the business (responsible for day to day operations)?<br><br>If household member write member ID. If not, use code 2. |            |            | Who in the household work/worked in the business?<br><br>If household member write member ID. If not, use code 2. |            |            |            |            |      |
|------------|------------------------------------|-------------|-------------------------------------------------------------------------------------------------------------------------------|------------|------------|-------------------------------------------------------------------------------------------------------------------------------------|------------|------------|---------------------------------------------------------------------|--------------------------------------------------|--------------------------------------------------------|---------------------------------------------------------------------------------------------------------------------------------------------|-----------------------------------------------------------------------------------------------------------------------------------------------------------|------------|------------|---------------------------------------------------------------------------------------------------------------------------------------------------------------------------------------------|------------|------------|-------------------------------------------------------------------------------------------------------------------|------------|------------|------------|------------|------|
|            | No                                 | Description | Business Code 1                                                                                                               | Mid/code 2 | Mid/code 2 | Mid/code 2                                                                                                                          | Mid/code 2 | Mid/code 2 | Mid/code 2                                                          | Tk                                               | Yr                                                     | Month                                                                                                                                       |                                                                                                                                                           | Mid/code 2 | Mid/code 2 | Mid/code 2                                                                                                                                                                                  | Mid/code 2 | Mid/code 2 | Mid/code 2                                                                                                        | Mid/code 2 | Mid/code 2 | Mid/code 2 | Mid/code 2 |      |
| BID        |                                    | N02         | N03a                                                                                                                          | N03b       | N03c       | N04a                                                                                                                                | N04b       | N04c       | N05                                                                 | N06a                                             | N06b                                                   | N07                                                                                                                                         | N08a                                                                                                                                                      | N08b       | N08c       | N09a                                                                                                                                                                                        | N09b       | N09c       | N10a                                                                                                              | N10b       | N10c       | N11a       | N11b       | N11c |
| i          |                                    |             |                                                                                                                               |            |            |                                                                                                                                     |            |            |                                                                     |                                                  |                                                        |                                                                                                                                             |                                                                                                                                                           |            |            |                                                                                                                                                                                             |            |            |                                                                                                                   |            |            |            |            |      |
| ii         |                                    |             |                                                                                                                               |            |            |                                                                                                                                     |            |            |                                                                     |                                                  |                                                        |                                                                                                                                             |                                                                                                                                                           |            |            |                                                                                                                                                                                             |            |            |                                                                                                                   |            |            |            |            |      |
| iii        |                                    |             |                                                                                                                               |            |            |                                                                                                                                     |            |            |                                                                     |                                                  |                                                        |                                                                                                                                             |                                                                                                                                                           |            |            |                                                                                                                                                                                             |            |            |                                                                                                                   |            |            |            |            |      |
| iv         |                                    |             |                                                                                                                               |            |            |                                                                                                                                     |            |            |                                                                     |                                                  |                                                        |                                                                                                                                             |                                                                                                                                                           |            |            |                                                                                                                                                                                             |            |            |                                                                                                                   |            |            |            |            |      |
| v          |                                    |             |                                                                                                                               |            |            |                                                                                                                                     |            |            |                                                                     |                                                  |                                                        |                                                                                                                                             |                                                                                                                                                           |            |            |                                                                                                                                                                                             |            |            |                                                                                                                   |            |            |            |            |      |

Household Number:

**Module N: Non-agricultural Enterprises (continued....) (Male)**

| Enterprise | What type of business is/was this? | Who in the household controls/controlled the money earned from the business?<br><br>If household member write member ID. If not, use code 2. |            |            | Where do you operate the enterprise?<br><br>Home...1<br>Fixed location outside home...2<br>No fixed place....3 | How many months did the enterprise operate in the past 12 months? | What is your share of equity in this enterprise? | What share of profit is kept by your HH? | Who are your main customers? |        | Where do you sell?<br>From farm/home1...1<br>Village market (within own village).....2<br>Village market (outside own village).....3<br>Town market..4<br>Others (please specify) .....5 | Is the enterprise registered with the govt. or local govt.?<br><br>Yes.....1<br>No.....2<br>N/A.....3 | What was your main source of finance for setting up the business?<br><br>(write down the 2 most important)<br><br>(Code-3) |        | How many people did you employ over the past 12 months? | What problems if any have you had in running your business?<br><br>(write down the 2 most important) |      |
|------------|------------------------------------|----------------------------------------------------------------------------------------------------------------------------------------------|------------|------------|----------------------------------------------------------------------------------------------------------------|-------------------------------------------------------------------|--------------------------------------------------|------------------------------------------|------------------------------|--------|------------------------------------------------------------------------------------------------------------------------------------------------------------------------------------------|-------------------------------------------------------------------------------------------------------|----------------------------------------------------------------------------------------------------------------------------|--------|---------------------------------------------------------|------------------------------------------------------------------------------------------------------|------|
|            |                                    | 1st                                                                                                                                          | 2nd        | Code 3     |                                                                                                                |                                                                   |                                                  |                                          | Code 3                       | Number |                                                                                                                                                                                          |                                                                                                       | Code 4                                                                                                                     | Code 4 |                                                         |                                                                                                      |      |
|            | Business Code 1                    | Mid/code 2                                                                                                                                   | Mid/code 2 | Mid/code 2 | N13                                                                                                            | N14                                                               | N15                                              | N16                                      | N17a                         | N17b   | N18                                                                                                                                                                                      | N19                                                                                                   | N20a                                                                                                                       | N20b   | N21                                                     | N22a                                                                                                 | N22b |
| BID        | N02                                | N12a                                                                                                                                         | N12b       | N12c       | N13                                                                                                            | N14                                                               | N15                                              | N16                                      | N17a                         | N17b   | N18                                                                                                                                                                                      | N19                                                                                                   | N20a                                                                                                                       | N20b   | N21                                                     | N22a                                                                                                 | N22b |
| i          |                                    |                                                                                                                                              |            |            |                                                                                                                |                                                                   |                                                  |                                          |                              |        |                                                                                                                                                                                          |                                                                                                       |                                                                                                                            |        |                                                         |                                                                                                      |      |
| ii         |                                    |                                                                                                                                              |            |            |                                                                                                                |                                                                   |                                                  |                                          |                              |        |                                                                                                                                                                                          |                                                                                                       |                                                                                                                            |        |                                                         |                                                                                                      |      |
| iii        |                                    |                                                                                                                                              |            |            |                                                                                                                |                                                                   |                                                  |                                          |                              |        |                                                                                                                                                                                          |                                                                                                       |                                                                                                                            |        |                                                         |                                                                                                      |      |
| iv         |                                    |                                                                                                                                              |            |            |                                                                                                                |                                                                   |                                                  |                                          |                              |        |                                                                                                                                                                                          |                                                                                                       |                                                                                                                            |        |                                                         |                                                                                                      |      |
| v          |                                    |                                                                                                                                              |            |            |                                                                                                                |                                                                   |                                                  |                                          |                              |        |                                                                                                                                                                                          |                                                                                                       |                                                                                                                            |        |                                                         |                                                                                                      |      |
| vi         |                                    |                                                                                                                                              |            |            |                                                                                                                |                                                                   |                                                  |                                          |                              |        |                                                                                                                                                                                          |                                                                                                       |                                                                                                                            |        |                                                         |                                                                                                      |      |

Household Number:

**Code list for module N:**

| Business Code 1                                                                                             | Ownership/Decision-making Code 2       | Source of finance Code 3                | Business Problems code 4                                                 |
|-------------------------------------------------------------------------------------------------------------|----------------------------------------|-----------------------------------------|--------------------------------------------------------------------------|
| Nursery ..... 1                                                                                             | All members jointly ..... 71           | Inherited/ through gift ..... 1         | No major problem ..... 1                                                 |
| Fishing ..... 2                                                                                             | Male outside household ..... 72        | Own savings ..... 2                     | Inadequate capital or credit ..... 2                                     |
| Mining and quarrying ..... 3                                                                                | Female outside household ..... 73      | Borrowing from relatives/ friends ... 3 | Inadequate tech. knowledge ..... 3                                       |
| Manufacturing ..... 4                                                                                       | Govt / Khas land/other institutions 74 | Agricultural Dev. Bank ..... 4          | Lack of required expertise ..... 4                                       |
| Electricity, gas and water supply ..... 5                                                                   | Not applicable ..... 98                | Commercial bank ..... 5                 | High-cost of running rent. .... 5                                        |
| Construction ..... 6                                                                                        |                                        | Grameen bank ..... 6                    | Water supply problem ..... 6                                             |
| Wholesale and retail trade; repair of motor vehicles, motorcycles, and personal and household goods ..... 7 |                                        | Other financial Inst..... 7             | Power supply problem..... 7                                              |
| Hotels and restaurants..... 8                                                                               |                                        | NGO/ Relief agency ..... 8              | Problems with equipment/ spare parts ..... 8                             |
| Transport, storage and communications 9                                                                     |                                        | Sale of assets ..... 9                  | Government regulations ..... 9                                           |
| Financial intermediation ..... 10                                                                           |                                        | Money lender ..... 10                   | Lack of raw materials ..... 10                                           |
| Real estate and business..... 11                                                                            |                                        | Other(specify) ..... 11                 | Lack of customers ..... 11                                               |
| Administration, security and social safety 12                                                               |                                        | Not applicable ..... 12                 | Transport problems ..... 12                                              |
| Education/Science ..... 13                                                                                  |                                        |                                         | Business problems owing to deterioration of laws and regulations..... 13 |
| Health and Social work..... 14                                                                              |                                        |                                         | Other ..... 14                                                           |
| Other social services ..... 15                                                                              |                                        |                                         | Not applicable ..... 15                                                  |
| Own household production..... 16                                                                            |                                        |                                         |                                                                          |
| Work Out of state ..... 17                                                                                  |                                        |                                         |                                                                          |
| Food processing ..... 21                                                                                    |                                        |                                         |                                                                          |
| Garments..... 22                                                                                            |                                        |                                         |                                                                          |
| Wooden furniture..... 23                                                                                    |                                        |                                         |                                                                          |
| Publishing/printing ..... 24                                                                                |                                        |                                         |                                                                          |
| Other industries..... 25                                                                                    |                                        |                                         |                                                                          |
| Fish farming..... 26                                                                                        |                                        |                                         |                                                                          |
| Forestry ..... 27                                                                                           |                                        |                                         |                                                                          |
| Wholesale ..... 28                                                                                          |                                        |                                         |                                                                          |
| Retailer ..... 29                                                                                           |                                        |                                         |                                                                          |
| Other business..... 30                                                                                      |                                        |                                         |                                                                          |
| Transportation..... 31                                                                                      |                                        |                                         |                                                                          |
| Communications ..... 32                                                                                     |                                        |                                         |                                                                          |
| Army/police/BDR..... 33                                                                                     |                                        |                                         |                                                                          |
| Arts/culture ..... 34                                                                                       |                                        |                                         |                                                                          |
| Sports/tourism/leisure ..... 35                                                                             |                                        |                                         |                                                                          |
| Banking/finances/loans ..... 36                                                                             |                                        |                                         |                                                                          |
| Management and administration..... 37                                                                       |                                        |                                         |                                                                          |
| Non-agricultural day labourer..... 38                                                                       |                                        |                                         |                                                                          |
| Others ..... 39                                                                                             |                                        |                                         |                                                                          |

|      |                      |                      |        |                      |                      |
|------|----------------------|----------------------|--------|----------------------|----------------------|
| Hour | <input type="text"/> | <input type="text"/> | Minute | <input type="text"/> | <input type="text"/> |
|------|----------------------|----------------------|--------|----------------------|----------------------|



Household Number:

**Module XX: Early Marriage (Female)**

**Module XXa: Early Marriage (Female)**

Module start time: Hour   Minu   Respondent ID:  Consent :  Yes...1  
No....2

[This module applies to female respondents only].

These questions are regarding all females who are married out and is currently below the age of 31, and who were members of the household during BIHS Round 1 Survey in 2011. The primary female is the respondent for this module. [Information on all females who were married out and is currently below the age of 31 but who have returned to this household permanently (due to separation, divorce or death of husband) will be recorded in the next module, **Module XXb**].

| Serial #   | ID  | Record ID number of all applicable females starting from ID MID | (MID from BIHS Round 1) Name | What was [name's] husband's age at the time of her marriage? | What was [name's] age at menarche? | What is her current educational attainment? (record highest class passed) | What was her educational attainment at the time of her marriage? (record highest class passed) | What is her husband's current educational attainment? (record highest class passed) | What was her husband's educational attainment at the time of her marriage? (record highest class passed) | What was [name's] age at the time of her marriage? | What is [name]'s father's educational attainment? | What is [name]'s mother's educational attainment? | Was [name's] father alive at the time of [name's] marriage? | What was [names]'s father's occupation at the time of [name's] marriage? | Was [name's] mother alive at the time of [name's] marriage? | How many brothers did [name] have at the time of marriage? | How many sisters did [name] have at the time of marriage? | Amount of dowry paid by family?<br>* Does not know ....99 |                   |                      | What amount of mahr/kabin was promised during [name's] marriage?<br><br>Note: For other religions, ask what amount of money was promised to [name] during marriage?<br><br>* Does not know ....99 | What amount of mahr/kabin has been paid off during the time of the [name's] marriage?<br><br>* Does not know ....99 | What were the main reason why [name]'s parents got [name] married before she turned 18? (choose multiple) |                      |         |         |         |
|------------|-----|-----------------------------------------------------------------|------------------------------|--------------------------------------------------------------|------------------------------------|---------------------------------------------------------------------------|------------------------------------------------------------------------------------------------|-------------------------------------------------------------------------------------|----------------------------------------------------------------------------------------------------------|----------------------------------------------------|---------------------------------------------------|---------------------------------------------------|-------------------------------------------------------------|--------------------------------------------------------------------------|-------------------------------------------------------------|------------------------------------------------------------|-----------------------------------------------------------|-----------------------------------------------------------|-------------------|----------------------|---------------------------------------------------------------------------------------------------------------------------------------------------------------------------------------------------|---------------------------------------------------------------------------------------------------------------------|-----------------------------------------------------------------------------------------------------------|----------------------|---------|---------|---------|
| Serial no. | PID | MID                                                             | Name                         | years                                                        | Years                              | Educ code                                                                 | Educ code                                                                                      | Educ code                                                                           | Educ code                                                                                                | years                                              | Educ code                                         | Educ code                                         | Code ↑                                                      | Occu code                                                                | Code ↑                                                      | No.                                                        | No.                                                       | Cash amount (TK):                                         | Gold amount (TK): | In-kind amount (TK): | (TK)                                                                                                                                                                                              | Cash amount (TK):                                                                                                   | Gold amount (TK):                                                                                         | In-kind amount (TK): | Code 1  |         |         |
|            |     |                                                                 |                              | xxa_01                                                       | xxa_02                             | xxa_03                                                                    | xxa_04                                                                                         | xxa_05                                                                              | xxa_06                                                                                                   | xxa_07                                             | xxa_08                                            | xxa_09                                            | xxa_10                                                      | xxa_11                                                                   | xxa_12                                                      | xxa_13                                                     | xxa_14                                                    | xxa_15a                                                   | xxa_15b           | xxa_15c              | xxa_16                                                                                                                                                                                            | xxa_17a                                                                                                             | xxa_17b                                                                                                   | xxa_17c              | xxa_18a | xxa_18b | xxa_18c |
|            |     |                                                                 |                              |                                                              |                                    |                                                                           |                                                                                                |                                                                                     |                                                                                                          |                                                    |                                                   |                                                   |                                                             |                                                                          |                                                             |                                                            |                                                           |                                                           |                   |                      |                                                                                                                                                                                                   |                                                                                                                     |                                                                                                           |                      |         |         |         |

Household Number:

**Code 1: Codes for reasons of early marriage**

She was harassed by local boys/men..... 1  
 Out of fear of harassment by boys/men..... 2  
 Thought the groom was very good and they might not get such a good choice again..... 3  
 Marriage proposals were coming for her..... 4  
 The girl herself wanted to marry ..... 5  
 If the girl gets more education, it will be difficult to find her equally or more educated groom ..... 6  
 If the girl gets more education, then parents might have to pay higher dowry to find her a good match ..... 7  
 If the girl gets older, then parents might have to pay higher dowry to find her a good match..... 8  
 Pressure from relatives ..... 9  
 Pressure from neighbors..... 10  
 Economic condition was poor to support her (food, education, clothing etc)..... 11  
 Not applicable; she was married after turning 18..... 12  
 Other (specify) ..... 96  
 Do not want to respond..... 88

Module End Time: 

|      |  |  |        |  |  |
|------|--|--|--------|--|--|
| Hour |  |  | Minute |  |  |
|------|--|--|--------|--|--|



Code 1: Codes for reasons of early marriage

She was harassed by local boys/men ..... 1  
 Out of fear of harassment by boys/men ..... 2  
 Thought the groom was very good and they might not get such a good choice again ..... 3  
 Marriage proposals were coming for her ..... 4  
 The girl herself wanted to marry ..... 5  
 If the girl gets more education, it will be difficult to find her equally or more educated groom ..... 6  
 If the girl gets more education, then parents might have to pay higher dowry to find her a good match ..... 7  
 If the girl gets older, then parents might have to pay higher dowry to find her a good match ..... 8  
 Pressure from relatives ..... 9  
 Pressure from neighbors ..... 10  
 Economic condition was poor to support her (food, education, clothing etc) ..... 11  
 Not applicable; she was married after turning 18 ..... 12  
 Other (specify) ..... 96  
 Do not want to respond ..... 88

Household Number:

Household Number:    **Module O: Food Consumption (Female)****Module O1: Purchases, Home Production and Other Sources (Female)**Module start time: Hour   Minu  Respondent ID:  Consent :  Yes ...1  
No....2

Collect information for last 7 days.

| Name of the item             | Code  | Did your household consume it in the last 7 days<br>Yes...1<br>No....2 | Total quantity consumed | Unit of measure?<br>Kg..... 1<br>Grams ..... 2<br>Liter..... 3<br>Number.... 4<br>Code ↑ | If the unit of measure is number, then write the average weight in grams | Quantity consumed from purchased food |            |                     |                                                                                                              | Quantity from own production | Quantity from other sources |                  |
|------------------------------|-------|------------------------------------------------------------------------|-------------------------|------------------------------------------------------------------------------------------|--------------------------------------------------------------------------|---------------------------------------|------------|---------------------|--------------------------------------------------------------------------------------------------------------|------------------------------|-----------------------------|------------------|
|                              |       |                                                                        |                         |                                                                                          |                                                                          | Quantity consumed                     | Unit price | Total value<br>(Tk) | Did you purchase on credit?<br>(note: if more than half bought on credit, write 'yes')<br>Yes...1<br>No....2 |                              | O1_09                       | O1_10            |
|                              | O1_01 | O1_02                                                                  | O1_03                   | O1_04                                                                                    | O1_05                                                                    | O1_06                                 | O1_07      | O1_08               | O1_09                                                                                                        | O1_10                        | O1_11                       | [Code1]<br>O1_12 |
| <b>Cereals</b>               |       |                                                                        |                         |                                                                                          |                                                                          |                                       |            |                     |                                                                                                              |                              |                             |                  |
| Parboiled rice (coarse)      | 1     |                                                                        |                         |                                                                                          |                                                                          |                                       |            |                     |                                                                                                              |                              |                             |                  |
| Non-parboiled rice (coarse)  | 2     |                                                                        |                         |                                                                                          |                                                                          |                                       |            |                     |                                                                                                              |                              |                             |                  |
| Fine rice                    | 3     |                                                                        |                         |                                                                                          |                                                                          |                                       |            |                     |                                                                                                              |                              |                             |                  |
| Rice flour                   | 4     |                                                                        |                         |                                                                                          |                                                                          |                                       |            |                     |                                                                                                              |                              |                             |                  |
| Suji (cream of wheat/barley) | 5     |                                                                        |                         |                                                                                          |                                                                          |                                       |            |                     |                                                                                                              |                              |                             |                  |
| Wheat                        | 6     |                                                                        |                         |                                                                                          |                                                                          |                                       |            |                     |                                                                                                              |                              |                             |                  |
| Atta                         | 7     |                                                                        |                         |                                                                                          |                                                                          |                                       |            |                     |                                                                                                              |                              |                             |                  |
| Maida (wheat flour w/o bran) | 8     |                                                                        |                         |                                                                                          |                                                                          |                                       |            |                     |                                                                                                              |                              |                             |                  |
| Semai/noodles                | 9     |                                                                        |                         |                                                                                          |                                                                          |                                       |            |                     |                                                                                                              |                              |                             |                  |
| Chaatu                       | 10    |                                                                        |                         |                                                                                          |                                                                          |                                       |            |                     |                                                                                                              |                              |                             |                  |
| Chira (flattened rice)       | 11    |                                                                        |                         |                                                                                          |                                                                          |                                       |            |                     |                                                                                                              |                              |                             |                  |
| Muri/Khoi (puffed rice)      | 12    |                                                                        |                         |                                                                                          |                                                                          |                                       |            |                     |                                                                                                              |                              |                             |                  |
| Barley                       | 13    |                                                                        |                         |                                                                                          |                                                                          |                                       |            |                     |                                                                                                              |                              |                             |                  |
| Sagu                         | 14    |                                                                        |                         |                                                                                          |                                                                          |                                       |            |                     |                                                                                                              |                              |                             |                  |
| Corn                         | 15    |                                                                        |                         |                                                                                          |                                                                          |                                       |            |                     |                                                                                                              |                              |                             |                  |
| Cerelac                      | 16    |                                                                        |                         |                                                                                          |                                                                          |                                       |            |                     |                                                                                                              |                              |                             |                  |
| Other                        | 901   |                                                                        |                         |                                                                                          |                                                                          |                                       |            |                     |                                                                                                              |                              |                             |                  |
| <b>Pulses</b>                |       |                                                                        |                         |                                                                                          |                                                                          |                                       |            |                     |                                                                                                              |                              |                             |                  |
| Lentil                       | 21    |                                                                        |                         |                                                                                          |                                                                          |                                       |            |                     |                                                                                                              |                              |                             |                  |
| Chick pea                    | 22    |                                                                        |                         |                                                                                          |                                                                          |                                       |            |                     |                                                                                                              |                              |                             |                  |
| Anchor daal                  | 23    |                                                                        |                         |                                                                                          |                                                                          |                                       |            |                     |                                                                                                              |                              |                             |                  |
| Black gram                   | 24    |                                                                        |                         |                                                                                          |                                                                          |                                       |            |                     |                                                                                                              |                              |                             |                  |
| Khesari                      | 25    |                                                                        |                         |                                                                                          |                                                                          |                                       |            |                     |                                                                                                              |                              |                             |                  |
| Mung                         | 26    |                                                                        |                         |                                                                                          |                                                                          |                                       |            |                     |                                                                                                              |                              |                             |                  |
| Pea                          | 27    |                                                                        |                         |                                                                                          |                                                                          |                                       |            |                     |                                                                                                              |                              |                             |                  |
| Shem bichi                   | 28    |                                                                        |                         |                                                                                          |                                                                          |                                       |            |                     |                                                                                                              |                              |                             |                  |
| Other pulses                 | 902   |                                                                        |                         |                                                                                          |                                                                          |                                       |            |                     |                                                                                                              |                              |                             |                  |
| <b>Edible oil</b>            |       |                                                                        |                         |                                                                                          |                                                                          |                                       |            |                     |                                                                                                              |                              |                             |                  |
| Soybean                      | 31    |                                                                        |                         |                                                                                          |                                                                          |                                       |            |                     |                                                                                                              |                              |                             |                  |
| Mustard                      | 32    |                                                                        |                         |                                                                                          |                                                                          |                                       |            |                     |                                                                                                              |                              |                             |                  |
| Dalda/banspati               | 33    |                                                                        |                         |                                                                                          |                                                                          |                                       |            |                     |                                                                                                              |                              |                             |                  |
| Ghee                         | 34    |                                                                        |                         |                                                                                          |                                                                          |                                       |            |                     |                                                                                                              |                              |                             |                  |
| Palm oil                     | 35    |                                                                        |                         |                                                                                          |                                                                          |                                       |            |                     |                                                                                                              |                              |                             |                  |

Household Number:

| Name of the item          | Code  | Did your household consume it in the last 7 days<br>Yes...1<br>No....2 | Total quantity consumed | Unit of measure?<br>Kg..... 1<br>Grams..... 2<br>Liter..... 3<br>Number.... 4 | If the unit of measure is number, then write the average weight in grams | Quantity consumed from purchased food |            |             |                                                                                                              | Quantity from own production | Quantity from other sources |         |
|---------------------------|-------|------------------------------------------------------------------------|-------------------------|-------------------------------------------------------------------------------|--------------------------------------------------------------------------|---------------------------------------|------------|-------------|--------------------------------------------------------------------------------------------------------------|------------------------------|-----------------------------|---------|
|                           |       |                                                                        |                         |                                                                               |                                                                          | Quantity consumed                     | Unit price | Total value | Did you purchase on credit?<br>(note: if more than half bought on credit, write 'yes')<br>Yes...1<br>No....2 |                              | Quantity                    | Source  |
|                           |       |                                                                        |                         | Code ↑                                                                        |                                                                          |                                       |            | (Tk)        |                                                                                                              |                              |                             | [Code1] |
|                           | O1_01 | O1_02                                                                  | O1_03                   | O1_04                                                                         | O1_05                                                                    | O1_06                                 | O1_07      | O1_08       | O1_09                                                                                                        | O1_10                        | O1_11                       | O1_12   |
| Sesame oil                | 36    |                                                                        |                         |                                                                               |                                                                          |                                       |            |             |                                                                                                              |                              |                             |         |
| Other oil                 | 903   |                                                                        |                         |                                                                               |                                                                          |                                       |            |             |                                                                                                              |                              |                             |         |
| <b>Vegetables</b>         |       |                                                                        |                         |                                                                               |                                                                          |                                       |            |             |                                                                                                              |                              |                             |         |
| Patal                     | 41    |                                                                        |                         |                                                                               |                                                                          |                                       |            |             |                                                                                                              |                              |                             |         |
| Bitter gourd              | 42    |                                                                        |                         |                                                                               |                                                                          |                                       |            |             |                                                                                                              |                              |                             |         |
| Okra                      | 43    |                                                                        |                         |                                                                               |                                                                          |                                       |            |             |                                                                                                              |                              |                             |         |
| Eggplant                  | 44    |                                                                        |                         |                                                                               |                                                                          |                                       |            |             |                                                                                                              |                              |                             |         |
| BT Brinjal                | 441   |                                                                        |                         |                                                                               |                                                                          |                                       |            |             |                                                                                                              |                              |                             |         |
| Tomato                    | 45    |                                                                        |                         |                                                                               |                                                                          |                                       |            |             |                                                                                                              |                              |                             |         |
| Pumpkin                   | 46    |                                                                        |                         |                                                                               |                                                                          |                                       |            |             |                                                                                                              |                              |                             |         |
| Sweet gourd               | 47    |                                                                        |                         |                                                                               |                                                                          |                                       |            |             |                                                                                                              |                              |                             |         |
| Ash gourd                 | 48    |                                                                        |                         |                                                                               |                                                                          |                                       |            |             |                                                                                                              |                              |                             |         |
| Long bean                 | 49    |                                                                        |                         |                                                                               |                                                                          |                                       |            |             |                                                                                                              |                              |                             |         |
| Water gourd               | 50    |                                                                        |                         |                                                                               |                                                                          |                                       |            |             |                                                                                                              |                              |                             |         |
| Sheem                     | 51    |                                                                        |                         |                                                                               |                                                                          |                                       |            |             |                                                                                                              |                              |                             |         |
| Carrot                    | 52    |                                                                        |                         |                                                                               |                                                                          |                                       |            |             |                                                                                                              |                              |                             |         |
| Radish                    | 53    |                                                                        |                         |                                                                               |                                                                          |                                       |            |             |                                                                                                              |                              |                             |         |
| Cauliflower               | 54    |                                                                        |                         |                                                                               |                                                                          |                                       |            |             |                                                                                                              |                              |                             |         |
| Green banana              | 55    |                                                                        |                         |                                                                               |                                                                          |                                       |            |             |                                                                                                              |                              |                             |         |
| Papaya                    | 56    |                                                                        |                         |                                                                               |                                                                          |                                       |            |             |                                                                                                              |                              |                             |         |
| Green chili               | 57    |                                                                        |                         |                                                                               |                                                                          |                                       |            |             |                                                                                                              |                              |                             |         |
| Cucumber                  | 58    |                                                                        |                         |                                                                               |                                                                          |                                       |            |             |                                                                                                              |                              |                             |         |
| Kachu (arum)              | 59    |                                                                        |                         |                                                                               |                                                                          |                                       |            |             |                                                                                                              |                              |                             |         |
| Danta (amaranth)          | 60    |                                                                        |                         |                                                                               |                                                                          |                                       |            |             |                                                                                                              |                              |                             |         |
| Potato                    | 61    |                                                                        |                         |                                                                               |                                                                          |                                       |            |             |                                                                                                              |                              |                             |         |
| White Sweet Potato        | 621   |                                                                        |                         |                                                                               |                                                                          |                                       |            |             |                                                                                                              |                              |                             |         |
| Orange Flesh Sweet Potato | 622   |                                                                        |                         |                                                                               |                                                                          |                                       |            |             |                                                                                                              |                              |                             |         |
| Green mango               | 63    |                                                                        |                         |                                                                               |                                                                          |                                       |            |             |                                                                                                              |                              |                             |         |
| Onion                     | 64    |                                                                        |                         |                                                                               |                                                                          |                                       |            |             |                                                                                                              |                              |                             |         |
| Garlic                    | 65    |                                                                        |                         |                                                                               |                                                                          |                                       |            |             |                                                                                                              |                              |                             |         |
| Dhundal                   | 66    |                                                                        |                         |                                                                               |                                                                          |                                       |            |             |                                                                                                              |                              |                             |         |
| Shapla                    | 67    |                                                                        |                         |                                                                               |                                                                          |                                       |            |             |                                                                                                              |                              |                             |         |
| Kachur lati               | 68    |                                                                        |                         |                                                                               |                                                                          |                                       |            |             |                                                                                                              |                              |                             |         |
| Jhinga (ribbed gourd)     | 69    |                                                                        |                         |                                                                               |                                                                          |                                       |            |             |                                                                                                              |                              |                             |         |
| Green pea                 | 70    |                                                                        |                         |                                                                               |                                                                          |                                       |            |             |                                                                                                              |                              |                             |         |
| Fig                       | 71    |                                                                        |                         |                                                                               |                                                                          |                                       |            |             |                                                                                                              |                              |                             |         |
| Drum stick                | 72    |                                                                        |                         |                                                                               |                                                                          |                                       |            |             |                                                                                                              |                              |                             |         |
| Snake gourd               | 73    |                                                                        |                         |                                                                               |                                                                          |                                       |            |             |                                                                                                              |                              |                             |         |
| Green jackfruit           | 74    |                                                                        |                         |                                                                               |                                                                          |                                       |            |             |                                                                                                              |                              |                             |         |
| Kolar mocha               | 75    |                                                                        |                         |                                                                               |                                                                          |                                       |            |             |                                                                                                              |                              |                             |         |
| Mete alu                  | 76    |                                                                        |                         |                                                                               |                                                                          |                                       |            |             |                                                                                                              |                              |                             |         |

Household Number:

| Name of the item           | Code | Did your household consume it in the last 7 days<br>Yes...1<br>No....2 | Total quantity consumed | Unit of measure?<br>Kg..... 1<br>Grams..... 2<br>Liter..... 3<br>Number.... 4 | If the unit of measure is number, then write the average weight in grams | Quantity consumed from purchased food |            |             |                                                                                                              | Quantity from own production | Quantity from other sources |        |       |
|----------------------------|------|------------------------------------------------------------------------|-------------------------|-------------------------------------------------------------------------------|--------------------------------------------------------------------------|---------------------------------------|------------|-------------|--------------------------------------------------------------------------------------------------------------|------------------------------|-----------------------------|--------|-------|
|                            |      |                                                                        |                         |                                                                               |                                                                          | Quantity consumed                     | Unit price | Total value | Did you purchase on credit?<br>(note: if more than half bought on credit, write 'yes')<br>Yes...1<br>No....2 |                              | Quantity                    | Source |       |
|                            |      |                                                                        |                         |                                                                               |                                                                          | (Tk)                                  |            |             |                                                                                                              |                              | [Code1]                     |        |       |
|                            |      | O1_01                                                                  | O1_02                   | O1_03                                                                         | O1_04                                                                    | O1_05                                 | O1_06      | O1_07       | O1_08                                                                                                        | O1_09                        | O1_10                       | O1_11  | O1_12 |
| Beher gura                 | 77   |                                                                        |                         |                                                                               |                                                                          |                                       |            |             |                                                                                                              |                              |                             |        |       |
| Soybean bori               | 78   |                                                                        |                         |                                                                               |                                                                          |                                       |            |             |                                                                                                              |                              |                             |        |       |
| Jack fruit seed            | 79   |                                                                        |                         |                                                                               |                                                                          |                                       |            |             |                                                                                                              |                              |                             |        |       |
| Cabbage                    | 80   |                                                                        |                         |                                                                               |                                                                          |                                       |            |             |                                                                                                              |                              |                             |        |       |
| Kakrol                     | 81   |                                                                        |                         |                                                                               |                                                                          |                                       |            |             |                                                                                                              |                              |                             |        |       |
| Shalgom                    | 82   |                                                                        |                         |                                                                               |                                                                          |                                       |            |             |                                                                                                              |                              |                             |        |       |
| Other                      | 904  |                                                                        |                         |                                                                               |                                                                          |                                       |            |             |                                                                                                              |                              |                             |        |       |
| <b>Leafy vegetables</b>    |      |                                                                        |                         |                                                                               |                                                                          |                                       |            |             |                                                                                                              |                              |                             |        |       |
| Pui (Indian spinach)       | 86   |                                                                        |                         |                                                                               |                                                                          |                                       |            |             |                                                                                                              |                              |                             |        |       |
| Lal Shak (red amaranth)    | 87   |                                                                        |                         |                                                                               |                                                                          |                                       |            |             |                                                                                                              |                              |                             |        |       |
| Bathua                     | 88   |                                                                        |                         |                                                                               |                                                                          |                                       |            |             |                                                                                                              |                              |                             |        |       |
| Bokful                     | 89   |                                                                        |                         |                                                                               |                                                                          |                                       |            |             |                                                                                                              |                              |                             |        |       |
| Cabbage                    | 90   |                                                                        |                         |                                                                               |                                                                          |                                       |            |             |                                                                                                              |                              |                             |        |       |
| Danta Shak                 | 91   |                                                                        |                         |                                                                               |                                                                          |                                       |            |             |                                                                                                              |                              |                             |        |       |
| Helencha                   | 92   |                                                                        |                         |                                                                               |                                                                          |                                       |            |             |                                                                                                              |                              |                             |        |       |
| Kalmi Shak                 | 93   |                                                                        |                         |                                                                               |                                                                          |                                       |            |             |                                                                                                              |                              |                             |        |       |
| Kachu Shak                 | 94   |                                                                        |                         |                                                                               |                                                                          |                                       |            |             |                                                                                                              |                              |                             |        |       |
| Kalo kachu Shak            | 95   |                                                                        |                         |                                                                               |                                                                          |                                       |            |             |                                                                                                              |                              |                             |        |       |
| Katanate                   | 96   |                                                                        |                         |                                                                               |                                                                          |                                       |            |             |                                                                                                              |                              |                             |        |       |
| Lau Shak                   | 97   |                                                                        |                         |                                                                               |                                                                          |                                       |            |             |                                                                                                              |                              |                             |        |       |
| Pat Shak                   | 98   |                                                                        |                         |                                                                               |                                                                          |                                       |            |             |                                                                                                              |                              |                             |        |       |
| Dheki Shak                 | 99   |                                                                        |                         |                                                                               |                                                                          |                                       |            |             |                                                                                                              |                              |                             |        |       |
| Dhania Shak                | 100  |                                                                        |                         |                                                                               |                                                                          |                                       |            |             |                                                                                                              |                              |                             |        |       |
| Palang Shak (spinach)      | 101  |                                                                        |                         |                                                                               |                                                                          |                                       |            |             |                                                                                                              |                              |                             |        |       |
| Onion/garlic stalk         | 102  |                                                                        |                         |                                                                               |                                                                          |                                       |            |             |                                                                                                              |                              |                             |        |       |
| Pea leaves                 | 103  |                                                                        |                         |                                                                               |                                                                          |                                       |            |             |                                                                                                              |                              |                             |        |       |
| Drumstick leaves           | 104  |                                                                        |                         |                                                                               |                                                                          |                                       |            |             |                                                                                                              |                              |                             |        |       |
| Mustard leaves             | 105  |                                                                        |                         |                                                                               |                                                                          |                                       |            |             |                                                                                                              |                              |                             |        |       |
| Radish leaves              | 106  |                                                                        |                         |                                                                               |                                                                          |                                       |            |             |                                                                                                              |                              |                             |        |       |
| Mixed leafy vegetables     | 107  |                                                                        |                         |                                                                               |                                                                          |                                       |            |             |                                                                                                              |                              |                             |        |       |
| Dudhali Pata               | 108  |                                                                        |                         |                                                                               |                                                                          |                                       |            |             |                                                                                                              |                              |                             |        |       |
| Black gram leaves          | 109  |                                                                        |                         |                                                                               |                                                                          |                                       |            |             |                                                                                                              |                              |                             |        |       |
| Shechi Shak                | 110  |                                                                        |                         |                                                                               |                                                                          |                                       |            |             |                                                                                                              |                              |                             |        |       |
| Swett gourd leaves         | 111  |                                                                        |                         |                                                                               |                                                                          |                                       |            |             |                                                                                                              |                              |                             |        |       |
| Khesari Shak               | 112  |                                                                        |                         |                                                                               |                                                                          |                                       |            |             |                                                                                                              |                              |                             |        |       |
| Geema Shak                 | 113  |                                                                        |                         |                                                                               |                                                                          |                                       |            |             |                                                                                                              |                              |                             |        |       |
| Neem Shak                  | 114  |                                                                        |                         |                                                                               |                                                                          |                                       |            |             |                                                                                                              |                              |                             |        |       |
| Darkuni Shak               | 115  |                                                                        |                         |                                                                               |                                                                          |                                       |            |             |                                                                                                              |                              |                             |        |       |
| Other leafy vegetables     | 905  |                                                                        |                         |                                                                               |                                                                          |                                       |            |             |                                                                                                              |                              |                             |        |       |
| <b>Meat, eggs and milk</b> |      |                                                                        |                         |                                                                               |                                                                          |                                       |            |             |                                                                                                              |                              |                             |        |       |
| Beef/buffalo               | 121  |                                                                        |                         |                                                                               |                                                                          |                                       |            |             |                                                                                                              |                              |                             |        |       |

Household Number:

| Name of the item      | Code | Did your household consume it in the last 7 days<br>Yes...1<br>No....2 | Total quantity consumed | Unit of measure?<br>Kg..... 1<br>Grams..... 2<br>Liter..... 3<br>Number.... 4 | If the unit of measure is number, then write the average weight in grams | Quantity consumed from purchased food |            |             |                                                                                                              | Quantity from own production | Quantity from other sources |        |       |
|-----------------------|------|------------------------------------------------------------------------|-------------------------|-------------------------------------------------------------------------------|--------------------------------------------------------------------------|---------------------------------------|------------|-------------|--------------------------------------------------------------------------------------------------------------|------------------------------|-----------------------------|--------|-------|
|                       |      |                                                                        |                         |                                                                               |                                                                          | Quantity consumed                     | Unit price | Total value | Did you purchase on credit?<br>(note: if more than half bought on credit, write 'yes')<br>Yes...1<br>No....2 |                              | Quantity                    | Source |       |
|                       |      |                                                                        |                         |                                                                               |                                                                          | (Tk)                                  |            |             |                                                                                                              |                              | [Code1]                     |        |       |
|                       |      | O1_01                                                                  | O1_02                   | O1_03                                                                         | O1_04                                                                    | O1_05                                 | O1_06      | O1_07       | O1_08                                                                                                        | O1_09                        | O1_10                       | O1_11  | O1_12 |
| Mutton                | 122  |                                                                        |                         |                                                                               |                                                                          |                                       |            |             |                                                                                                              |                              |                             |        |       |
| Chicken               | 123  |                                                                        |                         |                                                                               |                                                                          |                                       |            |             |                                                                                                              |                              |                             |        |       |
| Duck                  | 124  |                                                                        |                         |                                                                               |                                                                          |                                       |            |             |                                                                                                              |                              |                             |        |       |
| Pigeon                | 125  |                                                                        |                         |                                                                               |                                                                          |                                       |            |             |                                                                                                              |                              |                             |        |       |
| Bids/bok/gughu        | 126  |                                                                        |                         |                                                                               |                                                                          |                                       |            |             |                                                                                                              |                              |                             |        |       |
| Pig                   | 322  |                                                                        |                         |                                                                               |                                                                          |                                       |            |             |                                                                                                              |                              |                             |        |       |
| Liver                 | 127  |                                                                        |                         |                                                                               |                                                                          |                                       |            |             |                                                                                                              |                              |                             |        |       |
| Stomach of beef/goat  | 128  |                                                                        |                         |                                                                               |                                                                          |                                       |            |             |                                                                                                              |                              |                             |        |       |
| Dried meat            | 129  |                                                                        |                         |                                                                               |                                                                          |                                       |            |             |                                                                                                              |                              |                             |        |       |
| Egg                   | 130  |                                                                        |                         |                                                                               |                                                                          |                                       |            |             |                                                                                                              |                              |                             |        |       |
| Fish egg              | 131  |                                                                        |                         |                                                                               |                                                                          |                                       |            |             |                                                                                                              |                              |                             |        |       |
| Milk                  | 132  |                                                                        |                         |                                                                               |                                                                          |                                       |            |             |                                                                                                              |                              |                             |        |       |
| Powdered Milk         | 133  |                                                                        |                         |                                                                               |                                                                          |                                       |            |             |                                                                                                              |                              |                             |        |       |
| Condensed Milk        | 134  |                                                                        |                         |                                                                               |                                                                          |                                       |            |             |                                                                                                              |                              |                             |        |       |
| Butter                | 135  |                                                                        |                         |                                                                               |                                                                          |                                       |            |             |                                                                                                              |                              |                             |        |       |
| Other meat            | 906  |                                                                        |                         |                                                                               |                                                                          |                                       |            |             |                                                                                                              |                              |                             |        |       |
| <b>Fruits</b>         |      |                                                                        |                         |                                                                               |                                                                          |                                       |            |             |                                                                                                              |                              |                             |        |       |
| Mango                 | 141  |                                                                        |                         |                                                                               |                                                                          |                                       |            |             |                                                                                                              |                              |                             |        |       |
| Banana                | 142  |                                                                        |                         |                                                                               |                                                                          |                                       |            |             |                                                                                                              |                              |                             |        |       |
| Papaya                | 143  |                                                                        |                         |                                                                               |                                                                          |                                       |            |             |                                                                                                              |                              |                             |        |       |
| Orange                | 144  |                                                                        |                         |                                                                               |                                                                          |                                       |            |             |                                                                                                              |                              |                             |        |       |
| Apple                 | 145  |                                                                        |                         |                                                                               |                                                                          |                                       |            |             |                                                                                                              |                              |                             |        |       |
| Coconut               | 146  |                                                                        |                         |                                                                               |                                                                          |                                       |            |             |                                                                                                              |                              |                             |        |       |
| Jack Fruit            | 147  |                                                                        |                         |                                                                               |                                                                          |                                       |            |             |                                                                                                              |                              |                             |        |       |
| Litchis               | 148  |                                                                        |                         |                                                                               |                                                                          |                                       |            |             |                                                                                                              |                              |                             |        |       |
| Black berry           | 149  |                                                                        |                         |                                                                               |                                                                          |                                       |            |             |                                                                                                              |                              |                             |        |       |
| Bel                   | 150  |                                                                        |                         |                                                                               |                                                                          |                                       |            |             |                                                                                                              |                              |                             |        |       |
| Pomelo                | 151  |                                                                        |                         |                                                                               |                                                                          |                                       |            |             |                                                                                                              |                              |                             |        |       |
| Grapes                | 152  |                                                                        |                         |                                                                               |                                                                          |                                       |            |             |                                                                                                              |                              |                             |        |       |
| Amra                  | 153  |                                                                        |                         |                                                                               |                                                                          |                                       |            |             |                                                                                                              |                              |                             |        |       |
| Karambola             | 154  |                                                                        |                         |                                                                               |                                                                          |                                       |            |             |                                                                                                              |                              |                             |        |       |
| Guava                 | 155  |                                                                        |                         |                                                                               |                                                                          |                                       |            |             |                                                                                                              |                              |                             |        |       |
| Jujube/dried jujube   | 156  |                                                                        |                         |                                                                               |                                                                          |                                       |            |             |                                                                                                              |                              |                             |        |       |
| Olive                 | 157  |                                                                        |                         |                                                                               |                                                                          |                                       |            |             |                                                                                                              |                              |                             |        |       |
| Tamarind              | 158  |                                                                        |                         |                                                                               |                                                                          |                                       |            |             |                                                                                                              |                              |                             |        |       |
| Dalim                 | 159  |                                                                        |                         |                                                                               |                                                                          |                                       |            |             |                                                                                                              |                              |                             |        |       |
| Lemon                 | 160  |                                                                        |                         |                                                                               |                                                                          |                                       |            |             |                                                                                                              |                              |                             |        |       |
| Dates                 | 161  |                                                                        |                         |                                                                               |                                                                          |                                       |            |             |                                                                                                              |                              |                             |        |       |
| Sugarcane             | 162  |                                                                        |                         |                                                                               |                                                                          |                                       |            |             |                                                                                                              |                              |                             |        |       |
| Green Coconut         | 163  |                                                                        |                         |                                                                               |                                                                          |                                       |            |             |                                                                                                              |                              |                             |        |       |
| Ata (bullock's heart) | 164  |                                                                        |                         |                                                                               |                                                                          |                                       |            |             |                                                                                                              |                              |                             |        |       |



Household Number:    

| Name of the item             | Code | Did your household consume it in the last 7 days<br>Yes...1<br>No....2 | Total quantity consumed | Unit of measure?<br>Kg..... 1<br>Grams..... 2<br>Liter..... 3<br>Number.... 4 | If the unit of measure is number, then write the average weight in grams | Quantity consumed from purchased food |            |             |                                                                                                              | Quantity from own production | Quantity from other sources |        |
|------------------------------|------|------------------------------------------------------------------------|-------------------------|-------------------------------------------------------------------------------|--------------------------------------------------------------------------|---------------------------------------|------------|-------------|--------------------------------------------------------------------------------------------------------------|------------------------------|-----------------------------|--------|
|                              |      |                                                                        |                         |                                                                               |                                                                          | Quantity consumed                     | Unit price | Total value | Did you purchase on credit?<br>(note: if more than half bought on credit, write 'yes')<br>Yes...1<br>No....2 |                              | Quantity                    | Source |
|                              |      |                                                                        |                         |                                                                               |                                                                          | (Tk)                                  |            |             |                                                                                                              |                              | [Code1]                     |        |
| O1_01                        |      | O1_02                                                                  | O1_03                   | O1_04                                                                         | O1_05                                                                    | O1_06                                 | O1_07      | O1_08       | O1_09                                                                                                        | O1_10                        | O1_11                       | O1_12  |
| Chalta                       | 165  |                                                                        |                         |                                                                               |                                                                          |                                       |            |             |                                                                                                              |                              |                             |        |
| Tarmuj (Watermelon)          | 166  |                                                                        |                         |                                                                               |                                                                          |                                       |            |             |                                                                                                              |                              |                             |        |
| Bangi (Musk melon)           | 167  |                                                                        |                         |                                                                               |                                                                          |                                       |            |             |                                                                                                              |                              |                             |        |
| Pineapple                    | 168  |                                                                        |                         |                                                                               |                                                                          |                                       |            |             |                                                                                                              |                              |                             |        |
| Sobeda                       | 169  |                                                                        |                         |                                                                               |                                                                          |                                       |            |             |                                                                                                              |                              |                             |        |
| Jaamrul                      | 170  |                                                                        |                         |                                                                               |                                                                          |                                       |            |             |                                                                                                              |                              |                             |        |
| Myrobalan/ Indian Gooseberry | 317  |                                                                        |                         |                                                                               |                                                                          |                                       |            |             |                                                                                                              |                              |                             |        |
| Water Caltrop                | 319  |                                                                        |                         |                                                                               |                                                                          |                                       |            |             |                                                                                                              |                              |                             |        |
| Other fruit                  | 907  |                                                                        |                         |                                                                               |                                                                          |                                       |            |             |                                                                                                              |                              |                             |        |
| <b>Fish (large)</b>          |      |                                                                        |                         |                                                                               |                                                                          |                                       |            |             |                                                                                                              |                              |                             |        |
| Rui                          | 176  |                                                                        |                         |                                                                               |                                                                          |                                       |            |             |                                                                                                              |                              |                             |        |
| Katla                        | 177  |                                                                        |                         |                                                                               |                                                                          |                                       |            |             |                                                                                                              |                              |                             |        |
| Mrigel                       | 178  |                                                                        |                         |                                                                               |                                                                          |                                       |            |             |                                                                                                              |                              |                             |        |
| Kalibaus                     | 179  |                                                                        |                         |                                                                               |                                                                          |                                       |            |             |                                                                                                              |                              |                             |        |
| Surma                        | 180  |                                                                        |                         |                                                                               |                                                                          |                                       |            |             |                                                                                                              |                              |                             |        |
| Chital                       | 181  |                                                                        |                         |                                                                               |                                                                          |                                       |            |             |                                                                                                              |                              |                             |        |
| Boal                         | 182  |                                                                        |                         |                                                                               |                                                                          |                                       |            |             |                                                                                                              |                              |                             |        |
| Aair                         | 183  |                                                                        |                         |                                                                               |                                                                          |                                       |            |             |                                                                                                              |                              |                             |        |
| Pangash                      | 184  |                                                                        |                         |                                                                               |                                                                          |                                       |            |             |                                                                                                              |                              |                             |        |
| Ritha                        | 185  |                                                                        |                         |                                                                               |                                                                          |                                       |            |             |                                                                                                              |                              |                             |        |
| Hilsa                        | 186  |                                                                        |                         |                                                                               |                                                                          |                                       |            |             |                                                                                                              |                              |                             |        |
| Jatka                        | 187  |                                                                        |                         |                                                                               |                                                                          |                                       |            |             |                                                                                                              |                              |                             |        |
| Grass Carp                   | 188  |                                                                        |                         |                                                                               |                                                                          |                                       |            |             |                                                                                                              |                              |                             |        |
| Mirror Carp                  | 189  |                                                                        |                         |                                                                               |                                                                          |                                       |            |             |                                                                                                              |                              |                             |        |
| Silver Carp                  | 190  |                                                                        |                         |                                                                               |                                                                          |                                       |            |             |                                                                                                              |                              |                             |        |
| Telapia                      | 191  |                                                                        |                         |                                                                               |                                                                          |                                       |            |             |                                                                                                              |                              |                             |        |
| Swarputi                     | 192  |                                                                        |                         |                                                                               |                                                                          |                                       |            |             |                                                                                                              |                              |                             |        |
| Chital                       | 193  |                                                                        |                         |                                                                               |                                                                          |                                       |            |             |                                                                                                              |                              |                             |        |
| Taki                         | 194  |                                                                        |                         |                                                                               |                                                                          |                                       |            |             |                                                                                                              |                              |                             |        |
| Mague                        | 195  |                                                                        |                         |                                                                               |                                                                          |                                       |            |             |                                                                                                              |                              |                             |        |
| Singi                        | 196  |                                                                        |                         |                                                                               |                                                                          |                                       |            |             |                                                                                                              |                              |                             |        |
| Baim                         | 197  |                                                                        |                         |                                                                               |                                                                          |                                       |            |             |                                                                                                              |                              |                             |        |
| Koi                          | 198  |                                                                        |                         |                                                                               |                                                                          |                                       |            |             |                                                                                                              |                              |                             |        |
| Meni                         | 199  |                                                                        |                         |                                                                               |                                                                          |                                       |            |             |                                                                                                              |                              |                             |        |
| Shapla/padda/rupsha fish     | 200  |                                                                        |                         |                                                                               |                                                                          |                                       |            |             |                                                                                                              |                              |                             |        |
| Bagda Chingree               | 201  |                                                                        |                         |                                                                               |                                                                          |                                       |            |             |                                                                                                              |                              |                             |        |
| Golda Chingree               | 202  |                                                                        |                         |                                                                               |                                                                          |                                       |            |             |                                                                                                              |                              |                             |        |
| Tortoise meat                | 203  |                                                                        |                         |                                                                               |                                                                          |                                       |            |             |                                                                                                              |                              |                             |        |
| Poona fish                   | 204  |                                                                        |                         |                                                                               |                                                                          |                                       |            |             |                                                                                                              |                              |                             |        |
| Dried fish                   | 205  |                                                                        |                         |                                                                               |                                                                          |                                       |            |             |                                                                                                              |                              |                             |        |
| Other big fish               | 908  |                                                                        |                         |                                                                               |                                                                          |                                       |            |             |                                                                                                              |                              |                             |        |

Household Number:

| Name of the item         | Code  | Did your household consume it in the last 7 days<br>Yes...1<br>No....2 | Total quantity consumed | Unit of measure?<br>Kg..... 1<br>Grams..... 2<br>Liter..... 3<br>Number.... 4 | If the unit of measure is number, then write the average weight in grams | Quantity consumed from purchased food |            |             |                                                                                                              | Quantity from own production | Quantity from other sources |         |
|--------------------------|-------|------------------------------------------------------------------------|-------------------------|-------------------------------------------------------------------------------|--------------------------------------------------------------------------|---------------------------------------|------------|-------------|--------------------------------------------------------------------------------------------------------------|------------------------------|-----------------------------|---------|
|                          |       |                                                                        |                         |                                                                               |                                                                          | Quantity consumed                     | Unit price | Total value | Did you purchase on credit?<br>(note: if more than half bought on credit, write 'yes')<br>Yes...1<br>No....2 |                              | Quantity                    | Source  |
|                          |       |                                                                        |                         | Code ↑                                                                        |                                                                          |                                       |            | (Tk)        |                                                                                                              |                              |                             | [Code1] |
|                          | O1_01 | O1_02                                                                  | O1_03                   | O1_04                                                                         | O1_05                                                                    | O1_06                                 | O1_07      | O1_08       | O1_09                                                                                                        | O1_10                        | O1_11                       | O1_12   |
| <b>Fish (small)</b>      |       |                                                                        |                         |                                                                               |                                                                          |                                       |            |             |                                                                                                              |                              |                             |         |
| Gura mach                | 211   |                                                                        |                         |                                                                               |                                                                          |                                       |            |             |                                                                                                              |                              |                             |         |
| Panch mishali            | 212   |                                                                        |                         |                                                                               |                                                                          |                                       |            |             |                                                                                                              |                              |                             |         |
| Puti                     | 213   |                                                                        |                         |                                                                               |                                                                          |                                       |            |             |                                                                                                              |                              |                             |         |
| Tengra                   | 214   |                                                                        |                         |                                                                               |                                                                          |                                       |            |             |                                                                                                              |                              |                             |         |
| Pabda                    | 215   |                                                                        |                         |                                                                               |                                                                          |                                       |            |             |                                                                                                              |                              |                             |         |
| Moa/mola                 | 216   |                                                                        |                         |                                                                               |                                                                          |                                       |            |             |                                                                                                              |                              |                             |         |
| Dhela                    | 217   |                                                                        |                         |                                                                               |                                                                          |                                       |            |             |                                                                                                              |                              |                             |         |
| Batashi                  | 218   |                                                                        |                         |                                                                               |                                                                          |                                       |            |             |                                                                                                              |                              |                             |         |
| Kachki                   | 219   |                                                                        |                         |                                                                               |                                                                          |                                       |            |             |                                                                                                              |                              |                             |         |
| Chanda                   | 220   |                                                                        |                         |                                                                               |                                                                          |                                       |            |             |                                                                                                              |                              |                             |         |
| Khalisa                  | 221   |                                                                        |                         |                                                                               |                                                                          |                                       |            |             |                                                                                                              |                              |                             |         |
| Chela                    | 222   |                                                                        |                         |                                                                               |                                                                          |                                       |            |             |                                                                                                              |                              |                             |         |
| Chapila                  | 223   |                                                                        |                         |                                                                               |                                                                          |                                       |            |             |                                                                                                              |                              |                             |         |
| Kajari                   | 224   |                                                                        |                         |                                                                               |                                                                          |                                       |            |             |                                                                                                              |                              |                             |         |
| Tatkeni                  | 225   |                                                                        |                         |                                                                               |                                                                          |                                       |            |             |                                                                                                              |                              |                             |         |
| Bata                     | 226   |                                                                        |                         |                                                                               |                                                                          |                                       |            |             |                                                                                                              |                              |                             |         |
| Ghutum                   | 227   |                                                                        |                         |                                                                               |                                                                          |                                       |            |             |                                                                                                              |                              |                             |         |
| Bele                     | 228   |                                                                        |                         |                                                                               |                                                                          |                                       |            |             |                                                                                                              |                              |                             |         |
| Chewa                    | 229   |                                                                        |                         |                                                                               |                                                                          |                                       |            |             |                                                                                                              |                              |                             |         |
| Poa                      | 230   |                                                                        |                         |                                                                               |                                                                          |                                       |            |             |                                                                                                              |                              |                             |         |
| Foli                     | 231   |                                                                        |                         |                                                                               |                                                                          |                                       |            |             |                                                                                                              |                              |                             |         |
| Bacha                    | 232   |                                                                        |                         |                                                                               |                                                                          |                                       |            |             |                                                                                                              |                              |                             |         |
| Baicha                   | 233   |                                                                        |                         |                                                                               |                                                                          |                                       |            |             |                                                                                                              |                              |                             |         |
| Kaikla                   | 234   |                                                                        |                         |                                                                               |                                                                          |                                       |            |             |                                                                                                              |                              |                             |         |
| Darkini                  | 235   |                                                                        |                         |                                                                               |                                                                          |                                       |            |             |                                                                                                              |                              |                             |         |
| Palshe                   | 236   |                                                                        |                         |                                                                               |                                                                          |                                       |            |             |                                                                                                              |                              |                             |         |
| Harkun                   | 237   |                                                                        |                         |                                                                               |                                                                          |                                       |            |             |                                                                                                              |                              |                             |         |
| Karfu fish               | 238   |                                                                        |                         |                                                                               |                                                                          |                                       |            |             |                                                                                                              |                              |                             |         |
| Kakra                    | 239   |                                                                        |                         |                                                                               |                                                                          |                                       |            |             |                                                                                                              |                              |                             |         |
| Small prawn              | 240   |                                                                        |                         |                                                                               |                                                                          |                                       |            |             |                                                                                                              |                              |                             |         |
| Dried small shrimp/prawn | 241   |                                                                        |                         |                                                                               |                                                                          |                                       |            |             |                                                                                                              |                              |                             |         |
| Dried small fish         | 242   |                                                                        |                         |                                                                               |                                                                          |                                       |            |             |                                                                                                              |                              |                             |         |
| Fermented fish           | 243   |                                                                        |                         |                                                                               |                                                                          |                                       |            |             |                                                                                                              |                              |                             |         |
| Other small fish         | 909   |                                                                        |                         |                                                                               |                                                                          |                                       |            |             |                                                                                                              |                              |                             |         |
| <b>Spices</b>            |       |                                                                        |                         |                                                                               |                                                                          |                                       |            |             |                                                                                                              |                              |                             |         |
| Dried chili              | 246   |                                                                        |                         |                                                                               |                                                                          |                                       |            |             |                                                                                                              |                              |                             |         |
| Turmeric (not dried)     | 247   |                                                                        |                         |                                                                               |                                                                          |                                       |            |             |                                                                                                              |                              |                             |         |
| Turmeric (dried)         | 248   |                                                                        |                         |                                                                               |                                                                          |                                       |            |             |                                                                                                              |                              |                             |         |
| Jira                     | 249   |                                                                        |                         |                                                                               |                                                                          |                                       |            |             |                                                                                                              |                              |                             |         |
| Elachi                   | 250   |                                                                        |                         |                                                                               |                                                                          |                                       |            |             |                                                                                                              |                              |                             |         |

Household Number:

| Name of the item                             | Code  | Did your household consume it in the last 7 days<br>Yes...1<br>No....2 | Total quantity consumed | Unit of measure?<br>Kg..... 1<br>Grams..... 2<br>Liter..... 3<br>Number.... 4 | If the unit of measure is number, then write the average weight in grams | Quantity consumed from purchased food |            |             |                                                                                                              | Quantity from own production | Quantity from other sources |        |
|----------------------------------------------|-------|------------------------------------------------------------------------|-------------------------|-------------------------------------------------------------------------------|--------------------------------------------------------------------------|---------------------------------------|------------|-------------|--------------------------------------------------------------------------------------------------------------|------------------------------|-----------------------------|--------|
|                                              |       |                                                                        |                         |                                                                               |                                                                          | Quantity consumed                     | Unit price | Total value | Did you purchase on credit?<br>(note: if more than half bought on credit, write 'yes')<br>Yes...1<br>No....2 |                              | Quantity                    | Source |
|                                              |       |                                                                        |                         | Code ↑                                                                        |                                                                          |                                       |            | (Tk)        |                                                                                                              |                              | [Code1]                     |        |
|                                              | O1_01 | O1_02                                                                  | O1_03                   | O1_04                                                                         | O1_05                                                                    | O1_06                                 | O1_07      | O1_08       | O1_09                                                                                                        | O1_10                        | O1_11                       | O1_12  |
| Cinnamon                                     | 251   |                                                                        |                         |                                                                               |                                                                          |                                       |            |             |                                                                                                              |                              |                             |        |
| Salt (Ordinary)                              | 2521  |                                                                        |                         |                                                                               |                                                                          |                                       |            |             |                                                                                                              |                              |                             |        |
| Salt (Iodine)                                | 2522  |                                                                        |                         |                                                                               |                                                                          |                                       |            |             |                                                                                                              |                              |                             |        |
| Panchforan                                   | 253   |                                                                        |                         |                                                                               |                                                                          |                                       |            |             |                                                                                                              |                              |                             |        |
| Coriander                                    | 254   |                                                                        |                         |                                                                               |                                                                          |                                       |            |             |                                                                                                              |                              |                             |        |
| Ginger                                       | 255   |                                                                        |                         |                                                                               |                                                                          |                                       |            |             |                                                                                                              |                              |                             |        |
| Garam Masala                                 | 256   |                                                                        |                         |                                                                               |                                                                          |                                       |            |             |                                                                                                              |                              |                             |        |
| Black cumin                                  | 257   |                                                                        |                         |                                                                               |                                                                          |                                       |            |             |                                                                                                              |                              |                             |        |
| Mustard                                      | 258   |                                                                        |                         |                                                                               |                                                                          |                                       |            |             |                                                                                                              |                              |                             |        |
| Til (sesame)                                 | 259   |                                                                        |                         |                                                                               |                                                                          |                                       |            |             |                                                                                                              |                              |                             |        |
| Mouri                                        | 260   |                                                                        |                         |                                                                               |                                                                          |                                       |            |             |                                                                                                              |                              |                             |        |
| Babuni/randhuni                              | 261   |                                                                        |                         |                                                                               |                                                                          |                                       |            |             |                                                                                                              |                              |                             |        |
| Tishi                                        | 262   |                                                                        |                         |                                                                               |                                                                          |                                       |            |             |                                                                                                              |                              |                             |        |
| Tejpata                                      | 263   |                                                                        |                         |                                                                               |                                                                          |                                       |            |             |                                                                                                              |                              |                             |        |
| Baking powder                                | 264   |                                                                        |                         |                                                                               |                                                                          |                                       |            |             |                                                                                                              |                              |                             |        |
| Raisins                                      | 318   |                                                                        |                         |                                                                               |                                                                          |                                       |            |             |                                                                                                              |                              |                             |        |
| Chui jhaal                                   | 323   |                                                                        |                         |                                                                               |                                                                          |                                       |            |             |                                                                                                              |                              |                             |        |
| Other                                        | 910   |                                                                        |                         |                                                                               |                                                                          |                                       |            |             |                                                                                                              |                              |                             |        |
| <b>Other food</b>                            |       |                                                                        |                         |                                                                               |                                                                          |                                       |            |             |                                                                                                              |                              |                             |        |
| Sugar                                        | 266   |                                                                        |                         |                                                                               |                                                                          |                                       |            |             |                                                                                                              |                              |                             |        |
| Gur                                          | 267   |                                                                        |                         |                                                                               |                                                                          |                                       |            |             |                                                                                                              |                              |                             |        |
| Misri/tal misri                              | 268   |                                                                        |                         |                                                                               |                                                                          |                                       |            |             |                                                                                                              |                              |                             |        |
| Tea leaves                                   | 269   |                                                                        |                         |                                                                               |                                                                          |                                       |            |             |                                                                                                              |                              |                             |        |
| Badam (ground nut)                           | 270   |                                                                        |                         |                                                                               |                                                                          |                                       |            |             |                                                                                                              |                              |                             |        |
| Honey                                        | 271   |                                                                        |                         |                                                                               |                                                                          |                                       |            |             |                                                                                                              |                              |                             |        |
| <b>Drinks and beverages</b>                  |       |                                                                        |                         |                                                                               |                                                                          |                                       |            |             |                                                                                                              |                              |                             |        |
| Tea –prepared                                | 272   |                                                                        |                         |                                                                               |                                                                          |                                       |            |             |                                                                                                              |                              |                             |        |
| Coke/ Seven-up<br>etc./Pepsi/RC/Urocola etc. | 273   |                                                                        |                         |                                                                               |                                                                          |                                       |            |             |                                                                                                              |                              |                             |        |
| Packaged Juice                               | 274   |                                                                        |                         |                                                                               |                                                                          |                                       |            |             |                                                                                                              |                              |                             |        |
| Horlicks/Bournvita/Tang                      | 275   |                                                                        |                         |                                                                               |                                                                          |                                       |            |             |                                                                                                              |                              |                             |        |
| Sugarcane/palm/date juice                    | 276   |                                                                        |                         |                                                                               |                                                                          |                                       |            |             |                                                                                                              |                              |                             |        |
| <b>Other foods prepared outside home</b>     |       |                                                                        |                         |                                                                               |                                                                          |                                       |            |             |                                                                                                              |                              |                             |        |
| Rice/Jao                                     | 277   |                                                                        |                         |                                                                               |                                                                          |                                       |            |             |                                                                                                              |                              |                             |        |
| Panta Bhaat                                  | 278   |                                                                        |                         |                                                                               |                                                                          |                                       |            |             |                                                                                                              |                              |                             |        |
| Khichuri                                     | 279   |                                                                        |                         |                                                                               |                                                                          |                                       |            |             |                                                                                                              |                              |                             |        |
| Polao/Biryani/Tehari                         | 280   |                                                                        |                         |                                                                               |                                                                          |                                       |            |             |                                                                                                              |                              |                             |        |
| Ruti/Parota                                  | 281   |                                                                        |                         |                                                                               |                                                                          |                                       |            |             |                                                                                                              |                              |                             |        |
| Bonroti/paoroti                              | 282   |                                                                        |                         |                                                                               |                                                                          |                                       |            |             |                                                                                                              |                              |                             |        |
| Burger                                       | 283   |                                                                        |                         |                                                                               |                                                                          |                                       |            |             |                                                                                                              |                              |                             |        |

Household Number:

| Name of the item                           | Code | Did your household consume it in the last 7 days<br>Yes...1<br>No....2 | Total quantity consumed | Unit of measure?<br>Kg..... 1<br>Grams..... 2<br>Liter..... 3<br>Number.... 4 | If the unit of measure is number, then write the average weight in grams | Quantity consumed from purchased food |            |             |                                                                                                              | Quantity from own production | Quantity from other sources |        |
|--------------------------------------------|------|------------------------------------------------------------------------|-------------------------|-------------------------------------------------------------------------------|--------------------------------------------------------------------------|---------------------------------------|------------|-------------|--------------------------------------------------------------------------------------------------------------|------------------------------|-----------------------------|--------|
|                                            |      |                                                                        |                         |                                                                               |                                                                          | Quantity consumed                     | Unit price | Total value | Did you purchase on credit?<br>(note: if more than half bought on credit, write 'yes')<br>Yes...1<br>No....2 |                              | Quantity                    | Source |
|                                            |      |                                                                        |                         |                                                                               |                                                                          | (Tk)                                  |            |             |                                                                                                              |                              | [Code1]                     |        |
|                                            |      |                                                                        |                         |                                                                               |                                                                          | O1_06                                 | O1_07      | O1_08       | O1_09                                                                                                        | O1_10                        | O1_11                       | O1_12  |
| Paes/firni/cooked firni                    | 284  |                                                                        |                         |                                                                               |                                                                          |                                       |            |             |                                                                                                              |                              |                             |        |
| Pitha                                      | 285  |                                                                        |                         |                                                                               |                                                                          |                                       |            |             |                                                                                                              |                              |                             |        |
| Halua                                      | 286  |                                                                        |                         |                                                                               |                                                                          |                                       |            |             |                                                                                                              |                              |                             |        |
| Bharta                                     | 287  |                                                                        |                         |                                                                               |                                                                          |                                       |            |             |                                                                                                              |                              |                             |        |
| Bhaji                                      | 288  |                                                                        |                         |                                                                               |                                                                          |                                       |            |             |                                                                                                              |                              |                             |        |
| Jhol curry                                 | 289  |                                                                        |                         |                                                                               |                                                                          |                                       |            |             |                                                                                                              |                              |                             |        |
| Bhuna curry                                | 290  |                                                                        |                         |                                                                               |                                                                          |                                       |            |             |                                                                                                              |                              |                             |        |
| Daal                                       | 291  |                                                                        |                         |                                                                               |                                                                          |                                       |            |             |                                                                                                              |                              |                             |        |
| Salad                                      | 292  |                                                                        |                         |                                                                               |                                                                          |                                       |            |             |                                                                                                              |                              |                             |        |
| Sweets                                     | 293  |                                                                        |                         |                                                                               |                                                                          |                                       |            |             |                                                                                                              |                              |                             |        |
| Curd                                       | 294  |                                                                        |                         |                                                                               |                                                                          |                                       |            |             |                                                                                                              |                              |                             |        |
| Alur chap                                  | 295  |                                                                        |                         |                                                                               |                                                                          |                                       |            |             |                                                                                                              |                              |                             |        |
| Singara                                    | 296  |                                                                        |                         |                                                                               |                                                                          |                                       |            |             |                                                                                                              |                              |                             |        |
| Puri                                       | 297  |                                                                        |                         |                                                                               |                                                                          |                                       |            |             |                                                                                                              |                              |                             |        |
| Piaju                                      | 298  |                                                                        |                         |                                                                               |                                                                          |                                       |            |             |                                                                                                              |                              |                             |        |
| Chhola/ghugni/boot                         | 299  |                                                                        |                         |                                                                               |                                                                          |                                       |            |             |                                                                                                              |                              |                             |        |
| Achar/Chatni                               | 300  |                                                                        |                         |                                                                               |                                                                          |                                       |            |             |                                                                                                              |                              |                             |        |
| Chotpoti                                   | 301  |                                                                        |                         |                                                                               |                                                                          |                                       |            |             |                                                                                                              |                              |                             |        |
| Chanachur                                  | 302  |                                                                        |                         |                                                                               |                                                                          |                                       |            |             |                                                                                                              |                              |                             |        |
| Mowa (Puffed rice ball coated in molasses) | 323  |                                                                        |                         |                                                                               |                                                                          |                                       |            |             |                                                                                                              |                              |                             |        |
| Biscuit                                    | 303  |                                                                        |                         |                                                                               |                                                                          |                                       |            |             |                                                                                                              |                              |                             |        |
| Cake                                       | 304  |                                                                        |                         |                                                                               |                                                                          |                                       |            |             |                                                                                                              |                              |                             |        |
| Patties                                    | 305  |                                                                        |                         |                                                                               |                                                                          |                                       |            |             |                                                                                                              |                              |                             |        |
| Chips                                      | 306  |                                                                        |                         |                                                                               |                                                                          |                                       |            |             |                                                                                                              |                              |                             |        |
| Chocolate                                  | 307  |                                                                        |                         |                                                                               |                                                                          |                                       |            |             |                                                                                                              |                              |                             |        |
| Chewing gum                                | 308  |                                                                        |                         |                                                                               |                                                                          |                                       |            |             |                                                                                                              |                              |                             |        |
| Gaja                                       | 309  |                                                                        |                         |                                                                               |                                                                          |                                       |            |             |                                                                                                              |                              |                             |        |
| Murali                                     | 310  |                                                                        |                         |                                                                               |                                                                          |                                       |            |             |                                                                                                              |                              |                             |        |
| Nimki                                      | 311  |                                                                        |                         |                                                                               |                                                                          |                                       |            |             |                                                                                                              |                              |                             |        |
| Any fried food                             | 312  |                                                                        |                         |                                                                               |                                                                          |                                       |            |             |                                                                                                              |                              |                             |        |
| Any boiled food                            | 313  |                                                                        |                         |                                                                               |                                                                          |                                       |            |             |                                                                                                              |                              |                             |        |
| Tobacco                                    | 314  |                                                                        |                         |                                                                               |                                                                          |                                       |            |             |                                                                                                              |                              |                             |        |
| Betel Leaf                                 | 315  |                                                                        |                         |                                                                               |                                                                          |                                       |            |             |                                                                                                              |                              |                             |        |
| Supari                                     | 316  |                                                                        |                         |                                                                               |                                                                          |                                       |            |             |                                                                                                              |                              |                             |        |
| Taalr shaash                               | 320  |                                                                        |                         |                                                                               |                                                                          |                                       |            |             |                                                                                                              |                              |                             |        |
| Ice Cream                                  | 321  |                                                                        |                         |                                                                               |                                                                          |                                       |            |             |                                                                                                              |                              |                             |        |

Household Number:

| Sl no | Question                                           | Response             | Response Code                                                                                                                                                                                    |
|-------|----------------------------------------------------|----------------------|--------------------------------------------------------------------------------------------------------------------------------------------------------------------------------------------------|
| O1_13 | Where did you buy most of the food items from?     | <input type="text"/> | From farm/home..... 1<br>Village market (within own village)..... 2<br>Village market (outside own village)..... 3<br>City market..... 4<br>Others (please specify) ..... 5<br>School gate.....6 |
| O1_14 | Who purchases most of the food for this household? | <input type="text"/> | Member ID                                                                                                                                                                                        |

| Code 1: Quantity from other sources |                          |
|-------------------------------------|--------------------------|
| Loan from friend/relative ..... 1   | Government program.....5 |
| Gift from friend/relative ..... 2   | NGO program.....6        |
| Wages ..... 3                       | Begged.....7             |
| Collected ..... 4                   | Hunted/Fished ..... 8    |
|                                     | Not applicable..... 9    |

Module End Time: Hour   Minute

Household Number:

**Module O2: Household Food Inventory on the Day of Survey (Female)**

(As observed and weighed by enumerator)

Module start time: Hour   Minu

Respondent ID:  Consent :  Yes ...1  
No.....2

| Item        | Item Code | Quantity | Unit                                   |
|-------------|-----------|----------|----------------------------------------|
|             |           |          | Kg.....1<br>Gram .....2<br>Liter.....3 |
|             |           |          | Code ↑                                 |
| O2_01       | O2_02     | O2_03    | O2_04                                  |
| Paddy       | 1         |          |                                        |
| Rice        | 2         |          |                                        |
| Atta        | 3         |          |                                        |
| Cooking Oil | 4         |          |                                        |
| Pulses      | 5         |          |                                        |

Module End Time: Hour   Minute

**Module O3: Food Consumption from Purchases, Home Production and Other Sources: Recall Period 7 Days (Female)**

Module start time: Hour   Minu

Respondent ID:  Consent :  Yes ...1  
No.....2

| Member              | Code  | The number of members who consumed everyday |                         |                         |                         |                         |                         |                         |
|---------------------|-------|---------------------------------------------|-------------------------|-------------------------|-------------------------|-------------------------|-------------------------|-------------------------|
|                     |       | Day 1<br>(yesterday)                        | Day 2<br>(previous day) | Day 3<br>(previous day) | Day 4<br>(previous day) | Day 5<br>(previous day) | Day 6<br>(previous day) | Day 7<br>(previous day) |
|                     | O3_01 | O3_02                                       | O3_03                   | O3_04                   | O3_05                   | O3_06                   | O3_07                   | O3_08                   |
| <10 year old male   | 1     |                                             |                         |                         |                         |                         |                         |                         |
| <10 year old female | 2     |                                             |                         |                         |                         |                         |                         |                         |
| >10 year old male   | 3     |                                             |                         |                         |                         |                         |                         |                         |
| >10 year old female | 4     |                                             |                         |                         |                         |                         |                         |                         |

Module End Time: Hour   Minute

Household Number:

**Module P: Non-food Expenditure (Male)**

Module Start Time: Hour   Minute

Respondant ID:  Respondant's Consent:

Yes ..... 1  
No ..... 2

**Module P1: Non-food Expenditure Monthly Recall (Male)**

| Item Name                                                                       | Expenses Code | Cash expenditure (including debt) | Where do you buy most of the items from?<br>From farm/home..... 1<br>Village market (within own village).... 2<br>Village market (outside own village) ... 3<br>City market..... 4<br>Others (please specify) ..... 5 | If not purchased |                                                                                                              |
|---------------------------------------------------------------------------------|---------------|-----------------------------------|-----------------------------------------------------------------------------------------------------------------------------------------------------------------------------------------------------------------------|------------------|--------------------------------------------------------------------------------------------------------------|
|                                                                                 |               |                                   |                                                                                                                                                                                                                       | Value            | Source:<br>Friend/neighbors /relatives 1<br>Own craftsmanship or stock 2<br>Collected .....3<br>Other .....4 |
|                                                                                 |               | (Tk)                              |                                                                                                                                                                                                                       | (Tk)             | Code ↑                                                                                                       |
|                                                                                 | <b>P1_01</b>  | <b>P1_02</b>                      | <b>P1_03</b>                                                                                                                                                                                                          | <b>P1_04</b>     | <b>P1_05</b>                                                                                                 |
| <b>FUEL AND LIGHTING</b>                                                        |               |                                   |                                                                                                                                                                                                                       |                  |                                                                                                              |
| Firewood                                                                        | 1             |                                   |                                                                                                                                                                                                                       |                  |                                                                                                              |
| Cow dung/cakes/bhushi/wood-powder                                               | 2             |                                   |                                                                                                                                                                                                                       |                  |                                                                                                              |
| Jute stick                                                                      | 3             |                                   |                                                                                                                                                                                                                       |                  |                                                                                                              |
| Kerosene                                                                        | 4             |                                   |                                                                                                                                                                                                                       |                  |                                                                                                              |
| Agri by products fuel: paddy, hag, pressed sugarcane and dried com plants, etc. | 5             |                                   |                                                                                                                                                                                                                       |                  |                                                                                                              |
| Gas (natural, bio-gas)/LPG                                                      | 6             |                                   |                                                                                                                                                                                                                       |                  |                                                                                                              |
| Electricity (national grid)                                                     | 7             |                                   |                                                                                                                                                                                                                       |                  |                                                                                                              |
| Electricity (generator)                                                         | 46            |                                   |                                                                                                                                                                                                                       |                  |                                                                                                              |
| Electricity (Solar)                                                             | 47            |                                   |                                                                                                                                                                                                                       |                  |                                                                                                              |
| Pit coal, char coal, wood coal                                                  | 8             |                                   |                                                                                                                                                                                                                       |                  |                                                                                                              |
| Other fuels and light (e.g. matches and candles etc.)                           | 9             |                                   |                                                                                                                                                                                                                       |                  |                                                                                                              |
| <b>COSMETICS AND OTHER EXPENSES</b>                                             |               |                                   |                                                                                                                                                                                                                       |                  |                                                                                                              |
| Snow, cream, powder                                                             | 10            |                                   |                                                                                                                                                                                                                       |                  |                                                                                                              |
| Perfume etc.                                                                    | 11            |                                   |                                                                                                                                                                                                                       |                  |                                                                                                              |
| Hair cutting, styling, shaving, etc.                                            | 12            |                                   |                                                                                                                                                                                                                       |                  |                                                                                                              |
| Hair oil, hair cream, combs, clips, etc.                                        | 13            |                                   |                                                                                                                                                                                                                       |                  |                                                                                                              |
| Razor, razor blades, shaving cream and lotions, etc.                            | 14            |                                   |                                                                                                                                                                                                                       |                  |                                                                                                              |
| Lipstick, nail-polish, etc.                                                     | 15            |                                   |                                                                                                                                                                                                                       |                  |                                                                                                              |

Household Number:    

| Item Name                                           | Expenses Code | Cash expenditure<br>(including debt) | Where do you buy most of the items from?<br>From farm/home..... 1<br>Village market (within own village)..... 2<br>Village market (outside own village) ... 3<br>City market..... 4<br>Others (please specify) ..... 5 | If not purchased |                                                                                                              |
|-----------------------------------------------------|---------------|--------------------------------------|------------------------------------------------------------------------------------------------------------------------------------------------------------------------------------------------------------------------|------------------|--------------------------------------------------------------------------------------------------------------|
|                                                     |               |                                      |                                                                                                                                                                                                                        | Value            | Source:<br>Friend/neighbors /relatives 1<br>Own craftsmanship or stock 2<br>Collected .....3<br>Other .....4 |
|                                                     |               | (Tk)                                 |                                                                                                                                                                                                                        | (Tk)             | Code ↑                                                                                                       |
|                                                     | <b>P1_01</b>  | <b>P1_02</b>                         | <b>P1_03</b>                                                                                                                                                                                                           | <b>P1_04</b>     | <b>P1_05</b>                                                                                                 |
| Beautifying items (hair ribbon, churi, kajal, etc.) | 16            |                                      |                                                                                                                                                                                                                        |                  |                                                                                                              |
| <b>WASHING AND CLEANING EXPENSES</b>                |               |                                      |                                                                                                                                                                                                                        |                  |                                                                                                              |
| Bath soap, shampoo, toothpaste, etc.                | 17            |                                      |                                                                                                                                                                                                                        |                  |                                                                                                              |
| Washing soap, powder for cloths                     | 18            |                                      |                                                                                                                                                                                                                        |                  |                                                                                                              |
| Washing/ laundry expenses                           | 19            |                                      |                                                                                                                                                                                                                        |                  |                                                                                                              |
| Bleaching powder, soda etc.                         | 20            |                                      |                                                                                                                                                                                                                        |                  |                                                                                                              |
| Vim/ dish cleaning supplies                         | 21            |                                      |                                                                                                                                                                                                                        |                  |                                                                                                              |
| Finis/ phenyl/ other household cleaning supplies    | 22            |                                      |                                                                                                                                                                                                                        |                  |                                                                                                              |
| Toilet papers                                       | 23            |                                      |                                                                                                                                                                                                                        |                  |                                                                                                              |
| Mosquito coil                                       | 24            |                                      |                                                                                                                                                                                                                        |                  |                                                                                                              |
| Mosquito spray                                      | 25            |                                      |                                                                                                                                                                                                                        |                  |                                                                                                              |
| Women's sanitary napkin                             | 48            |                                      |                                                                                                                                                                                                                        |                  |                                                                                                              |
| Diaper for baby                                     | 49            |                                      |                                                                                                                                                                                                                        |                  |                                                                                                              |
| <b>TRANSPORT/ TRAVEL AND OTHER MISC. CHARGES</b>    |               |                                      |                                                                                                                                                                                                                        |                  |                                                                                                              |
| Bus fare                                            | 26            |                                      |                                                                                                                                                                                                                        |                  |                                                                                                              |
| Rickshaw/ van fare                                  | 27            |                                      |                                                                                                                                                                                                                        |                  |                                                                                                              |
| Taxi/ tempoo/ mishuk fare                           | 28            |                                      |                                                                                                                                                                                                                        |                  |                                                                                                              |
| Boat/ launch fare                                   | 29            |                                      |                                                                                                                                                                                                                        |                  |                                                                                                              |
| Train fare                                          | 30            |                                      |                                                                                                                                                                                                                        |                  |                                                                                                              |
| Other transport fare (specify)                      | 31            |                                      |                                                                                                                                                                                                                        |                  |                                                                                                              |
| Bicycle maintenance, tyres, tubes repairs etc.      | 32            |                                      |                                                                                                                                                                                                                        |                  |                                                                                                              |
| Motor-cycle maintenance, repairs, etc.              | 33            |                                      |                                                                                                                                                                                                                        |                  |                                                                                                              |
| Car maintenance, repairs, etc.                      | 34            |                                      |                                                                                                                                                                                                                        |                  |                                                                                                              |



Household Number:

| Item Name                                                                   | Expenses Code | Cash expenditure<br>(including debt) | Where do you buy most of the items from?<br>From farm/home..... 1<br>Village market (within own village).... 2<br>Village market (outside own village) ... 3<br>City market..... 4<br>Others (please specify) ..... 5 | If not purchased |                                                                                                              |
|-----------------------------------------------------------------------------|---------------|--------------------------------------|-----------------------------------------------------------------------------------------------------------------------------------------------------------------------------------------------------------------------|------------------|--------------------------------------------------------------------------------------------------------------|
|                                                                             |               |                                      |                                                                                                                                                                                                                       | Value            | Source:<br>Friend/neighbors /relatives 1<br>Own craftsmanship or stock 2<br>Collected .....3<br>Other .....4 |
|                                                                             |               | (Tk)                                 |                                                                                                                                                                                                                       | (Tk)             | Code ↑                                                                                                       |
|                                                                             | <b>P1_01</b>  | <b>P1_02</b>                         | <b>P1_03</b>                                                                                                                                                                                                          | <b>P1_04</b>     | <b>P1_05</b>                                                                                                 |
| Boat maintenance, repairs, etc.                                             | 35            |                                      |                                                                                                                                                                                                                       |                  |                                                                                                              |
| Petrol                                                                      | 36            |                                      |                                                                                                                                                                                                                       |                  |                                                                                                              |
| Diesel                                                                      | 37            |                                      |                                                                                                                                                                                                                       |                  |                                                                                                              |
| Motor oil/CNG etc.                                                          | 38            |                                      |                                                                                                                                                                                                                       |                  |                                                                                                              |
| Other transport, repair and maintenance.                                    | 39            |                                      |                                                                                                                                                                                                                       |                  |                                                                                                              |
| Telephone bill/ charges/mobile                                              | 40            |                                      |                                                                                                                                                                                                                       |                  |                                                                                                              |
| Telegram, postal and courier service expenses, etc.                         | 41            |                                      |                                                                                                                                                                                                                       |                  |                                                                                                              |
| Salaries and wages of servants                                              | 42            |                                      |                                                                                                                                                                                                                       |                  |                                                                                                              |
| Salaries and wages of drivers                                               | 43            |                                      |                                                                                                                                                                                                                       |                  |                                                                                                              |
| Salaries and wages of others including guards, gardeners, housekeepers etc. | 44            |                                      |                                                                                                                                                                                                                       |                  |                                                                                                              |
| Other contingencies expenses (specify)                                      | 45            |                                      |                                                                                                                                                                                                                       |                  |                                                                                                              |

Household Number:

**Module P2: Non-food Expenditure Annual Recall (Male)**

| Item Name                                          | Expenses Code | If purchased          |                                   |                                                                                                                                                                                                                       | If not purchased                                  |              |                                                                                                                                |
|----------------------------------------------------|---------------|-----------------------|-----------------------------------|-----------------------------------------------------------------------------------------------------------------------------------------------------------------------------------------------------------------------|---------------------------------------------------|--------------|--------------------------------------------------------------------------------------------------------------------------------|
|                                                    |               | How many did you buy? | Cash expenditure (including debt) | Where do you buy most of the items from?<br>From farm/home..... 1<br>Village market (within own village) ... 2<br>Village market (outside own village) ... 3<br>City market..... 4<br>Others (please specify) ..... 5 | How many did you produce at home/receive as gift? | Value        | Source:<br>Friends/Relatives/Neighbors/others... 1<br>own craftsmanship or stock ..... 2<br>Collected ..... 3<br>Others..... 4 |
|                                                    |               | (Number)              | (Tk)                              |                                                                                                                                                                                                                       | (Number)                                          | (Tk)         | Code                                                                                                                           |
|                                                    | <b>P2_01</b>  | <b>P2_02</b>          | <b>P2_03</b>                      | <b>P2_04</b>                                                                                                                                                                                                          | <b>P2_05</b>                                      | <b>P2_06</b> | <b>P2_07</b>                                                                                                                   |
| <b>For adult:</b>                                  |               |                       |                                   |                                                                                                                                                                                                                       |                                                   |              |                                                                                                                                |
| Lungi/dhuti                                        | 51            |                       |                                   |                                                                                                                                                                                                                       |                                                   |              |                                                                                                                                |
| Shirts                                             | 52            |                       |                                   |                                                                                                                                                                                                                       |                                                   |              |                                                                                                                                |
| Pant                                               | 53            |                       |                                   |                                                                                                                                                                                                                       |                                                   |              |                                                                                                                                |
| Saree                                              | 54            |                       |                                   |                                                                                                                                                                                                                       |                                                   |              |                                                                                                                                |
| Blouse/ petticoat                                  | 55            |                       |                                   |                                                                                                                                                                                                                       |                                                   |              |                                                                                                                                |
| Salwar kameez/ Orna                                | 56            |                       |                                   |                                                                                                                                                                                                                       |                                                   |              |                                                                                                                                |
| Punjabi/ Pajamas                                   | 57            |                       |                                   |                                                                                                                                                                                                                       |                                                   |              |                                                                                                                                |
| Suit, overcoat, ashkan, etc.                       | 58            |                       |                                   |                                                                                                                                                                                                                       |                                                   |              |                                                                                                                                |
| Sweaters, Jacket, pullovers, mufflers, etc.        | 59            |                       |                                   |                                                                                                                                                                                                                       |                                                   |              |                                                                                                                                |
| Underwear etc.                                     | 60            |                       |                                   |                                                                                                                                                                                                                       |                                                   |              |                                                                                                                                |
| Socks, handkerchiefs, scarves, caps, neckties etc. | 61            |                       |                                   |                                                                                                                                                                                                                       |                                                   |              |                                                                                                                                |
| Other (specify)                                    | 62            |                       |                                   |                                                                                                                                                                                                                       |                                                   |              |                                                                                                                                |
| <b>For children:</b>                               |               |                       |                                   |                                                                                                                                                                                                                       |                                                   |              |                                                                                                                                |
| Lungi/dhuti                                        | 63            |                       |                                   |                                                                                                                                                                                                                       |                                                   |              |                                                                                                                                |
| Full pant                                          | 64            |                       |                                   |                                                                                                                                                                                                                       |                                                   |              |                                                                                                                                |
| Half pant                                          | 65            |                       |                                   |                                                                                                                                                                                                                       |                                                   |              |                                                                                                                                |
| Shirts                                             | 66            |                       |                                   |                                                                                                                                                                                                                       |                                                   |              |                                                                                                                                |
| T-shirt                                            | 67            |                       |                                   |                                                                                                                                                                                                                       |                                                   |              |                                                                                                                                |
| Frocks, dresses, babysuit etc.                     | 68            |                       |                                   |                                                                                                                                                                                                                       |                                                   |              |                                                                                                                                |
| Socks, handkerchiefs, scarves, caps, neckties etc. | 69            |                       |                                   |                                                                                                                                                                                                                       |                                                   |              |                                                                                                                                |
| Sweaters, Jacket, pullovers, mufflers, etc.        | 70            |                       |                                   |                                                                                                                                                                                                                       |                                                   |              |                                                                                                                                |
| Other for children (specify)                       | 71            |                       |                                   |                                                                                                                                                                                                                       |                                                   |              |                                                                                                                                |
| <b>Both</b>                                        |               |                       |                                   |                                                                                                                                                                                                                       |                                                   |              |                                                                                                                                |

Household Number:    

| Item Name                                    | Expenses Code | If purchased          |                                   |                                                                                                                                                                                                                       | If not purchased                                  |              |                                                                                                                                |
|----------------------------------------------|---------------|-----------------------|-----------------------------------|-----------------------------------------------------------------------------------------------------------------------------------------------------------------------------------------------------------------------|---------------------------------------------------|--------------|--------------------------------------------------------------------------------------------------------------------------------|
|                                              |               | How many did you buy? | Cash expenditure (including debt) | Where do you buy most of the items from?<br>From farm/home..... 1<br>Village market (within own village) ... 2<br>Village market (outside own village) ... 3<br>City market..... 4<br>Others (please specify) ..... 5 | How many did you produce at home/receive as gift? | Value        | Source:<br>Friends/Relatives/Neighbors/others... 1<br>own craftsmanship or stock ..... 2<br>Collected ..... 3<br>Others..... 4 |
|                                              |               | (Number)              | (Tk)                              |                                                                                                                                                                                                                       | (Number)                                          | (Tk)         | Code                                                                                                                           |
|                                              | <b>P2_01</b>  | <b>P2_02</b>          | <b>P2_03</b>                      | <b>P2_04</b>                                                                                                                                                                                                          | <b>P2_05</b>                                      | <b>P2_06</b> | <b>P2_07</b>                                                                                                                   |
| Towel, Gamcha                                | 72            |                       |                                   |                                                                                                                                                                                                                       |                                                   |              |                                                                                                                                |
| Chador, shawl, etc.                          | 73            |                       |                                   |                                                                                                                                                                                                                       |                                                   |              |                                                                                                                                |
| Other (specify)                              | 74            |                       |                                   |                                                                                                                                                                                                                       |                                                   |              |                                                                                                                                |
| Clothing material and tailoring              |               |                       |                                   |                                                                                                                                                                                                                       |                                                   |              |                                                                                                                                |
| Clothing material and tailoring              | 75            |                       |                                   |                                                                                                                                                                                                                       |                                                   |              |                                                                                                                                |
| Mill-made cloth/ fabric                      | 76            |                       |                                   |                                                                                                                                                                                                                       |                                                   |              |                                                                                                                                |
| Hand loom cloth/ fabric                      | 77            |                       |                                   |                                                                                                                                                                                                                       |                                                   |              |                                                                                                                                |
| Drill and other cloth for trousers           | 78            |                       |                                   |                                                                                                                                                                                                                       |                                                   |              |                                                                                                                                |
| Woolen cloth                                 | 79            |                       |                                   |                                                                                                                                                                                                                       |                                                   |              |                                                                                                                                |
| Silk                                         | 80            |                       |                                   |                                                                                                                                                                                                                       |                                                   |              |                                                                                                                                |
| Artificial silk etc.                         | 81            |                       |                                   |                                                                                                                                                                                                                       |                                                   |              |                                                                                                                                |
| Other artificial-yarn made cloths            | 82            |                       |                                   |                                                                                                                                                                                                                       |                                                   |              |                                                                                                                                |
| Tailoring expenses                           | 83            |                       |                                   |                                                                                                                                                                                                                       |                                                   |              |                                                                                                                                |
| Other clothing related expenses              | 84            |                       |                                   |                                                                                                                                                                                                                       |                                                   |              |                                                                                                                                |
| Footwear                                     |               |                       |                                   |                                                                                                                                                                                                                       |                                                   |              |                                                                                                                                |
| Leather shoes                                | 85            |                       |                                   |                                                                                                                                                                                                                       |                                                   |              |                                                                                                                                |
| Leather sandal-shoes                         | 86            |                       |                                   |                                                                                                                                                                                                                       |                                                   |              |                                                                                                                                |
| Leather sandal                               | 87            |                       |                                   |                                                                                                                                                                                                                       |                                                   |              |                                                                                                                                |
| Plastic shoes                                | 88            |                       |                                   |                                                                                                                                                                                                                       |                                                   |              |                                                                                                                                |
| Plastic sandal-shoes                         | 89            |                       |                                   |                                                                                                                                                                                                                       |                                                   |              |                                                                                                                                |
| Other sandal                                 | 90            |                       |                                   |                                                                                                                                                                                                                       |                                                   |              |                                                                                                                                |
| Canvas shoes, sports shoes, etc.             | 91            |                       |                                   |                                                                                                                                                                                                                       |                                                   |              |                                                                                                                                |
| Wooden sandals                               | 92            |                       |                                   |                                                                                                                                                                                                                       |                                                   |              |                                                                                                                                |
| Shoe brush, polish, cleaning supplies, etc.  | 93            |                       |                                   |                                                                                                                                                                                                                       |                                                   |              |                                                                                                                                |
| Maintenance and repair expenses of foot wear | 94            |                       |                                   |                                                                                                                                                                                                                       |                                                   |              |                                                                                                                                |
| Other expenses regarding footwear            | 95            |                       |                                   |                                                                                                                                                                                                                       |                                                   |              |                                                                                                                                |
| Household-use textiles, etc.                 |               |                       |                                   |                                                                                                                                                                                                                       |                                                   |              |                                                                                                                                |

Household Number:

| Item Name                                  | Expenses Code | If purchased          |                                   |                                                                                                                                                                                                                       | If not purchased                                  |              |                                                                                                                                |
|--------------------------------------------|---------------|-----------------------|-----------------------------------|-----------------------------------------------------------------------------------------------------------------------------------------------------------------------------------------------------------------------|---------------------------------------------------|--------------|--------------------------------------------------------------------------------------------------------------------------------|
|                                            |               | How many did you buy? | Cash expenditure (including debt) | Where do you buy most of the items from?<br>From farm/home..... 1<br>Village market (within own village) ... 2<br>Village market (outside own village) ... 3<br>City market..... 4<br>Others (please specify) ..... 5 | How many did you produce at home/receive as gift? | Value        | Source:<br>Friends/Relatives/Neighbors/others... 1<br>own craftsmanship or stock ..... 2<br>Collected ..... 3<br>Others..... 4 |
|                                            |               | (Number)              | (Tk)                              |                                                                                                                                                                                                                       | (Number)                                          | (Tk)         | Code                                                                                                                           |
|                                            | <b>P2_01</b>  | <b>P2_02</b>          | <b>P2_03</b>                      | <b>P2_04</b>                                                                                                                                                                                                          | <b>P2_05</b>                                      | <b>P2_06</b> | <b>P2_07</b>                                                                                                                   |
| Quilt/blanket/Katha                        | 96            |                       |                                   |                                                                                                                                                                                                                       |                                                   |              |                                                                                                                                |
| Toshok                                     | 97            |                       |                                   |                                                                                                                                                                                                                       |                                                   |              |                                                                                                                                |
| Jajim                                      | 98            |                       |                                   |                                                                                                                                                                                                                       |                                                   |              |                                                                                                                                |
| Foam sheet                                 | 99            |                       |                                   |                                                                                                                                                                                                                       |                                                   |              |                                                                                                                                |
| Bed sheets                                 | 100           |                       |                                   |                                                                                                                                                                                                                       |                                                   |              |                                                                                                                                |
| Bed cover                                  | 101           |                       |                                   |                                                                                                                                                                                                                       |                                                   |              |                                                                                                                                |
| Pillows, cushions                          | 102           |                       |                                   |                                                                                                                                                                                                                       |                                                   |              |                                                                                                                                |
| Pillow cover, cushion cover                | 103           |                       |                                   |                                                                                                                                                                                                                       |                                                   |              |                                                                                                                                |
| Table cover                                | 104           |                       |                                   |                                                                                                                                                                                                                       |                                                   |              |                                                                                                                                |
| Curtain                                    | 105           |                       |                                   |                                                                                                                                                                                                                       |                                                   |              |                                                                                                                                |
| Mosquito netting                           | 106           |                       |                                   |                                                                                                                                                                                                                       |                                                   |              |                                                                                                                                |
| Other (specify)                            | 107           |                       |                                   |                                                                                                                                                                                                                       |                                                   |              |                                                                                                                                |
| Housing related expenses                   |               |                       |                                   |                                                                                                                                                                                                                       |                                                   |              |                                                                                                                                |
| House rent (rented house)                  | 108           |                       |                                   |                                                                                                                                                                                                                       |                                                   |              |                                                                                                                                |
| Imputed rent (owner-occupied or other)     | 109           |                       |                                   |                                                                                                                                                                                                                       |                                                   |              |                                                                                                                                |
| Water/ sewerage charges                    | 110           |                       |                                   |                                                                                                                                                                                                                       |                                                   |              |                                                                                                                                |
| Home additions/ improvements               | 111           |                       |                                   |                                                                                                                                                                                                                       |                                                   |              |                                                                                                                                |
| Painting                                   | 112           |                       |                                   |                                                                                                                                                                                                                       |                                                   |              |                                                                                                                                |
| Disaster-related maintenance/ repair       | 113           |                       |                                   |                                                                                                                                                                                                                       |                                                   |              |                                                                                                                                |
| Other routine maintenance/ repair          | 114           |                       |                                   |                                                                                                                                                                                                                       |                                                   |              |                                                                                                                                |
| Municipal tax                              | 115           |                       |                                   |                                                                                                                                                                                                                       |                                                   |              |                                                                                                                                |
| Other related services/ expenses           | 116           |                       |                                   |                                                                                                                                                                                                                       |                                                   |              |                                                                                                                                |
| Medical treatment expenses (male)          |               |                       |                                   |                                                                                                                                                                                                                       |                                                   |              |                                                                                                                                |
| Doctor's fees                              | 117           |                       |                                   |                                                                                                                                                                                                                       |                                                   |              |                                                                                                                                |
| Other practitioner's fees (homeopath etc.) | 118           |                       |                                   |                                                                                                                                                                                                                       |                                                   |              |                                                                                                                                |
| Medicines                                  | 119           |                       |                                   |                                                                                                                                                                                                                       |                                                   |              |                                                                                                                                |

Household Number:

| Item Name                                  | Expenses Code | If purchased          |                                   |                                                                                                                                                                                                                        | If not purchased                                  |              |                                                                                                                                |
|--------------------------------------------|---------------|-----------------------|-----------------------------------|------------------------------------------------------------------------------------------------------------------------------------------------------------------------------------------------------------------------|---------------------------------------------------|--------------|--------------------------------------------------------------------------------------------------------------------------------|
|                                            |               | How many did you buy? | Cash expenditure (including debt) | Where do you buy most of the items from?<br>From farm/home..... 1<br>Village market (within own village) .... 2<br>Village market (outside own village) ... 3<br>City market..... 4<br>Others (please specify) ..... 5 | How many did you produce at home/receive as gift? | Value        | Source:<br>Friends/Relatives/Neighbors/others... 1<br>own craftsmanship or stock ..... 2<br>Collected ..... 3<br>Others..... 4 |
|                                            |               | (Number)              | (Tk)                              |                                                                                                                                                                                                                        | (Number)                                          | (Tk)         | Code                                                                                                                           |
|                                            | <b>P2_01</b>  | <b>P2_02</b>          | <b>P2_03</b>                      | <b>P2_04</b>                                                                                                                                                                                                           | <b>P2_05</b>                                      | <b>P2_06</b> | <b>P2_07</b>                                                                                                                   |
| Ayurvedic/ Kabiraji                        | 120           |                       |                                   |                                                                                                                                                                                                                        |                                                   |              |                                                                                                                                |
| Medical Tests (X-ray, blood, urine etc.)   | 121           |                       |                                   |                                                                                                                                                                                                                        |                                                   |              |                                                                                                                                |
| Hospitalization, clinic charges, etc.      | 122           |                       |                                   |                                                                                                                                                                                                                        |                                                   |              |                                                                                                                                |
| Dental related expenses                    | 123           |                       |                                   |                                                                                                                                                                                                                        |                                                   |              |                                                                                                                                |
| Spectacles                                 | 124           |                       |                                   |                                                                                                                                                                                                                        |                                                   |              |                                                                                                                                |
| Hearing aids                               | 125           |                       |                                   |                                                                                                                                                                                                                        |                                                   |              |                                                                                                                                |
| Crutches                                   | 126           |                       |                                   |                                                                                                                                                                                                                        |                                                   |              |                                                                                                                                |
| Health-related travel/ incidental expenses | 127           |                       |                                   |                                                                                                                                                                                                                        |                                                   |              |                                                                                                                                |
| Medical treatment expenses (female)        |               |                       |                                   |                                                                                                                                                                                                                        |                                                   |              |                                                                                                                                |
| Doctor's fees                              | 128           |                       |                                   |                                                                                                                                                                                                                        |                                                   |              |                                                                                                                                |
| Other practitioner's fees (homeopath etc.) | 129           |                       |                                   |                                                                                                                                                                                                                        |                                                   |              |                                                                                                                                |
| Medicines                                  | 130           |                       |                                   |                                                                                                                                                                                                                        |                                                   |              |                                                                                                                                |
| Ayurvedic/ Kabiraji                        | 131           |                       |                                   |                                                                                                                                                                                                                        |                                                   |              |                                                                                                                                |
| Medical Tests (X-ray, blood, urine etc.)   | 132           |                       |                                   |                                                                                                                                                                                                                        |                                                   |              |                                                                                                                                |
| Hospitalization, clinic charges, etc.      | 133           |                       |                                   |                                                                                                                                                                                                                        |                                                   |              |                                                                                                                                |
| Dental related expenses                    | 134           |                       |                                   |                                                                                                                                                                                                                        |                                                   |              |                                                                                                                                |
| Spectacles                                 | 135           |                       |                                   |                                                                                                                                                                                                                        |                                                   |              |                                                                                                                                |
| Hearing aids                               | 136           |                       |                                   |                                                                                                                                                                                                                        |                                                   |              |                                                                                                                                |
| Crutches                                   | 137           |                       |                                   |                                                                                                                                                                                                                        |                                                   |              |                                                                                                                                |
| Maternity expenses                         | 138           |                       |                                   |                                                                                                                                                                                                                        |                                                   |              |                                                                                                                                |
| Health-related travel/ incidental expenses | 139           |                       |                                   |                                                                                                                                                                                                                        |                                                   |              |                                                                                                                                |
| Educational expenses (male)                |               |                       |                                   |                                                                                                                                                                                                                        |                                                   |              |                                                                                                                                |
| Registration fees                          | 140           |                       |                                   |                                                                                                                                                                                                                        |                                                   |              |                                                                                                                                |
| Examination fees                           | 141           |                       |                                   |                                                                                                                                                                                                                        |                                                   |              |                                                                                                                                |

Household Number:

| Item Name                               | Expenses Code | If purchased          |                                   |                                                                                                                                                                                                                       | If not purchased                                  |              |                                                                                                                                |
|-----------------------------------------|---------------|-----------------------|-----------------------------------|-----------------------------------------------------------------------------------------------------------------------------------------------------------------------------------------------------------------------|---------------------------------------------------|--------------|--------------------------------------------------------------------------------------------------------------------------------|
|                                         |               | How many did you buy? | Cash expenditure (including debt) | Where do you buy most of the items from?<br>From farm/home..... 1<br>Village market (within own village) ... 2<br>Village market (outside own village) ... 3<br>City market..... 4<br>Others (please specify) ..... 5 | How many did you produce at home/receive as gift? | Value        | Source:<br>Friends/Relatives/Neighbors/others... 1<br>own craftsmanship or stock ..... 2<br>Collected ..... 3<br>Others..... 4 |
|                                         |               | (Number)              | (Tk)                              |                                                                                                                                                                                                                       | (Number)                                          | (Tk)         | Code                                                                                                                           |
|                                         | <b>P2_01</b>  | <b>P2_02</b>          | <b>P2_03</b>                      | <b>P2_04</b>                                                                                                                                                                                                          | <b>P2_05</b>                                      | <b>P2_06</b> | <b>P2_07</b>                                                                                                                   |
| Annual fees                             | 142           |                       |                                   |                                                                                                                                                                                                                       |                                                   |              |                                                                                                                                |
| School fees                             | 143           |                       |                                   |                                                                                                                                                                                                                       |                                                   |              |                                                                                                                                |
| Personal Teaching expenses              | 144           |                       |                                   |                                                                                                                                                                                                                       |                                                   |              |                                                                                                                                |
| Text book/ note books/ stationary       | 145           |                       |                                   |                                                                                                                                                                                                                       |                                                   |              |                                                                                                                                |
| Hostel Expenses                         | 146           |                       |                                   |                                                                                                                                                                                                                       |                                                   |              |                                                                                                                                |
| Other                                   | 147           |                       |                                   |                                                                                                                                                                                                                       |                                                   |              |                                                                                                                                |
| Educational expenses (female)           |               |                       |                                   |                                                                                                                                                                                                                       |                                                   |              |                                                                                                                                |
| Registration fees                       | 148           |                       |                                   |                                                                                                                                                                                                                       |                                                   |              |                                                                                                                                |
| Examination fees                        | 149           |                       |                                   |                                                                                                                                                                                                                       |                                                   |              |                                                                                                                                |
| Annual fees                             | 150           |                       |                                   |                                                                                                                                                                                                                       |                                                   |              |                                                                                                                                |
| School fees                             | 151           |                       |                                   |                                                                                                                                                                                                                       |                                                   |              |                                                                                                                                |
| Personal Teaching expenses              | 152           |                       |                                   |                                                                                                                                                                                                                       |                                                   |              |                                                                                                                                |
| Text book/ note books/ stationary       | 153           |                       |                                   |                                                                                                                                                                                                                       |                                                   |              |                                                                                                                                |
| Hostel Expenses                         | 154           |                       |                                   |                                                                                                                                                                                                                       |                                                   |              |                                                                                                                                |
| Other                                   | 155           |                       |                                   |                                                                                                                                                                                                                       |                                                   |              |                                                                                                                                |
| Remittances, ceremonies, gifts, etc.    |               |                       |                                   |                                                                                                                                                                                                                       |                                                   |              |                                                                                                                                |
| Remittances to others living separately | 156           |                       |                                   |                                                                                                                                                                                                                       |                                                   |              |                                                                                                                                |
| Zakat                                   | 157           |                       |                                   |                                                                                                                                                                                                                       |                                                   |              |                                                                                                                                |
| Fitra                                   | 158           |                       |                                   |                                                                                                                                                                                                                       |                                                   |              |                                                                                                                                |
| Donation/ Sadqa                         | 159           |                       |                                   |                                                                                                                                                                                                                       |                                                   |              |                                                                                                                                |
| Qurbani                                 | 160           |                       |                                   |                                                                                                                                                                                                                       |                                                   |              |                                                                                                                                |
| Religious functions (milad etc.)        | 161           |                       |                                   |                                                                                                                                                                                                                       |                                                   |              |                                                                                                                                |
| Expenditure on Hajj                     | 162           |                       |                                   |                                                                                                                                                                                                                       |                                                   |              |                                                                                                                                |
| Expenditure on Pilgrimage               | 163           |                       |                                   |                                                                                                                                                                                                                       |                                                   |              |                                                                                                                                |
| Expenditure on marriage                 | 164           |                       |                                   |                                                                                                                                                                                                                       |                                                   |              |                                                                                                                                |
| Expenditure on births                   | 165           |                       |                                   |                                                                                                                                                                                                                       |                                                   |              |                                                                                                                                |
| Expenditure on deaths                   | 166           |                       |                                   |                                                                                                                                                                                                                       |                                                   |              |                                                                                                                                |
| Other (specific)                        | 167           |                       |                                   |                                                                                                                                                                                                                       |                                                   |              |                                                                                                                                |

Household Number:

| Item Name                                                                   | Expenses Code | If purchased          |                                   |                                                                                                                                                                                                                       | If not purchased                                  |              |                                                                                                                                |
|-----------------------------------------------------------------------------|---------------|-----------------------|-----------------------------------|-----------------------------------------------------------------------------------------------------------------------------------------------------------------------------------------------------------------------|---------------------------------------------------|--------------|--------------------------------------------------------------------------------------------------------------------------------|
|                                                                             |               | How many did you buy? | Cash expenditure (including debt) | Where do you buy most of the items from?<br>From farm/home..... 1<br>Village market (within own village) ... 2<br>Village market (outside own village) ... 3<br>City market..... 4<br>Others (please specify) ..... 5 | How many did you produce at home/receive as gift? | Value        | Source:<br>Friends/Relatives/Neighbors/others... 1<br>own craftsmanship or stock ..... 2<br>Collected ..... 3<br>Others..... 4 |
|                                                                             |               | (Number)              | (Tk)                              |                                                                                                                                                                                                                       | (Number)                                          | (Tk)         | Code                                                                                                                           |
|                                                                             | <b>P2_01</b>  | <b>P2_02</b>          | <b>P2_03</b>                      | <b>P2_04</b>                                                                                                                                                                                                          | <b>P2_05</b>                                      | <b>P2_06</b> | <b>P2_07</b>                                                                                                                   |
| Recreation & leisure, etc.                                                  |               |                       |                                   |                                                                                                                                                                                                                       |                                                   |              |                                                                                                                                |
| Books, newspaper, magazines, story books                                    | 168           |                       |                                   |                                                                                                                                                                                                                       |                                                   |              |                                                                                                                                |
| Cinema                                                                      | 169           |                       |                                   |                                                                                                                                                                                                                       |                                                   |              |                                                                                                                                |
| Theater                                                                     | 170           |                       |                                   |                                                                                                                                                                                                                       |                                                   |              |                                                                                                                                |
| Variety shows, concerts, etc.                                               | 171           |                       |                                   |                                                                                                                                                                                                                       |                                                   |              |                                                                                                                                |
| Sporting expenses, club membership fees, etc.                               | 172           |                       |                                   |                                                                                                                                                                                                                       |                                                   |              |                                                                                                                                |
| Video cassette purchases and rental etc.                                    | 173           |                       |                                   |                                                                                                                                                                                                                       |                                                   |              |                                                                                                                                |
| Audio cassette purchases etc.                                               | 174           |                       |                                   |                                                                                                                                                                                                                       |                                                   |              |                                                                                                                                |
| Photography                                                                 | 175           |                       |                                   |                                                                                                                                                                                                                       |                                                   |              |                                                                                                                                |
| TV/ video/ satellite license fees, etc.                                     | 176           |                       |                                   |                                                                                                                                                                                                                       |                                                   |              |                                                                                                                                |
| Other recreation, marriage day/birthday, tourism & leisure related expenses | 177           |                       |                                   |                                                                                                                                                                                                                       |                                                   |              |                                                                                                                                |
| Taxes, interest, fines, etc.                                                |               |                       |                                   |                                                                                                                                                                                                                       |                                                   |              |                                                                                                                                |
| Income tax                                                                  | 178           |                       |                                   |                                                                                                                                                                                                                       |                                                   |              |                                                                                                                                |
| Bank interest charge, Payment of banking charge                             | 179           |                       |                                   |                                                                                                                                                                                                                       |                                                   |              |                                                                                                                                |
| Fines                                                                       | 180           |                       |                                   |                                                                                                                                                                                                                       |                                                   |              |                                                                                                                                |
| Legal practitioner fees                                                     | 181           |                       |                                   |                                                                                                                                                                                                                       |                                                   |              |                                                                                                                                |
| Other legal expenses                                                        | 182           |                       |                                   |                                                                                                                                                                                                                       |                                                   |              |                                                                                                                                |
| Property registration fees                                                  | 183           |                       |                                   |                                                                                                                                                                                                                       |                                                   |              |                                                                                                                                |
| Other (specify)                                                             | 184           |                       |                                   |                                                                                                                                                                                                                       |                                                   |              |                                                                                                                                |
| Cooking equipment                                                           |               |                       |                                   |                                                                                                                                                                                                                       |                                                   |              |                                                                                                                                |
| Glass/china/clay plates and dishes etc.                                     | 185           |                       |                                   |                                                                                                                                                                                                                       |                                                   |              |                                                                                                                                |
| Refrigerators                                                               | 186           |                       |                                   |                                                                                                                                                                                                                       |                                                   |              |                                                                                                                                |

Household Number:

| Item Name                                    | Expenses Code | If purchased          |                                   |                                                                                                                                                                                                                       | If not purchased                                  |              |                                                                                                                                |
|----------------------------------------------|---------------|-----------------------|-----------------------------------|-----------------------------------------------------------------------------------------------------------------------------------------------------------------------------------------------------------------------|---------------------------------------------------|--------------|--------------------------------------------------------------------------------------------------------------------------------|
|                                              |               | How many did you buy? | Cash expenditure (including debt) | Where do you buy most of the items from?<br>From farm/home..... 1<br>Village market (within own village) ... 2<br>Village market (outside own village) ... 3<br>City market..... 4<br>Others (please specify) ..... 5 | How many did you produce at home/receive as gift? | Value        | Source:<br>Friends/Relatives/Neighbors/others... 1<br>own craftsmanship or stock ..... 2<br>Collected ..... 3<br>Others..... 4 |
|                                              |               | (Number)              | (Tk)                              |                                                                                                                                                                                                                       | (Number)                                          | (Tk)         | Code                                                                                                                           |
|                                              | <b>P2_01</b>  | <b>P2_02</b>          | <b>P2_03</b>                      | <b>P2_04</b>                                                                                                                                                                                                          | <b>P2_05</b>                                      | <b>P2_06</b> | <b>P2_07</b>                                                                                                                   |
| Stove (electric/ gas/ kerosene)              | 187           |                       |                                   |                                                                                                                                                                                                                       |                                                   |              |                                                                                                                                |
| Pots/ pans                                   | 188           |                       |                                   |                                                                                                                                                                                                                       |                                                   |              |                                                                                                                                |
| Other kitchen ware and utensils              | 189           |                       |                                   |                                                                                                                                                                                                                       |                                                   |              |                                                                                                                                |
| spoons/ forks/ knives etc.                   | 190           |                       |                                   |                                                                                                                                                                                                                       |                                                   |              |                                                                                                                                |
| Micro oven/Pressure cooker                   | 191           |                       |                                   |                                                                                                                                                                                                                       |                                                   |              |                                                                                                                                |
| Others                                       | 192           |                       |                                   |                                                                                                                                                                                                                       |                                                   |              |                                                                                                                                |
| Furniture                                    |               |                       |                                   |                                                                                                                                                                                                                       |                                                   |              |                                                                                                                                |
| Bed/Chowki                                   | 193           |                       |                                   |                                                                                                                                                                                                                       |                                                   |              |                                                                                                                                |
| Table/Chair/Dressing Table                   | 194           |                       |                                   |                                                                                                                                                                                                                       |                                                   |              |                                                                                                                                |
| Sofa                                         | 195           |                       |                                   |                                                                                                                                                                                                                       |                                                   |              |                                                                                                                                |
| Wood/Iron<br>Almirah/Wardrobe/Bookshelf      | 196           |                       |                                   |                                                                                                                                                                                                                       |                                                   |              |                                                                                                                                |
| Trunk/Suitcase                               | 197           |                       |                                   |                                                                                                                                                                                                                       |                                                   |              |                                                                                                                                |
| Costs of Furniture<br>Building/Repair/Polish | 198           |                       |                                   |                                                                                                                                                                                                                       |                                                   |              |                                                                                                                                |
| Other furniture related cost                 | 199           |                       |                                   |                                                                                                                                                                                                                       |                                                   |              |                                                                                                                                |
| Personal articles                            |               |                       |                                   |                                                                                                                                                                                                                       |                                                   |              |                                                                                                                                |
| Gold Jewelry                                 | 200           |                       |                                   |                                                                                                                                                                                                                       |                                                   |              |                                                                                                                                |
| Silver Jewelry                               | 201           |                       |                                   |                                                                                                                                                                                                                       |                                                   |              |                                                                                                                                |
| Imitation Jewelry                            | 202           |                       |                                   |                                                                                                                                                                                                                       |                                                   |              |                                                                                                                                |
| Purses/ money bags                           | 203           |                       |                                   |                                                                                                                                                                                                                       |                                                   |              |                                                                                                                                |
| Vanity bags                                  | 204           |                       |                                   |                                                                                                                                                                                                                       |                                                   |              |                                                                                                                                |
| Umbrella, walking stick                      | 205           |                       |                                   |                                                                                                                                                                                                                       |                                                   |              |                                                                                                                                |
| Tie-pin, cigarette cases, lighter etc.       | 206           |                       |                                   |                                                                                                                                                                                                                       |                                                   |              |                                                                                                                                |
| Wrist watch/ clock etc.                      | 207           |                       |                                   |                                                                                                                                                                                                                       |                                                   |              |                                                                                                                                |
| Other personal use items (belts,<br>etc.>)   | 208           |                       |                                   |                                                                                                                                                                                                                       |                                                   |              |                                                                                                                                |
| Misc. Household durable                      |               |                       |                                   |                                                                                                                                                                                                                       |                                                   |              |                                                                                                                                |
| Radio                                        | 210           |                       |                                   |                                                                                                                                                                                                                       |                                                   |              |                                                                                                                                |



Household Number:

| Item Name                                      | Expenses Code | If purchased          |                                   |                                                                                                                                                                                                                        | If not purchased                                  |              |                                                                                                                                |
|------------------------------------------------|---------------|-----------------------|-----------------------------------|------------------------------------------------------------------------------------------------------------------------------------------------------------------------------------------------------------------------|---------------------------------------------------|--------------|--------------------------------------------------------------------------------------------------------------------------------|
|                                                |               | How many did you buy? | Cash expenditure (including debt) | Where do you buy most of the items from?<br>From farm/home..... 1<br>Village market (within own village) .... 2<br>Village market (outside own village) ... 3<br>City market..... 4<br>Others (please specify) ..... 5 | How many did you produce at home/receive as gift? | Value        | Source:<br>Friends/Relatives/Neighbors/others... 1<br>own craftsmanship or stock ..... 2<br>Collected ..... 3<br>Others..... 4 |
|                                                |               | (Number)              | (Tk)                              |                                                                                                                                                                                                                        | (Number)                                          | (Tk)         | Code                                                                                                                           |
|                                                | <b>P2_01</b>  | <b>P2_02</b>          | <b>P2_03</b>                      | <b>P2_04</b>                                                                                                                                                                                                           | <b>P2_05</b>                                      | <b>P2_06</b> | <b>P2_07</b>                                                                                                                   |
| Two-in-one                                     | 211           |                       |                                   |                                                                                                                                                                                                                        |                                                   |              |                                                                                                                                |
| Black & White Television                       | 212           |                       |                                   |                                                                                                                                                                                                                        |                                                   |              |                                                                                                                                |
| Colored Television                             | 213           |                       |                                   |                                                                                                                                                                                                                        |                                                   |              |                                                                                                                                |
| VDO game set                                   | 214           |                       |                                   |                                                                                                                                                                                                                        |                                                   |              |                                                                                                                                |
| VCD/ VCR/dish antenna/cable membership fees    | 215           |                       |                                   |                                                                                                                                                                                                                        |                                                   |              |                                                                                                                                |
| Washing machine, iron, etc.                    | 216           |                       |                                   |                                                                                                                                                                                                                        |                                                   |              |                                                                                                                                |
| Guitar/ orchestra/ harmonium                   | 217           |                       |                                   |                                                                                                                                                                                                                        |                                                   |              |                                                                                                                                |
| Typewriter, personal computer etc.             | 218           |                       |                                   |                                                                                                                                                                                                                        |                                                   |              |                                                                                                                                |
| Lenten/ chimney lamp etc.                      | 219           |                       |                                   |                                                                                                                                                                                                                        |                                                   |              |                                                                                                                                |
| Electric fans, air-conditioners, coolers, etc. | 220           |                       |                                   |                                                                                                                                                                                                                        |                                                   |              |                                                                                                                                |
| Cameras/ camcorders/video camera               | 221           |                       |                                   |                                                                                                                                                                                                                        |                                                   |              |                                                                                                                                |
| Pen drive/flash drive/ memory card             | 222           |                       |                                   |                                                                                                                                                                                                                        |                                                   |              |                                                                                                                                |
| Insurance expenditure                          |               |                       |                                   |                                                                                                                                                                                                                        |                                                   |              |                                                                                                                                |
| Life insurance                                 | 223           |                       |                                   |                                                                                                                                                                                                                        |                                                   |              |                                                                                                                                |
| Health insurance                               | 224           |                       |                                   |                                                                                                                                                                                                                        |                                                   |              |                                                                                                                                |
| General insurance                              | 225           |                       |                                   |                                                                                                                                                                                                                        |                                                   |              |                                                                                                                                |

Module End Time: 

|      |  |  |        |  |  |
|------|--|--|--------|--|--|
| Hour |  |  | Minute |  |  |
|------|--|--|--------|--|--|

Household Number:

**Module Q: Housing (Male)**

Ask of household head or other senior member of household

Module Start Time: Hour   Minute

Respondant ID:  Respondant's Consent:

Yes ..... 1  
No..... 2

| Question number | Question                                                                                                                 | Response             | Response option                                                                                                                                                                                                                                    |
|-----------------|--------------------------------------------------------------------------------------------------------------------------|----------------------|----------------------------------------------------------------------------------------------------------------------------------------------------------------------------------------------------------------------------------------------------|
| Q_01            | Do you own this house, do you use it for free, or do you rent this house?                                                | <input type="text"/> | Owned..... 1<br>Free .....2<br>Rented .....3 (Go to Q03)                                                                                                                                                                                           |
| Q_02            | Estimate the <u>monthly</u> rent you could receive if you rented this dwelling or one exactly like it to another person? | <input type="text"/> | Taka<br>(if don't know.....9999)<br>Next>> move to Q_04                                                                                                                                                                                            |
| Q_03            | How much <u>monthly</u> rent do you pay for this dwelling?                                                               | <input type="text"/> | Taka                                                                                                                                                                                                                                               |
| Q_04            | How many years ago was this house built? How old is it?                                                                  | <input type="text"/> | Years<br>(if don't know.....9999)                                                                                                                                                                                                                  |
| Q_05            | If this household shares space with another household, how many households live in this house?                           | <input type="text"/> | Number<br>(Write "0" if no sharing)                                                                                                                                                                                                                |
| Q_06            | <u>OBSERVE</u><br>What type of dwelling does the household live in?                                                      | <input type="text"/> | No sign of damage ..... 1<br>Slightly damaged .....2<br>Somewhat damaged .....3<br>Very damaged .....4<br>In a very poor state .....5                                                                                                              |
| Q_07            | <u>OBSERVE</u><br><u>The outer walls</u> of the main dwelling of the household are predominantly made of what material?  | <input type="text"/> | Concrete/Brick..... 1<br>Tin/CI Sheet.....2<br>Wood .....3<br>Mud.....4<br>Bamboo.....5<br>Jute straw .....6<br>Plastic /Polythene..... 7<br>Cardboard/paper .....8<br>Golpaata/Palm leaf.....9<br>Grass/Straw..... 10<br>Other (specify) ..... 11 |

Household Number:

| Question number | Question                                                                                                       | Response             | Response option                                                                                                                                                                                                                                   |
|-----------------|----------------------------------------------------------------------------------------------------------------|----------------------|---------------------------------------------------------------------------------------------------------------------------------------------------------------------------------------------------------------------------------------------------|
| Q_08            | <u>OBSERVE</u><br>The <u>roof</u> of the main dwelling is predominantly made of what material?                 | <input type="text"/> | Concrete/Brick..... 1<br>Tin/CI Sheet.....2<br>Wood .....3<br>Mud.....4<br>Bamboo.....5<br>Jute straw .....6<br>Plastic /Polythene.....7<br>Cardboard/paper .....8<br>Golpaata/Palm leaf.....9<br>Grass/Straw..... 10<br>Other (specify) ..... 11 |
| Q_09            | <u>OBSERVE</u><br>The <u>floor</u> of the main dwelling is predominantly made of what material?                | <input type="text"/> | Concrete/Brick..... 1<br>Tin/CI Sheet.....2<br>Wood .....3<br>Mud.....4<br>Bamboo.....5<br>Jute straw .....6<br>Plastic /Polythene.....7<br>Cardboard/paper .....8<br>Golpaata/Palm leaf.....9<br>Grass/Straw..... 10<br>Other (specify) ..... 11 |
| Q_10            | How many rooms does your household occupy?                                                                     | <input type="text"/> | Number<br>(Exclude rooms used for business)                                                                                                                                                                                                       |
| Q_11            | How many rooms are used for sleeping?                                                                          | <input type="text"/> | Number                                                                                                                                                                                                                                            |
| Q_11b           | Is the cooking usually done in the house, in a separate building, or outdoors?                                 | <input type="text"/> | IN THE HOUSE. 1>> <b>Q12</b><br>IN A SEPARATE BUILDING.....2<br>OUTDOORS ..... 3                                                                                                                                                                  |
| Q_11c           | Do you have a separate room which is used as a kitchen?                                                        | <input type="text"/> | YES..... 1<br>NO ..... 2                                                                                                                                                                                                                          |
| Q_12            | <u>OBSERVE</u><br>What is the total floor area of the dwelling in square feet? (measuring tape to be provided) | <input type="text"/> | Square feet                                                                                                                                                                                                                                       |
| Q_13            | Does this household have an electricity connection?                                                            | <input type="text"/> | Yes ..... 1<br>No .....2>> <b>Q16</b>                                                                                                                                                                                                             |

Household Number:

| Question number | Question                                                                      | Response             | Response option                                                                                                                                                                                                     |
|-----------------|-------------------------------------------------------------------------------|----------------------|---------------------------------------------------------------------------------------------------------------------------------------------------------------------------------------------------------------------|
| Q_14            | How often does the electricity supply go off?                                 | <input type="text"/> | Never ..... 1<br>Rarely.....2<br>Less than half the time .....3<br>About half the time .....4<br>More than half.....5<br>Almost always ..... 6                                                                      |
| Q_15            | How much was the electricity cost last month?                                 | <input type="text"/> | Taka                                                                                                                                                                                                                |
| Q_16            | What is your main source of <u>cooking fuel</u> ?                             | <input type="text"/> | Electricity..... 1>>Q18<br>Supply gas.....2<br>LPG.....3<br>Kerosene .....4<br>Firewood .....5<br>Dried cow dung.....6<br>Coal.....7<br>Rice bran/saw dust.....8<br>Dried leaves .....9<br>Other (specify) ..... 10 |
| Q_17            | What was the total cost for cooking fuel in the household in the past month?  | <input type="text"/> | Taka                                                                                                                                                                                                                |
| Q_18            | What is your main source of <u>lighting fuel</u> ?                            | <input type="text"/> | Electricity..... 1>>Q19a<br>Private Generator .....2<br>Solar electricity .....3<br>Kerosene .....4<br>Candles .....5<br>Torch/fire skewer.....6<br>Others.....7                                                    |
| Q_19            | What was the total cost for lighting fuel in the household in the past month? | <input type="text"/> | Taka                                                                                                                                                                                                                |
| Q_19a           | Has the household used biogas for any purpose?                                | <input type="text"/> | Yes, my own plant ..... 1<br>Yes, renting via line ..... 2<br>No ..... 3>>Q20                                                                                                                                       |

Household Number:

| Question number | Question                                                                               | Response                                                                                    | Response option                                                                                                                                                            |
|-----------------|----------------------------------------------------------------------------------------|---------------------------------------------------------------------------------------------|----------------------------------------------------------------------------------------------------------------------------------------------------------------------------|
| Q_19b           | If yes, for what purpose was biogas used?                                              | <input type="text"/>                                                                        | Only for cooking ..... 1<br>Only for lighting ..... 2<br>For both lighting and cooking... 3<br>Business ..... 4<br>Business and for lighting or cooking 5<br>Others..... 6 |
| Q_19c           | If yes, then from which year?                                                          | <input type="text"/>                                                                        | Year                                                                                                                                                                       |
| Q_20            | How many cellular telephones are there in working condition?                           | <input type="text"/>                                                                        | Number<br>(if no cell phones exist then record 0)                                                                                                                          |
| Q_20a           | Do you have a personal cellular telephone? If yes, can you please give me your number? | Y/N <input type="text"/> MID <input type="text"/><br><br>Mobile No.<br><input type="text"/> | Yes ..... 1<br>No ..... 2                                                                                                                                                  |
| Q_20b           | Does anyone else in the household have a cellphone?                                    | Y/N <input type="text"/> MID <input type="text"/><br><br>Mobile No.<br><input type="text"/> | Yes ..... 1<br>No ..... 2                                                                                                                                                  |
| Q_20c           | Does anyone else in the household have a cellphone?                                    | Y/N <input type="text"/> MID <input type="text"/><br><br>Mobile No.<br><input type="text"/> | Yes ..... 1<br>No ..... 2                                                                                                                                                  |

Household Number:

| Question number | Question                                                                             | Response                                                                             | Response option                                                                                                                                                                             |
|-----------------|--------------------------------------------------------------------------------------|--------------------------------------------------------------------------------------|---------------------------------------------------------------------------------------------------------------------------------------------------------------------------------------------|
| Q_20d           | If yes, I transfer using                                                             | Y/N <input type="text"/> MID <input type="text"/><br>Mobile No. <input type="text"/> | Bkash ..... 1<br>Ucash ..... 2<br>Mcash..... 3<br>DBBL Mobile ..... 4<br>Other mobile banking(specify) .5<br>No mobile banking available ..... 6<br>No one in the HH has a mobile phone...7 |
| Q_21            | What was the total cost for cell phone service for all household members last month? | <input type="text"/>                                                                 | Taka                                                                                                                                                                                        |

Module End Time:  Hour   Minute

**Module R: Sanitation and Water (Male)**

Module Start Time:  Hour   Minute   Respondant ID:  Respondant's Consent:  Yes ..... 1  
No ..... 2

| Question number | Question                                                                                                | Response             | Response Code                                                                                                                                                                                                                     |
|-----------------|---------------------------------------------------------------------------------------------------------|----------------------|-----------------------------------------------------------------------------------------------------------------------------------------------------------------------------------------------------------------------------------|
| R01             | What type of latrine do you use?                                                                        | <input type="text"/> | None (open field) .....1<br>Kutcha (fixed place) .....2<br>Pucca (unsealed).....3<br>Sanitary without flush (water sealed) ..... 4<br>Sanitary with flush (water sealed) ...5<br>Community latrine.....6<br>Other (specify).....7 |
| R01a            | What type of latrine do you use? Can I see the latrine that is used by your household members?          | <input type="text"/> | <i>Note: Please observe and write the type of the latrine</i><br>Open field .....1<br>Latrine, slab cannot be cleaned .....2<br>Latrine, slab can be cleaned(concrete/china) ..... 3                                              |
| R01b            | Where does the discharged material go?                                                                  | <input type="text"/> | Directly to the pond, canal or other water body ....1<br>Sealed pit..... 2                                                                                                                                                        |
| R01c            | <i>Please observe:</i> only if the latrine is made by slab that can be cleaned (made of concrete/china) | <input type="text"/> | Flush at septic .....1<br>Can be flushed .....2<br>Cannot be flushed .....3                                                                                                                                                       |
| R01d            | <i>Please observe:</i> only if the latrine is made by slab that can be cleaned (made of concrete/china) | <input type="text"/> | Sanitary latrine (low pan) has curved piped outlet (broken) .. 1<br>Sanitary latrine (low pan) has curved piped outlet (not broken/in a good condition) .....2                                                                    |

Household Number:

| Question number | Question                                                                                                                               | Response                                                                             | Response Code                                                                                                                                            |
|-----------------|----------------------------------------------------------------------------------------------------------------------------------------|--------------------------------------------------------------------------------------|----------------------------------------------------------------------------------------------------------------------------------------------------------|
| R01e            | Do you share this latrine with other household                                                                                         | <input type="text"/>                                                                 | Yes .....1<br>No.....2                                                                                                                                   |
| R01f            | If yes, how many households use it?                                                                                                    | <input type="text"/>                                                                 | No. of hh.....                                                                                                                                           |
| R01g            | Is there any member/members in the hh who very rarely or does/do not use the latrine?                                                  | <input type="text"/>                                                                 | Yes .....1<br>No.....2                                                                                                                                   |
| R01h            | If yes, who are they?                                                                                                                  | <b>MID MID MID</b><br><input type="text"/> <input type="text"/> <input type="text"/> | Write MID                                                                                                                                                |
| R01i            | Where did your child whose age is less than 3 years defecate the last time?                                                            | <input type="text"/>                                                                 | Open field/space.....1<br>Inside home .....2<br>Inside the latrine used by the hh.....3<br>Latrine of some other hh .....4<br>Not applicable .....5>R01K |
| R01j            | Where was the waste of your less than 3 year old child's last defecation thrown?                                                       | <input type="text"/>                                                                 | In a definite place of a field where we usually throw other hh waste...1<br>Latrine that we usually use.....2<br>Some other place.....3                  |
|                 | Facilities of washing hands                                                                                                            |                                                                                      |                                                                                                                                                          |
| R01k            | <b>Please Observe:</b> Is there any arrangement for hand wash near the latrine? (cannot be any further than 10 steps from the latrine) | <input type="text"/>                                                                 | Yes .....1<br>No.....2                                                                                                                                   |
| R01L            | I can see that there is/ is not an arrangement to wash hands near the latrine. Is there any other hand wash area inside the household? | <input type="text"/>                                                                 | Dining area .....1<br>Kitchen .....2<br>Others .....3<br>No definite place for handwash.....9                                                            |
| R01m            | <b>Please Observe:</b> Is there water in that hand wash area?                                                                          | <input type="text"/>                                                                 | Yes .....1<br>No.....2                                                                                                                                   |
| R01n            | <b>Please Observe:</b> Is there any cleansing agent at the hand wash area?                                                             | <input type="text"/>                                                                 | Yes .....1<br>No.....2                                                                                                                                   |

Household Number:

| Question number | Question                                                                                     | Response             | Response Code                                                                                                                                                                                                                                                                                                                                                            |
|-----------------|----------------------------------------------------------------------------------------------|----------------------|--------------------------------------------------------------------------------------------------------------------------------------------------------------------------------------------------------------------------------------------------------------------------------------------------------------------------------------------------------------------------|
| <b>R01o</b>     | If yes, then list all the items that are there in the hand wash area.                        | <input type="text"/> | Soap.....1<br>Liquid soap.....2<br>Detergent powder.....3<br>Ash/earth.....4<br>Others.....5                                                                                                                                                                                                                                                                             |
| <b>R02</b>      | Does the household have access to a water supply?                                            | <input type="text"/> | Yes.....1<br>No.....2                                                                                                                                                                                                                                                                                                                                                    |
| R02a            | Where is that water source located?                                                          | <input type="text"/> | In own dwelling.....1<br>In own yard/plot.....2<br>Elsewhere.....3                                                                                                                                                                                                                                                                                                       |
| <b>R03</b>      | What is the source of water used for other purposes than drinking, cooking, taking a shower? | <input type="text"/> | Supply Water (piped)<br>inside house.....1<br>Supply Water (piped), outside.....2<br>Own tube well.....3<br>Community tubewell.....4<br>Rain water.....5<br>Ring Well/ Indara.....6<br>Pond/River/ Canal.....7<br>Bottled water.....8<br>Shallow tubewell for irrigation.....9<br>Deep tubewell for irrigation.....10<br>Other (specify).....11<br>Other tubewell.....12 |
| <b>R04</b>      | Is the source of drinking water same as the source of water used for other purposes?         | <input type="text"/> | Yes.....1>>R11<br>No.....2                                                                                                                                                                                                                                                                                                                                               |
| <b>R05</b>      | Source of drinking water                                                                     | <input type="text"/> | Supply Water (piped)<br>inside house.....1<br>Supply Water (piped), outside.....2<br>Own tube well.....3<br>Community tubewell.....4<br>Rain water.....5<br>Ring Well/ Indara.....6<br>Pond/River/ Canal.....7<br>Bottled water.....8<br>Shallow tubewell for irrigation.....9<br>Deep tubewell for irrigation.....10<br>Other (specify).....11<br>Other tubewell.....12 |



Household Number:

| Question number | Question                                                                                           | Response             | Response Code                                                                                                                                                                                                                                                                                                          |
|-----------------|----------------------------------------------------------------------------------------------------|----------------------|------------------------------------------------------------------------------------------------------------------------------------------------------------------------------------------------------------------------------------------------------------------------------------------------------------------------|
| R11             | What is the distance of the main source of drinking water from the household?                      | <input type="text"/> | Meter                                                                                                                                                                                                                                                                                                                  |
| R11a            | How long does it take to travel to the source of water, collect water and return to the household? | <input type="text"/> | Less than 5 minutes .....1<br>6-15 minutes .....2<br>16-30 minutes .....3<br>31-60 minutes .....4<br>More than 1 hour .....5                                                                                                                                                                                           |
| R11b            | How many times in a day do you collect drinking water?                                             | <input type="text"/> | Number of times                                                                                                                                                                                                                                                                                                        |
| R11c            | Will you please show me the container in which you preserve your water?                            | <input type="text"/> | Clay container .....1<br>Aluminium/metal container .....2<br>Steel container .....3<br>Other non-metallic contain(large) ..4<br>Plastic container .....5<br>Container with a plastic handle and a lid that can be used to close the top .....6<br>Glass bottle .....7<br>Other bottles .....8<br>Other(specify) .....9 |
| R11c2           | Is water available from this source all year round?                                                | <input type="text"/> | Yes .....1<br>No .....2<br>Don't know .....8                                                                                                                                                                                                                                                                           |

Household Number:

| Question number | Question                                                                | Response                                             | Response Code                                                                                                                                                                                                 |
|-----------------|-------------------------------------------------------------------------|------------------------------------------------------|---------------------------------------------------------------------------------------------------------------------------------------------------------------------------------------------------------------|
|                 |                                                                         |                                                      |                                                                                                                                                                                                               |
| R11c3           | In the past two weeks, was water available every day from this source?  | <input data-bbox="1077 687 1193 724" type="text"/>   | Yes .....1<br>No .....2<br>Don't know.....8                                                                                                                                                                   |
| R11d            | Is there a lid for the container?                                       | <input data-bbox="1081 1150 1198 1187" type="text"/> | Yes .....1<br>No .....2                                                                                                                                                                                       |
| R11e            | Is there a piped outlet from the container in which you preserve water? | <input data-bbox="1081 1224 1198 1260" type="text"/> | Yes .....1<br>No .....2                                                                                                                                                                                       |
| R11f            | If not, how do you obtain water from the container?                     | <input data-bbox="1081 1329 1198 1366" type="text"/> | Tilt the container and pour the water out 1<br>Immerse another container to get the water<br>out of the water container .....2<br>Obtain water from the holder without immersing<br>Your hands into it .....3 |

Household Number:

| Question number      | Question                                                                                                                                          | Response                                                                                                                                                                                                                                                                                                                         | Response Code                                                                                                                                                                                                                                                                                                                                                                                                                              |         |         |         |                      |  |  |  |                                                                                                                                                                                                                                                                                                                                                                                  |
|----------------------|---------------------------------------------------------------------------------------------------------------------------------------------------|----------------------------------------------------------------------------------------------------------------------------------------------------------------------------------------------------------------------------------------------------------------------------------------------------------------------------------|--------------------------------------------------------------------------------------------------------------------------------------------------------------------------------------------------------------------------------------------------------------------------------------------------------------------------------------------------------------------------------------------------------------------------------------------|---------|---------|---------|----------------------|--|--|--|----------------------------------------------------------------------------------------------------------------------------------------------------------------------------------------------------------------------------------------------------------------------------------------------------------------------------------------------------------------------------------|
| <b>R06a</b>          | In the past 24 hours, what steps have you taken to purify your water?                                                                             | <input type="text"/>                                                                                                                                                                                                                                                                                                             | Filtered .....1<br>Boiled .....2<br>Boiled and filtered .....3<br>Chemically treated (iodine/chlorine) 4<br>Iodine/chlorine/chemically treated ..5<br>UV treated .....6<br>Filtered using cloth and sand .....7<br>Filtered using commercial filter .....8<br>Boiled and filtered using cloth .....9<br>Boiled and filtered using commercial filter 10<br>Not purified .....11<br>Straight from source .....12<br>Others (specify) .....13 |         |         |         |                      |  |  |  |                                                                                                                                                                                                                                                                                                                                                                                  |
| <b>R07</b>           | If tubewell is used for drinking water, has the water been tested for arsenic contamination?                                                      | <input type="text"/>                                                                                                                                                                                                                                                                                                             | Yes .....1<br>No .....2>>R9a<br>Don't know.....3>> R9a                                                                                                                                                                                                                                                                                                                                                                                     |         |         |         |                      |  |  |  |                                                                                                                                                                                                                                                                                                                                                                                  |
| <b>R08</b>           | If yes, what color has the tubewell been marked?                                                                                                  | <input type="text"/>                                                                                                                                                                                                                                                                                                             | Red .....1<br>Green .....2>> R9a<br>None .....3>> R9a<br>Don't know.....4>> R9a                                                                                                                                                                                                                                                                                                                                                            |         |         |         |                      |  |  |  |                                                                                                                                                                                                                                                                                                                                                                                  |
| <b>R09</b>           | If it has been colored red, do you still use it for drinking purposes?                                                                            | <input type="text"/>                                                                                                                                                                                                                                                                                                             | Yes ..... 1<br>No .....2                                                                                                                                                                                                                                                                                                                                                                                                                   |         |         |         |                      |  |  |  |                                                                                                                                                                                                                                                                                                                                                                                  |
| <b>R09a</b>          | Is the source of drinking water the same throughout the year?                                                                                     | <input type="text"/>                                                                                                                                                                                                                                                                                                             | Yes ..... 1<br>No ..... 2                                                                                                                                                                                                                                                                                                                                                                                                                  |         |         |         |                      |  |  |  |                                                                                                                                                                                                                                                                                                                                                                                  |
| <b>R09b</b>          | If no, where else do you get your water from and during which months?<br><br>For months write January .....1, February.....2, .....December....12 | <table border="1" style="width: 100%; border-collapse: collapse;"> <tr> <td style="width: 15%;">Other source</td> <td style="width: 15%;">Month 1</td> <td style="width: 15%;">Month 2</td> <td style="width: 15%;">Month 3</td> </tr> <tr> <td colspan="4" style="text-align: center;"><input type="text"/></td> </tr> </table> | Other source                                                                                                                                                                                                                                                                                                                                                                                                                               | Month 1 | Month 2 | Month 3 | <input type="text"/> |  |  |  | Supply Water (piped) inside house .....1<br>Supply Water (piped), outside .....2<br>Own tube well .....3<br>Community tubewell .....4<br>Rain water .....5<br>Ring Well/ Indara .....6<br>Pond/River/ Canal .....7<br>Bottled water .....8<br>Shallow tubewell for irrigation.....9<br>Deep tubewell for irrigation .....10<br>Other (specify).....11<br>Other tubewell ..... 12 |
| Other source         | Month 1                                                                                                                                           | Month 2                                                                                                                                                                                                                                                                                                                          | Month 3                                                                                                                                                                                                                                                                                                                                                                                                                                    |         |         |         |                      |  |  |  |                                                                                                                                                                                                                                                                                                                                                                                  |
| <input type="text"/> |                                                                                                                                                   |                                                                                                                                                                                                                                                                                                                                  |                                                                                                                                                                                                                                                                                                                                                                                                                                            |         |         |         |                      |  |  |  |                                                                                                                                                                                                                                                                                                                                                                                  |

Household Number:

| Question number | Question                                                 | Response             | Response Code                                                                                                                                                                                                                                                                                                                                                                      |
|-----------------|----------------------------------------------------------|----------------------|------------------------------------------------------------------------------------------------------------------------------------------------------------------------------------------------------------------------------------------------------------------------------------------------------------------------------------------------------------------------------------|
| R12             | What is the primary source of water for cooking?         | <input type="text"/> | Supply Water (piped)<br>inside house .....1<br>Supply Water (piped), outside .....2<br>Own tube well .....3<br>Community tubewell .....4<br>Rain water .....5<br>Ring Well/ Indara .....6<br>Pond/River/ Canal .....7<br>Bottled water .....8<br>Shallow tubewell for irrigation.....9<br>Deep tubewell for irrigation .....10<br>Other (specify).....11<br>Other tubewell .....12 |
| R13             | What is the primary source of water for washing clothes? | <input type="text"/> | Supply Water (piped)<br>inside house .....1<br>Supply Water (piped), outside .....2<br>Own tube well .....3<br>Community tubewell .....4<br>Rain water .....5<br>Ring Well/ Indara .....6<br>Pond/River/ Canal .....7<br>Bottled water .....8<br>Shallow tubewell for irrigation.....9<br>Deep tubewell for irrigation .....10<br>Other (specify).....11<br>Other tubewell .....12 |
| R10             | How do you dispose garbage?                              | <input type="text"/> | Local authority collects .....1<br>Private firm collects .....2<br>Public garbage pit/hole .....3<br>Own garbage pit/hole .....4<br>Burnt/buried .....5<br>Own garbage heap (not pit) .....6<br>Gather in open place .....7<br>Throw in pond/khaal/beel .....8<br>Other (specify).....9                                                                                            |

Module End Time:  Hour   Minute

Household Number:

**Module R2: Domestic animals and poultry habitation and hygiene management (Male)**

Module start time: Hour   Minu   Respondent ID:  Consent :  Yes ...1  
No.....2

| Question number | Question                                                                                                                                                                                                                   | Response                                                                                                                                                             | Response Code                                                                                                                |
|-----------------|----------------------------------------------------------------------------------------------------------------------------------------------------------------------------------------------------------------------------|----------------------------------------------------------------------------------------------------------------------------------------------------------------------|------------------------------------------------------------------------------------------------------------------------------|
| R2_01           | If you have any children under the age of 5, have you ever seen them putting dirt/soil in their mouth?                                                                                                                     | <input type="text"/>                                                                                                                                                 | Yes, multiple occasions.....1<br>Yes, at least one occasion.....2<br>Never.....3                                             |
| R2_02           | If a child consumes soil, do you think this is..                                                                                                                                                                           | <input type="text"/>                                                                                                                                                 | Healthy.....1<br>Harmless.....2<br>Harmful.....3<br>Don't know.....4                                                         |
| R2_03           | Are any livestock or pets kept inside the main household dwelling overnight in the last one year?                                                                                                                          | <input type="text"/>                                                                                                                                                 | Yes..... 1<br>No..... 2>>R2_08                                                                                               |
| R2_04           | Which animals are kept inside the main household dwelling overnight?<br><br>[Multiple response allowed]<br><br>Enumerator : Ask about the remaining domestic animals or pets once the respondent has answered the question | <input type="text"/><br><input type="text"/><br><input type="text"/><br><input type="text"/><br><input type="text"/><br><input type="text"/><br><input type="text"/> | Chicken..... 1<br>Duck..... 2<br>Sheep..... 3<br>Goats..... 4<br>Cattle..... 5<br>Dogs..... 6<br>Others..... 7<br>None.....8 |
| R2_05           | Are any of these animals kept overnight in the same room/area where your children sleep?                                                                                                                                   | <input type="text"/>                                                                                                                                                 | Yes..... 1<br>No..... 2<br>No children..... 3                                                                                |

|       |                                                                                                                                            |                                                                                                                                                                                                  |                                                                                                                                                                                                                                                                |
|-------|--------------------------------------------------------------------------------------------------------------------------------------------|--------------------------------------------------------------------------------------------------------------------------------------------------------------------------------------------------|----------------------------------------------------------------------------------------------------------------------------------------------------------------------------------------------------------------------------------------------------------------|
| R2_06 | <p>Which of these animals leave droppings in the household?</p> <p>[Multiple response allowed]</p>                                         | <input type="checkbox"/><br><input type="checkbox"/><br><input type="checkbox"/><br><input type="checkbox"/><br><input type="checkbox"/><br><input type="checkbox"/><br><input type="checkbox"/> | <p>Chicken.....1<br/>                 Duck.....2<br/>                 Sheep..... 3<br/>                 Goats..... 4<br/>                 Cattle..... 5<br/>                 Dogs.....6<br/>                 Others..... 7<br/>                 None.....8</p> |
| R2_07 | <p>How often do you remove/discard animal droppings?</p>                                                                                   | <input type="checkbox"/>                                                                                                                                                                         | <p>Daily .....1<br/>                 Several times a week ..... 2<br/>                 Occasionally.....3<br/>                 Never..... 4</p>                                                                                                                |
| R2_08 | <p>If you have a child under 5, do they often come into direct physical contact with these animals?</p> <p>[Multiple response allowed]</p> | <input type="checkbox"/><br><input type="checkbox"/><br><input type="checkbox"/><br><input type="checkbox"/><br><input type="checkbox"/><br><input type="checkbox"/><br><input type="checkbox"/> | <p>Chicken.....1<br/>                 Duck.....2<br/>                 Sheep..... 3<br/>                 Goats..... 4<br/>                 Cattle..... 5<br/>                 Dogs.....6<br/>                 Others..... 7<br/>                 None.....8</p> |

Household Number:

| Enumerator Observes: |                                                                                                                    |                      |                                                   |
|----------------------|--------------------------------------------------------------------------------------------------------------------|----------------------|---------------------------------------------------|
| R2_09                | [OBSERVATION]: Can we observe poultry feces (chicken, ducks, bird, etc.)<br>Around the house or in the compound?   | <input type="text"/> | Yes..... 1<br>No..... 2<br>Cannot observe..... 88 |
| R2_10                | [OBSERVATION]: Can we observe other animal feces (dog, cat, cattles, etc.)<br>Around the house or in the compound? | <input type="text"/> | Yes..... 1<br>No..... 2<br>Cannot observe..... 88 |
| R2_11                | [OBSERVATION]: Can you observe other garbage lying around in the house or<br>compound?                             | <input type="text"/> | Yes..... 1<br>No..... 2<br>Cannot observe.....88  |

Module End Time: 

|      |                      |                      |        |                      |                      |
|------|----------------------|----------------------|--------|----------------------|----------------------|
| Hour | <input type="text"/> | <input type="text"/> | Minute | <input type="text"/> | <input type="text"/> |
|------|----------------------|----------------------|--------|----------------------|----------------------|

Household Number:

**Module S: Access to Facilities (Male)**

Module Start Time: Hour   Minute

Respondant ID:  Respondant's Consent:  Yes .....1  
No .....2

| Code | List of Facilities     | Does any household member visit this facility regularly?<br>Yes .....1<br>No .....2>> Next row | What mode of transportation do you normally use to get to the closest facilities?<br>(multiple responses possible-list 3)<br>Foot..... 1<br>Bicycle..... 2<br>Rickshaw/Van..... 3<br>Bullock cart..... 4<br>Boat..... 5<br>Engine boat ..... 6<br>Motorcycle..... 7<br>Tempo/Baby taxi/Nosimon 8<br>Bus..... 9<br>Train ..... 10<br>Other ..... 11 |       |       | Distance | How long does it normally take to get from your house to the closest facility? |         |
|------|------------------------|------------------------------------------------------------------------------------------------|----------------------------------------------------------------------------------------------------------------------------------------------------------------------------------------------------------------------------------------------------------------------------------------------------------------------------------------------------|-------|-------|----------|--------------------------------------------------------------------------------|---------|
| Code | Facilities             | Code ↑                                                                                         | Code ↑                                                                                                                                                                                                                                                                                                                                             |       |       | Km       | Hour                                                                           | Minutes |
| Code | S_01                   | S_02                                                                                           | S03_a                                                                                                                                                                                                                                                                                                                                              | S03_b | S03_c | S_04     | S_05                                                                           | S_06    |
| 01   | Health center/hospital |                                                                                                |                                                                                                                                                                                                                                                                                                                                                    |       |       |          |                                                                                |         |
| 20   | Community Clinic       |                                                                                                |                                                                                                                                                                                                                                                                                                                                                    |       |       |          |                                                                                |         |
| 02   | Bus stop               |                                                                                                |                                                                                                                                                                                                                                                                                                                                                    |       |       |          |                                                                                |         |
| 03   | Main road              |                                                                                                |                                                                                                                                                                                                                                                                                                                                                    |       |       |          |                                                                                |         |
| 04   | Railway station        |                                                                                                |                                                                                                                                                                                                                                                                                                                                                    |       |       |          |                                                                                |         |
| 05   | Local shop/shops       |                                                                                                |                                                                                                                                                                                                                                                                                                                                                    |       |       |          |                                                                                |         |
| 06   | Weekly/periodic bazaar |                                                                                                |                                                                                                                                                                                                                                                                                                                                                    |       |       |          |                                                                                |         |
| 07   | Nearest town           |                                                                                                |                                                                                                                                                                                                                                                                                                                                                    |       |       |          |                                                                                |         |
| 09   | Agricultural office    |                                                                                                |                                                                                                                                                                                                                                                                                                                                                    |       |       |          |                                                                                |         |
| 10   | Post office            |                                                                                                |                                                                                                                                                                                                                                                                                                                                                    |       |       |          |                                                                                |         |
| 11   | Bank                   |                                                                                                |                                                                                                                                                                                                                                                                                                                                                    |       |       |          |                                                                                |         |
| 12   | BRAC                   |                                                                                                |                                                                                                                                                                                                                                                                                                                                                    |       |       |          |                                                                                |         |



Household Number:

|    |                                   |  |  |  |  |  |  |  |
|----|-----------------------------------|--|--|--|--|--|--|--|
| 13 | Grameen Bank                      |  |  |  |  |  |  |  |
| 14 | ASA                               |  |  |  |  |  |  |  |
| 15 | Other NGO                         |  |  |  |  |  |  |  |
| 16 | Internet access                   |  |  |  |  |  |  |  |
| 17 | Kindergarten School               |  |  |  |  |  |  |  |
| 18 | Primary school for girls          |  |  |  |  |  |  |  |
| 19 | Primary school for boys           |  |  |  |  |  |  |  |
| 21 | Primary school (boys and girls)   |  |  |  |  |  |  |  |
| 22 | Secondary School (girls)          |  |  |  |  |  |  |  |
| 23 | Secondary school (boys)           |  |  |  |  |  |  |  |
| 24 | Secondary school (boys and girls) |  |  |  |  |  |  |  |
| 8  | College                           |  |  |  |  |  |  |  |
| 25 | Madrassa (female)                 |  |  |  |  |  |  |  |
| 26 | Madrassa (male)                   |  |  |  |  |  |  |  |
| 27 | Madrassa (both)                   |  |  |  |  |  |  |  |
| 28 | Seed dealer                       |  |  |  |  |  |  |  |
| 29 | Fertilizer dealer                 |  |  |  |  |  |  |  |
| 30 | Pesticide dealer                  |  |  |  |  |  |  |  |

Module End Time:  Hour   Minute

Household Number:

**Module T: Economic Events/Shocks (Male)**

**Module T1b: Negative Shocks (Male)**

Recall period: Since the midline survey / For GFSS households, since 2015 & in the last 12 months

Module start time: 

|      |                      |                      |      |                      |                      |
|------|----------------------|----------------------|------|----------------------|----------------------|
| Hour | <input type="text"/> | <input type="text"/> | Minu | <input type="text"/> | <input type="text"/> |
|------|----------------------|----------------------|------|----------------------|----------------------|

 Respondent ID:  Consent :  Yes...1 No....2

*For the specified recall period, record information on negative shocks faced by the household.*

| Shocks (unexpected events)                                                                                                                              | Shock Code | Since midline survey/ For GFSS households, since 2015, did the event occur?<br>Yes.....1<br>No.....2 >><br>Next row | In the past 12 months, did the event occur?<br>Yes.....1<br>No.....2 >><br>Next row | How severe was the impact of this event on your household's economic condition?<br>Not Severe ..... 1<br>Somewhat severe ..... 2<br>Severe ..... 3<br>Extremely Severe ..... 4<br>Refused ..... 7 | How severe was the impact of this event on your household's food consumption?<br>Not Severe ..... 1<br>Somewhat severe ..... 2<br>Severe ..... 3<br>Extremely Severe ..... 4<br>Refused ..... 7 | What did you do to cope with this shock?<br>(bring up to 3 coping strategies) |         |         |
|---------------------------------------------------------------------------------------------------------------------------------------------------------|------------|---------------------------------------------------------------------------------------------------------------------|-------------------------------------------------------------------------------------|---------------------------------------------------------------------------------------------------------------------------------------------------------------------------------------------------|-------------------------------------------------------------------------------------------------------------------------------------------------------------------------------------------------|-------------------------------------------------------------------------------|---------|---------|
| Shock                                                                                                                                                   | Code       |                                                                                                                     |                                                                                     | Code ↑                                                                                                                                                                                            | Code ↑                                                                                                                                                                                          | Code 1                                                                        |         |         |
| T1b_01                                                                                                                                                  |            | T1b_02                                                                                                              | T1b_03                                                                              | T1b_04                                                                                                                                                                                            | T1b_05                                                                                                                                                                                          | T1b_06a                                                                       | T1b_06b | T1b_06c |
| Did your household face difficult times as a result of having too much rain?                                                                            | 41         |                                                                                                                     |                                                                                     |                                                                                                                                                                                                   |                                                                                                                                                                                                 |                                                                               |         |         |
| Did your household face difficult times as a result of having too little rain?                                                                          | 42         |                                                                                                                     |                                                                                     |                                                                                                                                                                                                   |                                                                                                                                                                                                 |                                                                               |         |         |
| Did your household face difficult times as a result of land erosion?                                                                                    | 43         |                                                                                                                     |                                                                                     |                                                                                                                                                                                                   |                                                                                                                                                                                                 |                                                                               |         |         |
| Did your household face difficult times as a result of having too much rain?                                                                            | 44         |                                                                                                                     |                                                                                     |                                                                                                                                                                                                   |                                                                                                                                                                                                 |                                                                               |         |         |
| Did your household face difficult times as a result of food price inflation?                                                                            | 45         |                                                                                                                     |                                                                                     |                                                                                                                                                                                                   |                                                                                                                                                                                                 |                                                                               |         |         |
| Did your household face difficult times as a result of someone stealing or destroying household member's belongings?                                    | 46         |                                                                                                                     |                                                                                     |                                                                                                                                                                                                   |                                                                                                                                                                                                 |                                                                               |         |         |
| Did your household face difficult times as a result of not being able to access inputs for your                                                         | 47         |                                                                                                                     |                                                                                     |                                                                                                                                                                                                   |                                                                                                                                                                                                 |                                                                               |         |         |
| Did your household face difficult times as a result of disease affecting your crops ?                                                                   | 102        |                                                                                                                     |                                                                                     |                                                                                                                                                                                                   |                                                                                                                                                                                                 |                                                                               |         |         |
| Did your household face difficult times as a result of pest infesting your crops ?                                                                      | 103        |                                                                                                                     |                                                                                     |                                                                                                                                                                                                   |                                                                                                                                                                                                 |                                                                               |         |         |
| Did your household face difficult times as a result of theft of your household's crops ?                                                                | 48         |                                                                                                                     |                                                                                     |                                                                                                                                                                                                   |                                                                                                                                                                                                 |                                                                               |         |         |
| Did your household face difficult times as a result of not being able to access inputs for your                                                         | 49         |                                                                                                                     |                                                                                     |                                                                                                                                                                                                   |                                                                                                                                                                                                 |                                                                               |         |         |
| Did your household face difficult times as a result of disease affecting your livestock ?                                                               | 50         |                                                                                                                     |                                                                                     |                                                                                                                                                                                                   |                                                                                                                                                                                                 |                                                                               |         |         |
| Did your household face difficult times as a result of theft of your household's livestock?                                                             | 13         |                                                                                                                     |                                                                                     |                                                                                                                                                                                                   |                                                                                                                                                                                                 |                                                                               |         |         |
| Did your household face difficult times as a result of not being able to sell the crops, livestock or other products of your household at a fair price? | 51         |                                                                                                                     |                                                                                     |                                                                                                                                                                                                   |                                                                                                                                                                                                 |                                                                               |         |         |
| Is/Has anyone in your household experiencing/experienced a severe illness?                                                                              | 52         |                                                                                                                     |                                                                                     |                                                                                                                                                                                                   |                                                                                                                                                                                                 |                                                                               |         |         |

Household Number:

| Shocks (unexpected events)                                                                                         | Shock Code | Since midline survey/ For GFSS households, since 2015, did the event occur?<br><br>Yes.....1<br>No.....2 >><br>Next row | In the past 12 months, did the event occur?<br><br>Yes.....1<br>No.....2 >><br>Next row | How severe was the impact of this event on your household's economic condition?<br><br>Not Severe..... 1<br>Somewhat severe..... 2<br>Severe..... 3<br>Extremely Severe ..... 4<br>Refused ..... 7 | How severe was the impact of this event on your household's food consumption?<br><br>Not Severe ..... 1<br>Somewhat severe ..... 2<br>Severe ..... 3<br>Extremely Severe ..... 4<br>Refused ..... 7 | What did you do to cope with this shock?<br><br>(bring up to 3 coping strategies) |         |         |
|--------------------------------------------------------------------------------------------------------------------|------------|-------------------------------------------------------------------------------------------------------------------------|-----------------------------------------------------------------------------------------|----------------------------------------------------------------------------------------------------------------------------------------------------------------------------------------------------|-----------------------------------------------------------------------------------------------------------------------------------------------------------------------------------------------------|-----------------------------------------------------------------------------------|---------|---------|
| Shock                                                                                                              | Code       |                                                                                                                         |                                                                                         | Code ↑                                                                                                                                                                                             | Code ↑                                                                                                                                                                                              | Code 1                                                                            |         |         |
| T1b_01                                                                                                             |            | T1b_02                                                                                                                  | T1b_03                                                                                  | T1b_04                                                                                                                                                                                             | T1b_05                                                                                                                                                                                              | T1b_06a                                                                           | T1b_06b | T1b_06c |
| Did your household have to bear medical expenses due to illness or injury of a household member?                   | 4          |                                                                                                                         |                                                                                         |                                                                                                                                                                                                    |                                                                                                                                                                                                     |                                                                                   |         |         |
| Did your household experience loss of income due to illness or injury of a household member?                       | 3          |                                                                                                                         |                                                                                         |                                                                                                                                                                                                    |                                                                                                                                                                                                     |                                                                                   |         |         |
| Has your household experienced the death of a family member?                                                       | 2          |                                                                                                                         |                                                                                         |                                                                                                                                                                                                    |                                                                                                                                                                                                     |                                                                                   |         |         |
| Has your household experienced the death of the main earner of the family?                                         | 1          |                                                                                                                         |                                                                                         |                                                                                                                                                                                                    |                                                                                                                                                                                                     |                                                                                   |         |         |
| Has anyone in your household experienced loss of a regular job?                                                    | 5          |                                                                                                                         |                                                                                         |                                                                                                                                                                                                    |                                                                                                                                                                                                     |                                                                                   |         |         |
| Did you lose your home due to a river erosion?                                                                     | 6          |                                                                                                                         |                                                                                         |                                                                                                                                                                                                    |                                                                                                                                                                                                     |                                                                                   |         |         |
| Did you lose your home (due to any other reason besides river erosion)?                                            | 7          |                                                                                                                         |                                                                                         |                                                                                                                                                                                                    |                                                                                                                                                                                                     |                                                                                   |         |         |
| Did anyone in your household become divorced/seperated?                                                            | 8          |                                                                                                                         |                                                                                         |                                                                                                                                                                                                    |                                                                                                                                                                                                     |                                                                                   |         |         |
| Did your household lose crops due to floods?                                                                       | 9          |                                                                                                                         |                                                                                         |                                                                                                                                                                                                    |                                                                                                                                                                                                     |                                                                                   |         |         |
| Did your household lose crops due to a cyclone?                                                                    | 101        |                                                                                                                         |                                                                                         |                                                                                                                                                                                                    |                                                                                                                                                                                                     |                                                                                   |         |         |
| Did your household lose crops due to any other reasons, besides flood/cyclone? (example: hailstorm, drought, etc.) | 104        |                                                                                                                         |                                                                                         |                                                                                                                                                                                                    |                                                                                                                                                                                                     |                                                                                   |         |         |
| Did your household lose livestock due to floods?                                                                   | 11         |                                                                                                                         |                                                                                         |                                                                                                                                                                                                    |                                                                                                                                                                                                     |                                                                                   |         |         |
| Did your household lose livestock due to cyclone?                                                                  | 111        |                                                                                                                         |                                                                                         |                                                                                                                                                                                                    |                                                                                                                                                                                                     |                                                                                   |         |         |
| Did your household lose livestock due to death of livestock?                                                       | 12         |                                                                                                                         |                                                                                         |                                                                                                                                                                                                    |                                                                                                                                                                                                     |                                                                                   |         |         |
| Did your household lose productive assets due to floods?                                                           | 14         |                                                                                                                         |                                                                                         |                                                                                                                                                                                                    |                                                                                                                                                                                                     |                                                                                   |         |         |
| Did your household lose productive assets due to destruction in fire?                                              | 151        |                                                                                                                         |                                                                                         |                                                                                                                                                                                                    |                                                                                                                                                                                                     |                                                                                   |         |         |
| Aside from cyclone, did your household lose productive assets for other reasons (such as theft, river erosion)?    | 152        |                                                                                                                         |                                                                                         |                                                                                                                                                                                                    |                                                                                                                                                                                                     |                                                                                   |         |         |
| Did your household lose consumption assets due to floods?                                                          | 16         |                                                                                                                         |                                                                                         |                                                                                                                                                                                                    |                                                                                                                                                                                                     |                                                                                   |         |         |

Household Number:

| Shocks (unexpected events)                                                                   | Shock Code | Since midline survey/ For GFSS households, since 2015, did the event occur?<br><br>Yes.....1<br>No.....2 >><br>Next row | In the past 12 months, did the event occur?<br><br>Yes.....1<br>No.....2 >><br>Next row | How severe was the impact of this event on your household's economic condition?<br><br>Not Severe..... 1<br>Somewhat severe..... 2<br>Severe..... 3<br>Extremely Severe ..... 4<br>Refused ..... 7 | How severe was the impact of this event on your household's food consumption?<br><br>Not Severe ..... 1<br>Somewhat severe ..... 2<br>Severe ..... 3<br>Extremely Severe..... 4<br>Refused ..... 7 | What did you do to cope with this shock?<br><br>(bring up to 3 coping strategies) |         |         |
|----------------------------------------------------------------------------------------------|------------|-------------------------------------------------------------------------------------------------------------------------|-----------------------------------------------------------------------------------------|----------------------------------------------------------------------------------------------------------------------------------------------------------------------------------------------------|----------------------------------------------------------------------------------------------------------------------------------------------------------------------------------------------------|-----------------------------------------------------------------------------------|---------|---------|
|                                                                                              |            |                                                                                                                         |                                                                                         |                                                                                                                                                                                                    |                                                                                                                                                                                                    | Code                                                                              | Code 1  | Code 1  |
| T1b_01                                                                                       |            | T1b_02                                                                                                                  | T1b_03                                                                                  | Code ↑<br>T1b_04                                                                                                                                                                                   | Code ↑<br>T1b_05                                                                                                                                                                                   | T1b_06a                                                                           | T1b_06b | T1b_06c |
| Did your household have to pay dowry?                                                        | 18         |                                                                                                                         |                                                                                         |                                                                                                                                                                                                    |                                                                                                                                                                                                    |                                                                                   |         |         |
| Did your household have to spend on other costs for a wedding?                               | 19         |                                                                                                                         |                                                                                         |                                                                                                                                                                                                    |                                                                                                                                                                                                    |                                                                                   |         |         |
| Did your household face division of father's property?                                       | 20         |                                                                                                                         |                                                                                         |                                                                                                                                                                                                    |                                                                                                                                                                                                    |                                                                                   |         |         |
| Did your household face failure or bankruptcy of business?                                   | 21         |                                                                                                                         |                                                                                         |                                                                                                                                                                                                    |                                                                                                                                                                                                    |                                                                                   |         |         |
| Did your household experience extortion by mastans?                                          | 22         |                                                                                                                         |                                                                                         |                                                                                                                                                                                                    |                                                                                                                                                                                                    |                                                                                   |         |         |
| Was any member of your household imprisoned by the police?                                   | 23         |                                                                                                                         |                                                                                         |                                                                                                                                                                                                    |                                                                                                                                                                                                    |                                                                                   |         |         |
| Was any member of your household arrested by the police?                                     | 24         |                                                                                                                         |                                                                                         |                                                                                                                                                                                                    |                                                                                                                                                                                                    |                                                                                   |         |         |
| Did any one in your household have to pay a big bribe?                                       | 25         |                                                                                                                         |                                                                                         |                                                                                                                                                                                                    |                                                                                                                                                                                                    |                                                                                   |         |         |
| Did your household have to cover the cost for the court case of a member?                    | 26         |                                                                                                                         |                                                                                         |                                                                                                                                                                                                    |                                                                                                                                                                                                    |                                                                                   |         |         |
| Did you experience any loss due to the court case?                                           | 27         |                                                                                                                         |                                                                                         |                                                                                                                                                                                                    |                                                                                                                                                                                                    |                                                                                   |         |         |
| Did your household cover the reparations for victim of crime committed by a household        | 28         |                                                                                                                         |                                                                                         |                                                                                                                                                                                                    |                                                                                                                                                                                                    |                                                                                   |         |         |
| Was your household negatively affected by long duration of hartals/strikes/political unrest? | 29         |                                                                                                                         |                                                                                         |                                                                                                                                                                                                    |                                                                                                                                                                                                    |                                                                                   |         |         |
| Did your household experience cut-off or decrease of regular remittances to household?       | 30         |                                                                                                                         |                                                                                         |                                                                                                                                                                                                    |                                                                                                                                                                                                    |                                                                                   |         |         |
| Did your household experience the withdrawal of NGO assistance?                              | 31         |                                                                                                                         |                                                                                         |                                                                                                                                                                                                    |                                                                                                                                                                                                    |                                                                                   |         |         |
| Did your household experience cut-off of benefits from a social safety program?              | 52         |                                                                                                                         |                                                                                         |                                                                                                                                                                                                    |                                                                                                                                                                                                    |                                                                                   |         |         |
| Other (please specify) - 1                                                                   | 34         |                                                                                                                         |                                                                                         |                                                                                                                                                                                                    |                                                                                                                                                                                                    |                                                                                   |         |         |
| Other (please specify) - 2                                                                   | 35         |                                                                                                                         |                                                                                         |                                                                                                                                                                                                    |                                                                                                                                                                                                    |                                                                                   |         |         |

Household Number:

**Code list for Module T1:**

| Code 1: Coping strategies                                         |                                                                  |                                                                |
|-------------------------------------------------------------------|------------------------------------------------------------------|----------------------------------------------------------------|
| None..... 1                                                       | Ate less food to reduce expenses..... 10                         | Emergency receipt of remittance from migrant family member. 20 |
| Sold land (specify homestead or agricultural) ..... 2             | Ate lower quality food to reduce expenses..... 11                | Forced to change occupation..... 21                            |
| Mortgaged/leased land (specify homestead or agricultural) ..... 3 | Took children out of school ..... 12                             | Moved to less expensive housing..... 22                        |
| Sold productive asset (specify)..... 4                            | Transferred children to less expensive school ..... 13           | Sent non-working household member to work..... 23              |
| Mortgaged productive asset (specify)..... 5                       | Adult household member took job elsewhere temporarily ..... 14   | Took help from others ..... 24                                 |
| Sold consumption asset (specify) ..... 6                          | Sent household member away permanently ..... 15                  | Other (specify) ..... 25                                       |
| Mortgaged consumption asset (specify) ..... 7                     | Sent children to be fostered by relatives ..... 16               |                                                                |
| Took loan from NGO/institution ..... 8                            | Sent children into domestic service ..... 17                     |                                                                |
| Took loan from mahajan/non-institutional source ..... 9           | Sent children to work somewhere other than domestic service . 18 |                                                                |
|                                                                   | Sent wife and children to his parental home..... 19              |                                                                |

**Module T1c: Severe Disaster (Male)**

| Serial no. | Question                                                                                                       | Response             | Response Code           |
|------------|----------------------------------------------------------------------------------------------------------------|----------------------|-------------------------|
| T1c_01     | What has been the biggest disaster you faced in last 12 months that has affected your household most severely? | <input type="text"/> | Insert code from T1b_01 |
| T1c_02     | What has been the biggest disaster you faced in last 5 years that has affected your household most severely?   | <input type="text"/> | Not Applicable..... 98  |

**Module T1c: Insurance (Male)**

| Serial no. | Question                                                        | Response                                                       | Response Code                                                                                                                     |
|------------|-----------------------------------------------------------------|----------------------------------------------------------------|-----------------------------------------------------------------------------------------------------------------------------------|
| T1c_03     | Do you or any of your hh member have any insurance of any kind? | <input type="text"/>                                           | Yes..... 1<br>No ..... 2                                                                                                          |
| T1c_04     | If yes, what type of insurance?                                 | <input type="text"/> <input type="text"/> <input type="text"/> | Life insurance.....1<br>Medical insurance.....2<br>Crop insurance.....3<br>Property insurance.....4<br>Other (please specify)...5 |

Household Number:

**Module T2: Positive Economic Events (Male)**

Recall period: Since midline. Now ask about any positive events that benefited the household financially.

| Events                                 | Event Code   | Did the household experience any positive events last since midline?<br>Yes..... 1<br>No..... 2 → NEXT EVENT | The last time it happened, what year did it happen?<br>(year) |                                               | Rank the most important positive events<br><br>Most important ..... 1<br>2 <sup>nd</sup> most important . 2<br>3 <sup>rd</sup> most important . 3 |              |
|----------------------------------------|--------------|--------------------------------------------------------------------------------------------------------------|---------------------------------------------------------------|-----------------------------------------------|---------------------------------------------------------------------------------------------------------------------------------------------------|--------------|
|                                        |              |                                                                                                              | What year did it happen?                                      | What was the price of the acquired item (TK)? |                                                                                                                                                   |              |
|                                        |              |                                                                                                              | Month                                                         | Year                                          |                                                                                                                                                   |              |
| <b>T2_01</b>                           | <b>T2_02</b> | <b>T2_03</b>                                                                                                 | <b>T2_04</b>                                                  | <b>T2_05</b>                                  | <b>T2_06</b>                                                                                                                                      | <b>T2_07</b> |
| New regular job for household member   | <b>01</b>    |                                                                                                              |                                                               |                                               |                                                                                                                                                   |              |
| New or increased remittances           | <b>02</b>    |                                                                                                              |                                                               |                                               |                                                                                                                                                   |              |
| Inheritance                            | <b>03</b>    |                                                                                                              |                                                               |                                               |                                                                                                                                                   |              |
| Large gift/lottery winnings            | <b>04</b>    |                                                                                                              |                                                               |                                               |                                                                                                                                                   |              |
| Receipt of dowry                       | <b>05</b>    |                                                                                                              |                                                               |                                               |                                                                                                                                                   |              |
| Gain from business activities, specify | <b>06</b>    |                                                                                                              |                                                               |                                               |                                                                                                                                                   |              |
| Scholarship for child's education      | <b>07</b>    |                                                                                                              |                                                               |                                               |                                                                                                                                                   |              |
| New NGO IGA starts                     | <b>08</b>    |                                                                                                              |                                                               |                                               |                                                                                                                                                   |              |
| Primary Education Stipend (100 taka)   | <b>09</b>    |                                                                                                              |                                                               |                                               |                                                                                                                                                   |              |
| Secondary school stipend               | <b>10</b>    |                                                                                                              |                                                               |                                               |                                                                                                                                                   |              |
| Other 1 (specify)                      | <b>11</b>    |                                                                                                              |                                                               |                                               |                                                                                                                                                   |              |
| Other 2 (specify)                      | <b>12</b>    |                                                                                                              |                                                               |                                               |                                                                                                                                                   |              |
| Other 3 (specify)                      | <b>13</b>    |                                                                                                              |                                                               |                                               |                                                                                                                                                   |              |

Module End Time: 

|      |  |  |        |  |  |
|------|--|--|--------|--|--|
| Hour |  |  | Minute |  |  |
|------|--|--|--------|--|--|

Household Number:

**Module U: Participation in Social Safety Net Programs (Male)**

Collect data for last one year. Applicable for all household members. In case of participation in multiple programs report MID of all participants.

Module start time: Hour   Minu

Respondent ID:  Consent :  Yes ...1  
No.....2

| Sl. No | Description                                                   | Has s/he got any assistance?<br>Yes .....1<br>No .....2 >> next row | Member ID |      | Cash | Rice |     | Wheat         |     | Other food | Other in-kind |            |              |
|--------|---------------------------------------------------------------|---------------------------------------------------------------------|-----------|------|------|------|-----|---------------|-----|------------|---------------|------------|--------------|
|        |                                                               |                                                                     | Code ↑    |      |      | Tk   | Kg  | Value (Tk/kg) | Kg  |            | Value (Tk/kg) | Value (Tk) | Subsidy Code |
| SLNO   |                                                               | U01                                                                 | MID1      | MID2 | U02  | U03  | U04 | U05           | U06 | U07        | U09           | U010       | U08          |
| 01     | Ananda School                                                 |                                                                     |           |      |      |      |     |               |     |            |               |            |              |
| 02     | Stipend for Primary Students                                  |                                                                     |           |      |      |      |     |               |     |            |               |            |              |
| 03     | School Feeding Program                                        |                                                                     |           |      |      |      |     |               |     |            |               |            |              |
| 04     | Stipend for Dropout Students                                  |                                                                     |           |      |      |      |     |               |     |            |               |            |              |
| 05     | Stipend for Secondary and Higher Secondary/Female Student     |                                                                     |           |      |      |      |     |               |     |            |               |            |              |
| 06     | Stipend for Poor Boys in secondary school                     |                                                                     |           |      |      |      |     |               |     |            |               |            |              |
| 07     | Stipend for Disabled Students                                 |                                                                     |           |      |      |      |     |               |     |            |               |            |              |
| 08     | Old Age Allowance                                             |                                                                     |           |      |      |      |     |               |     |            |               |            |              |
| 09     | Allowances for Distressed Cultural Personalities/ Activists   |                                                                     |           |      |      |      |     |               |     |            |               |            |              |
| 10     | Allowances for beneficiaries in Ctg. Hill Tract area.         |                                                                     |           |      |      |      |     |               |     |            |               |            |              |
| 11     | Allowances for the Widowed, Deserted and Destitute Women      |                                                                     |           |      |      |      |     |               |     |            |               |            |              |
| 12     | Allowances for the Financially Insolvent Disabled             |                                                                     |           |      |      |      |     |               |     |            |               |            |              |
| 13     | Maternity allowance program for the Poor Lactating Mothers    |                                                                     |           |      |      |      |     |               |     |            |               |            |              |
| 14     | Maternal Health Voucher Scheme                                |                                                                     |           |      |      |      |     |               |     |            |               |            |              |
| 47     | Improving Maternal and Child Nutrition (IMCN)                 |                                                                     |           |      |      |      |     |               |     |            |               |            |              |
| 15     | Honorarium for Insolvent Freedom Fighters                     |                                                                     |           |      |      |      |     |               |     |            |               |            |              |
| 16     | Honorarium for Injured Freedom Fighters                       |                                                                     |           |      |      |      |     |               |     |            |               |            |              |
| 49     | Ration Program for Martyr Family and Wounded Freedom Fighters |                                                                     |           |      |      |      |     |               |     |            |               |            |              |
| 17     | Gratuitous Relief (Cash)                                      |                                                                     |           |      |      |      |     |               |     |            |               |            |              |
| 18     | Gratuitous Relief (GR)- Food                                  |                                                                     |           |      |      |      |     |               |     |            |               |            |              |
| 19     | General Relief Activities                                     |                                                                     |           |      |      |      |     |               |     |            |               |            |              |
| 20     | Cash For Work                                                 |                                                                     |           |      |      |      |     |               |     |            |               |            |              |
| 21     | Agriculture Rehabilitation                                    |                                                                     |           |      |      |      |     |               |     |            |               |            |              |
| 22     | Subsidy for Open Market Sales                                 |                                                                     |           |      |      |      |     |               |     |            |               |            |              |
| 23     | Vulnerable Group Development (VGD)                            |                                                                     |           |      |      |      |     |               |     |            |               |            |              |

Household Number:

| Sl. No | Description                                                                          | Has s/he got any assistance?<br>Yes .....1<br>No .....2 >> next row | Member ID | Cash | Rice | Wheat | Other food | Other in-kind |        |       |
|--------|--------------------------------------------------------------------------------------|---------------------------------------------------------------------|-----------|------|------|-------|------------|---------------|--------|-------|
|        |                                                                                      |                                                                     |           |      |      |       |            | Subsidy Code  | Number | Price |
| 24     | VGD-UP (8 District on Monga Area)                                                    |                                                                     |           |      |      |       |            |               |        |       |
| 25     | Vulnerable Group Feeding (VGF)                                                       |                                                                     |           |      |      |       |            |               |        |       |
| 261    | Test Relief (TR) Food                                                                |                                                                     |           |      |      |       |            |               |        |       |
| 262    | Test Relief (TR) Cash                                                                |                                                                     |           |      |      |       |            |               |        |       |
| 27     | Food Assistance in CTG-Hill tracts Area                                              |                                                                     |           |      |      |       |            |               |        |       |
| 28     | Food For Work (FFW)                                                                  |                                                                     |           |      |      |       |            |               |        |       |
| 29     | Special fund for Employment Generation for Hard-core Poor in SIDR Area               |                                                                     |           |      |      |       |            |               |        |       |
| 30     | Fund for the Welfare of Acid Burnt and Disables                                      |                                                                     |           |      |      |       |            |               |        |       |
| 31     | 100 days Employment Scheme / Employment Generation Program for the Poorest (EGPP)    |                                                                     |           |      |      |       |            |               |        |       |
| 32     | Rural Employment Opportunities for Protection of Public Property (REOPA)             |                                                                     |           |      |      |       |            |               |        |       |
| 33     | Rural Employment and Rural Maintenance Program (RERMP)                               |                                                                     |           |      |      |       |            |               |        |       |
| 34     | Community Nutrition Program                                                          |                                                                     |           |      |      |       |            |               |        |       |
| 35     | Char Livelihood Program (CLP)                                                        |                                                                     |           |      |      |       |            |               |        |       |
| 36     | Shouhardo Program (CARE)                                                             |                                                                     |           |      |      |       |            |               |        |       |
| 46     | Nabajibon Program (Save the Children)                                                |                                                                     |           |      |      |       |            |               |        |       |
| 45     | Proshar Program (ACDI VOCA)                                                          |                                                                     |           |      |      |       |            |               |        |       |
| 37     | Accommodation (Poverty Alleviation & Rehabilitation) Project (Chief Advisors Office) |                                                                     |           |      |      |       |            |               |        |       |
| 38     | Housing Support                                                                      |                                                                     |           |      |      |       |            |               |        |       |
| 39     | TUP (BRAC)                                                                           |                                                                     |           |      |      |       |            |               |        |       |
| 40     | One House one farm                                                                   |                                                                     |           |      |      |       |            |               |        |       |
| 43     | TMRI                                                                                 |                                                                     |           |      |      |       |            |               |        |       |
| 48     | Pension program for retired government employees and their families                  |                                                                     |           |      |      |       |            |               |        |       |
| 50     | Program for improving the living standards of tea garden workers                     |                                                                     |           |      |      |       |            |               |        |       |
| 51     | Climate Rehabilitation Program (Gucchograam)                                         |                                                                     |           |      |      |       |            |               |        |       |
| 52     | Social Security Policy Support (SSSS) Program                                        |                                                                     |           |      |      |       |            |               |        |       |
| 44     | Other (please specify)                                                               |                                                                     |           |      |      |       |            |               |        |       |

Module End Time: 

|      |  |  |        |  |  |
|------|--|--|--------|--|--|
| Hour |  |  | Minute |  |  |
|------|--|--|--------|--|--|



Household Number:

**Code1:Subsidy Code**

|                |                       |                                          |
|----------------|-----------------------|------------------------------------------|
| Cow..... 1     | Latrine..... 4        | Others1 ..... 7                          |
| Goat..... 2    | Tin ..... 5           | Others2 ..... 8                          |
| Chicken..... 3 | Rickshaw/Cart ..... 6 | Others3 ..... 9                          |
|                |                       | Did not receive any in-kind goods.....10 |

**Module Ua: Program Participation in Food Friendly Program (Khaddo Bandhob / TK 10/kg Rice Program) (Male)**

Module start time: Hour   Minu   Respondent ID:  Consent :  Yes...1  
No....2

| Question Number | Questions                                                             | Response                                                                                                             | Code                                                                                                                                                                                                                                                                                                                                                                               |
|-----------------|-----------------------------------------------------------------------|----------------------------------------------------------------------------------------------------------------------|------------------------------------------------------------------------------------------------------------------------------------------------------------------------------------------------------------------------------------------------------------------------------------------------------------------------------------------------------------------------------------|
| Ua_01           | Do you know about Khaddo Bandhob / TK 10 per kg program rice program? | <input type="text"/>                                                                                                 | Yes ..... 1<br>No..... 2>> Ua_03                                                                                                                                                                                                                                                                                                                                                   |
| Ua_02           | How did you know about the program?                                   | <input type="text"/><br><input type="text"/><br><input type="text"/><br><input type="text"/><br><input type="text"/> | From UP Chairman.....1<br>From UP member.....2<br>From NGO worker.....3<br>From school teacher.....4<br>Courtyard meetings/ from radio.....5<br>From TV.....6<br>News papers.....7<br>From friends/neighbors.....8<br>Village Campaign.....9<br>Sms from government.....10<br>Recorded calls from GOB/NGO.....11<br>SAAO.....12<br>Village Police.....13<br>Other (specify).....14 |
| Ua_03           | Are you/have you been a beneficiary?                                  | <input type="text"/>                                                                                                 | Yes ..... 1<br>No..... 2>> Next Module                                                                                                                                                                                                                                                                                                                                             |

Household Number:

| Question Number | Questions                                                                                                                                                          | Response                                                                                                       | Code                                                                                                                                                                                                                                                                                                                                                                                                |
|-----------------|--------------------------------------------------------------------------------------------------------------------------------------------------------------------|----------------------------------------------------------------------------------------------------------------|-----------------------------------------------------------------------------------------------------------------------------------------------------------------------------------------------------------------------------------------------------------------------------------------------------------------------------------------------------------------------------------------------------|
| Ua_04           | How did you get selected into the program?                                                                                                                         | <input type="text"/>                                                                                           | Did not apply but UP selected me.....1<br>Did not apply but NGO selected me.....2<br>I applied, and UP selected me .....3<br>I applied, and NGO selected me.....4<br>Does not know who selected.....5<br>Other member of the program supported me.....6<br>Paid money for getting selected.....7<br>Husband/other family members assisted.....8<br>I pursued.....9<br>Other (please specify).....10 |
| Ua_05           | Do you know in which months of the year the program is effective?                                                                                                  | <input type="text"/>                                                                                           | Yes .....1<br>No.....2                                                                                                                                                                                                                                                                                                                                                                              |
| Ua_06           | If yes, state the months.                                                                                                                                          | <input type="text"/> <input type="text"/><br><input type="text"/> <input type="text"/><br><input type="text"/> | January.....1<br>February.....2<br>.....<br>December.....12                                                                                                                                                                                                                                                                                                                                         |
| Ua_07           | <i>Enumerator: Verify the answer is correct [September, October, November, March, April]</i><br><i>Note: Verify if answer is different from the correct months</i> | <input type="text"/>                                                                                           | Correct.....1<br>Incorrect.....2                                                                                                                                                                                                                                                                                                                                                                    |
| Ua_08           | When did you get enlisted in the program (month and year)?                                                                                                         | Year      Month<br><input type="text"/> <input type="text"/>                                                   |                                                                                                                                                                                                                                                                                                                                                                                                     |
| Ua_09           | When did you first avail this program (month and year)?                                                                                                            | Year      Month<br><input type="text"/> <input type="text"/>                                                   |                                                                                                                                                                                                                                                                                                                                                                                                     |

Household Number:

| Question Number | Questions                                                                    | Response             | Code                                                                                                                                                                 |
|-----------------|------------------------------------------------------------------------------|----------------------|----------------------------------------------------------------------------------------------------------------------------------------------------------------------|
| Ua_10           | Do you know the maximum limit on the amount of rice you can buy per month?   | <input type="text"/> | Yes ..... 1<br>No.....2                                                                                                                                              |
| Ua_11           | If yes, state the maximum limit on the amount of rice you can buy per month. | <input type="text"/> | Kilograms/Month                                                                                                                                                      |
| Ua_12           | Where do you buy the rice from?                                              | <input type="text"/> | Ration dealer.....1<br>Upazila Office.....2<br>UP office.....3<br>School.....4<br>NGO office.....5<br>Any other fixed place (specify).....6<br>Other (specify).....7 |
| Ua_13           | Did you purchase rice in the months of March/April 2018?                     | <input type="text"/> | Yes ..... 1<br>No.....2 >> Ua_17                                                                                                                                     |
| Ua_14           | How much rice did you buy in this period?                                    | <input type="text"/> | Kilograms                                                                                                                                                            |
| Ua_15           | How much did you pay per kilogram for the rice you bought?                   | <input type="text"/> | TK/kg                                                                                                                                                                |
| Ua_16           | How many times did you buy rice in that period?                              | <input type="text"/> | Number of times                                                                                                                                                      |
| Ua_17           | Did you purchase rice in the months of September-November 2018?              | <input type="text"/> | Yes ..... 1<br>No.....2 >> Ua_21                                                                                                                                     |
| Ua_18           | How much rice did you buy in this period?                                    | <input type="text"/> | Kilograms                                                                                                                                                            |
| Ua_19           | How much did you pay per kilogram for the rice you bought?                   | <input type="text"/> | TK/kg                                                                                                                                                                |
| Ua_20           | How many times did you buy rice in that period?                              | <input type="text"/> | Number of times                                                                                                                                                      |

Household Number:

| Question Number | Questions                                                                                    | Response                                                             | Code                                                                                                                                                                                                                 |
|-----------------|----------------------------------------------------------------------------------------------|----------------------------------------------------------------------|----------------------------------------------------------------------------------------------------------------------------------------------------------------------------------------------------------------------|
| Ua_21           | What was the quality of rice you bought?                                                     | <input type="text"/>                                                 | Very Good.....1<br>Good.....2<br>Not so good.....3<br>Bad.....4<br>Very bad.....5<br>Not suitable for human consumption.....6                                                                                        |
| Ua_22           | If answer is 4 to 6, what were the problems?                                                 | <input type="text"/><br><input type="text"/><br><input type="text"/> | Had dust/other particles.....1<br>Pest infested.....2<br>Bad smell.....3<br>Other (specify).....4                                                                                                                    |
| Ua_23           | What type of problems did you face when you went to purchase the rice?                       | <input type="text"/><br><input type="text"/><br><input type="text"/> | Had to wait in the line for a long time.....1<br>Distance from home to distribution center is very far.....2<br>Had to pay bribe to the seller.....3<br>There were no problems.....4<br>Other (please specify).....5 |
| Ua_24           | Did you sell any portion of the rice?                                                        | <input type="text"/>                                                 | Yes ..... 1<br>No.....2                                                                                                                                                                                              |
| Ua_25           | If yes, how much rice did you sell?                                                          | <input type="text"/>                                                 | Kilograms                                                                                                                                                                                                            |
| Ua_26           | What was the selling price per kilogram?                                                     | <input type="text"/>                                                 | Taka/kg                                                                                                                                                                                                              |
| Ua_27           | <i>Enumerator: Ask the beneficiary to show her/his card for the program. Record outcome.</i> | <input type="text"/>                                                 | Showed her/his card.....1<br>Could not show.....2                                                                                                                                                                    |

Household Number:

| Question Number | Questions                                                      | Response             | Code                                                                                                                                                                                                            |
|-----------------|----------------------------------------------------------------|----------------------|-----------------------------------------------------------------------------------------------------------------------------------------------------------------------------------------------------------------|
| Ua_28           | <i>Enumerator: If she/he could not show the card, ask why.</i> | <input type="text"/> | Did not receive card yet.....1<br>Sold the card to somebody else.....2<br>UP chairman/member kept it in their custody.....3<br>NGO kept it.....4<br>Lost the card/cannot find it.....5<br>Other (specify).....6 |

Module End Time:  Hour   Minute

Household Number:

Module Start Time: Hour   Minute

Respondant ID:  Respondant's Consent:  Yes..... 1  
No..... 2

**Module V: Migration, Remittances, Transfers and Other Income (Male)**

**Module V1: Profile of Current Migrants (Domestic and International) (Male)**

|              |                                                                                                                                                                                                  |                                    |
|--------------|--------------------------------------------------------------------------------------------------------------------------------------------------------------------------------------------------|------------------------------------|
| <b>V1_01</b> | Has anyone, who was a member of your household in the last midline survey/ 2015, currently a migrant (living away for 6 months or more) within the country (but not in same upazilla) or abroad? | Yes ..... 1<br>No ..... 2 >> V2_01 |
|--------------|--------------------------------------------------------------------------------------------------------------------------------------------------------------------------------------------------|------------------------------------|

Report for all current migrants of the household. Use separate rows for each person.

| Person ID | Was a member of the household in midline | Name | Relation to household head | When did (name) migrate? |       |               | Sex<br>Male ...1<br>Female.2 | Education | Occupation<br><br>Use Code 3 from Module C | Which country is s/he in now?<br><br>Within Bangladesh...1<br>Abroad...2 >> V1_11 | If in-country, write zila code. | If abroad, write country code. | Who helped in the migration process?<br>If response is 1 or 4 >> V1_12 | If Code 8 is 2 or 3, which division is this agent located? | For what purpose did the member initially migrate? | How was the migration expenses paid? | Does the migrant send remittance home on a regularly (at least once in the last 12 months)?<br><br>Yes...1<br>No....2 |
|-----------|------------------------------------------|------|----------------------------|--------------------------|-------|---------------|------------------------------|-----------|--------------------------------------------|-----------------------------------------------------------------------------------|---------------------------------|--------------------------------|------------------------------------------------------------------------|------------------------------------------------------------|----------------------------------------------------|--------------------------------------|-----------------------------------------------------------------------------------------------------------------------|
|           |                                          |      |                            | Year                     | Month | Complete year |                              |           |                                            |                                                                                   |                                 |                                |                                                                        |                                                            |                                                    |                                      |                                                                                                                       |
| PID       | MID                                      | Name | V1_02                      | V1_0                     | V1_0  | V1_05         | V1_0                         | V1_0      | V1_08                                      | V1_09                                                                             | V1_10                           | V1_11                          | V1_15                                                                  | V1_16                                                      | V1_12                                              | V1_13                                | V1_14                                                                                                                 |
| 81        |                                          |      |                            |                          |       |               |                              |           |                                            |                                                                                   |                                 |                                |                                                                        |                                                            |                                                    |                                      |                                                                                                                       |
| 82        |                                          |      |                            |                          |       |               |                              |           |                                            |                                                                                   |                                 |                                |                                                                        |                                                            |                                                    |                                      |                                                                                                                       |
| 83        |                                          |      |                            |                          |       |               |                              |           |                                            |                                                                                   |                                 |                                |                                                                        |                                                            |                                                    |                                      |                                                                                                                       |
| 84        |                                          |      |                            |                          |       |               |                              |           |                                            |                                                                                   |                                 |                                |                                                                        |                                                            |                                                    |                                      |                                                                                                                       |
| 85        |                                          |      |                            |                          |       |               |                              |           |                                            |                                                                                   |                                 |                                |                                                                        |                                                            |                                                    |                                      |                                                                                                                       |
| 86        |                                          |      |                            |                          |       |               |                              |           |                                            |                                                                                   |                                 |                                |                                                                        |                                                            |                                                    |                                      |                                                                                                                       |

Household Number:

| Code 1: Relationship                                       | Code 2: Education                                                       | Code 4: District /Zilla |                    |                     |
|------------------------------------------------------------|-------------------------------------------------------------------------|-------------------------|--------------------|---------------------|
| <b>Relationship with primary respondent</b>                | Never attended school.....99                                            | Dhaka ..... 1           | Comilla.....25     | Lalmonirhat.....49  |
| Primary respondent.....1                                   | Reads in class I .....0                                                 | Gazipur.....2           | Feni .....26       | Nilphamari .....50  |
| Primary respondent Husband/wife 2                          | Completed class I.....1                                                 | Manikganj .....3        | Lakshimpur .....27 | Rangpur .....51     |
| Son/daughter .....3                                        | Completed class II .....2                                               | Munshiganj .....4       | Noakhali .....28   | Dinajpur .....52    |
| Daughter/son -in-law .....4                                | Completed class III .....3                                              | Narayanganj .....5      | Khulna .....29     | Thakurgaon .....53  |
| Grandson/daughter.....5                                    | Completed class IV .....4                                               | Narsingdi.....6         | Jessore .....30    | Panchagarh.....54   |
| Father/mother.....6                                        | Completed class V .....5                                                | Faridpur.....7          | Jhenaidah.....31   | Sylhet .....55      |
| Brother/sister .....7                                      | Completed class VI.....6                                                | Gopalganj .....8        | Magura .....32     | Hobiganj.....56     |
| Niece/Nephew .....8                                        | Completed class VII .....7                                              | Madaripur.....9         | Narail.....33      | Moulvibazar .....57 |
| Primary respondent's cousin...9                            | Completed class VIII .....8                                             | Rajbari.....10          | Bagerhat .....34   | Sunamganj.....58    |
|                                                            | Completed class IX.....9                                                | Shariatpur .....11      | Satkhira .....35   | Barishal .....59    |
| <b>Relationship with primary respondent's husband/wife</b> | Completed Secondary School/Dakhil .....10                               | Jamalpur .....12        | Chuadanga.....36   | Bhola.....60        |
| Father-in-law/mother-in-law...10                           | Higher secondary (1 <sup>st</sup> year).....11                          | Sherpur .....13         | Kushtia .....37    | Jhalakathi .....61  |
| Brother/Sister-in-law .....11                              | Completed Higher Secondary/Alim 12 Degree (1 <sup>st</sup> year).....13 | Kishoreganj .....14     | Meherpur .....38   | Pirojpur .....62    |
| Husband/wife's niece/nephew 12                             | BA/BSC pass/Fazil .....14                                               | Mymensing .....15       | Rajshahi.....39    | Barguna .....63     |
| Primary respondent's husband/wife's cousin .....13         | BA/BSC honors/Fazil .....15                                             | Netrokona.....16        | Noagaon .....40    | Patuakhali.....64   |
| <b>Other relative/non relative</b>                         | MA/MSC and above/Kamil ...16                                            | Tangail .....17         | Nawabganj .....41  |                     |
| Other relative .....14                                     | SSC Candidate .....22                                                   | Chittagong.....18       | Natore.....42      |                     |
| Household help .....15                                     | HSC Candidate .....33                                                   | Cox's bazar .....19     | Pabna.....43       |                     |
| Other Non relative/friends .....16                         | Preschool class (general) .....66                                       | Bandarban .....20       | Sirajganj .....44  |                     |
|                                                            | Preschool (mosque based) .....67                                        | Khagrachhari.....21     | Bogra.....45       |                     |
|                                                            | Medical/MBBS .....71                                                    | Rangamati .....22       | Joypurhat.....46   |                     |
|                                                            | Nursing .....72                                                         | Brahmanbaria.....23     | Gaibanda .....47   |                     |
|                                                            | Engineer .....73                                                        | Chandpur.....24         | Kurigram .....48   |                     |
|                                                            | Diploma Engineer.....74                                                 |                         |                    |                     |
|                                                            | Vocational/Technical Education 75                                       |                         |                    |                     |
|                                                            | Other (specify).....76                                                  |                         |                    |                     |

Household Number:

| Code 5: Country                           |                     |                        | Code 6: Primary reason for migration | Code 7: How was the migration expenses paid                      |
|-------------------------------------------|---------------------|------------------------|--------------------------------------|------------------------------------------------------------------|
| Australia .....1                          | Jordan.....15       | Saudi Arabia..... 29   | Employment ..... 1                   | Migrating member paid all expenses ..... 1                       |
| Bahrain .....2                            | Kuwait .....16      | Singapore ..... 30     | Education .....2                     | All expenses were paid from common household resources ..... 2   |
| Brunei .....3                             | Laos .....17        | South Africa ..... 31  | Marriage .....3                      | Received money from friends/relatives ..... 3                    |
| Canada .....4                             | Liberia.....18      | Spain ..... 32         | Health care .....4                   | Borrowed money from friends and relatives ..... 4                |
| Cyprus.....5                              | Libya.....19        | Sweden ..... 33        | Medical Treatment.....5              | Borrowed money from commercial lender ..... 5                    |
| Federation of Russia .....6               | Malaysia.....20     | Switzerland ..... 34   | Escape war/ violence .....6          | Made arrangement with employment agency/foreign employer ..... 6 |
| France .....7                             | Maldives .....21    | Taiwan ..... 35        | Drought/Famine/Disease/Etc. 7        | Mortgaged land ..... 7                                           |
| Germany .....8                            | Mauritius.....22    | Turkey ..... 36        | Business/self-appointed work 8       | Sold own land or other assets ..... 8                            |
| Greece.....9                              | New Zealand.....23  | U.S.A..... 37          | Other (specify) .....9               | I do not know..... 9                                             |
| India .....10                             | Oman .....24        | UAE ..... 38           |                                      | Others (Specify) ..... 10                                        |
| Iran .....11                              | Pakistan .....25    | U.K..... 39            |                                      |                                                                  |
| Iraq .....12                              | Poland .....26      | Yemen ..... 40         |                                      |                                                                  |
| Italy .....13                             | Qatar .....27       | Other(specify) .... 41 |                                      |                                                                  |
| Japan.....14                              | South Korea .....28 |                        |                                      |                                                                  |
| <b>Code8</b>                              | <b>Code9</b>        |                        |                                      |                                                                  |
| Friends/family in the migrated location 1 | Dhaka.....1         |                        |                                      |                                                                  |
| Agent in Bangladesh.....2                 | Chittagong .....2   |                        |                                      |                                                                  |
| Both .....3                               | Rajshahi .....3     |                        |                                      |                                                                  |
| Others (specify).....4                    | Khulna .....4       |                        |                                      |                                                                  |
|                                           | Barisal.....5       |                        |                                      |                                                                  |
|                                           | Sylhet .....6       |                        |                                      |                                                                  |
|                                           | Rangpur .....7      |                        |                                      |                                                                  |



Household Number:

**Module V2: Remittance in (Male)**

|              |                                                                                                                                        |                      |                                     |
|--------------|----------------------------------------------------------------------------------------------------------------------------------------|----------------------|-------------------------------------|
| <b>V2_01</b> | During the past 12 months, have you or any member of household received any money from any person who does not live in your household? | <input type="text"/> | Yes.....1>>V2_02<br>No.....2>>V3_01 |
|--------------|----------------------------------------------------------------------------------------------------------------------------------------|----------------------|-------------------------------------|

Report for remittances received from migrants of the household and any other remitter.

Use PID 81-89 for migrants who were household members in the last 5 years. Use PID 91-99 for remitters who were never household members.

| Person ID | Was a member of the household in midline | What is the relationship of the remitter to the household head? | Where does the remitter currently live? |                                 | In the past 12 months                                 |                                                     |                                                      | Which expenditure, saving, and investment, would have been CUT had the remittance from this source not been received? | Did the person who sent the money put any condition on items the money was to be spent on?<br><br>Yes...1<br>No....2>>V2_11 | What items were these? | Who was the remittance sent to? |        |        |        |        |
|-----------|------------------------------------------|-----------------------------------------------------------------|-----------------------------------------|---------------------------------|-------------------------------------------------------|-----------------------------------------------------|------------------------------------------------------|-----------------------------------------------------------------------------------------------------------------------|-----------------------------------------------------------------------------------------------------------------------------|------------------------|---------------------------------|--------|--------|--------|--------|
|           |                                          |                                                                 | District (if within Bangladesh)         | Country (if outside Bangladesh) | How many times have you received remittance payments? | How much money in total did your household receive? | How was the remittance sent? (Report primary method) |                                                                                                                       |                                                                                                                             |                        |                                 |        |        |        |        |
|           | Member ID                                | Code 1                                                          | Code 4                                  | Code 5                          | number                                                | Tk                                                  | Code 8                                               | Code11                                                                                                                |                                                                                                                             |                        | Code                            | Code11 |        |        | Code12 |
| PID       | MID                                      | V2_02                                                           | V2_03                                   | V2_04                           | V2_05                                                 | V2_06                                               | V2_07                                                | V2_08a                                                                                                                | V2_08b                                                                                                                      | V2_08c                 | V2_09                           | V2_10a | V2_10b | V2_10c | V2_11  |
|           |                                          |                                                                 |                                         |                                 |                                                       |                                                     |                                                      |                                                                                                                       |                                                                                                                             |                        |                                 |        |        |        |        |
|           |                                          |                                                                 |                                         |                                 |                                                       |                                                     |                                                      |                                                                                                                       |                                                                                                                             |                        |                                 |        |        |        |        |
|           |                                          |                                                                 |                                         |                                 |                                                       |                                                     |                                                      |                                                                                                                       |                                                                                                                             |                        |                                 |        |        |        |        |
|           |                                          |                                                                 |                                         |                                 |                                                       |                                                     |                                                      |                                                                                                                       |                                                                                                                             |                        |                                 |        |        |        |        |
|           |                                          |                                                                 |                                         |                                 |                                                       |                                                     |                                                      |                                                                                                                       |                                                                                                                             |                        |                                 |        |        |        |        |
|           |                                          |                                                                 |                                         |                                 |                                                       |                                                     |                                                      |                                                                                                                       |                                                                                                                             |                        |                                 |        |        |        |        |

Household Number:

| Code 10: How was the remittance sent          | Code 11: Applicable for V2_08 & V2_10     | Code12 :Who was the remittance sent to |
|-----------------------------------------------|-------------------------------------------|----------------------------------------|
| Personal delivery by family, friends ..... 1  | Cash savings ..... 1                      | For female member ..... 1              |
| Remittance company (i.e. Western Union) 2     | Education ..... 2                         | For male member ..... 2                |
| Transfer to your own bank account ..... 3     | Health (Hospital/Doctor/Medicine) ..... 3 | All members of the household..... 3    |
| Transfer to someone else's bank account 4     | Consumption (food, cloths) ..... 4        |                                        |
| Cheque / Bank draft ..... 5                   | Build house/land /renovate house ..... 5  |                                        |
| Money order ..... 6                           | Purchase of vehicle ..... 6               |                                        |
| TT (telephonic/telegraphic transfer ) ..... 7 | Purchase consumer durables ..... 7        |                                        |
| Hundi/Hawala ..... 8                          | Investment in agr. or business..... 8     |                                        |
| Mobile Banking ..... 10                       | Purchase of gold and other jewelry..... 9 |                                        |
| Other (Specify) ..... 9                       | Livestock purchase ..... 10               |                                        |
|                                               | Purchase shares/stock/bonds..... 11       |                                        |
|                                               | Other (Specify) ..... 12                  |                                        |

| SL    | Questions                                                                                                                                                           | Response                                                             | Response Code                     |                                                     |                                                                  |
|-------|---------------------------------------------------------------------------------------------------------------------------------------------------------------------|----------------------------------------------------------------------|-----------------------------------|-----------------------------------------------------|------------------------------------------------------------------|
| V2_12 | In the last 12 months, what was the remittance from abroad used for?<br><br>According to the amount of money spent, record the three primary expenses               | <input type="text"/><br><input type="text"/><br><input type="text"/> | Not applicable..... 1             | Traveling abroad..... 11                            | Charity(except Jakat) ..... 21                                   |
|       |                                                                                                                                                                     |                                                                      | Savings ..... 2                   | Building/purchasing house ..... 12                  | Jakat ..... 22                                                   |
|       |                                                                                                                                                                     |                                                                      | Repay loan ..... 3                | Repair/develop house ..... 13                       | For religious institutions (mosque, madrasa, orphanage) ..... 23 |
|       |                                                                                                                                                                     |                                                                      | Buying productive assets ..... 4  | House rent..... 14                                  | Investment in business institutions ..... 24                     |
|       |                                                                                                                                                                     |                                                                      | Agricultural equipment purchase 5 | Purchase furniture..... 15                          | ..... 24                                                         |
|       |                                                                                                                                                                     |                                                                      | Purchase land ..... 6             | Electronics ..... 16                                | Primary education for male..... 25                               |
|       |                                                                                                                                                                     |                                                                      | Treatment..... 7                  | Vehicle purchase..... 17                            | Primary education for female .. 26                               |
| V2_13 | In the last 12 months, what purpose was the remittance within Bangladesh used for?<br><br>According to the amount of money spent, record the three primary expenses | <input type="text"/><br><input type="text"/><br><input type="text"/> | Household commodity purchase. 8   | Giving loan ..... 18                                | Secondary education for male.. 27                                |
|       |                                                                                                                                                                     |                                                                      | Education expenses..... 9         | Dowry ..... 19                                      | Secondary education for female ..... 28                          |
|       |                                                                                                                                                                     |                                                                      | Wedding expenses ..... 10         | Non-agricultural productive asset purchase ..... 20 | Others (specify) ..... 29                                        |

Household Number:

**Module V3: Remittance out (Male)**

Report for remittances received from migrants of the household and any other remitter

|              |                                                                                                                               |                      |                                         |
|--------------|-------------------------------------------------------------------------------------------------------------------------------|----------------------|-----------------------------------------|
| <b>V3_01</b> | During the past 12 months, did you or any member of your household send money to someone who does not live in your household? | <input type="text"/> | Yes ..... 1<br>No ..... 2>>>Next Module |
|--------------|-------------------------------------------------------------------------------------------------------------------------------|----------------------|-----------------------------------------|

| SI No. | What is the relationship of the recipient to the household head? | Where does the recipient currently live? |                                 | In the past 12 months                             |                                                  |                                                         |
|--------|------------------------------------------------------------------|------------------------------------------|---------------------------------|---------------------------------------------------|--------------------------------------------------|---------------------------------------------------------|
|        |                                                                  | District (if within Bangladesh)          | Country (if outside Bangladesh) | How many times have you send remittance payments? | How much money in total did your household send? | How was the remittance sent?<br>(Report primary method) |
|        | Code 1                                                           | Code 4                                   | Code 5                          | Number                                            | Tk                                               | Code 13                                                 |
| SI No. | V3_02                                                            | V3_03                                    | V3_04                           | V3_05                                             | V3_06                                            | V3_07                                                   |
|        |                                                                  |                                          |                                 |                                                   |                                                  |                                                         |
|        |                                                                  |                                          |                                 |                                                   |                                                  |                                                         |
|        |                                                                  |                                          |                                 |                                                   |                                                  |                                                         |
|        |                                                                  |                                          |                                 |                                                   |                                                  |                                                         |

- Code 13: How was the remittance sent?**
- Personal delivery by family, friends .....1
  - Remittance company (i.e. Western Union) .....2
  - Transfer to your own bank account.....3
  - Transfer to someone else's bank account .....4
  - Cheque / Bank draft .....5
  - Money order.....6
  - TT (telephonic/telegraphic transfer) .....7
  - Hundi/Hawala .....8
  - Mobile Banking .....10
  - Other (specify) .....9

Household Number:    **Module V4: Other Income household (Male)**

Report for the last 12 months:

| Question number | Question                                                  | Response             | Response code        |
|-----------------|-----------------------------------------------------------|----------------------|----------------------|
| V4_01           | Income received from land rent                            | <input type="text"/> | Taka/year            |
| V4_02           | Income received from rent of other property               | <input type="text"/> | Taka/year            |
| V4_03           | Income received from life and non-life insurance          | <input type="text"/> | Taka/year            |
| V4_04           | Profits and dividends received as partner/share holder    | <input type="text"/> | Taka/year            |
| V4_05           | Gratuity, separation payment, retirement benefit received | <input type="text"/> | Taka/year            |
| V4_06           | Lottery, prizes, and similar income received (in cash)    | <input type="text"/> | Taka/year            |
| V4_07           | Lottery, prizes, and similar income received (in kind)    | <input type="text"/> | Report imputed value |
| V4_08           | Charity and other assistance (in cash)                    | <input type="text"/> | Taka/year            |
| V4_09           | Charity and other assistance (in kind)                    | <input type="text"/> | Report imputed value |
| V4_10           | Interests received (from bank and other sources)          | <input type="text"/> | Taka/year            |
| V4_11           | Other cash receipts (not included elsewhere)              | <input type="text"/> | Taka/year            |
| V4_12           | Other in-kind receipts (not included elsewhere)           | <input type="text"/> | Report imputed value |

Module End Time:

|      |                      |                      |        |                      |                      |
|------|----------------------|----------------------|--------|----------------------|----------------------|
| Hour | <input type="text"/> | <input type="text"/> | Minute | <input type="text"/> | <input type="text"/> |
|------|----------------------|----------------------|--------|----------------------|----------------------|

Household Number:

**Module W: Anthropometry, Health and Illness (Female)**

**Module W1: Anthropometry (Female)**

Measure for all household members ≥ 5 years.

Module start time: Hour   Minu   Respondent ID:  Consent :  Yes ...1  
No.....2

|              | Member ID  | Name        | Are you pregnant? | Are you lactating? | Weight                                                   | Height                                                   | If not measured, why?                                                                                           | Blood pressure measurement for all members aged 12 years and above |                               |
|--------------|------------|-------------|-------------------|--------------------|----------------------------------------------------------|----------------------------------------------------------|-----------------------------------------------------------------------------------------------------------------|--------------------------------------------------------------------|-------------------------------|
|              |            |             | Yes 1<br>No 2     | Yes 1<br>No 2      |                                                          |                                                          |                                                                                                                 | Systolic/<br>Upper<br>(mmHg)                                       | Diastolic/<br>Lower<br>(mmHg) |
|              |            |             | Code ↑            | Code ↑             | (kg)<br><br>(Mark height and weight '-' if not measured) | (cm)<br><br>(Mark height and weight '-' if not measured) | Have measured.....1<br>Absent.....2<br>Sick.....3<br>Refused to give measurement.....4<br>Other (specify).....5 |                                                                    |                               |
|              | <b>MID</b> | <b>Name</b> | <b>W1_01</b>      | <b>W1_02</b>       | <b>W1_03</b>                                             | <b>W1_04</b>                                             | <b>W1_05</b>                                                                                                    | <b>W1_34</b>                                                       | <b>W1_35</b>                  |
| <b>Women</b> |            |             |                   |                    |                                                          |                                                          |                                                                                                                 |                                                                    |                               |
|              |            |             |                   |                    |                                                          |                                                          |                                                                                                                 |                                                                    |                               |
|              |            |             |                   |                    |                                                          |                                                          |                                                                                                                 |                                                                    |                               |
| <b>Men</b>   |            |             |                   |                    |                                                          |                                                          |                                                                                                                 |                                                                    |                               |
|              |            |             |                   |                    |                                                          |                                                          |                                                                                                                 |                                                                    |                               |
|              |            |             |                   |                    |                                                          |                                                          |                                                                                                                 |                                                                    |                               |
|              |            |             |                   |                    |                                                          |                                                          |                                                                                                                 |                                                                    |                               |

Household Number:

**Module W1: (Continues) Menstrual hygiene practices and knowledge among adolescent girls and women between the ages of 10 and 50 years**

|                                                                                                                 |                                                                                                                                                                    |                                                                                                                                            |                                                                                                                                                   |                                                              |                                                                                                                                                                                                                 |                                                                                                                                          |                                                                                      |                                                                                                                           |                                                                                     |                                                               |                                                                                             |                                                                                                                                                                         |
|-----------------------------------------------------------------------------------------------------------------|--------------------------------------------------------------------------------------------------------------------------------------------------------------------|--------------------------------------------------------------------------------------------------------------------------------------------|---------------------------------------------------------------------------------------------------------------------------------------------------|--------------------------------------------------------------|-----------------------------------------------------------------------------------------------------------------------------------------------------------------------------------------------------------------|------------------------------------------------------------------------------------------------------------------------------------------|--------------------------------------------------------------------------------------|---------------------------------------------------------------------------------------------------------------------------|-------------------------------------------------------------------------------------|---------------------------------------------------------------|---------------------------------------------------------------------------------------------|-------------------------------------------------------------------------------------------------------------------------------------------------------------------------|
| Do you have your menstruation?<br><br>Yes ..... 1<br>No ..... 2<br>Never menstruated... 3 >>skip to next module | What was your age during your first menstruation?<br>(If the response to W1_06 is 2, then record the age and skip to W1_14)<br><br>(Age when menstruation started) | What kind of sanitary napkin/pad do you use during menstruation?<br><br>(If response is 3, skip to W1_15; If response is 6, skip to W1_16) | How often do you purchase sanitary napkins/pads?<br><br>Every month...1<br>Buy together for couple of months...2<br>Not applicable .....3>> W1_15 | How much do you spend on this product every month?<br><br>Tk | What is your relationship with the person who buys sanitary napkins/pads for you?<br><br>Self...1<br>Husband...2<br>Mother...3<br>Sister...4<br>Father...5<br>Brother...6<br>Other female...7<br>Other male...8 | How many times do you change pads/cloth in one day on average?<br><br>Less than 2 times...1<br>2 to 3 times...2<br>More than 3 times...3 | If the answer to W1_08 is 3 and above:<br><br>Why don't you use sanitary pad/tampon? | If use reusable cloth, what do you wash it with?<br><br>Only water...1<br>Soap and water...2<br>Not applicable...3>>W1_19 | Where do you dry the cloth?<br><br>Indoors...1<br>Sunlight...2<br>Not applicabl...3 | How do you dispose the sanitary napkin/pad/cotton/cloth etc.? | What type of problems did you face during menstruation?<br><br>Monsoon season<br>Dry season | For how many days do you have blood flow during menstruation?<br><br>Codes:<br>1 to 2 days...1<br>3 to 4 days...2<br>5 to 7 days...3<br>7 to 10 days...4<br>>10days...5 |
| Code ↑                                                                                                          | years                                                                                                                                                              | Code 1                                                                                                                                     | Code ↑                                                                                                                                            | Taka                                                         | Code ↑                                                                                                                                                                                                          | Code ↑                                                                                                                                   | Code 2                                                                               | Code ↑                                                                                                                    | Code ↑                                                                              | Code 3                                                        | Code 4                                                                                      | Code ↑                                                                                                                                                                  |
| W1_06                                                                                                           | W1_07                                                                                                                                                              | W1_08                                                                                                                                      | W1_09                                                                                                                                             | W1_10                                                        | W1_11                                                                                                                                                                                                           | W1_15                                                                                                                                    | W1_16                                                                                | W1_17                                                                                                                     | W1_18                                                                               | W1_19                                                         | W1_12<br>W1_13                                                                              | W1_20                                                                                                                                                                   |
|                                                                                                                 |                                                                                                                                                                    |                                                                                                                                            |                                                                                                                                                   |                                                              |                                                                                                                                                                                                                 |                                                                                                                                          |                                                                                      |                                                                                                                           |                                                                                     |                                                               |                                                                                             |                                                                                                                                                                         |
|                                                                                                                 |                                                                                                                                                                    |                                                                                                                                            |                                                                                                                                                   |                                                              |                                                                                                                                                                                                                 |                                                                                                                                          |                                                                                      |                                                                                                                           |                                                                                     |                                                               |                                                                                             |                                                                                                                                                                         |
|                                                                                                                 |                                                                                                                                                                    |                                                                                                                                            |                                                                                                                                                   |                                                              |                                                                                                                                                                                                                 |                                                                                                                                          |                                                                                      |                                                                                                                           |                                                                                     |                                                               |                                                                                             |                                                                                                                                                                         |
|                                                                                                                 |                                                                                                                                                                    |                                                                                                                                            |                                                                                                                                                   |                                                              |                                                                                                                                                                                                                 |                                                                                                                                          |                                                                                      |                                                                                                                           |                                                                                     |                                                               |                                                                                             |                                                                                                                                                                         |
|                                                                                                                 |                                                                                                                                                                    |                                                                                                                                            |                                                                                                                                                   |                                                              |                                                                                                                                                                                                                 |                                                                                                                                          |                                                                                      |                                                                                                                           |                                                                                     |                                                               |                                                                                             |                                                                                                                                                                         |

**Module W1: (Continues) Menstrual hygiene practices and knowledge among adolescent girls and women between the ages of 10 and 50 years**

|                                                                            |                                                                  |                                                                                                       |                                                                      |                                                                                           |                                                                                                                                                            |                                                                         |                                        |                                              |                                                                                                                                                                                        |                                                                                     |                                                                                                          |                                                        |                                                                                                                                  |  |                                                                                                                                                            |
|----------------------------------------------------------------------------|------------------------------------------------------------------|-------------------------------------------------------------------------------------------------------|----------------------------------------------------------------------|-------------------------------------------------------------------------------------------|------------------------------------------------------------------------------------------------------------------------------------------------------------|-------------------------------------------------------------------------|----------------------------------------|----------------------------------------------|----------------------------------------------------------------------------------------------------------------------------------------------------------------------------------------|-------------------------------------------------------------------------------------|----------------------------------------------------------------------------------------------------------|--------------------------------------------------------|----------------------------------------------------------------------------------------------------------------------------------|--|------------------------------------------------------------------------------------------------------------------------------------------------------------|
| Quantity of blood flow:<br><br>Normal ...1<br>Excessive ...2<br>Scanty...3 | During menstruation do you bathe daily?<br><br>Yes...1<br>No...2 | What do you wash your hands with after cleaning yourself?<br><br>With water only...1<br>With soap and | Do you regularly clean your external genitalia?<br><br>Yes 1<br>No 2 | What do you clean external genital with?<br><br>With water...1<br>With soap and water...2 | Applicable for all responders:<br><br>Who answered on your behalf?<br><br>Self...1<br>Husband...2<br>Mother...3<br>Sister...4<br>Father...5<br>Brother...6 | Did you know about menstruation prior to menarche?<br><br>Yes 1<br>No 2 | Who first told you about menstruation? | Whom do you consult about menstrual hygiene? | What do you believe is the cause of menstruation?<br><br>Physiological ...1<br>Result of sin from God...2<br>Due to some disease...3<br>Do not know ...4<br>Other (please specify)...5 | <b>Ask to all females less than 19 years old</b>                                    |                                                                                                          |                                                        |                                                                                                                                  |  | Applicable for all responders:<br><br>Who answered on your behalf?<br><br>Self...1<br>Husband...2<br>Mother...3<br>Sister...4<br>Father...5<br>Brother...6 |
|                                                                            |                                                                  |                                                                                                       |                                                                      |                                                                                           |                                                                                                                                                            |                                                                         |                                        |                                              |                                                                                                                                                                                        | Do you face any of the following restrictions during menstruation (allow multiple): | Do you miss school often during menstruation?<br><br>Yes...1<br>No...2>W1_33<br>Not applicable...3>W1_14 | If response to W1_31 is 1, reasons for missing school: | If answer to W1_31 is 2, is there a proper washroom/ toilet facility to change pad/cloth or clean yourself?<br><br>Yes 1<br>No 2 |  |                                                                                                                                                            |

Household Number:

|        |        |               |        |        |                                          |        |        |        |        |            |            |            |        |        |                                          |        |
|--------|--------|---------------|--------|--------|------------------------------------------|--------|--------|--------|--------|------------|------------|------------|--------|--------|------------------------------------------|--------|
|        |        | water...<br>2 |        |        | Other<br>female...7<br>Other<br>male...8 |        |        |        |        |            |            |            |        |        | Other<br>female...7<br>Other<br>male...8 |        |
| Code ↑ | Code ↑ | Code ↑        | Code ↑ | Code ↑ | Code ↑                                   | Code ↑ | Code 5 | Code 5 | Code ↑ | Code 6     |            |            | Code ↑ | Code 7 | Code ↑                                   | Code ↑ |
| W1_21  | W1_22  | W1_23         | W1_24  | W1_25  | W1_14a                                   | W1_26  | W1_27  | W1_28  | W1_29  | W1_30<br>a | W1_30<br>b | W1_30<br>c | W1_31  | W1_32  | W1_33                                    | W1_14b |
|        |        |               |        |        |                                          |        |        |        |        |            |            |            |        |        |                                          |        |
|        |        |               |        |        |                                          |        |        |        |        |            |            |            |        |        |                                          |        |
|        |        |               |        |        |                                          |        |        |        |        |            |            |            |        |        |                                          |        |

|                                                                                                                                                                                                                                                                                            |                                                                                                                                                                                                                                                                              |                                                                                                                                                         |                                                                                                                                                                                                                                                                                                                                                                                                                                                                    |
|--------------------------------------------------------------------------------------------------------------------------------------------------------------------------------------------------------------------------------------------------------------------------------------------|------------------------------------------------------------------------------------------------------------------------------------------------------------------------------------------------------------------------------------------------------------------------------|---------------------------------------------------------------------------------------------------------------------------------------------------------|--------------------------------------------------------------------------------------------------------------------------------------------------------------------------------------------------------------------------------------------------------------------------------------------------------------------------------------------------------------------------------------------------------------------------------------------------------------------|
| <b>Code 1</b>                                                                                                                                                                                                                                                                              | <b>Code 2</b>                                                                                                                                                                                                                                                                | <b>Code 3</b>                                                                                                                                           | <b>Code 4</b>                                                                                                                                                                                                                                                                                                                                                                                                                                                      |
| Disposable commercially sold sanitary napkin/pad/tampons...1 >>W1_09<br>Disposable sanitary napkin/pad/tampons made from cotton/gauze/soft tissue...2<br>>>W1_09<br>Reusable cloth after boiling or washing...3<br>Old cloth thrown away after single use ...4<br>Other...5<br>Nothing...6 | Never heard of it...1<br>Expensive...2<br>No one is there to buy it for her...3<br>Difficult to discard...4<br>Don't feel comfortable...5                                                                                                                                    | Throw away with general waste...1<br>Burning...2<br>Dispose by burying...3<br>Not applicable...4<br>Other (please specify)...5                          | Itching (irritating skin sensation causing a desire to scratch)/scabies...1<br>Itching inside the vaginal canal...2<br>Fever/ feel feverish...3<br>Lower abdominal pain...4<br>White discharge...5<br>Bad odor discharge...6<br>Irregular menstruation...7<br>Jock itch/ crotch itch/ crotch rot (tinea cruris): fungal infection of the groin and upper thighs...8<br>Sweaty crotch/damp groin...9<br>No problem...10<br>Breast pain...12<br>Other (specify)...11 |
| <b>Code 5</b>                                                                                                                                                                                                                                                                              | <b>Code 6</b>                                                                                                                                                                                                                                                                | <b>Code 7</b>                                                                                                                                           |                                                                                                                                                                                                                                                                                                                                                                                                                                                                    |
| Mass media...1<br>Mother/older sister/elder female in the household...2<br>School teacher/curricula...3<br>Peers/friends...4<br>Other (books, health workers, relatives outside the household)...5                                                                                         | Visiting religious places/practicing prayers and rituals...1<br>Routine household work...2<br>Playing...3<br>Attending school...4<br>Going outside in general...5<br>Eating certain types of food...6<br>Separated within households...7<br>Do not face any restrictions...9 | Feel uncomfortable at school around boys...1<br>Remain sick...2<br>Heavy bleeding...3<br>No place to change pads/cloth...4<br>Forbidden by guardian...5 |                                                                                                                                                                                                                                                                                                                                                                                                                                                                    |

Module End Time: Hour   Minute

Household Number:

**Module W2: Anthropometry-Children (Female)**

Measure for all children less than 60 months old.

Module start time: Hour    Minu

Respondent ID:  Consent :

Yes ...1  
No....2

| Member ID | Name | Father's ID No.* | Mother's ID No.* | Birth order* | Child's date of birth |                                               |       |       |             |       |       | Confirmed with birth certificate or health card?<br>Yes .....1<br>No .....2 | Child's weight during birth (kg) | How was the information regarding birth weight collected?<br>From Health Card...66<br>From mother/ other hh member...77<br>Was not weighted/ Cannot remember...99 | Weight (kg) | Height (cm) | How was this child's height measured?<br>Lying down...1<br>Standing up...2 | Reason for not being measured?<br>Have measured...1<br>Absent...2<br>Sick...3<br>Refused to give measurement...4<br>Other (specify)...5 | Is this child still breast fed?<br>Yes .....1<br>No .....2 |
|-----------|------|------------------|------------------|--------------|-----------------------|-----------------------------------------------|-------|-------|-------------|-------|-------|-----------------------------------------------------------------------------|----------------------------------|-------------------------------------------------------------------------------------------------------------------------------------------------------------------|-------------|-------------|----------------------------------------------------------------------------|-----------------------------------------------------------------------------------------------------------------------------------------|------------------------------------------------------------|
|           |      |                  |                  |              | Day                   | If does not know day, what week of the month? | Month | Year  | Age (month) |       |       |                                                                             |                                  |                                                                                                                                                                   |             |             |                                                                            |                                                                                                                                         |                                                            |
| MID       | Name | W2_01a           | W2_01            | W2_13        | W2_02                 | W2_03                                         | W2_04 | W2_05 | W2_14       | W2_06 | W2_15 | W2_16                                                                       | W2_07                            | W2_08                                                                                                                                                             | W2_09       | W2_10       | W2_11                                                                      |                                                                                                                                         |                                                            |
|           |      |                  |                  |              |                       |                                               |       |       |             |       |       |                                                                             |                                  |                                                                                                                                                                   |             |             |                                                                            |                                                                                                                                         |                                                            |
|           |      |                  |                  |              |                       |                                               |       |       |             |       |       |                                                                             |                                  |                                                                                                                                                                   |             |             |                                                                            |                                                                                                                                         |                                                            |
|           |      |                  |                  |              |                       |                                               |       |       |             |       |       |                                                                             |                                  |                                                                                                                                                                   |             |             |                                                                            |                                                                                                                                         |                                                            |

\*Note for W2\_13 (birth order): Record according to the mother's pregnancy order. Do not record miscarriages that happen prior to the completion of the first 6 months, only record those that happen after 6 months (those will be considered still-birth).

\*Note: If the child's mother is not a member of the household (for example, if she is dead or lives in another household), insert 55.



Household Number:

**Module W3: Health (Female)**

*Health status questions to be asked about all household members over the age of 15.*

Respondent ID

| Member ID | Name | Can this person do the following?<br>Code 1 |              |                                      | Does this person have difficulties with: |                       |                       | Does this person have a missing or deformed limb? | Does this person suffer from any paralysis or have part of their body that has lost its sense of touch? |
|-----------|------|---------------------------------------------|--------------|--------------------------------------|------------------------------------------|-----------------------|-----------------------|---------------------------------------------------|---------------------------------------------------------------------------------------------------------|
|           |      | Stand up after sitting down                 | Walk for 5km | Walk with ½ maund rice/wheat for 20m | Hearing?<br>(Code 2)                     | Speaking?<br>(Code 3) | Eyesight?<br>(Code 4) | If yes, which one?<br>(Code 5)                    | If yes, which one?<br>(Code 5)                                                                          |
| MID       | Name | W3_01                                       | W3_02        | W3_03                                | W3_04                                    | W3_05                 | W3_06                 | W3_07                                             | W3_08                                                                                                   |
|           |      |                                             |              |                                      |                                          |                       |                       |                                                   |                                                                                                         |
|           |      |                                             |              |                                      |                                          |                       |                       |                                                   |                                                                                                         |
|           |      |                                             |              |                                      |                                          |                       |                       |                                                   |                                                                                                         |
|           |      |                                             |              |                                      |                                          |                       |                       |                                                   |                                                                                                         |
|           |      |                                             |              |                                      |                                          |                       |                       |                                                   |                                                                                                         |
|           |      |                                             |              |                                      |                                          |                       |                       |                                                   |                                                                                                         |
|           |      |                                             |              |                                      |                                          |                       |                       |                                                   |                                                                                                         |
|           |      |                                             |              |                                      |                                          |                       |                       |                                                   |                                                                                                         |
|           |      |                                             |              |                                      |                                          |                       |                       |                                                   |                                                                                                         |

|                                                                                                                                                                                                                                                                                                                                                                                                                       |                                                                                                                                                                                              |                                                                                                                                                                                                                                                                                                                                                                 |                                                                                                                                                                                                                                               |                                                                                                                                                                                                                                                                                                |
|-----------------------------------------------------------------------------------------------------------------------------------------------------------------------------------------------------------------------------------------------------------------------------------------------------------------------------------------------------------------------------------------------------------------------|----------------------------------------------------------------------------------------------------------------------------------------------------------------------------------------------|-----------------------------------------------------------------------------------------------------------------------------------------------------------------------------------------------------------------------------------------------------------------------------------------------------------------------------------------------------------------|-----------------------------------------------------------------------------------------------------------------------------------------------------------------------------------------------------------------------------------------------|------------------------------------------------------------------------------------------------------------------------------------------------------------------------------------------------------------------------------------------------------------------------------------------------|
| <p><b>Code 1: Daily activity</b></p> <p>Easily ..... 1<br/>         With a little difficulty ..... 2<br/>         With a lot of difficulty ..... 3<br/>         Not at all ..... 4</p> <p><b>Code 2: Hearing</b></p> <p>No problems ..... 1<br/>         Sometimes has difficulty ..... 2<br/>         Generally poor hearing ..... 3<br/>         Deaf in one ear ..... 4<br/>         Deaf in both ears ..... 5</p> | <p><b>Code 3: Speech</b></p> <p>No problems ..... 1<br/>         Sometimes has difficulty ..... 2<br/>         Generally has difficulty ..... 3<br/>         Cannot speak at all ..... 4</p> | <p><b>Code 4: Sight</b></p> <p>No problems ..... 1<br/>         Difficulties seeing things close ..... 2<br/>         Difficulty in seeing things far away ..... 3<br/>         Generally poor eyesight ..... 4<br/>         Cannot see at night/sees with difficulty ..... 5<br/>         Blind in one eye ..... 6<br/>         Blind in both eyes ..... 7</p> | <p><b>Code 5: Which one</b></p> <p>No / none ..... 1<br/>         Finger ..... 2<br/>         Hand ..... 3<br/>         Arm ..... 4<br/>         Toes ..... 5<br/>         Foot ..... 6<br/>         Leg ..... 7<br/>         Jaw ..... 8</p> | <p>Back ..... 9<br/>         From hips down ..... 10<br/>         From neck down ..... 11<br/>         Left side of body ..... 12<br/>         Right side of body ..... 13<br/>         Part of/ whole face ..... 14<br/>         Whole body ..... 15<br/>         Other: Specify ..... 16</p> |
|-----------------------------------------------------------------------------------------------------------------------------------------------------------------------------------------------------------------------------------------------------------------------------------------------------------------------------------------------------------------------------------------------------------------------|----------------------------------------------------------------------------------------------------------------------------------------------------------------------------------------------|-----------------------------------------------------------------------------------------------------------------------------------------------------------------------------------------------------------------------------------------------------------------------------------------------------------------------------------------------------------------|-----------------------------------------------------------------------------------------------------------------------------------------------------------------------------------------------------------------------------------------------|------------------------------------------------------------------------------------------------------------------------------------------------------------------------------------------------------------------------------------------------------------------------------------------------|

Household Number:

**Module W4: Illness (Female)**

*Questions to be asked to all household members.*

Respondent ID

| Member ID | Name | In the last four weeks, has this person suffered:<br>(Write 77 if condition has persisted for more than four weeks) |                         |                                                                                                                                                            |                                                        |                                                              |                         |                                                    |                         |                                                               |                         |                                                                   |                         |                                                                      |                         |
|-----------|------|---------------------------------------------------------------------------------------------------------------------|-------------------------|------------------------------------------------------------------------------------------------------------------------------------------------------------|--------------------------------------------------------|--------------------------------------------------------------|-------------------------|----------------------------------------------------|-------------------------|---------------------------------------------------------------|-------------------------|-------------------------------------------------------------------|-------------------------|----------------------------------------------------------------------|-------------------------|
|           |      | Any illness or injury in the last four weeks?<br><br>Yes..... 1<br>No..... 2<br>>> next row                         | How many days in total? | How many days has this person been unable to perform his/her main activity at all?<br>(Applicable only for 15 years and above. If not applicable write 99) | Significant weight loss<br><br>Yes ..... 1<br>No.....2 | Prolonged fever?<br><br>Yes ..... 1<br>No ..... 2<br>>>W4_07 | How many days in total? | Diarrhea<br><br>Yes..... 1<br>No..... 2<br>>>W4_09 | How many days in total? | Persistent cough?<br><br>Yes..... 1<br>No ..... 2<br>>> W4_11 | How many days in total? | Generalized skin rash?<br><br>Yes..... 1<br>No..... 2<br>>> W4_13 | How many days in total? | Mouth or throat infection?<br><br>Yes..... 1<br>No ..... 2>>next row | How many days in total? |
|           |      | Code ↑                                                                                                              | Days                    | Days                                                                                                                                                       | Code ↑                                                 | Code ↑                                                       | Days                    | Code ↑                                             | Days                    | Code ↑                                                        | Days                    | Code ↑                                                            | Days                    | Code ↑                                                               | Days                    |
| MID       | Name | W4_01                                                                                                               | W4_02                   | W4_03                                                                                                                                                      | W4_04                                                  | W4_05                                                        | W4_06                   | W4_07                                              | W4_08                   | W4_09                                                         | W4_10                   | W4_11                                                             | W4_12                   | W4_13                                                                | W4_14                   |
|           |      |                                                                                                                     |                         |                                                                                                                                                            |                                                        |                                                              |                         |                                                    |                         |                                                               |                         |                                                                   |                         |                                                                      |                         |
|           |      |                                                                                                                     |                         |                                                                                                                                                            |                                                        |                                                              |                         |                                                    |                         |                                                               |                         |                                                                   |                         |                                                                      |                         |
|           |      |                                                                                                                     |                         |                                                                                                                                                            |                                                        |                                                              |                         |                                                    |                         |                                                               |                         |                                                                   |                         |                                                                      |                         |
|           |      |                                                                                                                     |                         |                                                                                                                                                            |                                                        |                                                              |                         |                                                    |                         |                                                               |                         |                                                                   |                         |                                                                      |                         |

Household Number:

Respondent ID

**Module W5: Illnesses (Record for the last 4 weeks) (Female)**

Record information for any member of the household who suffered from any illness in the last 4 weeks. For every illness, fill out a new row.

| ID | Name | What are you suffering from? |        |        | How long ago did you recover? (if still sick, insert 99) | For how many days did you suffer (days) | For how many days did you have to refrain from your regular work because of the illness |
|----|------|------------------------------|--------|--------|----------------------------------------------------------|-----------------------------------------|-----------------------------------------------------------------------------------------|
|    |      | Code 1                       |        |        |                                                          |                                         |                                                                                         |
|    |      | W5_01a                       | W5_01b | W5_01c | W5_02                                                    | W5_03                                   | W5_04                                                                                   |
|    |      |                              |        |        |                                                          |                                         |                                                                                         |
|    |      |                              |        |        |                                                          |                                         |                                                                                         |
|    |      |                              |        |        |                                                          |                                         |                                                                                         |
|    |      |                              |        |        |                                                          |                                         |                                                                                         |
|    |      |                              |        |        |                                                          |                                         |                                                                                         |
|    |      |                              |        |        |                                                          |                                         |                                                                                         |
|    |      |                              |        |        |                                                          |                                         |                                                                                         |
|    |      |                              |        |        |                                                          |                                         |                                                                                         |
|    |      |                              |        |        |                                                          |                                         |                                                                                         |
|    |      |                              |        |        |                                                          |                                         |                                                                                         |

| Illness Code- 1       |                                                |                                                                 |
|-----------------------|------------------------------------------------|-----------------------------------------------------------------|
| Fever ..... 1         | Asthma ..... 17                                | Others ..... 33                                                 |
| Influenza ..... 2     | Other allergies ..... 18                       | AIDS/HIV Positive ..... 34                                      |
| Pneumonia ..... 3     | Arthritis/Gout ..... 19                        | Stroke / paralysis ..... 35                                     |
| Diarrhea ..... 4      | TB ..... 20                                    | Back pain/injury ..... 36                                       |
| Dysentery ..... 5     | Rheumatic Fever ..... 21                       | Kidney problem ..... 37                                         |
| Cholera ..... 6       | Diabetes ..... 22                              | Amnesia ..... 38                                                |
| Malaria ..... 7       | Anemia ..... 23                                | Did not suffer from any illness in the last four weeks ..... 99 |
| Typhoid ..... 8       | High Blood Pressure ..... 24                   |                                                                 |
| Jaundice ..... 9      | Heart Disease ..... 25                         |                                                                 |
| Mumps ..... 10        | Cancer/Tumor ..... 26                          |                                                                 |
| Small Pox ..... 11    | Headache ..... 27                              |                                                                 |
| Measles ..... 12      | Stomach Ache ..... 28                          |                                                                 |
| Tonsillitis ..... 13  | Eye Problem ..... 29                           |                                                                 |
| Acidity ..... 14      | Ear Problem ..... 30                           |                                                                 |
| Ulcer ..... 15        | Dental Problem ..... 31                        |                                                                 |
| Skin Disease ..... 16 | Illnesses pertaining exclusively to females 32 |                                                                 |



Household Number:

**Module X: Household Food Consumption and Food Security (Female)**

**Module X-1.1: Household Food Consumption (Recall-1)**

**(Female):**

Recall: Last 24 Hours

Module start time: 

|      |  |  |
|------|--|--|
| Hour |  |  |
|------|--|--|

|      |  |  |
|------|--|--|
| Minu |  |  |
|------|--|--|

Respondent ID:  Consent :  Yes ... 1  
No..... 2

**Note:**

First ask if yesterday was a special day, like a celebration or feast day or a fast day where anyone in the HH ate special foods or where they ate more or less than usual or did not eat because they were fasting?

**X1\_01.** Was yesterday a special day when special kinds of foods were eaten?  Yes ..... 1  
 No..... 2

If yesterday was **not** a special day, then ask the respondent about the types of foods that they or anyone else in their household ate yesterday during the day and at night, whether at home or outside the home.

If yesterday **was** a special day, then ask the respondent to describe the foods (meals and snacks) consumed the **day before yesterday (or the last normal day)** during the day and night, whether at home or outside the home.

*(Gather information on last 24 hours family food consumption)*

Quantity of family food consumption: Female member in-charge of cooking, supervising and serving to be interviewed.

Recall Date: 

|     |       |      |
|-----|-------|------|
| Day | Month | Year |
|     |       |      |

 Respondent ID:

| Source of Food:                     | Time of day     | Menu         | Menu codes   | Ingredients  | Ingredients  | Total raw weight of ingredients | Cooked weight |
|-------------------------------------|-----------------|--------------|--------------|--------------|--------------|---------------------------------|---------------|
| Left over from previous day..... 1  |                 |              |              |              |              |                                 |               |
| Food cooked in the HH ..... 2       | Morning ..... 1 |              |              |              |              |                                 |               |
| Purchased..... 3                    | Noon ..... 2    |              |              |              |              |                                 |               |
| Food received from others..... 4    | Night..... 3    |              |              |              |              |                                 |               |
| Invitation..... 5                   | Snacks..... 4   |              |              |              |              |                                 |               |
| Food taken at employer's place... 6 |                 |              |              |              |              |                                 |               |
|                                     |                 |              | Code         |              | Code         | (gram)                          | (gram)        |
| <b>X1_02</b>                        | <b>X1_03</b>    | <b>X1_04</b> | <b>X1_05</b> | <b>X1_06</b> | <b>X1_07</b> | <b>X1_08</b>                    | <b>X1_09</b>  |
|                                     |                 |              |              |              |              |                                 |               |
|                                     |                 |              |              |              |              |                                 |               |
|                                     |                 |              |              |              |              |                                 |               |

Household Number:

Module End Time: Hour   Minute

**Module X-2.1: Intra-Household Food Distribution (Female)**

Household Recall (Individual Level):

Module start time: Hour   Minute   Respondent ID:  Consent :  Yes ...1  
No.....2

*(Gather information on last 24 hours family food consumption)*

Quantity of family food consumption: Female member in-charge of cooking, supervising and serving to be interviewed. If anyone has not taken any meal, then put reason code in column X2\_03

Mark tick for appropriate time

|                          |                          |                          |                          |
|--------------------------|--------------------------|--------------------------|--------------------------|
| Morning                  | Noon                     | Night                    | Snacks                   |
| <input type="checkbox"/> | <input type="checkbox"/> | <input type="checkbox"/> | <input type="checkbox"/> |

| Member ID<br>Or Guest/Given food to<br>other/Left over for next day | Name  | If meal not taken, then<br>why not?<br>(If Code is 2 to 9, then<br>move to next MID) | If Guest                            |         |                  | Menu  | Menu<br>codes | Cooked<br>Weight | If curry, then weight of<br>meat/fish in the curry | Where meal<br>was taken | Order of<br>taking meal |
|---------------------------------------------------------------------|-------|--------------------------------------------------------------------------------------|-------------------------------------|---------|------------------|-------|---------------|------------------|----------------------------------------------------|-------------------------|-------------------------|
|                                                                     |       |                                                                                      | Sex<br>Male.....<br>1<br>Female...2 | Age     | Type of<br>Guest |       |               |                  |                                                    |                         |                         |
| Note*                                                               |       | Code 1 ↓                                                                             | Code↑                               | (Years) | Code 2           |       | Code          | (Gram)           | (Gram)                                             | Code 3 ↓                |                         |
| X2_01                                                               | X2_02 | X2_03                                                                                | X2_04                               | X2_05   | X2_06            | X2_07 | X2_08         | X2_09            | X2_10                                              | X2_11                   | X2_12                   |
|                                                                     |       |                                                                                      |                                     |         |                  |       |               |                  |                                                    |                         |                         |
|                                                                     |       |                                                                                      |                                     |         |                  |       |               |                  |                                                    |                         |                         |

|                                                         |                                         |                                        |                                                     |
|---------------------------------------------------------|-----------------------------------------|----------------------------------------|-----------------------------------------------------|
| <b>Note: Write member ID for each household member:</b> | <b>Code 1: Cause of not taking meal</b> | <b>Code 2: Type of guest code</b>      | <b>Code 3: Where meal was taken code</b>            |
| Begin guest code from.....101                           | Yes, meal taken .....1                  | Relatives from outside village ..... 1 | Respondent's home ..... 1                           |
| Food Given to animal code.....201                       | Food was not available .....2           | Relatives from same village .....2     | Employer's house ..... 2                            |
| Food Given to others code.....301                       | Fasting.....3                           | Neighbors.....3                        | Invitation..... 3                                   |
| Food left over code.....401                             | Sickness.....4                          | Friends .....4                         | In market place/hotels ..... 4                      |
|                                                         | Unwilling to take food.....5            | Dignitary .....5                       | Absent ..... 5                                      |
|                                                         | Currently staying away from HH .....6   | Day labor working at house..... 6      | School gate.....6                                   |
|                                                         | Not a valid HH member .....7            | Day labor working at field..... 7      | Local <i>haat/bazar</i> (weekly/daily market).....7 |
|                                                         | Breastfed child .....8                  | Other .....8                           |                                                     |
|                                                         | Others (specify).....9                  |                                        |                                                     |

Module End Time: Hour   Minute



Household Number:

**Module X3: Household Food Habit (Female)**

*Note to Enumerators: Ask these questions to the primary female member or the person who is mainly responsible for preparing food for the household.*

Module start time: Hour   Minu

Respondent ID:  Consent :

Yes...1  
No....2

| Question | Code | Response                                                                                                              | Item | Food Item | Food frequency: <u>READ</u> : Now I would like to ask you about foods that the members of your household consumed at home. Could you please tell me how many days in the past week your household has eaten the following food items, prepared and/or consumed at home and what the source of the food was? |     |     |                             |     |                          |     |     |     |  | How many days consumed in the last 7 days?<br><br>If 0>>skip to next food item<br>CODE 1 | What was the main source of this food in the last 7 days?<br><br>CODE 2 |                                |
|----------|------|-----------------------------------------------------------------------------------------------------------------------|------|-----------|-------------------------------------------------------------------------------------------------------------------------------------------------------------------------------------------------------------------------------------------------------------------------------------------------------------|-----|-----|-----------------------------|-----|--------------------------|-----|-----|-----|--|------------------------------------------------------------------------------------------|-------------------------------------------------------------------------|--------------------------------|
|          |      |                                                                                                                       |      |           | Did you eat this in the last 24 hours<br>Yes...1<br>No....2<br>Not applicable...99                                                                                                                                                                                                                          |     |     |                             |     |                          |     |     |     |  |                                                                                          |                                                                         |                                |
|          |      |                                                                                                                       |      |           | < 2 year old child                                                                                                                                                                                                                                                                                          |     |     | < 2 year old child's mother |     | 14 to 49 year old female |     |     |     |  |                                                                                          |                                                                         | Other members of the household |
|          |      |                                                                                                                       |      |           | X3_09                                                                                                                                                                                                                                                                                                       |     |     | X3_10                       |     | X3_11                    |     |     |     |  |                                                                                          |                                                                         | X3_12                          |
|          |      |                                                                                                                       |      |           | MID                                                                                                                                                                                                                                                                                                         | MID | MID | MID                         | MID | MID                      | MID | MID | MID |  |                                                                                          |                                                                         |                                |
| X3_01    |      | In the past 4 weeks was there ever no food to eat of any kind in your house because of lack of resources to get food? |      | 1         | Cereals (maize, sorghum, millet, barley) and food made from grains, such as bread, rice, noodles, porridge, or [other local grain food]?                                                                                                                                                                    |     |     |                             |     |                          |     |     |     |  |                                                                                          |                                                                         |                                |
| X3_02    |      | How often did this happen in the past 4 weeks?                                                                        |      | 2         | Pumpkin, carrots, squash, or sweet potatoes that are yellow or orange inside or [other local yellow/orange foods]?                                                                                                                                                                                          |     |     |                             |     |                          |     |     |     |  |                                                                                          |                                                                         |                                |
|          |      |                                                                                                                       |      | 3         | White potatoes, white yams, cassava, [other local root crops] or any other foods made from roots?                                                                                                                                                                                                           |     |     |                             |     |                          |     |     |     |  |                                                                                          |                                                                         |                                |



Household Number:

|              |                                                                                                                                                |                                                                                       |  |    |                                                                                                                          |  |  |  |  |  |  |  |  |  |  |  |  |  |  |  |  |
|--------------|------------------------------------------------------------------------------------------------------------------------------------------------|---------------------------------------------------------------------------------------|--|----|--------------------------------------------------------------------------------------------------------------------------|--|--|--|--|--|--|--|--|--|--|--|--|--|--|--|--|
|              |                                                                                                                                                |                                                                                       |  | 4  | Any plantain or green bananas?                                                                                           |  |  |  |  |  |  |  |  |  |  |  |  |  |  |  |  |
| <b>X3_03</b> | In the past 4 weeks did you or any household member go to sleep at night hungry because there was not enough food?                             | Yes... 1<br>No... 1 >><br>X3_05                                                       |  | 5  | Any dark green leafy vegetables such as [local dark green leafy vegetables]?                                             |  |  |  |  |  |  |  |  |  |  |  |  |  |  |  |  |
|              |                                                                                                                                                |                                                                                       |  | 6  | Other Vitamin A rich vegetables                                                                                          |  |  |  |  |  |  |  |  |  |  |  |  |  |  |  |  |
|              |                                                                                                                                                |                                                                                       |  | 7  | Any other vegetables?                                                                                                    |  |  |  |  |  |  |  |  |  |  |  |  |  |  |  |  |
|              |                                                                                                                                                |                                                                                       |  | 8  | Ripe mangoes, ripe papayas or [other local vitamin A-rich fruits]?                                                       |  |  |  |  |  |  |  |  |  |  |  |  |  |  |  |  |
| <b>X3_04</b> | How often did this happen in the past 4 weeks?                                                                                                 | Rarely (1-2 times) ... 1<br>Sometimes (3-10 times) ... 2<br>Often (> 10 times) .... 3 |  | 9  | Any other fruits?                                                                                                        |  |  |  |  |  |  |  |  |  |  |  |  |  |  |  |  |
|              |                                                                                                                                                |                                                                                       |  | 10 | Any liver, kidney, heart, or other organ meats from domesticated animals such as cow, pig, lamb, goat, chicken, or duck? |  |  |  |  |  |  |  |  |  |  |  |  |  |  |  |  |
|              |                                                                                                                                                |                                                                                       |  | 11 | Any meat from domesticated animals, such as cow, pig, lamb, goat, chicken, or duck?                                      |  |  |  |  |  |  |  |  |  |  |  |  |  |  |  |  |
| <b>X3_05</b> | In the past 4 weeks did you or any household member go a whole day and night without eating anything at all because there was not enough food? | Yes... 1<br>No... 2 >><br>X3_07                                                       |  | 12 | Any liver, kidney, heart, or other organ meats from wild animals such as [turtle, snake, wild pig, wild chicken etc.]?   |  |  |  |  |  |  |  |  |  |  |  |  |  |  |  |  |
|              |                                                                                                                                                |                                                                                       |  | 13 | Any flesh from wild animals, such as [turtle, snake, wild pig, wild chicken etc.]?                                       |  |  |  |  |  |  |  |  |  |  |  |  |  |  |  |  |
|              |                                                                                                                                                |                                                                                       |  | 14 | Eggs?                                                                                                                    |  |  |  |  |  |  |  |  |  |  |  |  |  |  |  |  |
|              |                                                                                                                                                |                                                                                       |  | 15 | Fresh or dried fish, shellfish, or seafood?                                                                              |  |  |  |  |  |  |  |  |  |  |  |  |  |  |  |  |

Household Number:

|              |                                                |                                                                                   |    |                                                                                                                                               |  |  |  |  |  |  |  |  |  |  |  |  |  |  |  |  |  |
|--------------|------------------------------------------------|-----------------------------------------------------------------------------------|----|-----------------------------------------------------------------------------------------------------------------------------------------------|--|--|--|--|--|--|--|--|--|--|--|--|--|--|--|--|--|
|              |                                                |                                                                                   | 16 | Any foods made from beans, peas, or lentils, such as [ <i>anchor dal, shimer bichi, mosur dal</i> etc.]?                                      |  |  |  |  |  |  |  |  |  |  |  |  |  |  |  |  |  |
|              |                                                |                                                                                   | 17 | Any foods made from nuts or seeds such as [ <i>chinabadam, til, tishi</i> etc.]?                                                              |  |  |  |  |  |  |  |  |  |  |  |  |  |  |  |  |  |
|              |                                                |                                                                                   | 18 | Milk, cheese, yogurt, or other milk products?                                                                                                 |  |  |  |  |  |  |  |  |  |  |  |  |  |  |  |  |  |
|              |                                                |                                                                                   | 19 | Any oil, fats, or butter, or foods made with any of these?                                                                                    |  |  |  |  |  |  |  |  |  |  |  |  |  |  |  |  |  |
|              |                                                |                                                                                   | 20 | Any sweet or sugary foods such as honey, chocolates, sweets, candies, pastries, cakes, or biscuits?                                           |  |  |  |  |  |  |  |  |  |  |  |  |  |  |  |  |  |
|              |                                                |                                                                                   | 21 | Condiments for flavor, such as <i>aachars</i> , chilies, spices, herbs, fish powder or [ <i>chuijhal, darchini, chukaru, mouriseed</i> etc.]? |  |  |  |  |  |  |  |  |  |  |  |  |  |  |  |  |  |
| <b>X3_06</b> | How often did this happen in the past 4 weeks? | Rarely (1-2 times)... 1<br>Sometimes (3-10 times)... 2<br>Often (> 10 times)... 3 | 22 | Grubs, snails or insects such as [ <i>shamuk, jhinuk</i> etc.]?                                                                               |  |  |  |  |  |  |  |  |  |  |  |  |  |  |  |  |  |
|              |                                                |                                                                                   | 23 | Tobacco (and other addictive substances)                                                                                                      |  |  |  |  |  |  |  |  |  |  |  |  |  |  |  |  |  |
|              |                                                |                                                                                   | 24 | Foods made with red palm oil, red palm nut, or red palm nut pulp sauce?                                                                       |  |  |  |  |  |  |  |  |  |  |  |  |  |  |  |  |  |
|              |                                                |                                                                                   | 25 | Any other foods (not mentioned in the list above)                                                                                             |  |  |  |  |  |  |  |  |  |  |  |  |  |  |  |  |  |

Household Number:

|                                                                                                                                                                                 |                                                                                                                                                                                                                                                                                                                                       |
|---------------------------------------------------------------------------------------------------------------------------------------------------------------------------------|---------------------------------------------------------------------------------------------------------------------------------------------------------------------------------------------------------------------------------------------------------------------------------------------------------------------------------------|
| <b>Code 1: Food Frequency</b><br>Not eaten ..... 0<br>1 day ..... 1<br>2 days ..... 2<br>3 days ..... 3<br>4 days ..... 4<br>5 days ..... 5<br>6 days ..... 6<br>7 days ..... 7 | <b>Code 2: Source of Food</b><br>Own production ..... 1<br>Hunting/gathering/fishing ..... 2<br>Bought using cash ..... 3<br>Bought on credit ..... 4<br>Borrowed (friends/relatives) ..... 5<br>Gifts (friends/relatives) ..... 6<br>Begging ..... 7<br>Received as payment ..... 8<br>Food assistance ..... 9<br>Collected ..... 10 |
|---------------------------------------------------------------------------------------------------------------------------------------------------------------------------------|---------------------------------------------------------------------------------------------------------------------------------------------------------------------------------------------------------------------------------------------------------------------------------------------------------------------------------------|

**Module X4: Bad time (keeping income in mind). Recall period: last 12 months (2017): (Male and Female)**

|      |                                                                            | Month 1 (A) | Month 2(B) | Code                                                                                                                 |                                                                                                                                                       |
|------|----------------------------------------------------------------------------|-------------|------------|----------------------------------------------------------------------------------------------------------------------|-------------------------------------------------------------------------------------------------------------------------------------------------------|
| X4_1 | Based on your income which months are usually the worst for your household |             |            | January ..... 1<br>February ..... 2<br>March ..... 3<br>April ..... 4<br>May ..... 5<br>June ..... 6<br>July ..... 7 | August ..... 8<br>September ..... 9<br>October ..... 10<br>November ..... 11<br>December ..... 12<br>No income shortage in any of the months ..... 13 |

**ENSURE COMPLETE PRIVACY BEFORE CONTINUING WITH THIS MODULE.**

Module End Time: 

|      |                      |                      |        |                      |                      |
|------|----------------------|----------------------|--------|----------------------|----------------------|
| Hour | <input type="text"/> | <input type="text"/> | Minute | <input type="text"/> | <input type="text"/> |
|------|----------------------|----------------------|--------|----------------------|----------------------|

Household Number:

**Module X5: Food Security and Resilience (Female)**

Recall period: Past 12 months

Module start time: Hour   Minu

Respondent ID:  Consent :  Yes ...1  
No.....2

*Note to Enumerators: Respondent should be the individual is responsible for preparing food for the household*

Now I would like to ask you some questions about your food consumption in the past 12 months.

| Serial no. | Question                                                                                                                                                                           | Response             | Response Code                          |
|------------|------------------------------------------------------------------------------------------------------------------------------------------------------------------------------------|----------------------|----------------------------------------|
| X5_01      | During the past 12 months, was there a time when you or others in your household were worried you would not have enough food to eat because of a lack of money or other resources? | <input type="text"/> | Yes.....1<br>No.....2<br>Refused.....3 |
| X5_02      | During the past 12 months, was there a time when you or others in your household were unable to eat healthy and nutritious food because of a lack of money or other resources?     | <input type="text"/> | Yes.....1<br>No.....2<br>Refused.....3 |
| X5_03      | During the past 12 months, was there a time when you or others in your household ate only a few kinds of foods because of a lack of money or other resources?                      | <input type="text"/> | Yes.....1<br>No.....2<br>Refused.....3 |
| X5_04      | During the past 12 months, was there a time when your household did not have food because of a lack of money or other resources?                                                   | <input type="text"/> | Yes.....1<br>No.....2<br>Refused.....3 |
| X5_05      | During the past 12 months, was there a time when you or others in your household ate less than you thought you should because of a lack of money or other resources?               | <input type="text"/> | Yes.....1<br>No.....2<br>Refused.....3 |
| X5_06      | During the past 12 months, was there a time when you or others in your household had to skip a meal because there was not enough money or other resources to get food?             | <input type="text"/> | Yes.....1<br>No.....2<br>Refused.....3 |
| X5_07      | During the past 12 months, was there a time when you or others in your household were hungry but did not eat because there was not enough money or other resources for food?       | <input type="text"/> | Yes.....1<br>No.....2<br>Refused.....3 |
| X5_08      | During the past 12 months, was there a time when you or others in your household went without eating for a whole day because of a lack of money or other resources?                | <input type="text"/> | Yes.....1<br>No.....2<br>Refused.....3 |

Household Number:

Next I will ask you some questions about other kinds of difficult times that people face in the past 12 months

| Shocks (unexpected events)                                                                                                                                                             | Shock Code  | Has this shock occurred in the past 12 months?<br>Yes ..... 1<br>No..... 2 >><br>NEXT Row | How severely did this event affect your hh's economic condition?<br><br>Not Severe... 1<br>Somewhat severe...2<br>Severe...3<br>Extremely severe...4<br>Refused to answer...5 | How severely did this event affect your hh's food condition?<br><br>Not Severe... 1<br>Somewhat severe...2<br>Severe...3<br>Extremely severe...4<br>Refused to answer...5 | If T1_02 is "yes" how have you or your hh coped with this situation? |                |                |
|----------------------------------------------------------------------------------------------------------------------------------------------------------------------------------------|-------------|-------------------------------------------------------------------------------------------|-------------------------------------------------------------------------------------------------------------------------------------------------------------------------------|---------------------------------------------------------------------------------------------------------------------------------------------------------------------------|----------------------------------------------------------------------|----------------|----------------|
|                                                                                                                                                                                        |             |                                                                                           |                                                                                                                                                                               |                                                                                                                                                                           | Code 1                                                               |                |                |
| <b>X5_09a</b>                                                                                                                                                                          | <b>code</b> | <b>X5_09b</b>                                                                             | <b>X5_09c</b>                                                                                                                                                                 | <b>X5_09d</b>                                                                                                                                                             | <b>X5_09e1</b>                                                       | <b>X5_09e2</b> | <b>X5_09e3</b> |
| In the past 12 months, did your household face difficult times as a result of having too much rain?                                                                                    | 41          |                                                                                           |                                                                                                                                                                               |                                                                                                                                                                           |                                                                      |                |                |
| In the past 12 months, did your household face difficult times as a result of having too little rain?                                                                                  | 42          |                                                                                           |                                                                                                                                                                               |                                                                                                                                                                           |                                                                      |                |                |
| In the past 12 months, did your household face difficult times as a result of erosion of your land?                                                                                    | 43          |                                                                                           |                                                                                                                                                                               |                                                                                                                                                                           |                                                                      |                |                |
| In the past 12 months, did your household face difficult times as a result of losing your household's land?                                                                            | 44          |                                                                                           |                                                                                                                                                                               |                                                                                                                                                                           |                                                                      |                |                |
| In the past 12 months, did your household face difficult times as a result of sharp increases in the price of food?                                                                    | 45          |                                                                                           |                                                                                                                                                                               |                                                                                                                                                                           |                                                                      |                |                |
| In the past 12 months, did your household face difficult times as a result of someone stealing or destroying household members' belongings?                                            | 46          |                                                                                           |                                                                                                                                                                               |                                                                                                                                                                           |                                                                      |                |                |
| In the past 12 months, did your household face difficult times as a result of not being able to access inputs for your crops?                                                          | 47          |                                                                                           |                                                                                                                                                                               |                                                                                                                                                                           |                                                                      |                |                |
| In the past 12 months, did your household face difficult times as a result of disease affecting your crops?                                                                            | 102         |                                                                                           |                                                                                                                                                                               |                                                                                                                                                                           |                                                                      |                |                |
| In the past 12 months, did your household face difficult times as a result of pests affecting your crops?                                                                              | 103         |                                                                                           |                                                                                                                                                                               |                                                                                                                                                                           |                                                                      |                |                |
| In the past 12 months, did your household face difficult times as a result of someone stealing crops from your household?                                                              | 48          |                                                                                           |                                                                                                                                                                               |                                                                                                                                                                           |                                                                      |                |                |
| In the past 12 months, did your household face difficult times as a result of not being able to access inputs for your livestock?                                                      | 49          |                                                                                           |                                                                                                                                                                               |                                                                                                                                                                           |                                                                      |                |                |
| In the past 12 months, did your household face difficult times as a result of disease affecting your livestock?                                                                        | 50          |                                                                                           |                                                                                                                                                                               |                                                                                                                                                                           |                                                                      |                |                |
| In the past 12 months, did your household face difficult times as a result of someone stealing animals from your household?                                                            | 13          |                                                                                           |                                                                                                                                                                               |                                                                                                                                                                           |                                                                      |                |                |
| In the past 12 months, did your household face difficult times as a result of not being able to sell the crops, livestock, or other products your household produces for a fair price? | 51          |                                                                                           |                                                                                                                                                                               |                                                                                                                                                                           |                                                                      |                |                |
| Has anyone in your household experienced a severe illness in the past 12 months?                                                                                                       | 52          |                                                                                           |                                                                                                                                                                               |                                                                                                                                                                           |                                                                      |                |                |
| Has your household experienced the death of a family member in the past 12 months?                                                                                                     | 2           |                                                                                           |                                                                                                                                                                               |                                                                                                                                                                           |                                                                      |                |                |

Household Number:

| Code 1: Coping strategies                                       |   |                                                               |    |                                                             |    |
|-----------------------------------------------------------------|---|---------------------------------------------------------------|----|-------------------------------------------------------------|----|
| None.....                                                       | 1 | Ate less food to reduce expenses.....                         | 10 | Emergency receipt of remittance from migrant family member. | 20 |
| Sold land (specify homestead or agricultural) .....             | 2 | Ate lower quality food to reduce expenses.....                | 11 | Forced to change occupation .....                           | 21 |
| Mortgaged/leased land (specify homestead or agricultural) ..... | 3 | Took children out of school .....                             | 12 | Moved to less expensive housing.....                        | 22 |
| Sold productive asset (specify).....                            | 4 | Transferred children to less expensive school .....           | 13 | Sent non-working household member to work .....             | 23 |
| Mortgaged productive asset (specify).....                       | 5 | Adult household member took job elsewhere temporarily .....   | 14 | Took help from others .....                                 | 24 |
| Sold consumption asset (specify) .....                          | 6 | Sent household member away permanently .....                  | 15 | Other (specify).....                                        | 25 |
| Mortgaged consumption asset (specify) .....                     | 7 | Sent children to be fostered by relatives.....                | 16 |                                                             |    |
| Took loan from NGO/institution .....                            | 8 | Sent children into domestic service.....                      | 17 |                                                             |    |
| Took loan from mahajan/non-institutional source .....           | 9 | Sent children to work somewhere other than domestic service . | 18 |                                                             |    |
|                                                                 |   | Sent children to his parental home .....                      | 19 |                                                             |    |

Now I would like to ask you a few more questions concerning these difficult times

| Serial no. | Question                                                                                                                                                                                                                                                                                                                                                                                                                                                                                                                                                                                      | Response             |                                             |                      | Response Code                                                                                                                                                                                    |
|------------|-----------------------------------------------------------------------------------------------------------------------------------------------------------------------------------------------------------------------------------------------------------------------------------------------------------------------------------------------------------------------------------------------------------------------------------------------------------------------------------------------------------------------------------------------------------------------------------------------|----------------------|---------------------------------------------|----------------------|--------------------------------------------------------------------------------------------------------------------------------------------------------------------------------------------------|
| X5_10      | Would you say that right now, your household's ability to meet your food needs is:<br><br>Better than before these difficult times?<br>The same as before these difficult times?<br>Or worse than before these difficult times?                                                                                                                                                                                                                                                                                                                                                               | <input type="text"/> |                                             |                      | BETTER THAN BEFORE DIFFICULT TIMES.....1<br>SAME AS BEFORE DIFFICULT TIMES.....2<br>WORSE THAN BEFORE DIFFICULT TIMES.....3<br>HOUSEHOLD DID NOT FACE ANY NEGATIVE SHOCKS.....4<br>REFUSED.....7 |
| X5_11      | Looking ahead over the next year, do you believe your household's ability to meet your food needs will be:<br><br>Better than before these difficult times?<br>The same as before these difficult times?<br>Or worse than before these difficult times?                                                                                                                                                                                                                                                                                                                                       | <input type="text"/> |                                             |                      | BETTER THAN BEFORE DIFFICULT TIMES.....1<br>SAME AS BEFORE DIFFICULT TIMES.....2<br>WORSE THAN BEFORE DIFFICULT TIMES.....3<br>HOUSEHOLD DID NOT FACE ANY NEGATIVE SHOCKS.....4<br>REFUSED.....7 |
| X5_12      | Thank you for sharing your experiences.<br><br>Now I will ask you some questions about whether your household will be able to lean on others for financial or food support during difficult times.<br><br>By difficult times I mean times when there is loss of a family member, loss of income, hunger, drought, flood, conflict or similar events.<br><br>Will your household be able to lean on:<br>a) Relatives living in your community?<br>b) Relatives living outside your community?<br>c) Non-relatives living in your community?<br>d) Non-relatives living outside your community? | no.                  | Item                                        | Answer               |                                                                                                                                                                                                  |
|            |                                                                                                                                                                                                                                                                                                                                                                                                                                                                                                                                                                                               | a                    | Relatives living in your community          | <input type="text"/> |                                                                                                                                                                                                  |
|            |                                                                                                                                                                                                                                                                                                                                                                                                                                                                                                                                                                                               | b                    | Relatives living outside your community     | <input type="text"/> |                                                                                                                                                                                                  |
|            |                                                                                                                                                                                                                                                                                                                                                                                                                                                                                                                                                                                               | c                    | Non-relatives living in your community      | <input type="text"/> |                                                                                                                                                                                                  |
|            |                                                                                                                                                                                                                                                                                                                                                                                                                                                                                                                                                                                               | d                    | Non-relatives living outside your community | <input type="text"/> |                                                                                                                                                                                                  |
| X5_13      | Will the same people that you will be able to lean on during your difficult times also be able to lean on you for financial or food support during their difficult times?                                                                                                                                                                                                                                                                                                                                                                                                                     | <input type="text"/> |                                             |                      |                                                                                                                                                                                                  |
| X5_14      | Do you believe your local government will help the community cope with difficult times in the future, for example during [flood, drought, tornado, cyclone, etc. (any event will have a negative impact on all members of the community)]?                                                                                                                                                                                                                                                                                                                                                    | <input type="text"/> |                                             |                      | YES.....1<br>No, Will not be able to.....2<br>No, support not needed.....3                                                                                                                       |

Module End Time:  Hour   Minute

Household Number:

**Module Y: Nutrition Practices and Services (Female)**  
**Module Y1: Infant and Young Child Feeding (IYCF) Practices and Use of Micronutrients (Female)**

Module start time: Hour     Minu    Respondent ID:  Consent :  Yes ...1 No....2

| Question Number | Questions                                               | Response             | Code                                     |
|-----------------|---------------------------------------------------------|----------------------|------------------------------------------|
| Y1_00           | Is there any child less than 2 years in this household? | <input type="text"/> | Yes.....1<br>No.....2>> <b>Module Y8</b> |

Note to Enumerators: The questions below are concerning children of less than 2 years old.

| Question Number    | Questions                                                                          | Youngest child <24 months                                                              |                                                                                        | Code                                                                                                                                                                                                                                                                                                                                                                                                                                                                                                                                                                                                                                                                                                                                                                                                                                                   |
|--------------------|------------------------------------------------------------------------------------|----------------------------------------------------------------------------------------|----------------------------------------------------------------------------------------|--------------------------------------------------------------------------------------------------------------------------------------------------------------------------------------------------------------------------------------------------------------------------------------------------------------------------------------------------------------------------------------------------------------------------------------------------------------------------------------------------------------------------------------------------------------------------------------------------------------------------------------------------------------------------------------------------------------------------------------------------------------------------------------------------------------------------------------------------------|
|                    |                                                                                    | Child 1                                                                                | Child 2                                                                                |                                                                                                                                                                                                                                                                                                                                                                                                                                                                                                                                                                                                                                                                                                                                                                                                                                                        |
| Child's Member ID  | Child's name and ID (from Module B)                                                | Child's Name: _____<br>Mem. ID <input type="text"/>                                    | Child's Name: _____<br>Mem ID <input type="text"/>                                     | Name and Member ID                                                                                                                                                                                                                                                                                                                                                                                                                                                                                                                                                                                                                                                                                                                                                                                                                                     |
| Mother's Member ID | Child's mother's name and ID (from Module B)                                       | Mother's Name: _____<br>Mem. ID <input type="text"/>                                   |                                                                                        | Name and Member ID<br>If individual is not a member of the household, write 55.                                                                                                                                                                                                                                                                                                                                                                                                                                                                                                                                                                                                                                                                                                                                                                        |
| Father's Member ID | Child's father's name and ID (from Module B)                                       | Father's Name: _____<br>Mem. ID <input type="text"/>                                   |                                                                                        | Name and Member ID<br>If individual is not a member of the household, write 55.                                                                                                                                                                                                                                                                                                                                                                                                                                                                                                                                                                                                                                                                                                                                                                        |
| Y1_01              | Where was this child of yours <NAME> delivered?                                    | <input type="text"/>                                                                   | <input type="text"/>                                                                   | Your home ..... 1<br>Natal house..... 2<br>Other house ..... 3<br>Government/private hospital, clinic, UHC ..... 4<br>Other (specify) ..... 5                                                                                                                                                                                                                                                                                                                                                                                                                                                                                                                                                                                                                                                                                                          |
| Y1_02              | Who was present to help you during <NAME's> delivery? (Multiple response possible) | <input type="text"/> <input type="text"/><br><input type="text"/> <input type="text"/> | <input type="text"/> <input type="text"/><br><input type="text"/> <input type="text"/> | Govt. Hospital/Upazila Health Comple ..... 1<br>Doctor ..... 2<br>Midwife/nurse..... 3<br>Govt. Heath Worker (FWA/HA) ..... 4<br>MA/SACMO..... 5<br>BRAC SS ..... 6<br>BRAC SK..... 7<br>BRAC Pushti Kormi (PK)/IYCF Promoter ..... 8<br>Others NGO Worker ..... 9<br>TTBA ..... 10<br>TBA ..... 11<br>Village Doctor..... 12<br>Homeopath Doctor ..... 13<br>Kabiraj/Herbal healer ..... 14<br>Spiritual Healer.....15<br>Pharmacy .....16<br>Husband .....17<br>Mother/Mother in law .....18<br>Other Family members.....19<br>Neighbors/ Friends.....20<br>Private Hospital/ Clinic.....21<br>Mother and Children Welfare Centre (MCWC) .....22<br>Community Clinic.....23<br>Satellinte Clinic/ EPI Center .....24<br>Smiling Sun Clinic.....25<br>Self.....26<br>Nobody .....27<br>Other (specify) .....77<br>Do not know/ do not remember.... 88 |

Household Number:

| Question Number | Questions                                                                                                                                                                                                                                                                                                                                              | Youngest child <24 months                                            |                                                                      | Code                                                                                                                                                                                                                                                                                                                                                                                             |                                                                                                                                                                                                                                                                                                                                                                                                                                                                           |
|-----------------|--------------------------------------------------------------------------------------------------------------------------------------------------------------------------------------------------------------------------------------------------------------------------------------------------------------------------------------------------------|----------------------------------------------------------------------|----------------------------------------------------------------------|--------------------------------------------------------------------------------------------------------------------------------------------------------------------------------------------------------------------------------------------------------------------------------------------------------------------------------------------------------------------------------------------------|---------------------------------------------------------------------------------------------------------------------------------------------------------------------------------------------------------------------------------------------------------------------------------------------------------------------------------------------------------------------------------------------------------------------------------------------------------------------------|
|                 |                                                                                                                                                                                                                                                                                                                                                        | Child 1                                                              | Child 2                                                              |                                                                                                                                                                                                                                                                                                                                                                                                  |                                                                                                                                                                                                                                                                                                                                                                                                                                                                           |
| Y1_03           | Did anyone help you put the baby to the breast after birth?                                                                                                                                                                                                                                                                                            | <input type="text"/>                                                 | <input type="text"/>                                                 | Yes ..... 1<br>No ..... 2 >> Y1_03b                                                                                                                                                                                                                                                                                                                                                              |                                                                                                                                                                                                                                                                                                                                                                                                                                                                           |
| Y1_03a          | Who helped you put the baby to the breast after birth?                                                                                                                                                                                                                                                                                                 | <input type="text"/>                                                 | <input type="text"/>                                                 | Govt. Hospital/Upazila Health Comple ..... 1<br>Doctor ..... 2<br>Midwife/nurse ..... 3<br>Govt. Heath Worker (FWA/HA) ..... 4<br>MA/SACMO ..... 5<br>BRAC SS ..... 6<br>BRAC SK ..... 7<br>BRAC Pushti Kormi (PK)/YICF Promoter ..... 8<br>Others NGO Worker ..... 9<br>TTBA ..... 10<br>TBA ..... 11<br>Village Doctor ..... 12<br>Homeopath Doctor ..... 13<br>Kabiraj/Herbal healer ..... 14 | Spiritual Healer ..... 15<br>Pharmacy ..... 16<br>Husband ..... 17<br>Mother/Mother in law ..... 18<br>Other Family members ..... 19<br>Neighbors/ Friends ..... 20<br>Private Hospital/ Clinic ..... 21<br>Mother and Children Welfare Centre (MCWC) ..... 22<br>Community Clinic ..... 23<br>Satellite Clinic/ EPI Center ..... 24<br>Smiling Sun Clinic ..... 25<br>Self ..... 26<br>Nobody ..... 27<br>Other (specify) ..... 77<br>Do not know/ do not remember... 88 |
| Y1_03b          | How soon did you put the child to the breast after birth?<br>(Note: If respondent says that the baby was put to breast right after birth or within 1 hour of birth then write 0 hours. If the respondent mentions within 1 to 23 hours of birth then write the number of hours. If the time was 24 hours more than 24 hours then write number of days) | Hours <input type="text"/><br><br>Days <input type="text"/>          | Hours <input type="text"/><br><br>Days <input type="text"/>          | Right after birth or within less than 1 hour, write "0"<br>If less than 24 hours, write hours<br>If 24 hours or more than 24 hours, write number of days                                                                                                                                                                                                                                         |                                                                                                                                                                                                                                                                                                                                                                                                                                                                           |
| Y1_03c          | Was there anything put to the child's mouth immediately after birth?                                                                                                                                                                                                                                                                                   | <input type="text"/>                                                 | <input type="text"/>                                                 | Yes ..... 1<br>No ..... 2 >> Y1_04<br>Don't know ..... 88 >> Y1_04                                                                                                                                                                                                                                                                                                                               |                                                                                                                                                                                                                                                                                                                                                                                                                                                                           |
| Y1_03d          | What was put to the child's mouth immediately after birth by you or anyone else?<br><i>Interviewer:</i> Please verify what food was given to the child by mother and also by anyone else                                                                                                                                                               | <input type="text"/><br><input type="text"/><br><input type="text"/> | <input type="text"/><br><input type="text"/><br><input type="text"/> | Honey ..... 1<br>Mustard oil ..... 2<br>Plain water ..... 3<br>Sugar/glucose water ..... 4<br>Tea/Coffee ..... 5                                                                                                                                                                                                                                                                                 | Cow/Goat milk ..... 6<br>Breast milk ..... 7<br>Other (specify) ..... 77<br>Do not remember ..... 88                                                                                                                                                                                                                                                                                                                                                                      |



Household Number:

| Question Number                                                                    | Questions                                                                                                                                                                                                             | Youngest child <24 months                                            |                                                                      | Code                                                                                                                                                                                                                                                                                                                                                                                       |                                                                                                                                                                                                                                                                                                                                                                                                                                                       |                                                                                   |  |  |
|------------------------------------------------------------------------------------|-----------------------------------------------------------------------------------------------------------------------------------------------------------------------------------------------------------------------|----------------------------------------------------------------------|----------------------------------------------------------------------|--------------------------------------------------------------------------------------------------------------------------------------------------------------------------------------------------------------------------------------------------------------------------------------------------------------------------------------------------------------------------------------------|-------------------------------------------------------------------------------------------------------------------------------------------------------------------------------------------------------------------------------------------------------------------------------------------------------------------------------------------------------------------------------------------------------------------------------------------------------|-----------------------------------------------------------------------------------|--|--|
|                                                                                    |                                                                                                                                                                                                                       | Child 1                                                              | Child 2                                                              |                                                                                                                                                                                                                                                                                                                                                                                            |                                                                                                                                                                                                                                                                                                                                                                                                                                                       |                                                                                   |  |  |
| Y1_03e                                                                             | Who put food to the child's mouth immediately after birth? (Multiple response possible)                                                                                                                               | <input type="text"/><br><input type="text"/><br><input type="text"/> | <input type="text"/><br><input type="text"/><br><input type="text"/> | Govt. Hospital/Upazila Health Comple..... 1<br>Doctor ..... 2<br>Midwife/nurse..... 3<br>Govt. Heath Worker (FWA/HA)..... 4<br>MA/SACMO..... 5<br>BRAC SS ..... 6<br>BRAC SK..... 7<br>BRAC Pushti Kormi (PK)/YICF Promoter ..... 8<br>Others NGO Worker ..... 9<br>TTBA ..... 10<br>TBA ..... 11<br>Village Doctor..... 12<br>Homeopath Doctor ..... 13<br>Kabiraj/Herbal healer ..... 14 | Spiritual Healer .....15<br>Pharmacy .....16<br>Husband.....17<br>Mother/Mother in law .....18<br>Other Family members.....19<br>Neighbors/ Friends.....20<br>Private Hospital/ Clinic.....21<br>Mother and Children Welfare Centre (MCWC) .....22<br>Community Clinic.....23<br>Satellite Clinic/ EPI Center .....24<br>Smiling Sun Clinic.....25<br>Self.....26<br>Nobody .....27<br>Other (specify) .....77<br>Do not know/ do not remember.... 88 |                                                                                   |  |  |
| Y1_04                                                                              | During the first 3 days after the baby was born, what was given to the child by you or anyone else? (Multiple response possible)                                                                                      | <input type="text"/> <input type="text"/> <input type="text"/>       | <input type="text"/> <input type="text"/> <input type="text"/>       | Honey.....1<br>Mustard oil.....2<br>Plain water.....3                                                                                                                                                                                                                                                                                                                                      | Sugar/glucose water.....4<br>Tea/Coffee.....5<br>Cow/Goat milk.....6                                                                                                                                                                                                                                                                                                                                                                                  | Breast milk.....7<br>Other (specify).....77<br>Do not remember.....88             |  |  |
| Y1_05                                                                              | Did you give the child colostrum?                                                                                                                                                                                     | <input type="text"/>                                                 | <input type="text"/>                                                 | Yes (gave to child) ..... 1<br>No (did not give to child) ..... 2                                                                                                                                                                                                                                                                                                                          |                                                                                                                                                                                                                                                                                                                                                                                                                                                       |                                                                                   |  |  |
| Y1_05a                                                                             | From birth until now, has this child ever been given expressed breast milk (in a cup or bowl)?                                                                                                                        | <input type="text"/>                                                 | <input type="text"/>                                                 | Yes ..... 1<br>No ..... 2                                                                                                                                                                                                                                                                                                                                                                  |                                                                                                                                                                                                                                                                                                                                                                                                                                                       |                                                                                   |  |  |
| <i>Now we would like to ask you about what the child's current eating pattern:</i> |                                                                                                                                                                                                                       |                                                                      |                                                                      |                                                                                                                                                                                                                                                                                                                                                                                            |                                                                                                                                                                                                                                                                                                                                                                                                                                                       |                                                                                   |  |  |
| Y1_06                                                                              | Is the child still breastfeeding?                                                                                                                                                                                     | <input type="text"/>                                                 | <input type="text"/>                                                 | Yes ..... 1>>Y1_09<br>No ..... 2<br>Never..... 3>> Y1_09                                                                                                                                                                                                                                                                                                                                   |                                                                                                                                                                                                                                                                                                                                                                                                                                                       |                                                                                   |  |  |
| Y1_07                                                                              | If no, at what age did you stop breastfeeding the child?                                                                                                                                                              | <input type="text"/>                                                 | <input type="text"/>                                                 | Month<br>Don't Know/cannot remember .... 88                                                                                                                                                                                                                                                                                                                                                |                                                                                                                                                                                                                                                                                                                                                                                                                                                       |                                                                                   |  |  |
| Y1_08                                                                              | Why did you stop breastfeeding?                                                                                                                                                                                       | <input type="text"/>                                                 | <input type="text"/>                                                 | Problems with breast (pain).....1<br>Child does not suck well.....2<br>Not enough time to feed child.....3                                                                                                                                                                                                                                                                                 | Child already grown up/ No need for breast feeding.....4<br>Mother got pregnant.....5<br>New baby born.....6                                                                                                                                                                                                                                                                                                                                          | Cracked nipples...7<br>Felt not enough breast milk..... 8<br>Other (specify)....9 |  |  |
| Y1_09                                                                              | At what age did you start giving the following liquids/foods to the child?<br>If mother fed her child any of the following food within the first 29 days (less than 1 months of age), this can be noted as "0" month. |                                                                      |                                                                      |                                                                                                                                                                                                                                                                                                                                                                                            |                                                                                                                                                                                                                                                                                                                                                                                                                                                       |                                                                                   |  |  |
|                                                                                    | 1. Water                                                                                                                                                                                                              | <input type="text"/>                                                 | <input type="text"/>                                                 | At "0" month of age ..... 0                                                                                                                                                                                                                                                                                                                                                                |                                                                                                                                                                                                                                                                                                                                                                                                                                                       |                                                                                   |  |  |

Household Number:

| Question Number                                                                                                                | Questions                                                                                             | Youngest child <24 months |                          | Code                                                                                                                       |
|--------------------------------------------------------------------------------------------------------------------------------|-------------------------------------------------------------------------------------------------------|---------------------------|--------------------------|----------------------------------------------------------------------------------------------------------------------------|
|                                                                                                                                |                                                                                                       | Child 1                   | Child 2                  |                                                                                                                            |
|                                                                                                                                | 2. Other non breast milk liquids (sugar/glucose water, tea, fruit juice etc.)                         | <input type="checkbox"/>  | <input type="checkbox"/> | At "1" month of age ..... 1<br>At "2" months of age..... 2<br>At "3" months of age..... 3<br>At "12" months of age..... 12 |
|                                                                                                                                | 3. Cow/Goat milk                                                                                      | <input type="checkbox"/>  | <input type="checkbox"/> | So on<br>Don't Know ..... 88                                                                                               |
|                                                                                                                                | 4. Sooji, rice gruel, etc.                                                                            | <input type="checkbox"/>  | <input type="checkbox"/> | Not given yet.....99                                                                                                       |
|                                                                                                                                | 5. Semi-solid foods (soft rice, khichuri, mashed potato, ripe banana, other mashed family foods etc.) | <input type="checkbox"/>  | <input type="checkbox"/> |                                                                                                                            |
|                                                                                                                                | 6. Solid foods (such as rice, wheat, puffed/ pressed rice etc.)                                       | <input type="checkbox"/>  | <input type="checkbox"/> |                                                                                                                            |
|                                                                                                                                | 7. Fish                                                                                               | <input type="checkbox"/>  | <input type="checkbox"/> |                                                                                                                            |
|                                                                                                                                | 8. Meat (chicken, mutton, beef, etc., khichuri with meat)                                             | <input type="checkbox"/>  | <input type="checkbox"/> |                                                                                                                            |
|                                                                                                                                | 9. Eggs                                                                                               | <input type="checkbox"/>  | <input type="checkbox"/> |                                                                                                                            |
|                                                                                                                                | 10. Legumes (pulse, peas, etc.)                                                                       | <input type="checkbox"/>  | <input type="checkbox"/> |                                                                                                                            |
|                                                                                                                                | 11. Green vegetables                                                                                  | <input type="checkbox"/>  | <input type="checkbox"/> |                                                                                                                            |
|                                                                                                                                | 12. Snack foods (chanachur, chips)                                                                    | <input type="checkbox"/>  | <input type="checkbox"/> |                                                                                                                            |
|                                                                                                                                | 13. Biscuit                                                                                           | <input type="checkbox"/>  | <input type="checkbox"/> |                                                                                                                            |
|                                                                                                                                | 14. Pustikona/Monimix/Mymix                                                                           | <input type="checkbox"/>  | <input type="checkbox"/> |                                                                                                                            |
| <i>The following questions are based on previous day (last 24 hours) recall, i.e., yesterday during the day and the night.</i> |                                                                                                       |                           |                          |                                                                                                                            |
| Y1_10                                                                                                                          | How many times did you breastfeed [NAME] yesterday, during the day or night?                          | <input type="checkbox"/>  | <input type="checkbox"/> | Number of times<br>Stopped breast feeding/Never breast fed .....99                                                         |

Household Number:

| Question Number | Questions                                                                                                                                                                                                                                                                                                                                                                      | Youngest child <24 months |                      | Code                                             |
|-----------------|--------------------------------------------------------------------------------------------------------------------------------------------------------------------------------------------------------------------------------------------------------------------------------------------------------------------------------------------------------------------------------|---------------------------|----------------------|--------------------------------------------------|
|                 |                                                                                                                                                                                                                                                                                                                                                                                | Child 1                   | Child 2              |                                                  |
| Y1_11           | <p>Other than breast milk, how many times did [NAME] drink other milk, formula or yogurt yesterday, during the day or night?</p> <p>Do not include number of times the child was breastfed in this question. This variable is only to capture milk or milk products <b>other than breast milk</b></p>                                                                          | <input type="text"/>      | <input type="text"/> | <p>Number of times<br/>Not given yet..... 99</p> |
| Y1_12           | <p>How many times did [NAME] eat solid, semi-solid or soft foods other than liquids yesterday, during the day or night?</p> <p><b>Semi-solid</b> foods such as soft rice, mashed potato, ripe banana, other mashed family foods etc. <b>Solid</b> foods such as rice, wheat, puffed/pressed rice etc.<br/>Meals include both meals and snacks (other than trivial amounts)</p> | <input type="text"/>      | <input type="text"/> | <p>Number of times<br/>Not given yet.....99</p>  |
| Y1_12a          | <p>Of the cooked foods that you fed the child yesterday, could you tell us about how many baati's (show the measuring cup) you offered the child to eat yesterday?</p> <p>Please think of the total amount of food the child was given and convert it into milliliters. .</p>                                                                                                  | <input type="text"/>      | <input type="text"/> | <p>Milliliter<br/>Not given yet.....9999</p>     |

Household Number:

Yesterday (during the day or the night) did you give any of the following liquids to the child?  
 Please describe everything that (**NAME**) drank yesterday during the day or night, whether at home or outside the home.  
 a) Think about when (**NAME**) first woke up yesterday. Did (**NAME**) drink anything at that time? If yes: Please tell me everything (**NAME**) drank at that time. Probe: Anything else? Until respondent says nothing else. If no, continue to Question b).  
 b) What did (**NAME**) do after that? Did (**NAME**) drink anything at that time?  
 If yes: Please tell me everything (**NAME**) drank at that time. Probe: Anything else? Until respondent says nothing else.  
 Repeat question b) above until respondent says the child went to sleep until the next day.

Once the respondent finishes recalling foods eaten, read each food group where '1' was not circled, ask the following question and Circle '1' if respondent says yes, '2' if no and '99' if don't know:

| Question Number | Questions                                                                                       | Youngest child <24 months |                                                                             |                      |                                                                        | Code                    |
|-----------------|-------------------------------------------------------------------------------------------------|---------------------------|-----------------------------------------------------------------------------|----------------------|------------------------------------------------------------------------|-------------------------|
|                 |                                                                                                 | Child 1                   |                                                                             | Child 2              |                                                                        |                         |
|                 |                                                                                                 | Yesterday                 | Has the child ever been fed this liquid? (ask only if child 0-6 months old) | Yesterday            | Has the child ever been fed liquid? (ask only if child 0-6 months old) |                         |
| Y1_13           | Yesterday (during the day or the night) did you give any of the following liquids to the child? |                           |                                                                             |                      |                                                                        |                         |
| Y1_13a          | Breast milk                                                                                     | <input type="text"/>      | <input type="text"/>                                                        | <input type="text"/> | <input type="text"/>                                                   | Yes.....1<br>No ..... 2 |
| Y1_13b          | Water                                                                                           | <input type="text"/>      | <input type="text"/>                                                        | <input type="text"/> | <input type="text"/>                                                   |                         |
| Y1_13c          | Baby formula (prepared food for child)                                                          | <input type="text"/>      | <input type="text"/>                                                        | <input type="text"/> | <input type="text"/>                                                   |                         |
| Y1_13d          | Any other kind of milk (powder, cow/goat milk etc.)                                             | <input type="text"/>      | <input type="text"/>                                                        | <input type="text"/> | <input type="text"/>                                                   |                         |
| Y1_13e          | Fruit juice (made at home)                                                                      | <input type="text"/>      | <input type="text"/>                                                        | <input type="text"/> | <input type="text"/>                                                   |                         |
| Y1_13f          | Fruit juice (purchased, packaged)                                                               | <input type="text"/>      | <input type="text"/>                                                        | <input type="text"/> | <input type="text"/>                                                   |                         |
| Y1_13g          | Water-based liquids, teas, sugar water, coffee                                                  | <input type="text"/>      | <input type="text"/>                                                        | <input type="text"/> | <input type="text"/>                                                   |                         |
| Y1_14           | Yesterday (during the day and the night), did you use a baby bottle to feed the child?          | <input type="text"/>      | <input type="text"/>                                                        | <input type="text"/> | <input type="text"/>                                                   | Yes.....1<br>No ..... 2 |

Did your child eat (or drink) any of the following foods yesterday (during the day or night)?  
 Please describe everything that (NAME) ate yesterday during the day or night, whether at home or outside the home.  
 a) Think about when (NAME) first woke up yesterday. Did (NAME) eat anything at that time? If yes: Please tell me everything (NAME) ate at that time. Probe: Anything else? Until respondent says nothing else. If no, continue to Question b).  
 b) What did (NAME) do after that? Did (NAME) eat anything at that time?  
 If yes: Please tell me everything (NAME) ate at that time. Probe: Anything else? Until respondent says nothing else.  
 Repeat question b) above until respondent says the child went to sleep until the next day.  
 If respondent mentions mixed dishes like a PORRIDGE, sauce or stew, probe:  
 c) What ingredients were in that (MIXED DISH)? Probe: Anything else? Until respondent says nothing else.  
 As the respondent recalls foods, underline the corresponding food and circle '1' in the column next to the food group. If the food is not listed in any of the food groups below, write the food in the box labeled 'other foods'. If foods are used in small amounts for seasoning or as a condiment, include them under the condiments food group.

Household Number:

Once the respondent finishes recalling foods eaten, read each food group where '1' was not circled, ask the following question and Circle '1' if respondent says yes, '2' if no and '8' if don't know:

| Question Number | Questions                                                                                                                    | Youngest child <24 months |                                                                                |           |                                                                                | Code                    |
|-----------------|------------------------------------------------------------------------------------------------------------------------------|---------------------------|--------------------------------------------------------------------------------|-----------|--------------------------------------------------------------------------------|-------------------------|
|                 |                                                                                                                              | Child 1                   |                                                                                | Child 2   |                                                                                |                         |
|                 |                                                                                                                              | Yesterday                 | Has the child ever been fed this liquid?<br>(ask only if child 0-6 months old) | Yesterday | Has the child ever been fed this liquid?<br>(ask only if child 0-6 months old) |                         |
| Y1_15           | Did your child eat (or drink) any of the following foods yesterday (during the day or night)?                                |                           |                                                                                |           |                                                                                |                         |
| Y1_15a          | Rice                                                                                                                         |                           |                                                                                |           |                                                                                | Yes .... 1<br>No..... 2 |
| Y1_15b          | Cereals such as wheat, pressed rice, puffed rice, suji                                                                       |                           |                                                                                |           |                                                                                |                         |
| Y1_15c          | Purchased baby cereals (NAME: such as <b>Cerelac</b> )<br>Add name of most common food that iron fortified. Country specific |                           |                                                                                |           |                                                                                |                         |
| Y1_15d          | Legume: daal                                                                                                                 |                           |                                                                                |           |                                                                                |                         |
| Y1_15e          | Green leafy vegetables                                                                                                       |                           |                                                                                |           |                                                                                |                         |
| Y1_15f          | Pumpkin, orange yam, orange-red-flesh sweet potatoes, carrots, tomato (vitamin-A rich)                                       |                           |                                                                                |           |                                                                                |                         |
| Y1_15g          | Any other vegetables (starchy vegetables: potatoes, yam, plantain)                                                           |                           |                                                                                |           |                                                                                |                         |
| Y1_15h          | Ripe papaya or mango                                                                                                         |                           |                                                                                |           |                                                                                |                         |
| Y1_15i          | Other fruits such as oranges, banana, grapefruits                                                                            |                           |                                                                                |           |                                                                                |                         |
| Y1_15j          | Any other fruits                                                                                                             |                           |                                                                                |           |                                                                                |                         |
| Y1_15k          | Meat such as beef, mutton                                                                                                    |                           |                                                                                |           |                                                                                |                         |
| Y1_15l          | Chicken, duck, pigeon                                                                                                        |                           |                                                                                |           |                                                                                |                         |
| Y1_15m          | Liver, heart, kidneys                                                                                                        |                           |                                                                                |           |                                                                                |                         |
| Y1_15n          | Fish                                                                                                                         |                           |                                                                                |           |                                                                                |                         |
| Y1_15o          | Eggs                                                                                                                         |                           |                                                                                |           |                                                                                |                         |
| Y1_15p          | Peanuts, groundnuts, other nuts                                                                                              |                           |                                                                                |           |                                                                                |                         |
| Y1_15q          | Milk (non-human milk – cow, goat or powder)                                                                                  |                           |                                                                                |           |                                                                                |                         |
| Y1_15r          | Milk products (yogurt, rice pudding etc.)                                                                                    |                           |                                                                                |           |                                                                                |                         |
| Y1_15s          | Fat (oil, butter, ghee)                                                                                                      |                           |                                                                                |           |                                                                                |                         |
| Y1_15t          | Chips or chanachur                                                                                                           |                           |                                                                                |           |                                                                                |                         |
| Y1_15u          | Bread or buns                                                                                                                |                           |                                                                                |           |                                                                                |                         |
| Y1_15v          | Candies or chocolates                                                                                                        |                           |                                                                                |           |                                                                                |                         |
| Y1_15v1         | Biscuits                                                                                                                     |                           |                                                                                |           |                                                                                |                         |
| Y1_15w1         | Nutrient Powder/ Vitamin Sprinkles (Micronutrients, Monimix, MyMix, Pustika etc.)                                            |                           |                                                                                |           |                                                                                |                         |
| Y1_15w          | Any iron containing tablet                                                                                                   |                           |                                                                                |           |                                                                                |                         |
| Y1_15x          | Spices                                                                                                                       |                           |                                                                                |           |                                                                                |                         |
| Y1_15y          | Others (Specify)                                                                                                             |                           |                                                                                |           |                                                                                |                         |

Household Number:

| Question Number | Questions                                                                                               | Youngest child <24 months                                                        |                                                                                  | Code                                                                                                                                                                     |                                                                                                                                                                                      |
|-----------------|---------------------------------------------------------------------------------------------------------|----------------------------------------------------------------------------------|----------------------------------------------------------------------------------|--------------------------------------------------------------------------------------------------------------------------------------------------------------------------|--------------------------------------------------------------------------------------------------------------------------------------------------------------------------------------|
|                 |                                                                                                         | Child 1                                                                          | Child 2                                                                          |                                                                                                                                                                          |                                                                                                                                                                                      |
| Y1_15_1         | In the past 1 month, did you face any problems feeding your child?                                      | <input type="checkbox"/>                                                         | <input type="checkbox"/>                                                         | Yes.....1<br>No.....2>>Y1_16                                                                                                                                             |                                                                                                                                                                                      |
| Y1_15_2         | What kind of problems do you currently face?<br>(Multiple response possible)<br>[bring up to 3 answers] | <input type="checkbox"/><br><input type="checkbox"/><br><input type="checkbox"/> | <input type="checkbox"/><br><input type="checkbox"/><br><input type="checkbox"/> | Problems with breast (pain).....1<br>Child does not suck well.....2<br>Not able to breastfeed well.....3<br>Not enough time to feed child.....4<br>Cracked nipples.....5 | Feel not enough breast milk.....6<br>Poor appetite.....7<br>Child runs around too much.....8<br>Child does not like solid foods.....9<br>Child sick.....10<br>Other (specify).....77 |
| Y1_15_3         | Did you seek help from anyone to help address this problem?                                             | <input type="checkbox"/>                                                         | <input type="checkbox"/>                                                         | Yes.....1<br>No.....2>>Y1_16                                                                                                                                             |                                                                                                                                                                                      |

Household Number:

| Question Number | Questions                                                   | Youngest child <24 months |                                 | Code |                                       |    |                                           |
|-----------------|-------------------------------------------------------------|---------------------------|---------------------------------|------|---------------------------------------|----|-------------------------------------------|
|                 |                                                             | Child 1                   | Child 2                         |      |                                       |    |                                           |
| Y1_15_4         | Who did you seek help from?<br>(Multiple response possible) | <input type="checkbox"/>  | <input type="checkbox"/>        | 1    | Govt. Hospital/Upazila Health Complex | 15 | Spiritual Healer                          |
|                 |                                                             |                           |                                 | 2    | Doctor                                | 16 | Pharmacy                                  |
|                 |                                                             |                           |                                 | 3    | Midwife/nurse                         | 17 | Husband                                   |
|                 |                                                             |                           |                                 | 4    | Govt. Health Worker (FWA/HA)          | 18 | Mother/Mother in law                      |
|                 |                                                             |                           |                                 | 5    | MA/SACMO                              | 19 | Other Family members                      |
|                 |                                                             |                           |                                 | 6    | BRAC SS                               | 20 | Neighbors/ Friends                        |
|                 |                                                             |                           |                                 | 7    | BRAC SK                               | 21 | Private Hospital/ Clinic                  |
|                 |                                                             |                           |                                 | 8    | BRAC Pushti Kormi (PK)/YCF Promoter   | 22 | Mother and Children Welfare Centre (MCWC) |
|                 |                                                             |                           |                                 | 9    | Others NGO Worker                     | 23 | Community Clinic                          |
|                 |                                                             |                           |                                 | 10   | TTBA                                  | 24 | Satellite Clinic/ EPI Center              |
|                 |                                                             |                           |                                 | 11   | TBA                                   | 25 | Smiling Sun Clinic                        |
|                 |                                                             |                           |                                 | 12   | Village Doctor                        | 26 | Self                                      |
|                 |                                                             |                           |                                 | 13   | Homeopath Doctor                      | 27 | Nobody                                    |
|                 |                                                             |                           |                                 | 14   | Kabiraj/Herbal healer                 | 77 | Other (specify)                           |
|                 |                                                             |                           | Do Not Know/ Do Not Remember 88 |      |                                       |    |                                           |

Household Number:

|                |                                                                                                                 |                                                                                           |                                                                                           |                                                                                                                                                                                                                                                                                                                                                                                                                                                                                                                                                                                                                                                                                                                                                                                                                                                                              |                                                                                                                                                                                                                                                                                                                                                                                                                                                                                                                                                                                                                                                                                                                                                                                                                                                                                       |
|----------------|-----------------------------------------------------------------------------------------------------------------|-------------------------------------------------------------------------------------------|-------------------------------------------------------------------------------------------|------------------------------------------------------------------------------------------------------------------------------------------------------------------------------------------------------------------------------------------------------------------------------------------------------------------------------------------------------------------------------------------------------------------------------------------------------------------------------------------------------------------------------------------------------------------------------------------------------------------------------------------------------------------------------------------------------------------------------------------------------------------------------------------------------------------------------------------------------------------------------|---------------------------------------------------------------------------------------------------------------------------------------------------------------------------------------------------------------------------------------------------------------------------------------------------------------------------------------------------------------------------------------------------------------------------------------------------------------------------------------------------------------------------------------------------------------------------------------------------------------------------------------------------------------------------------------------------------------------------------------------------------------------------------------------------------------------------------------------------------------------------------------|
| <p>Y1_15_5</p> | <p>What feeding advice did the person give you?<br/>(Multiple response possible)<br/>[bring upto 2 answers]</p> | <p><input type="checkbox"/><br/><input type="checkbox"/><br/><input type="checkbox"/></p> | <p><input type="checkbox"/><br/><input type="checkbox"/><br/><input type="checkbox"/></p> | <p>1 Showed how to hold the baby and attach baby's mouth to breast during breast feeding<br/>.....<br/>1<br/>Give pressed breast milk when the mother stays away from the baby<br/>.....<br/>2<br/>Give the child only breast milk for the first 6 months<br/>.....<br/>3<br/>Continue breastfeeding the child up to 2 years<br/>.....<br/>4<br/>Breastfeed more often<br/>.....<br/>5<br/>Give child other milk (cow/goat/buffalo milk)<br/>.....<br/>6<br/>Give infant formula or powder milk (Nan, Cerelac, Lactogen, Horlicks)<br/>.....<br/>7<br/>Give sooji/gruels mixed with milk<br/>.....<br/>8<br/>Give Khichuri<br/>.....<br/>9<br/>Give mashed family food<br/>.....<br/>10<br/>Give animal source food (egg, fish, chicken, liver)<br/>.....<br/>11<br/>Give vitamin/supplementary food<br/>.....<br/>12<br/>Give favorite nutritious food<br/>.....<br/>13</p> | <p>Give favorite nutritious food<br/>.....<br/>13<br/>Advise to feed frequently<br/>.....<br/>14<br/>Give an extra meal for 2 weeks after the child recovers from an illness<br/>.....<br/>15<br/>Give ORS/home prepared solution<br/>.....<br/>16<br/>Feed less than usual<br/>.....<br/>17<br/>Give syrups<br/>.....<br/>18<br/>Give traditional medicine<br/>.....<br/>19<br/>Give treated water<br/>.....<br/>20<br/>Give carrot juice or rice water<br/>.....<br/>21<br/>DO NOT give other milk or any food to the child other than breast milk until a child is 6 months old<br/>.....<br/>22<br/>DO NOT give infant formula or powder milk(Nan, Cerelac, Lactogen, Horlicks)<br/>.....<br/>23<br/>DO NOT give Khichuri<br/>.....<br/>24<br/>DO NOT give mashed family food<br/>.....<br/>25<br/>DO NOT give animal source food(egg, fish, chicken, liver)<br/>.....<br/>26</p> |
|----------------|-----------------------------------------------------------------------------------------------------------------|-------------------------------------------------------------------------------------------|-------------------------------------------------------------------------------------------|------------------------------------------------------------------------------------------------------------------------------------------------------------------------------------------------------------------------------------------------------------------------------------------------------------------------------------------------------------------------------------------------------------------------------------------------------------------------------------------------------------------------------------------------------------------------------------------------------------------------------------------------------------------------------------------------------------------------------------------------------------------------------------------------------------------------------------------------------------------------------|---------------------------------------------------------------------------------------------------------------------------------------------------------------------------------------------------------------------------------------------------------------------------------------------------------------------------------------------------------------------------------------------------------------------------------------------------------------------------------------------------------------------------------------------------------------------------------------------------------------------------------------------------------------------------------------------------------------------------------------------------------------------------------------------------------------------------------------------------------------------------------------|



Household Number:

| Question Number | Questions                               | Youngest child <24 months |                          | Code                     |  |
|-----------------|-----------------------------------------|---------------------------|--------------------------|--------------------------|--|
|                 |                                         | Child 1                   | Child 2                  |                          |  |
|                 |                                         |                           |                          | Others (specify) .....77 |  |
| Y1_15_6         | Did they suggest any baby food/formula? | <input type="checkbox"/>  | <input type="checkbox"/> | Yes.....1<br>No.....2    |  |

MICRONUTRIENTS POWDER RELATED QUESTIONS

| Question Number | Questions                                                                                                           | Youngest child <24 months |                          |                          |                          |                          |                          | Code                                                                   |
|-----------------|---------------------------------------------------------------------------------------------------------------------|---------------------------|--------------------------|--------------------------|--------------------------|--------------------------|--------------------------|------------------------------------------------------------------------|
|                 |                                                                                                                     | Child 1                   |                          |                          | Child 2                  |                          |                          |                                                                        |
| Y1_16           | Have you ever heard of a powder called Sprinkles/ (show example packets) for putting in the food of young children? | <input type="checkbox"/>  |                          |                          | <input type="checkbox"/> |                          |                          | Yes.....1<br>No.....2>>Y1_31<br>Don't remember/don't know.....88>Y1_31 |
| Y1_16a          | Which powder have you heard about?                                                                                  | Pustikona                 | Monimix                  | Other (please specify)   | Pustikona                | Monimix                  | Other (please specify)   | Yes.....1<br>No.....2                                                  |
|                 |                                                                                                                     | <input type="checkbox"/>  | <input type="checkbox"/> | <input type="checkbox"/> | <input type="checkbox"/> | <input type="checkbox"/> | <input type="checkbox"/> |                                                                        |

Household Number:

| Question Number | Questions                                                                                                          | Youngest child <24 months |                          |                          |                          |                          |                          | Code                                                                                                                                                                                                                                                                                                                                                                                                                                                                                                                                                                                                                                       |
|-----------------|--------------------------------------------------------------------------------------------------------------------|---------------------------|--------------------------|--------------------------|--------------------------|--------------------------|--------------------------|--------------------------------------------------------------------------------------------------------------------------------------------------------------------------------------------------------------------------------------------------------------------------------------------------------------------------------------------------------------------------------------------------------------------------------------------------------------------------------------------------------------------------------------------------------------------------------------------------------------------------------------------|
|                 |                                                                                                                    | Child 1                   |                          |                          | Child 2                  |                          |                          |                                                                                                                                                                                                                                                                                                                                                                                                                                                                                                                                                                                                                                            |
| Y1_17           | Where did you hear about this?<br>(multiple answers possible)                                                      | <input type="checkbox"/>  | <input type="checkbox"/> | <input type="checkbox"/> | <input type="checkbox"/> | <input type="checkbox"/> | <input type="checkbox"/> | Television/radio advertisement.....1<br>Pharmacy/ shop in village.....2<br>Doctor (MBBS/ Village).....3<br>BRAC Health Worker<br>(SS/PS/SK./PK/PO).....4<br>From other NGO workers.....5<br>From neighbor or family member.....6<br>Hospital.....7<br>Other .....77                                                                                                                                                                                                                                                                                                                                                                        |
| Y1_18           | Was (NAME) <b>EVER</b> given food mixed with micronutrient powder/ vitamin powder?                                 | <input type="checkbox"/>  |                          |                          | <input type="checkbox"/> |                          |                          | Yes..... 1>>Y1_18b<br>No..... 2                                                                                                                                                                                                                                                                                                                                                                                                                                                                                                                                                                                                            |
| Y1_18a          | Why was (NAME) never given micronutrient powder/ vitamin powder?<br>(multiple answers possible)                    | <input type="checkbox"/>  |                          |                          | <input type="checkbox"/> |                          |                          | Don't think that it is useful for the child ..... 1<br>Child doesn't like Pushtikona ..... 2<br>Child gets constipation/black stool ..... 3<br>Child gets stomach ache..... 4<br>Not affordable/too expensive ..... 5<br>Family barriers/family members discourage ..... 6<br>It is medicine, only needed if child is ill ..... 7<br>It is like sugar, not needed ..... 8<br>Doctor/SS/Other health official did not prescribe ..... 9<br>Buy another brand of MNP (Monimix, Mymix etc.) ..... 10<br>Received it for free..... 11<br>The child is still less than 6 months old ..... 12<br>Others (specify)..... 77<br>Don't know ..... 99 |
| Y1_18b          | Which of these micronutrients [NAME on the side] was given to child?                                               | <input type="checkbox"/>  |                          |                          | <input type="checkbox"/> |                          |                          | Pushtikona..... 1<br>Monimix ..... 2<br>MyMix ..... 3<br>Pushtika..... 4<br>Other .....77                                                                                                                                                                                                                                                                                                                                                                                                                                                                                                                                                  |
| Y1_19           | Was (NAME) never given micronutrient powder/ vitamin powder in the past month?                                     | <input type="checkbox"/>  |                          |                          | <input type="checkbox"/> |                          |                          | Yes..... 1<br>No..... 2                                                                                                                                                                                                                                                                                                                                                                                                                                                                                                                                                                                                                    |
| Y1_20           | During the past 7 days, on how many days did you mix micronutrient powder with food for (NAME)?                    | <input type="checkbox"/>  |                          |                          | <input type="checkbox"/> |                          |                          | Days<br>Don't know/don't remember.....88                                                                                                                                                                                                                                                                                                                                                                                                                                                                                                                                                                                                   |
| Y1_22           | Did you <u>receive</u> packets of micronutrient powders from anyone or any program at any time in last six months? | <input type="checkbox"/>  |                          |                          | <input type="checkbox"/> |                          |                          | Yes ..... 1<br>No ..... 2>>Y1_25<br>Don't remember/don't know. 88>> Y1_25                                                                                                                                                                                                                                                                                                                                                                                                                                                                                                                                                                  |

Household Number:

| Question Number | Questions                                                                                                                                                                                                   | Youngest child <24 months                                                              |                                                                                        | Code                                                                                                                                                                                                                                                                              |
|-----------------|-------------------------------------------------------------------------------------------------------------------------------------------------------------------------------------------------------------|----------------------------------------------------------------------------------------|----------------------------------------------------------------------------------------|-----------------------------------------------------------------------------------------------------------------------------------------------------------------------------------------------------------------------------------------------------------------------------------|
|                 |                                                                                                                                                                                                             | Child 1                                                                                | Child 2                                                                                |                                                                                                                                                                                                                                                                                   |
| Y1_23           | Where did you receive these packets of micronutrient powders from?<br>(multiple answers possible)                                                                                                           | <input type="text"/><br><input type="text"/>                                           | <input type="text"/><br><input type="text"/>                                           | BRAC SS ..... 1<br>Other BRAC health workers(SK/PK/PO) ..... 2<br>SMC/other health workers ..... 3<br>Pharmacy ..... 4<br>Local shop..... 5<br>Doctor's Chamber..... 6<br>Company's Medical Representative..... 7<br>Others (specify)..... 77                                     |
| Y1_24           | How many packets did you receive in the last six months?                                                                                                                                                    | <input type="text"/>                                                                   | <input type="text"/>                                                                   | Number<br>Don't remember/don't know..... 88                                                                                                                                                                                                                                       |
| Y1_25           | Did you <u>purchase</u> packets of micronutrient powders any time in last six months?                                                                                                                       | <input type="text"/>                                                                   | <input type="text"/>                                                                   | Yes ..... 1<br>No ..... 2<br>Don't remember/don't know ..... 88                                                                                                                                                                                                                   |
| Y1_26           | Did you <u>purchase</u> packets of micronutrient powders any time in last one month?                                                                                                                        | <input type="text"/>                                                                   | <input type="text"/>                                                                   | Yes ..... 1<br>No ..... 2 >> Y1_28<br>Don't remember/don't know ..... 88 >> Y1_28                                                                                                                                                                                                 |
| Y1_27           | How many packets of micronutrient powders did you <u>purchase</u> in last one month?                                                                                                                        | <input type="text"/>                                                                   | <input type="text"/>                                                                   | Number<br>Don't remember/don't know..... 88                                                                                                                                                                                                                                       |
| Y1_28           | Where did you buy micronutrient powders from the last time you purchased micronutrient powders?                                                                                                             | <input type="text"/>                                                                   | <input type="text"/>                                                                   | BRAC SS ..... 1<br>other BRAC health workers(SK/PK/PO) ..... 2<br>SMC/other health workers ..... 3<br>Pharmacy ..... 4<br>Local shop..... 5<br>Doctor's chamber..... 6<br>Company's Medical Representative..... 7<br>Others (specify)..... 77<br>Did not purchase ..... 99>>Y1_30 |
| Y1_29           | What was the price of each packet of micronutrient powder?                                                                                                                                                  | <input type="text"/>                                                                   | <input type="text"/>                                                                   | Taka                                                                                                                                                                                                                                                                              |
| Y1_30           | Which members of your family consumed Sprinkles in the last one week?<br>[bring up to 4 answers]                                                                                                            | <input type="text"/> <input type="text"/><br><input type="text"/> <input type="text"/> | <input type="text"/> <input type="text"/><br><input type="text"/> <input type="text"/> | Member ID<br>No family member consumed in last 1 week ..... 98                                                                                                                                                                                                                    |
| Y1_31           | Did you ever purchase <u>any other</u> vitamins or mineral supplements in last six months?<br><br>Give examples of locally available vitamins/minerals; <u>note this is other than micronutrient powder</u> | <input type="text"/>                                                                   | <input type="text"/>                                                                   | Yes ..... 1<br>No ..... 2<br>Don't remember/don't know.....88                                                                                                                                                                                                                     |

Household Number:

| Question Number | Questions                                                                                                           | Youngest child <24 months                                                              |                                                                                        | Code                                                                                                                     |
|-----------------|---------------------------------------------------------------------------------------------------------------------|----------------------------------------------------------------------------------------|----------------------------------------------------------------------------------------|--------------------------------------------------------------------------------------------------------------------------|
|                 |                                                                                                                     | Child 1                                                                                | Child 2                                                                                |                                                                                                                          |
| Y1_32           | Did you purchase any vitamin or mineral supplements in last one month?                                              | <input type="text"/>                                                                   | <input type="text"/>                                                                   | Yes ..... 1<br>No ..... 2 >>Y1_35<br>Don't remember/don't know.....88>>Y1_35                                             |
| Y1_33           | Can you tell us the name of the vitamin/mineral supplement you bought?                                              | <input type="text"/><br><input type="text"/>                                           | <input type="text"/><br><input type="text"/>                                           | Vitamin/Mineral 1 _____<br>Vitamin/Mineral 2 _____<br>Don't know name.....88<br>Did not purchase ..... 9999>>Next Module |
| Y1_34           | Was the empty bottle of vitamin/Mineral/packet checked?                                                             | <input type="text"/>                                                                   | <input type="text"/>                                                                   | Yes ..... 1<br>No ..... 2<br>Did not purchase in last 1 month.....99                                                     |
| Y1_35           | Which members of your family consumed the vitamin/mineral supplements in the last one week? [bring up to 4 answers] | <input type="text"/> <input type="text"/><br><input type="text"/> <input type="text"/> | <input type="text"/> <input type="text"/><br><input type="text"/> <input type="text"/> | Member ID<br>None of the family member consumed in last 1 week.....98                                                    |

Household Number:

**Module Y2: Nutrition (IYCF) Knowledge of Respondent Mothers (Female)**

| Question Number | Questions                                                                                                 | Response             | Code                                                                                                                                                                                                                                                                                                                                                                                                                                                             |
|-----------------|-----------------------------------------------------------------------------------------------------------|----------------------|------------------------------------------------------------------------------------------------------------------------------------------------------------------------------------------------------------------------------------------------------------------------------------------------------------------------------------------------------------------------------------------------------------------------------------------------------------------|
| <b>Y2_00</b>    | According to you, when can you start giving a young child the following foods?                            |                      |                                                                                                                                                                                                                                                                                                                                                                                                                                                                  |
| <b>1</b>        | Water                                                                                                     | <input type="text"/> | <= 1 Month of age ..... 0<br>At 1 Month of age ..... 1<br>At 2 Month of age ..... 2<br>At 3 Month of age ..... 3<br>At 4 Month of age ..... 4<br>At 5 Month of age ..... 5<br>At 6 Month of age ..... 6<br>At 7 Month of age ..... 7<br>At 8 Month of age ..... 8<br>At 9 Month of age ..... 9<br>At 10 Month of age ..... 10<br>At 11 Month of age ..... 11<br>At 12 Month of age ..... 12<br>Don't know/didn't answer ..... 88<br>Should not be given ..... 99 |
| <b>2</b>        | Rice, Bread, Pressed rice, Muri, sooji, etc.                                                              | <input type="text"/> |                                                                                                                                                                                                                                                                                                                                                                                                                                                                  |
| <b>3</b>        | Legume: daal, pulse, peas                                                                                 | <input type="text"/> |                                                                                                                                                                                                                                                                                                                                                                                                                                                                  |
| <b>4</b>        | Green leafy vegetables                                                                                    | <input type="text"/> |                                                                                                                                                                                                                                                                                                                                                                                                                                                                  |
| <b>5</b>        | Vegetables such as pumpkin, orange yam, orange-red-flesh sweet potatoes, carrots, tomato (vitamin-A rich) | <input type="text"/> |                                                                                                                                                                                                                                                                                                                                                                                                                                                                  |
| <b>6</b>        | Ripe papaya or mango                                                                                      | <input type="text"/> |                                                                                                                                                                                                                                                                                                                                                                                                                                                                  |
| <b>7</b>        | Bananas                                                                                                   | <input type="text"/> |                                                                                                                                                                                                                                                                                                                                                                                                                                                                  |
| <b>8</b>        | Beef, mutton                                                                                              | <input type="text"/> |                                                                                                                                                                                                                                                                                                                                                                                                                                                                  |
| <b>9</b>        | Chicken, duck, other poultry, chicken liver                                                               | <input type="text"/> |                                                                                                                                                                                                                                                                                                                                                                                                                                                                  |
| <b>10</b>       | Fish (Big)                                                                                                | <input type="text"/> |                                                                                                                                                                                                                                                                                                                                                                                                                                                                  |
| <b>11</b>       | Fish (Small)                                                                                              | <input type="text"/> |                                                                                                                                                                                                                                                                                                                                                                                                                                                                  |
| <b>12</b>       | Eggs                                                                                                      | <input type="text"/> |                                                                                                                                                                                                                                                                                                                                                                                                                                                                  |
| <b>13</b>       | Peanuts, groundnuts, other nuts                                                                           | <input type="text"/> |                                                                                                                                                                                                                                                                                                                                                                                                                                                                  |
| <b>14</b>       | Milk (cow, goat or powdered)                                                                              | <input type="text"/> |                                                                                                                                                                                                                                                                                                                                                                                                                                                                  |
| <b>15</b>       | Purchased snack foods (chips, biscuits, chanachur, Chocolate/candies etc.)                                | <input type="text"/> |                                                                                                                                                                                                                                                                                                                                                                                                                                                                  |
| <b>16</b>       | Other non-breast milk liquids (sugar/glucose water, tea, fruit juice etc.)                                | <input type="text"/> |                                                                                                                                                                                                                                                                                                                                                                                                                                                                  |
| <b>17</b>       | Semi-solid foods (soft rice, khichuri, mashed potato, ripe banana, other mashed family foods etc.)        | <input type="text"/> |                                                                                                                                                                                                                                                                                                                                                                                                                                                                  |
| <b>Y2_01</b>    | How soon after birth should a baby start breastfeeding?                                                   | <input type="text"/> | Immediately ..... 1<br>Less than 1 hour after delivery ..... 2<br>Some hours later but less than 24 hrs ..... 3<br>1 day later ..... 4<br>More than 1 day later ..... 5<br>Do not think baby should be breastfed ..... 6<br>Don't know ..... 88                                                                                                                                                                                                                  |

Household Number:

| Question Number | Questions                                                                                                                      | Response             | Code                                                                                                                                                                                                                                                                                                                |
|-----------------|--------------------------------------------------------------------------------------------------------------------------------|----------------------|---------------------------------------------------------------------------------------------------------------------------------------------------------------------------------------------------------------------------------------------------------------------------------------------------------------------|
| Y2_02           | What should a mother do with the “first milk” or colostrum?                                                                    | <input type="text"/> | Throw it away and start breastfeeding when the real milk comes in ..... 1<br>Give it to her baby by breastfeeding soon after birth ..... 2<br>Other (specify) ..... 3<br>Don’t know ..... 88                                                                                                                        |
| Y2_03           | How often should a baby breastfeed?                                                                                            | <input type="text"/> | Whenever baby wants ..... 1<br>When you see the baby is hungry ..... 2<br>When the baby cries ..... 3<br>Other (specify) ..... 4<br>Don’t know ..... 88                                                                                                                                                             |
| Y2_04           | If a mother thinks her baby is not getting enough breast milk, what should she do?                                             | <input type="text"/> | Breastfeed more often/more frequently ..... 1<br>Give other liquids/foods ..... 2<br>Mother needs to drink more water ..... 3<br>Mother needs to eat more food ..... 4<br>Other (specify) ..... 5<br>Eat food that increases milk production ..... 6<br>Feed the child with patience ..... 7<br>Don’t know ..... 88 |
| Y2_05           | Do you think that infants under 6 months of age should be given water if the weather is very hot?                              | <input type="text"/> | Yes ..... 1<br>No ..... 2<br>Don’t know ..... 88                                                                                                                                                                                                                                                                    |
| Y2_05a          | Do you think that a breastfeeding mother of an infant under 6 months of age should stop breastfeeding if she becomes pregnant? | <input type="text"/> | Yes ..... 1<br>No ..... 2<br>Don’t know ..... 88                                                                                                                                                                                                                                                                    |
| Y2_05b          | Until about what age should a baby be exclusively breastfed?                                                                   | <input type="text"/> | Months<br>Don’t know/Don’t remember ..... 88                                                                                                                                                                                                                                                                        |
| Y2_06           | At what age should a baby first start to receive liquids (including water) other than breast milk?                             | <input type="text"/> | Months<br>Don’t know ..... 88                                                                                                                                                                                                                                                                                       |
| Y2_07           | At what age should a baby first start to receive foods in addition to breast milk?                                             | <input type="text"/> | Months<br>Don’t know ..... 88                                                                                                                                                                                                                                                                                       |
| Y2_07a          | Until what age should a child be breastfed in addition to other food?                                                          | <input type="text"/> | Months<br>Don’t know ..... 88                                                                                                                                                                                                                                                                                       |
| Y2_08           | Name one thing that can happen to children if they do not get enough iron (either in their diet or via iron supplements).      | <input type="text"/> | Impaired learning ..... 1<br>Impaired development ..... 2<br>Lower height ..... 3<br>Weakened immune defense ..... 4<br>Feel tired ..... 5<br>Become anemic ..... 6<br>Other (specify) ..... 7<br>Don’t know ..... 88                                                                                               |
| Y2_09           | What seasoning (food item) is often fortified with iodine (a nutrient important for brain development)?                        | <input type="text"/> | Salt ..... 1<br>Other (specify) ..... 2<br>Don’t know ..... 88                                                                                                                                                                                                                                                      |

| Question Number | Questions                                                                                                                                        | Response                                                                                                                                                    | Code                                                                                                                                                                                                                                                                                                                                                                                                                                       |
|-----------------|--------------------------------------------------------------------------------------------------------------------------------------------------|-------------------------------------------------------------------------------------------------------------------------------------------------------------|--------------------------------------------------------------------------------------------------------------------------------------------------------------------------------------------------------------------------------------------------------------------------------------------------------------------------------------------------------------------------------------------------------------------------------------------|
| Y2_10           | For how long do children need an extra meal per day after they have been sick?<br><i>(a meal in addition to the ones they are fed usually)</i>   | Day <input type="text"/><br>Week <input type="text"/>                                                                                                       | Day/Week<br>Don't know ..... 88                                                                                                                                                                                                                                                                                                                                                                                                            |
| Y2_11a          | What should a mother do in regard to child feeding when a child aged less than 6 months has diarrhea?<br><br><i>(Multiple response possible)</i> | <input type="checkbox"/> <input type="checkbox"/><br><input type="checkbox"/> <input type="checkbox"/><br><input type="checkbox"/> <input type="checkbox"/> | Give ORS/home-prepared solution ..... 1<br>Feed less than usual ..... 2<br>Continue breastfeeding ..... 3<br>Breastfeed more often ..... 4<br>Give syrups ..... 5<br>Give traditional medicine ..... 6<br>Give treated water ..... 7<br>Give carrot juice or rice water ..... 8<br>Other: ..... 77<br>Don't know ..... 88                                                                                                                  |
| Y2_11b          | What should a mother do in regard to child feeding when a child aged more than 6 months has diarrhea?<br><br><i>(Multiple response possible)</i> | <input type="checkbox"/><br><input type="checkbox"/><br><input type="checkbox"/><br><input type="checkbox"/>                                                | Give ORS/home-prepared solution ..... 1<br>Feed less than usual ..... 2<br>Continue breastfeeding ..... 3<br>Breastfeed more often ..... 4<br>Give syrups ..... 5<br>Give traditional medicine ..... 6<br>Give treated water ..... 7<br>Give carrot juice or rice water ..... 8<br>Other: ..... 77<br>Don't know ..... 99                                                                                                                  |
| Y2_12           | When should you wash your hands?<br><br><i>(multiple answers possible)</i>                                                                       | <input type="checkbox"/><br><input type="checkbox"/><br><input type="checkbox"/><br><input type="checkbox"/>                                                | Before eating ..... 1<br>After using the toilet ..... 2<br>Before feeding the child ..... 3<br>After cleaning a child who has defecated ..... 4<br>Other (specify) ..... 5<br>Don't know ..... 88                                                                                                                                                                                                                                          |
| Y2_13           | What are some of the things we can do to encourage young children to eat their food?<br><br><i>(multiple answers possible)</i>                   | <input type="checkbox"/><br><input type="checkbox"/><br><input type="checkbox"/><br><input type="checkbox"/>                                                | Feed slowly and patiently ..... 1<br>Talk to the child ..... 2<br>Force the child ..... 3<br>Reduce distractions ..... 4<br>Feed other foods ..... 5<br>Change flavor of the food ..... 6<br>Give vitamins ..... 7<br>Take the child's mind off ..... 8<br>Start CF on time so child develops a habit ..... 9<br>Food should be mashed ..... 10<br>Maintain food consistency (concentration) ..... 11<br>Offer a variety of foods ..... 12 |

Household Number:

| Question Number | Questions                                                                                                                | Response                                                                                                     | Code                                                                                                                                                                                                                                                                                                                                                                                                                                                                                                                                                                   |
|-----------------|--------------------------------------------------------------------------------------------------------------------------|--------------------------------------------------------------------------------------------------------------|------------------------------------------------------------------------------------------------------------------------------------------------------------------------------------------------------------------------------------------------------------------------------------------------------------------------------------------------------------------------------------------------------------------------------------------------------------------------------------------------------------------------------------------------------------------------|
|                 |                                                                                                                          |                                                                                                              | Offer the child his/her favorite nutritious food ..... 13<br>Let the child eat with own hands (provided hands are washed) ..... 14<br>Avoid junk food (chips, packet juice etc.) ..... 15<br>Feed when child is hungry ..... 16<br>Encourage and praise the child ..... 17<br>Other (specify) ..... 77<br>Don't know ..... 88                                                                                                                                                                                                                                          |
| Y2_14           | What foods does a young child (<24 months) need in order to grow and develop their brain?<br>(multiple answers possible) | <input type="checkbox"/><br><input type="checkbox"/><br><input type="checkbox"/><br><input type="checkbox"/> | Gruels/bread/rice..... 1<br>Gruel with milk..... 2<br>Animal foods such as meat or chicken..... 3<br>Fish ..... 4<br>Eggs ..... 5<br>Fruits..... 6<br>Vegetables ..... 7<br>Milk ..... 8<br>Pulses (daal)..... 9<br>Other (specify) ..... 10<br>Don't know ..... 88                                                                                                                                                                                                                                                                                                    |
| Y2_14a          | Can you name some benefits of providing Pushtikona/micronutrient powder to children?<br>[multiple responses possible]    | <input type="checkbox"/><br><input type="checkbox"/><br><input type="checkbox"/>                             | Child will not be anemic. .... 1<br>Good for child's brains and intelligence/good in studies or school..... 2<br>Child will grow well (height or weight) ..... 3<br>Improved child development ..... 4<br>Increases child's appetite ..... 5<br>Child suffers less from illness..... 6<br>Child cries less..... 7<br>It has vitamins and minerals ..... 8<br>Prevents diarrhea ..... 9<br>Treats diarrhea ..... 10<br>Improves child's immune system ..... 11<br>Child is more energetic (feels less tired)..... 12<br>Others (Specify)..... 77<br>Don't know ..... 88 |
| Y2_14b          | How many sachets of Pushtikona should be fed to a child in 7days?                                                        | <input type="checkbox"/>                                                                                     | Number of sachets [___][___]<br>Don't know ..... 88<br>Never Fed ..... 99                                                                                                                                                                                                                                                                                                                                                                                                                                                                                              |
| Y2_14c          | How much of the Pushtikona sachet should be mixed with the child's food at one meal?                                     | <input type="checkbox"/>                                                                                     | Full sachet..... 1<br>Half sachet... ..... 2<br>Less than half sachet ..... 3<br>Others (specify) ..... 4<br>Don't know ..... 88                                                                                                                                                                                                                                                                                                                                                                                                                                       |
| Y2_14d          | Within how much time should the food after adding Pushtikona be fed to the child?                                        | <input type="checkbox"/>                                                                                     | Within 30 minutes..... 1<br>Others [___] mins ..... 2                                                                                                                                                                                                                                                                                                                                                                                                                                                                                                                  |



Household Number:

| Question Number | Questions                                                        | Response             | Code                                                                                                                                                                   |
|-----------------|------------------------------------------------------------------|----------------------|------------------------------------------------------------------------------------------------------------------------------------------------------------------------|
|                 |                                                                  |                      | Don't know ..... 88                                                                                                                                                    |
| <b>Y2_14e</b>   | How hot or cold should the food be when adding Pushtikona to it? | <input type="text"/> | Hot (just cooked)... ..... 1<br>Warm/room temperature (after cooking allow the food to cool)..... 2<br>Cold ..... 3<br>Others (specify) ..... 4<br>Don't know ..... 88 |

**Module Y3: Awareness-Trial-Adoption of Sentinel Practices (Female)**

| Question Number | I will now ask you about a few child feeding practices. Can you tell me if you have ever heard about any of the following child feeding practices? | A. Have you heard about....?<br>yes ..... 1>>B<br>No ..... 2>>Next row | B. If ans is 'yes' for A<br>Where did you hear about this?<br>Family Member ..... 1<br>Friend/neighbor ..... 2<br>Health worker ..... 3<br>Nurse/dispensary ... 4<br>Radio ..... 5<br>TV ..... 6<br>BRAC ..... 7<br>Religious Leader... 8<br>Health Center..... 9<br>Other (specify)..... 10 | C. Did you ever try this?<br>Yes.....1>>Next Row<br>No..... 2>>D | D. If ans is "No" for C, ask:<br>Can you tell me the main reason why you did not ever try this at home?<br>Next Qs. |          |
|-----------------|----------------------------------------------------------------------------------------------------------------------------------------------------|------------------------------------------------------------------------|----------------------------------------------------------------------------------------------------------------------------------------------------------------------------------------------------------------------------------------------------------------------------------------------|------------------------------------------------------------------|---------------------------------------------------------------------------------------------------------------------|----------|
|                 |                                                                                                                                                    |                                                                        |                                                                                                                                                                                                                                                                                              |                                                                  | Response                                                                                                            | Code     |
| <b>Y3_01</b>    | Starting breast feeding immediately after delivery within 1 hour?                                                                                  | <input type="text"/>                                                   | <input type="text"/>                                                                                                                                                                                                                                                                         | <input type="text"/>                                             | <input type="text"/>                                                                                                | Code 1↓  |
| <b>Y3_02</b>    | Not giving anything except breast milk to your child for six months                                                                                | <input type="text"/>                                                   | <input type="text"/>                                                                                                                                                                                                                                                                         | <input type="text"/>                                             | <input type="text"/>                                                                                                | Code 2 ↓ |
| <b>Y3_03</b>    | Feeding your baby mashed family foods in addition to breast feeding right at 7 months of age                                                       | <input type="text"/>                                                   | <input type="text"/>                                                                                                                                                                                                                                                                         | <input type="text"/>                                             | <input type="text"/>                                                                                                | Code 3↓  |
| <b>Y3_04</b>    | Feeding animal foods like fish, egg, liver, meat at least once a day? (for child more than 6 months old)                                           | <input type="text"/>                                                   | <input type="text"/>                                                                                                                                                                                                                                                                         | <input type="text"/>                                             | <input type="text"/>                                                                                                | Code 4↓  |
| <b>Y3_07</b>    | Adding Pushtikonia/Monimix/MyMix/Sprinkles to the child's food                                                                                     | <input type="text"/>                                                   | <input type="text"/>                                                                                                                                                                                                                                                                         | <input type="text"/>                                             | <input type="text"/>                                                                                                | Code 5↓  |

Household Number:

| Code 1                                  | Code 2                                | Code 3                               | Code 4                        | Code 5                        |
|-----------------------------------------|---------------------------------------|--------------------------------------|-------------------------------|-------------------------------|
| Do not know..... 1                      | Do not know..... 1                    | Child does not like it..... 1        | Do not know ..... 1           | Do not know .....1            |
| Insufficient breast milk ..... 2        | Mother did not want..... 2            | Not enough food at home ..... 2      | Child does not like it..... 2 | Child does not like it.....2  |
| Family members discouraged me 3         | Family members told me to feed        | Did not have required                | Did not have money ..... 3    | Did not have money .....3     |
| Other people discouraged me ..... 4     | something else..... 3                 | ingredients ..... 3                  | Fish, eggs, liver,            | Pushtikona too expensive ...4 |
| Doctor forbid me ..... 5                | Others told me to feed something else | Ingredients too expensive .....4     | meat too expensive ..... 4    | Child not old enough .....5   |
| Did not feel it to be necessary ..... 6 | ..... 4                               | Child not old enough ..... 5         | Child not old enough ..... 5  | Other (specify).....6         |
| Other (specify) ..... 7                 | Insufficient breast milk ..... 5      | Other (specify).....6                | Other (specify) ..... 6       | Did not feel it to be         |
|                                         | Other (specify) ..... 6               | Did not feel it to be necessary... 7 | Did not feel it to be         | necessary .....7              |
|                                         |                                       |                                      | necessary ..... 7             |                               |

Household Number:

**Module Y4: Immunization and Health Status of Young Children (<2 years) (Female)**

Instructions: To be asked for all children under the age of 24 months

Important note: finish asking all questions for the first child, and then ask the same set of questions for the younger child.

| Question number    | Question                                                                                                                                                                                                             | Child < 24 months                             |                                             |                         |                    | Response Code                                                                            |
|--------------------|----------------------------------------------------------------------------------------------------------------------------------------------------------------------------------------------------------------------|-----------------------------------------------|---------------------------------------------|-------------------------|--------------------|------------------------------------------------------------------------------------------|
|                    |                                                                                                                                                                                                                      | Child 1                                       |                                             | Child 2                 |                    |                                                                                          |
| Child's Member ID  | Copy the child's Name and ID from module B                                                                                                                                                                           | Name: _____<br>Mem. ID <input type="text"/>   | Name: _____<br>Mem. ID <input type="text"/> |                         |                    | Name and Member ID                                                                       |
| Mother's Member ID | Copy the child's mother's Name and ID from module B                                                                                                                                                                  | Name: _____<br>Member ID <input type="text"/> |                                             |                         |                    | Name and Member ID<br>If not member of HH, then record 55                                |
| Father's Member ID | Copy the child's father's Name and ID from module B                                                                                                                                                                  | Name: _____<br>Member ID <input type="text"/> |                                             |                         |                    | Name and Member ID<br>If not member of HH, then record 55                                |
| Y4_01              | Present age of child in months                                                                                                                                                                                       | <input type="text"/>                          | <input type="text"/>                        |                         |                    | Age in months                                                                            |
| Y4_02              | Gender of the child                                                                                                                                                                                                  | <input type="text"/>                          | <input type="text"/>                        |                         |                    | Boy..... 1<br>Girl.....2                                                                 |
| Y4_03              | Birth Order (number)                                                                                                                                                                                                 | <input type="text"/>                          | <input type="text"/>                        |                         |                    | Write the exact number birth order of the child.                                         |
| Y4_04              | If the child is over 6 months old, has the child received vitamin A capsule in last 6 month?                                                                                                                         | <input type="text"/>                          | <input type="text"/>                        |                         |                    | Yes ..... 1<br>No ..... 2<br>N/A (age < 6 months)..... 9<br>Don't Know/ Don't Remember88 |
| Y4_05              | <b>Immunization status of the child</b><br><i>Check health card (if available) and based on the immunization information given, fill up the following questions. If no card available, then ask mother of child.</i> | Child 1                                       |                                             | Child 2                 |                    |                                                                                          |
|                    | Which immunizations has the target child taken so far?                                                                                                                                                               |                                               |                                             |                         |                    |                                                                                          |
|                    | List of vaccination:                                                                                                                                                                                                 | <b>From Health Card</b>                       | <b>From Mother</b>                          | <b>From Health Card</b> | <b>From Mother</b> | Response Code                                                                            |
| Y4_05a             | BCG                                                                                                                                                                                                                  |                                               |                                             |                         |                    | Yes ..... 1<br>No ..... 2<br>N/A ..... 3                                                 |
| Y4_05b             | DPT 1                                                                                                                                                                                                                |                                               |                                             |                         |                    |                                                                                          |
| Y4_05c             | DPT 2                                                                                                                                                                                                                |                                               |                                             |                         |                    |                                                                                          |
| Y4_05d             | DPT 3                                                                                                                                                                                                                |                                               |                                             |                         |                    |                                                                                          |
| Y4_05e             | Hepatitis B 1                                                                                                                                                                                                        |                                               |                                             |                         |                    |                                                                                          |
| Y4_05f             | Hepatitis B 2                                                                                                                                                                                                        |                                               |                                             |                         |                    |                                                                                          |
| Y4_05g             | Hepatitis B 3                                                                                                                                                                                                        |                                               |                                             |                         |                    |                                                                                          |
| Y4_05h             | Penta (DPT, Hep-B, HIB) 1                                                                                                                                                                                            |                                               |                                             |                         |                    |                                                                                          |
| Y4_05i             | Penta (DPT, Hep-B, HIB) 2                                                                                                                                                                                            |                                               |                                             |                         |                    |                                                                                          |
| Y4_05j             | Penta (DPT, Hep-B, HIB) 3                                                                                                                                                                                            |                                               |                                             |                         |                    |                                                                                          |
| Y4_05k             | OPV 0 (at birth)                                                                                                                                                                                                     |                                               |                                             |                         |                    |                                                                                          |
| Y4_05l             | OPV (Polio) 1                                                                                                                                                                                                        |                                               |                                             |                         |                    |                                                                                          |
| Y4_05m             | OPV (Polio) 2                                                                                                                                                                                                        |                                               |                                             |                         |                    |                                                                                          |
| Y4_05n             | OPV (Polio) 3                                                                                                                                                                                                        |                                               |                                             |                         |                    |                                                                                          |
| Y4_05o             | Measles                                                                                                                                                                                                              |                                               |                                             |                         |                    |                                                                                          |
| Y4_05p             | Vitamin A                                                                                                                                                                                                            |                                               |                                             |                         |                    |                                                                                          |

Household Number:

**Child Illness and Use of Health Services**

| Serial | Question                                                                            | Response                 |                          |                                    |                          |                          |                          |                                    |                          | Code                                                         |
|--------|-------------------------------------------------------------------------------------|--------------------------|--------------------------|------------------------------------|--------------------------|--------------------------|--------------------------|------------------------------------|--------------------------|--------------------------------------------------------------|
|        |                                                                                     | Child 1                  |                          |                                    |                          | Child 2                  |                          |                                    |                          |                                                              |
|        |                                                                                     | Child of < 24 months     |                          |                                    |                          | Child of < 24 months     |                          |                                    |                          |                                                              |
|        |                                                                                     | A1                       | A2                       | A3                                 | A4                       | A1                       | A2                       | A3                                 | A4                       |                                                              |
|        |                                                                                     | Fever                    | Cough/cold               | Fast breathing/<br>short breathing | Diarrhea                 | Fever                    | Cough/cold               | Fast breathing/<br>short breathing | Diarrhea                 |                                                              |
| Y4_06  | Has (NAME) had any of the following symptoms in the past two weeks?                 | <input type="checkbox"/> | <input type="checkbox"/> | <input type="checkbox"/>           | <input type="checkbox"/> | <input type="checkbox"/> | <input type="checkbox"/> | <input type="checkbox"/>           | <input type="checkbox"/> | Yes ..... 1<br>No ..... 2>Y4_10<br>Don't Know ..... 88>Y4_10 |
| Y4_07  | Did you ask for advice or seek treatment when the child had (name illness/symptom)? | <input type="checkbox"/> | <input type="checkbox"/> | <input type="checkbox"/>           | <input type="checkbox"/> | <input type="checkbox"/> | <input type="checkbox"/> | <input type="checkbox"/>           | <input type="checkbox"/> | Yes ..... 1<br>No ..... 2>>Y4_09                             |

Household Number:

| Serial | Question                                                                                                                                                                                                                                                                                                                                                                      | Response             |                      |                      |                      |                      |                      |                      |                      | Code                                                                                                                                                                                                                                                                                                                                                                                                                                                                                                                                                                                                                                                                                                                                                                                                                                                          |
|--------|-------------------------------------------------------------------------------------------------------------------------------------------------------------------------------------------------------------------------------------------------------------------------------------------------------------------------------------------------------------------------------|----------------------|----------------------|----------------------|----------------------|----------------------|----------------------|----------------------|----------------------|---------------------------------------------------------------------------------------------------------------------------------------------------------------------------------------------------------------------------------------------------------------------------------------------------------------------------------------------------------------------------------------------------------------------------------------------------------------------------------------------------------------------------------------------------------------------------------------------------------------------------------------------------------------------------------------------------------------------------------------------------------------------------------------------------------------------------------------------------------------|
|        |                                                                                                                                                                                                                                                                                                                                                                               | Child 1              |                      |                      |                      | Child 2              |                      |                      |                      |                                                                                                                                                                                                                                                                                                                                                                                                                                                                                                                                                                                                                                                                                                                                                                                                                                                               |
|        |                                                                                                                                                                                                                                                                                                                                                                               | Child of < 24 months |                      |                      |                      | Child of < 24 months |                      |                      |                      |                                                                                                                                                                                                                                                                                                                                                                                                                                                                                                                                                                                                                                                                                                                                                                                                                                                               |
|        |                                                                                                                                                                                                                                                                                                                                                                               |                      |                      |                      |                      |                      |                      |                      |                      |                                                                                                                                                                                                                                                                                                                                                                                                                                                                                                                                                                                                                                                                                                                                                                                                                                                               |
| Y4_08  | <p>WHOM did you seek advice/medical help or treatment for this illness(Please specify each illness to the respondent) (multiple responses possible)</p> <p>Please ask about the FIRST point of care and enter that in top box. Then ask about SECOND point of care, and enter that in second box, and then finally, ask about THIRD point of care and enter in third box.</p> | <input type="text"/> | <input type="text"/> | <input type="text"/> | <input type="text"/> | <input type="text"/> | <input type="text"/> | <input type="text"/> | <input type="text"/> | Govt. Hospital/Upazila Health Complex ..... 1<br>Doctor ..... 2<br>Midwife/nurse ..... 3<br>Govt. Heath Worker (FWA/HA)..... 4<br>MA/SACMO..... 5<br>BRAC SS ..... 6<br>BRAC SK ..... 7<br>BRAC Pushti Kormi (PK)/TYCF Promoter ..... 8<br>Others NGO Worker ..... 9<br>TTBA ..... 10<br>TBA ..... 11<br>Village Doctor..... 12<br>Homeopath Doctor..... 13<br>Kabiraj/Herbal healer ..... 14<br>Spiritual Healer ..... 15<br>Pharmacy ..... 16<br>Husband ..... 17<br>Mother/Mother in law ..... 18<br>Other Family members..... 19<br>Neighbors/ Friends..... 20<br>Private Hospital/ Clinic ..... 21<br>Mother and Children Welfare Centre (MCWC) 22<br>Community Clinic..... 23<br>Satellite Clinic/ EPI Center ..... 24<br>Smiling Sun Clinic ..... 25<br>Self ..... 26<br>Nobody..... 27<br>Other (specify) ..... 77<br>Do Not Know/ Do Not Remember 88 |

Household Number:

| Serial | Question                                                                               | Response             |                      |                      |                      |                      |                      |                      |                      | Code                                                                                                                                                                                                                                                                                                                                                                                                                                                                                                                      |
|--------|----------------------------------------------------------------------------------------|----------------------|----------------------|----------------------|----------------------|----------------------|----------------------|----------------------|----------------------|---------------------------------------------------------------------------------------------------------------------------------------------------------------------------------------------------------------------------------------------------------------------------------------------------------------------------------------------------------------------------------------------------------------------------------------------------------------------------------------------------------------------------|
|        |                                                                                        | Child 1              |                      |                      |                      | Child 2              |                      |                      |                      |                                                                                                                                                                                                                                                                                                                                                                                                                                                                                                                           |
|        |                                                                                        | Child of < 24 months |                      |                      |                      | Child of < 24 months |                      |                      |                      |                                                                                                                                                                                                                                                                                                                                                                                                                                                                                                                           |
| Y4_081 | Where did this care provider sit?                                                      | <input type="text"/> | <input type="text"/> | <input type="text"/> | <input type="text"/> | <input type="text"/> | <input type="text"/> | <input type="text"/> | <input type="text"/> | Government hospital ..... 1<br>Upazila Health Complex ..... 2<br>Private clinic ..... 3<br>Pharmacy ..... 4<br>MCWC ..... 5<br>Community Clinic ..... 6<br>Satellite clinic/EPI Center ..... 7<br>Smiling Sun Clinic ..... 8<br>Union Health and Family Welfare Center ..... 9<br>NGO facility: (specify) ..... 10<br>Doctor's Chamber ..... 11<br>Private doctor (MBBS) ..... 12<br>Village doctor ..... 13<br>Home ..... 14<br>Other (specify) ..... 77<br>Don't know/cannot recall ..... 88<br>Not applicable ..... 99 |
| Y4_08b | Did the care provider take the NAME's weight when they examined him/her?               | <input type="text"/> | <input type="text"/> | <input type="text"/> | <input type="text"/> | <input type="text"/> | <input type="text"/> | <input type="text"/> | <input type="text"/> | Yes ..... 1<br>No ..... 2                                                                                                                                                                                                                                                                                                                                                                                                                                                                                                 |
| Y4_08c | Did the care provider ask how NAME was being fed when they examined him/her?           | <input type="text"/> | <input type="text"/> | <input type="text"/> | <input type="text"/> | <input type="text"/> | <input type="text"/> | <input type="text"/> | <input type="text"/> | Yes ..... 1<br>No ..... 2                                                                                                                                                                                                                                                                                                                                                                                                                                                                                                 |
| Y4_08d | Did the care provider give you any advice about child feeding when they examined NAME? | <input type="text"/> | <input type="text"/> | <input type="text"/> | <input type="text"/> | <input type="text"/> | <input type="text"/> | <input type="text"/> | <input type="text"/> | Yes ..... 1<br>No ..... 2 >> Y4_09                                                                                                                                                                                                                                                                                                                                                                                                                                                                                        |
| Y4_08e | What advice did the care provider give about feeding?                                  | <input type="text"/> | <input type="text"/> | <input type="text"/> | <input type="text"/> | <input type="text"/> | <input type="text"/> | <input type="text"/> | <input type="text"/> | Breastfeed more ..... 1<br>Feed other foods ..... 2<br>Give the child formula or tinned milk ..... 3<br>Give the child tonics or vitamins ..... 4<br>Other, specify ..... 9                                                                                                                                                                                                                                                                                                                                               |

Household Number:

| Serial | Question                                                                                                                                                                                               | Response             |  |  |                          |                      |  |  |                          | Code                                                                                                                                                          |
|--------|--------------------------------------------------------------------------------------------------------------------------------------------------------------------------------------------------------|----------------------|--|--|--------------------------|----------------------|--|--|--------------------------|---------------------------------------------------------------------------------------------------------------------------------------------------------------|
|        |                                                                                                                                                                                                        | Child 1              |  |  |                          | Child 2              |  |  |                          |                                                                                                                                                               |
|        |                                                                                                                                                                                                        | Child of < 24 months |  |  |                          | Child of < 24 months |  |  |                          |                                                                                                                                                               |
| Y4_09  | What did you give the child when he/she had diarrhea? (Select all that apply)                                                                                                                          |                      |  |  | <input type="checkbox"/> |                      |  |  | <input type="checkbox"/> | ORS(bought)..... 1<br>Zinc tablets ..... 2<br>Antibiotics ..... 3<br>Homemade ORS ..... 4<br>Traditional medicine ..... 5<br>Other ..... 6<br>Nothing ..... 7 |
| Y4_09a | I'd like to know how much NAME was given to DRINK during the diarrhea (including breastmilk)?<br>Was he/she given less than usual to eat, about the same amount, more than usual, or nothing to drink? |                      |  |  | <input type="checkbox"/> |                      |  |  | <input type="checkbox"/> | Nothing to drink..... 0<br>Much less ..... 1<br>Somewhat less ..... 2<br>About the same ..... 3<br>More ..... 4<br>Don't know ..... 8                         |
| Y4_09b | I'd like to know how much NAME was given to EAT during the diarrhea (including breastmilk)?<br>Was he/she given less than usual to eat, about the same amount, more than usual, or nothing to drink?   |                      |  |  | <input type="checkbox"/> |                      |  |  | <input type="checkbox"/> | Nothing to eat ..... 0<br>Much less ..... 1<br>Somewhat less ..... 2<br>About the same ..... 3<br>More ..... 4<br>Don't know ..... 8                          |
| Y4_10  | Was NAME ever treated in a health center or hospital because he/she was very malnourished?                                                                                                             |                      |  |  | <input type="checkbox"/> |                      |  |  | <input type="checkbox"/> | Yes ..... 1<br>No ..... 2                                                                                                                                     |
| Y4_11  | Was NAME ever given special foods like this (SHOW PACKET OF RUTF) to take home and eat for a few weeks because he/she was very malnourished?                                                           |                      |  |  | <input type="checkbox"/> |                      |  |  | <input type="checkbox"/> | Yes ..... 1<br>No ..... 2>>Y4_12                                                                                                                              |

Household Number:

| Serial | Question                                                        | Response             |                      | Code                                                                                                                                                                                                                                                                                                                                                                                                                                                                                                                                                                                                                                                                                                                                                                                                                                                            |
|--------|-----------------------------------------------------------------|----------------------|----------------------|-----------------------------------------------------------------------------------------------------------------------------------------------------------------------------------------------------------------------------------------------------------------------------------------------------------------------------------------------------------------------------------------------------------------------------------------------------------------------------------------------------------------------------------------------------------------------------------------------------------------------------------------------------------------------------------------------------------------------------------------------------------------------------------------------------------------------------------------------------------------|
|        |                                                                 | Child 1              | Child 2              |                                                                                                                                                                                                                                                                                                                                                                                                                                                                                                                                                                                                                                                                                                                                                                                                                                                                 |
|        |                                                                 | Child of < 24 months | Child of < 24 months |                                                                                                                                                                                                                                                                                                                                                                                                                                                                                                                                                                                                                                                                                                                                                                                                                                                                 |
| Y4_11a | Where did you get this special food (SHOW PACKET OF RUTF)?      | <input type="text"/> | <input type="text"/> | Govt. Hospital/Upazila Health Complex ..... 1<br>Doctor ..... 2<br>Midwife/nurse..... 3<br>Govt. Health Worker (FWA/HA)..... 4<br>MA/SACMO..... 5<br>BRAC SS..... 6<br>BRAC SK ..... 7<br>BRAC Pushti Kormi (PK)/IYCF Promoter ..... 8<br>Others NGO Worker ..... 9<br>TTBA..... 10<br>TBA ..... 11<br>Village Doctor ..... 12<br>Homeopath Doctor..... 13<br>Kabiraj/Herbal healer ..... 14<br>Spiritual Healer ..... 15<br>Pharmacy ..... 16<br>Husband ..... 17<br>Mother/Mother in law ..... 18<br>Other Family members..... 19<br>Neighbors/ Friends..... 20<br>Private Hospital/ Clinic..... 21<br>Mother and Children Welfare Centre (MCWC)..... 22<br>Community Clinic..... 23<br>Satellite Clinic/ EPI Center ..... 24<br>Smiling Sun Clinic..... 25<br>Self..... 26<br>Nobody ..... 27<br>Other (specify) ..... 77<br>Do Not Know/ Do Not Remember 88 |
| Y4_12  | Has NAME ever been given any medicines for deworming?           | <input type="text"/> | <input type="text"/> | Yes ..... 1<br>No ..... 2>>Next module                                                                                                                                                                                                                                                                                                                                                                                                                                                                                                                                                                                                                                                                                                                                                                                                                          |
| Y4_13  | When was the last time NAME was given a medicine for deworming? | <input type="text"/> | <input type="text"/> | [__] MONTHS AGO (*write 0 if less than 1 month ago)                                                                                                                                                                                                                                                                                                                                                                                                                                                                                                                                                                                                                                                                                                                                                                                                             |



Household Number:

| Serial | Question                             | Response             |                      | Code                                                                                                                                                                                                                                                                                                                                                                                                                                                                                                                                                                                                                                                                                                                                                                                                                                                             |
|--------|--------------------------------------|----------------------|----------------------|------------------------------------------------------------------------------------------------------------------------------------------------------------------------------------------------------------------------------------------------------------------------------------------------------------------------------------------------------------------------------------------------------------------------------------------------------------------------------------------------------------------------------------------------------------------------------------------------------------------------------------------------------------------------------------------------------------------------------------------------------------------------------------------------------------------------------------------------------------------|
|        |                                      | Child 1              | Child 2              |                                                                                                                                                                                                                                                                                                                                                                                                                                                                                                                                                                                                                                                                                                                                                                                                                                                                  |
|        |                                      | Child of < 24 months | Child of < 24 months |                                                                                                                                                                                                                                                                                                                                                                                                                                                                                                                                                                                                                                                                                                                                                                                                                                                                  |
| Y4_14  | Where did you get the medicine from? | <input type="text"/> | <input type="text"/> | Govt. Hospital/Upazila Health Complex ..... 1<br>Doctor ..... 2<br>Midwife/nurse..... 3<br>Govt. Health Worker (FWA/HA)..... 4<br>MA/SACMO..... 5<br>BRAC SS..... 6<br>BRAC SK ..... 7<br>BRAC Pushti Kormi (PK)/IYCF Promoter ..... 8<br>Others NGO Worker ..... 9<br>TTBA..... 10<br>TBA ..... 11<br>Village Doctor ..... 12<br>Homeopath Doctor..... 13<br>Kabiraj/Herbal healer ..... 14<br>Spiritual Healer ..... 15<br>Pharmacy ..... 16<br>Husband ..... 17<br>Mother/Mother in law ..... 18<br>Other Family members..... 19<br>Neighbors/ Friends..... 20<br>Private Hospital/ Clinic..... 21<br>Mother and Children Welfare Centre (MCWC) ..... 22<br>Community Clinic..... 23<br>Satellite Clinic/ EPI Center ..... 24<br>Smiling Sun Clinic..... 25<br>Self..... 26<br>Nobody ..... 27<br>Other (specify) ..... 77<br>Do Not Know/ Do Not Remember 88 |

Household Number:

**Module Y5: Nutrition related Prenatal Care during Pregnancy with Youngest Child (Female)**

Instructions: To be asked for all children under the age of 24 months

| Serial no.         | Question                                                                         | Child of < 24 months                          |                                             | Response Code                                             |
|--------------------|----------------------------------------------------------------------------------|-----------------------------------------------|---------------------------------------------|-----------------------------------------------------------|
|                    |                                                                                  | Child 1                                       | Child 2                                     |                                                           |
| Child's Member ID  | Copy the child's Name and ID from module B                                       | Name: _____<br>Mem. ID <input type="text"/>   | Name: _____<br>Mem. ID <input type="text"/> | Name and Member ID                                        |
| Mother's Member ID | Copy the child's mother's Name and ID from module B                              | Name: _____<br>Member ID <input type="text"/> |                                             | Name and Member ID<br>If not member of HH, then record 55 |
| Father's Member ID | Copy the child's father's Name and ID from module B                              | Name: _____<br>Member ID <input type="text"/> |                                             | Name and Member ID<br>If not member of HH, then record 55 |
| Y5_01              | Did you receive any antenatal care (ANC) when you were pregnant with this child? | <input type="text"/>                          | <input type="text"/>                        | Yes ..... 1<br>No ..... 2>>Y5_09                          |

Household Number:

| Serial no. | Question                                                                                                          | Child of < 24 months                                                 |                                                                      | Response Code                                                                                                                                                                                                                                                                                                                                                                                                                                                                                                                                                                                                                                                                                                                                                                                                                                                         |
|------------|-------------------------------------------------------------------------------------------------------------------|----------------------------------------------------------------------|----------------------------------------------------------------------|-----------------------------------------------------------------------------------------------------------------------------------------------------------------------------------------------------------------------------------------------------------------------------------------------------------------------------------------------------------------------------------------------------------------------------------------------------------------------------------------------------------------------------------------------------------------------------------------------------------------------------------------------------------------------------------------------------------------------------------------------------------------------------------------------------------------------------------------------------------------------|
|            |                                                                                                                   | Child 1                                                              | Child 2                                                              |                                                                                                                                                                                                                                                                                                                                                                                                                                                                                                                                                                                                                                                                                                                                                                                                                                                                       |
| Y5_02      | Whom did you see for antenatal care during this pregnancy?<br>(MULTIPLE RESPONSES, PROBE AND WRITE ALL MENTIONED) | <input type="text"/><br><input type="text"/><br><input type="text"/> | <input type="text"/><br><input type="text"/><br><input type="text"/> | Govt. Hospital/Upazila Health Complex ..... 1<br>Doctor..... 2<br>Midwife/nurse ..... 3<br>Govt. Health Worker (FWA/HA) ..... 4<br>MA/SACMO ..... 5<br>BRAC SS ..... 6<br>BRAC SK..... 7<br>BRAC Pushti Kormi (PK)/IYCF Promoter ..... 8<br>Others NGO Worker..... 9<br>TTBA ..... 10<br>TBA..... 11<br>Village Doctor ..... 12<br>Homeopath Doctor ..... 13<br>Kabiraj/Herbal healer ..... 14<br>Spiritual Healer ..... 15<br>Pharmacy ..... 16<br>Husband ..... 17<br>Mother/Mother in law..... 18<br>Other Family members ..... 19<br>Neighbors/ Friends ..... 20<br>Private Hospital/ Clinic ..... 21<br>Mother and Children Welfare Centre (MCWC) ..... 22<br>Community Clinic ..... 23<br>Satellite Clinic/ EPI Center..... 24<br>Smiling Sun Clinic ..... 25<br>Self ..... 26<br>Nobody ..... 27<br>Other (specify)..... 77<br>Do Not Know/ Do Not Remember 88 |
| Y5_03      | How many antenatal care sessions/check-ups did you attend when you were pregnant with this child?                 | <input type="text"/>                                                 | <input type="text"/>                                                 | Never ..... 0<br>If attended, record exact number of sessions                                                                                                                                                                                                                                                                                                                                                                                                                                                                                                                                                                                                                                                                                                                                                                                                         |

Household Number:

| Serial no. | Question                                                                                                                                                                              | Child of < 24 months                                                 |                                                                      | Response Code                                                                                                                                                                                                                                                                                                                                                                                                                                                                                                        |
|------------|---------------------------------------------------------------------------------------------------------------------------------------------------------------------------------------|----------------------------------------------------------------------|----------------------------------------------------------------------|----------------------------------------------------------------------------------------------------------------------------------------------------------------------------------------------------------------------------------------------------------------------------------------------------------------------------------------------------------------------------------------------------------------------------------------------------------------------------------------------------------------------|
|            |                                                                                                                                                                                       | Child 1                                                              | Child 2                                                              |                                                                                                                                                                                                                                                                                                                                                                                                                                                                                                                      |
| Y5_04      | Where all did you attend these sessions? Anywhere else? PROBE for all responses.<br><br>If antenatal sessions attended "0" zero time then write "99=N/A"<br><br>(Multiple Response)   | <input type="text"/><br><input type="text"/><br><input type="text"/> | <input type="text"/><br><input type="text"/><br><input type="text"/> | Government hospital ..... 1<br>Upazila Health Complex ..... 2<br>Private clinic..... 3<br>Pharmacy..... 4<br>MCWC ..... 5<br>Community Clinic ..... 6<br>Satellite clinic/EPI Center..... 7<br>Smiling Sun Clinic ..... 8<br>Union Health and Family Welfare Center ..... 9<br>NGO facility: (specify) ..... 10<br>Doctor's Chamber ..... 11<br>Private doctor (MBBS)..... 12<br>Village doctor ..... 13<br>Home ..... 14<br>Other (specify)..... 77<br>Don't know/cannot recall ..... 88<br>Not applicable ..... 99 |
| Y5_05      | During your pregnancy with this child, how often was your weight measured?                                                                                                            | <input type="text"/>                                                 | <input type="text"/>                                                 | Never ..... 0<br>Once ..... 1<br>2 times ..... 2<br>3 times ..... 3<br>4 times ..... 4<br>5 times ..... 5<br>6 times ..... 6<br>More than 6 times..... 7                                                                                                                                                                                                                                                                                                                                                             |
| Y5_06      | Were you advised on what to eat or how to cook your food during pregnancy?                                                                                                            | <input type="text"/>                                                 | <input type="text"/>                                                 | Yes, on what to eat ..... 1<br>Yes, on how to cook ..... 2<br>Yes, on both eat and cook..... 3<br>No, I was not advised ..... 4 >> Y5_08                                                                                                                                                                                                                                                                                                                                                                             |
| Y5_07      | What advise were you given about eating during pregnancy?                                                                                                                             | <input type="text"/><br><input type="text"/><br><input type="text"/> | <input type="text"/><br><input type="text"/><br><input type="text"/> | Eat more food ..... 1<br>Take more rest ..... 2<br>Take iron-folic acid tablets ..... 3<br>Take calcium tablets ..... 4<br>Other ..... 5                                                                                                                                                                                                                                                                                                                                                                             |
| Y5_08      | How many Tetanus Toxoid (TT) vaccinations did you have during your pregnancy with this child? [A TT vaccination is an injection in your arm to prevent the baby from getting tetanus] | <input type="text"/>                                                 | <input type="text"/>                                                 | None ..... 0<br>One ..... 1<br>Two ..... 2<br>Don't know/cannot remember ..... 8                                                                                                                                                                                                                                                                                                                                                                                                                                     |
| Y5_09      | Did you take iron/IFA tablets/supplements during your pregnancy with this child? SHOW IRON TABLET                                                                                     | <input type="text"/>                                                 | <input type="text"/>                                                 | Yes ..... 1<br>No..... 2 >> Y5_13<br>Don't know/cannot remember ..... 8 >> Y5_13                                                                                                                                                                                                                                                                                                                                                                                                                                     |

Household Number:

| Serial no. | Question                                                                                                   | Child of < 24 months                                                                         |                                                                                              | Response Code                                                                                                                                                                                                                                                                                                                                                                                                                                                                                                       |
|------------|------------------------------------------------------------------------------------------------------------|----------------------------------------------------------------------------------------------|----------------------------------------------------------------------------------------------|---------------------------------------------------------------------------------------------------------------------------------------------------------------------------------------------------------------------------------------------------------------------------------------------------------------------------------------------------------------------------------------------------------------------------------------------------------------------------------------------------------------------|
|            |                                                                                                            | Child 1                                                                                      | Child 2                                                                                      |                                                                                                                                                                                                                                                                                                                                                                                                                                                                                                                     |
| Y5_10      | Where did you get the iron/IFA tablets?<br>(multiple responses)                                            | <input type="text"/><br><input type="text"/><br><input type="text"/><br><input type="text"/> | <input type="text"/><br><input type="text"/><br><input type="text"/><br><input type="text"/> | Government hospital ..... 1<br>Upazila Health Complex ..... 2<br>Private clinic..... 3<br>Pharmacy..... 4<br>MCWC ..... 5<br>Community Clinic ..... 6<br>Satellite clinic/EPI Center..... 7<br>Smiling Sun Clinic ..... 8<br>Union Health and Family Welfare Center ..... 9<br>NGO facility: (specify)..... 10<br>Doctor's Chamber ..... 11<br>Private doctor (MBBS)..... 12<br>Village doctor ..... 13<br>Home ..... 14<br>Other (specify)..... 77<br>Don't know/cannot recall ..... 88<br>Not applicable ..... 99 |
| Y5_11      | From which month of pregnancy did you start taking iron tablets/supplements?                               | <input type="text"/>                                                                         | <input type="text"/>                                                                         | Month                                                                                                                                                                                                                                                                                                                                                                                                                                                                                                               |
| Y5_12      | During your pregnancy for this child, for how many months did you take iron tablets or supplements so far? | <input type="text"/>                                                                         | <input type="text"/>                                                                         | Number of Months iron supplement taken<br>If less than 1 month write 1.<br>Don't know/cannot remember ..... 88                                                                                                                                                                                                                                                                                                                                                                                                      |
| Y5_13      | Did you take any CALCIUM tablets/supplements during your pregnancy with this child? SHOW CALCIUM TABLET    | <input type="text"/>                                                                         | <input type="text"/>                                                                         | Yes ..... 1<br>No..... 2 >> Y5_17<br>Don't know/cannot remember ..... 8 >> Y5_17                                                                                                                                                                                                                                                                                                                                                                                                                                    |
| Y5_14      | Where did you get the calcium tablets?<br>(multiple responses)                                             | <input type="text"/><br><input type="text"/><br><input type="text"/>                         | <input type="text"/><br><input type="text"/><br><input type="text"/>                         | Government hospital ..... 1<br>Upazila Health Complex ..... 2<br>Private clinic..... 3<br>Pharmacy..... 4<br>MCWC ..... 5<br>Community Clinic ..... 6<br>Satellite clinic/EPI Center..... 7<br>Smiling Sun Clinic ..... 8<br>Union Health and Family Welfare Center ..... 9<br>NGO facility: (specify)..... 10<br>Doctor's Chamber ..... 11<br>Private doctor (MBBS)..... 12<br>Village doctor ..... 13<br>Home ..... 14<br>Other (specify)..... 77<br>Don't know/cannot recall ..... 88<br>Not applicable ..... 99 |

Household Number:

| Serial no. | Question                                                                                                                     | Child of < 24 months                                                 |                                                                      | Response Code                                                                                                                                                                                                                                                                                                                                                                                                                                                                                         |
|------------|------------------------------------------------------------------------------------------------------------------------------|----------------------------------------------------------------------|----------------------------------------------------------------------|-------------------------------------------------------------------------------------------------------------------------------------------------------------------------------------------------------------------------------------------------------------------------------------------------------------------------------------------------------------------------------------------------------------------------------------------------------------------------------------------------------|
|            |                                                                                                                              | Child 1                                                              | Child 2                                                              |                                                                                                                                                                                                                                                                                                                                                                                                                                                                                                       |
| Y5_15      | From which month of pregnancy did you start taking calcium tablets/supplements?                                              | <input type="text"/>                                                 | <input type="text"/>                                                 | Month                                                                                                                                                                                                                                                                                                                                                                                                                                                                                                 |
| Y5_16      | During your pregnancy for this child, for how many months did you take calcium tablets or supplements so far                 | <input type="text"/>                                                 | <input type="text"/>                                                 | Number of Months iron supplement taken<br>If less than 1 month write 1.<br>Don't know/cannot remember ..... 88                                                                                                                                                                                                                                                                                                                                                                                        |
| Y5_17      | Were you given a vitamin A capsule after delivery?<br><i>This is usually given soon (within a few weeks) after delivery.</i> | <input type="text"/>                                                 | <input type="text"/>                                                 | Yes ..... 1<br>No.....2<br>Don't know/cannot recall ..... 88                                                                                                                                                                                                                                                                                                                                                                                                                                          |
| Y5_18      | Place of delivery for this child?<br><br>(in case of govt. or private facility specify where it was)                         | <input type="text"/>                                                 | <input type="text"/>                                                 | Government hospital ..... 1<br>Upazila Health Complex .....2<br>Private clinic.....3<br>Pharmacy.....4<br>MCWC .....5<br>Community Clinic .....6<br>Satellite clinic/EPI Center .....7<br>Smiling Sun Clinic .....8<br>Union Health and Family Welfare Center .....9<br>NGO facility: (specify) .....10<br>Doctor's Chamber .....11<br>Private doctor (MBBS).....12<br>Village doctor.....13<br>Home .....14<br>Other (specify).....77<br>Don't know/cannot recall .....88<br>Not applicable ..... 99 |
| Y5_19      | Geographic place of delivery                                                                                                 | <input type="text"/>                                                 | <input type="text"/>                                                 | Locally (home, facility) ..... 1<br>In mother's natal/family area .....2<br>Others (specify) ..... 3                                                                                                                                                                                                                                                                                                                                                                                                  |
| Y5_20      | Who helped with the delivery of this child?                                                                                  | <input type="text"/><br><input type="text"/><br><input type="text"/> | <input type="text"/><br><input type="text"/><br><input type="text"/> | Doctor/nurse/ midwife..... 1<br>Govt. Health Worker (FWA/HA) .....2<br>Trained Birth Attendant (TTBA) .....3<br>Traditional Birth Attendant (TBA) .....4<br>Village doctor.....5<br>NGO worker .....6<br>Relative(s) .....7<br>Neighbors/ Friends .....8<br>Others (specify) ..... 9                                                                                                                                                                                                                  |
| Y5_21      | How soon was the baby weighed after birth?                                                                                   | <input type="text"/>                                                 | <input type="text"/>                                                 | Within 24 hours..... 1<br>Between 1-3 days .....2<br>Between 4 days and 1 week.....3<br>In the second week. ....4<br>After 2 weeks .....5<br>Weight not taken ..... 6 >> NEXT MODULE                                                                                                                                                                                                                                                                                                                  |

Household Number:

| Serial no. | Question                                                  | Child of < 24 months |                      | Response Code                                                                                                                                                                                                                                                                                                                                                                                                                                                                                                                                                                                                                                                                                                                                                                                                                                  |
|------------|-----------------------------------------------------------|----------------------|----------------------|------------------------------------------------------------------------------------------------------------------------------------------------------------------------------------------------------------------------------------------------------------------------------------------------------------------------------------------------------------------------------------------------------------------------------------------------------------------------------------------------------------------------------------------------------------------------------------------------------------------------------------------------------------------------------------------------------------------------------------------------------------------------------------------------------------------------------------------------|
|            |                                                           | Child 1              | Child 2              |                                                                                                                                                                                                                                                                                                                                                                                                                                                                                                                                                                                                                                                                                                                                                                                                                                                |
| Y5_22      | Who weighed the baby?                                     | <input type="text"/> | <input type="text"/> | Govt. Hospital/Upazila Health Complex .....1<br>Doctor.....2<br>Midwife/nurse .....3<br>Govt. Health Worker (FWA/HA) .....4<br>MA/SACMO .....5<br>BRAC SS .....6<br>BRAC SK.....7<br>BRAC Pushti Kormi (PK)/IYCF Promoter .....8<br>Others NGO Worker.....9<br>TTBA .....10<br>TBA.....11<br>Village Doctor .....12<br>Homeopath Doctor .....13<br>Kabiraj/Herbal healer .....14<br>Spiritual Healer .....15<br>Pharmacy .....16<br>Husband .....17<br>Mother/Mother in law.....18<br>Other Family members .....19<br>Neighbors/ Friends .....20<br>Private Hospital/ Clinic .....21<br>Mother and Children Welfare Centre (MCWC) .....22<br>Community Clinic .....23<br>Satellite Clinic/ EPI Center.....24<br>Smiling Sun Clinic .....25<br>Self .....26<br>Nobody .....27<br>Other (specify).....77<br>Do Not Know/ Do Not Remember .....88 |
| Y5_23      | What was the weight of the baby (check card if possible)? | <input type="text"/> | <input type="text"/> | Weight in kg<br>Do Not Know/ Do Not Remember .....88                                                                                                                                                                                                                                                                                                                                                                                                                                                                                                                                                                                                                                                                                                                                                                                           |

Household Number:

**Module Y7: NNP Services Usage by Children under 2 years of age (Female)**

*To be asked for all children under the age of 24 months*

| Serial no.         | Question                                                        | Child of < 24 months                                                    |                                                                         | Response Code                                                                                                                                                                                                                                                                                                                                                                                                                                                                                                      |
|--------------------|-----------------------------------------------------------------|-------------------------------------------------------------------------|-------------------------------------------------------------------------|--------------------------------------------------------------------------------------------------------------------------------------------------------------------------------------------------------------------------------------------------------------------------------------------------------------------------------------------------------------------------------------------------------------------------------------------------------------------------------------------------------------------|
|                    |                                                                 | Child – 1                                                               | Child – 2                                                               |                                                                                                                                                                                                                                                                                                                                                                                                                                                                                                                    |
| Child's Member ID  | Copy the child's Name and ID from module B                      | Name: _____<br>Mem. ID <input type="text"/>                             | Name: _____<br>Mem. ID <input type="text"/>                             | Name and Member ID                                                                                                                                                                                                                                                                                                                                                                                                                                                                                                 |
| Mother's Member ID | Copy the child's mother's Name and ID from module B             | Name: _____<br>Member ID <input type="text"/>                           |                                                                         | Name and Member ID<br>If not member of HH, then record 55                                                                                                                                                                                                                                                                                                                                                                                                                                                          |
| Father's Member ID | Copy the child's father's Name and ID from module B             | Name: _____<br>Member ID <input type="text"/>                           |                                                                         | Name and Member ID<br>If not member of HH, then record 55                                                                                                                                                                                                                                                                                                                                                                                                                                                          |
| Y7_ 01             | Does your child [NAME] have a growth card?                      | weight in kg <input type="text"/><br>age in months <input type="text"/> | weight in kg <input type="text"/><br>age in months <input type="text"/> | Yes (if so check card and note weight and age in months at which last growth monitoring was done)<br>have card but weight and age not written.....88<br>No ..... 99                                                                                                                                                                                                                                                                                                                                                |
| Y7_ 02             | Has NAME's weight ever been taken at a clinic or anywhere else? | <input type="text"/>                                                    | <input type="text"/>                                                    | Yes .....1<br>No ..... 2>> Y7_ 04                                                                                                                                                                                                                                                                                                                                                                                                                                                                                  |
| Y7_ 03             | Where was NAME's weight taken?                                  | <input type="text"/>                                                    | <input type="text"/>                                                    | Government hospital..... 1<br>Upazila Health Complex..... 2<br>Private clinic ..... 3<br>Pharmacy ..... 4<br>MCWC ..... 5<br>Community Clinic ..... 6<br>Satellite clinic/EPI Center..... 7<br>Smiling Sun Clinic..... 8<br>Union Health and Family Welfare Center .....9<br>NGO facility: (specify) ..... 10<br>Doctor's Chamber ..... 11<br>Private doctor (MBBS) ..... 12<br>Village doctor ..... 13<br>Home ..... 14<br>Other (specify) ..... 77<br>Don't know/cannot recall..... 88<br>Not applicable..... 99 |



Household Number:

| Serial no. | Question                                                                                                                                     | Child of < 24 months |                      | Response Code                                                                                                                                                                                                                                                                                                                                                                                                                                                                                                |
|------------|----------------------------------------------------------------------------------------------------------------------------------------------|----------------------|----------------------|--------------------------------------------------------------------------------------------------------------------------------------------------------------------------------------------------------------------------------------------------------------------------------------------------------------------------------------------------------------------------------------------------------------------------------------------------------------------------------------------------------------|
|            |                                                                                                                                              | Child – 1            | Child – 2            |                                                                                                                                                                                                                                                                                                                                                                                                                                                                                                              |
| Y7_ 04     | Has NAME's height ever been taken at a clinic or anywhere else?                                                                              | <input type="text"/> | <input type="text"/> | Yes ..... 1<br>No ..... 2>> Y7_ 06                                                                                                                                                                                                                                                                                                                                                                                                                                                                           |
| Y7_ 05     | Where was NAME's height taken?                                                                                                               | <input type="text"/> | <input type="text"/> | Government hospital..... 1<br>Upazila Health Complex..... 2<br>Private clinic ..... 3<br>Pharmacy ..... 4<br>MCWC ..... 5<br>Community Clinic ..... 6<br>Satellite clinic/EPI Center..... 7<br>Smiling Sun Clinic..... 8<br>Union Health and Family Welfare Center9<br>NGO facility: (specify) ..... 10<br>Doctor's Chamber ..... 11<br>Private doctor (MBBS) ..... 12<br>Village doctor ..... 13<br>Home ..... 14<br>Other (specify) ..... 77<br>Don't know/cannot recall..... 88<br>Not applicable..... 99 |
| Y7_ 06     | Has NAME's arm circumference ever been taken at a clinic or anywhere else? Arm circumference is where the upper arm is measured using a tape | <input type="text"/> | <input type="text"/> | Yes ..... 1<br>No ..... 2>> NEXT MODULE                                                                                                                                                                                                                                                                                                                                                                                                                                                                      |

Household Number:

| Serial no. | Question                                                                               | Child of < 24 months |                      | Response Code                                                                                                                                                                                                                                                                                                                                                                                                                                                                                                         |
|------------|----------------------------------------------------------------------------------------|----------------------|----------------------|-----------------------------------------------------------------------------------------------------------------------------------------------------------------------------------------------------------------------------------------------------------------------------------------------------------------------------------------------------------------------------------------------------------------------------------------------------------------------------------------------------------------------|
|            |                                                                                        | Child – 1            | Child – 2            |                                                                                                                                                                                                                                                                                                                                                                                                                                                                                                                       |
| Y7_07      | Where was NAME's arm circumference taken?<br>[if never attended put not applicable=99] | <input type="text"/> | <input type="text"/> | Government hospital..... 1<br>Upazila Health Complex..... 2<br>Private clinic ..... 3<br>Pharmacy ..... 4<br>MCWC ..... 5<br>Community Clinic ..... 6<br>Satellite clinic/EPI Center..... 7<br>Smiling Sun Clinic..... 8<br>Union Health and Family<br>Welfare Center..... 9<br>NGO facility: (specify) ..... 10<br>Doctor's Chamber ..... 11<br>Private doctor (MBBS) ..... 12<br>Village doctor ..... 13<br>Home ..... 14<br>Other (specify) ..... 77<br>Don't know/cannot recall..... 88<br>Not applicable..... 99 |
| Y7_08      | What was done after NAME's arm circumference was measured?                             | <input type="text"/> | <input type="text"/> | Nothing ..... 1<br>I was given advise about food..... 2<br>Child was given special foods to take home ... 3<br>Child was referred to treatment center ..... 4<br>OTHER (specify)..... 7                                                                                                                                                                                                                                                                                                                               |

Household Number:

**Module Y8: Exposure to Nutrition Information from Health Workers and Media (Female)**

| Question Number | Questions                                                                                                                              | Response                                                                                                                                                             | Response Code                                                                                                                                                                                                                                                                                                                                                                                                                                                                                                                                                                                                                       |
|-----------------|----------------------------------------------------------------------------------------------------------------------------------------|----------------------------------------------------------------------------------------------------------------------------------------------------------------------|-------------------------------------------------------------------------------------------------------------------------------------------------------------------------------------------------------------------------------------------------------------------------------------------------------------------------------------------------------------------------------------------------------------------------------------------------------------------------------------------------------------------------------------------------------------------------------------------------------------------------------------|
| Y8_01           | Have you been visited at home by <u>any health worker in the last SIX months?</u>                                                      | <input type="checkbox"/>                                                                                                                                             | Yes.....1<br>No.....2>> Y8_06<br>Don't know.....88>> Y8_06                                                                                                                                                                                                                                                                                                                                                                                                                                                                                                                                                                          |
| Y8_02           | In the last <u>SIX months</u> , did any health worker from anywhere or any organization visit you at home?                             | <input type="checkbox"/>                                                                                                                                             | Government Health Worker (FWA/HA) .....1<br>SMC/Other Health Worker.....2<br>BRAC Worker (SK/SS/PK etc.).....3<br>Other NGO worker .....4<br>Other (Specify) .....5                                                                                                                                                                                                                                                                                                                                                                                                                                                                 |
| Y8_03           | How many times in the last SIX months were you visited at home by a health worker?                                                     | <input type="checkbox"/>                                                                                                                                             | Number of times<br>Don't remember .....88                                                                                                                                                                                                                                                                                                                                                                                                                                                                                                                                                                                           |
| Y8_04           | During the last visit, did you receive any advice from the health worker on feeding your child?                                        | <input type="checkbox"/>                                                                                                                                             | Yes.....1<br>No.....2                                                                                                                                                                                                                                                                                                                                                                                                                                                                                                                                                                                                               |
| Y8_01a          | Have you been visited at home by <u>any health worker in the last THREE months?</u>                                                    | <input type="checkbox"/>                                                                                                                                             | Yes.....1<br>No.....2>> Y8_06<br>Don't know.....8>> Y8_06                                                                                                                                                                                                                                                                                                                                                                                                                                                                                                                                                                           |
| Y8_02a          | In the last <u>THREE months</u> , did any health worker from anywhere or any organization visit you at home?                           | <input type="checkbox"/>                                                                                                                                             | Government Health Worker (FWA/HA) .....1<br>SMC/Other Health Worker.....2<br>BRAC Worker (SK/SS/PK etc.).....3<br>Other NGO worker .....4<br>Other (Specify) .....5                                                                                                                                                                                                                                                                                                                                                                                                                                                                 |
| Y8_03a          | How many times in the last THREE months were you visited at home by a health worker?                                                   | <input type="checkbox"/>                                                                                                                                             | Number of times<br>Don't remember .....88                                                                                                                                                                                                                                                                                                                                                                                                                                                                                                                                                                                           |
| Y8_04a          | During the last visit (within the last <u>THREE months</u> ), did you receive any advice from the health worker on feeding your child? | <input type="checkbox"/>                                                                                                                                             | Yes.....1<br>No.....2>> Y8_06                                                                                                                                                                                                                                                                                                                                                                                                                                                                                                                                                                                                       |
| Y8_05           | What advice did you receive from the health worker on feeding your child?                                                              | <input type="checkbox"/><br><input type="checkbox"/><br><input type="checkbox"/><br><input type="checkbox"/><br><input type="checkbox"/><br><input type="checkbox"/> | Putting baby to breast immediately after birth.....1<br>Giving only colostrum .....2<br>No pre or post lacteals (honey/mustard oil/glucose water) .....3<br>Feed only breast milk up to six Months.....4<br>Positioning.....5<br>Attachment .....6<br>Feeding mashed family food after 6 months .....7<br>Feeding animal source foods .....8<br>Cooking/adding with oil .....9<br>Adding Sprinkles .....10<br>Washing hands with water and soap before prep/feeding child .....11<br>Feeding during illness/extra after illness .....12<br>Other (specify).....13<br>Respondent did not mention any of the above on her own .....99 |

Household Number:

|              |                                                                                                        |                                                                                                                      |                                                                                                                                                                                                                                                                                                                                                                                                                                                            |
|--------------|--------------------------------------------------------------------------------------------------------|----------------------------------------------------------------------------------------------------------------------|------------------------------------------------------------------------------------------------------------------------------------------------------------------------------------------------------------------------------------------------------------------------------------------------------------------------------------------------------------------------------------------------------------------------------------------------------------|
| <b>Y8_06</b> | Have you ever attended any group meetings/discussions where health or nutrition issues were discussed? | <input type="text"/>                                                                                                 | Yes.....1<br>No.....2>> Y8_11                                                                                                                                                                                                                                                                                                                                                                                                                              |
| <b>Y8_07</b> | Last time you attended a group discussion about health/nutrition, what was discussed?                  | <input type="text"/><br><input type="text"/><br><input type="text"/><br><input type="text"/><br><input type="text"/> | Family planning.....1<br>Water and sanitation.....2<br>Immunization.....3<br>Maternal nutrition.....4<br>TB.....5<br>Breastfeeding.....6<br>Complementary feeding.....7<br>Sprinkles.....8<br>Washing hands with water and soap before prep/ feeding child.....9<br>Encouraging child to eat enough.....10<br>Feeding during illness/extra after illness.....11<br>Other (specify).....12<br>Respondent did not mention any of the above on her own.....99 |

**Module Y6a: Access to Community Clinics and Use of Community Clinic (Female)**

| Question Number | Question                                                                                                 | Response                                                             |                                                                      |                                                                      | Response Code                                                                                                                                                                                                                                                                                                       |
|-----------------|----------------------------------------------------------------------------------------------------------|----------------------------------------------------------------------|----------------------------------------------------------------------|----------------------------------------------------------------------|---------------------------------------------------------------------------------------------------------------------------------------------------------------------------------------------------------------------------------------------------------------------------------------------------------------------|
|                 |                                                                                                          | a                                                                    | b                                                                    | c                                                                    |                                                                                                                                                                                                                                                                                                                     |
| <b>Y6a_01</b>   | Have you heard about the Community Clinic?                                                               | <input type="text"/>                                                 |                                                                      |                                                                      | Yes..... 1<br>No..... 2 >> Next Module                                                                                                                                                                                                                                                                              |
| <b>Y6a_02</b>   | How long does it take you to walk to the Community Clinic in your area?                                  | <input type="text"/>                                                 |                                                                      |                                                                      | MINUTES<br>Not walkable..... 999                                                                                                                                                                                                                                                                                    |
| <b>Y6a_03</b>   | Is there anyone in this household who has used the Community Clinic and obtains/obtained services there? | <input type="text"/>                                                 |                                                                      |                                                                      | Yes..... 1<br>No..... 2 >> Next Module                                                                                                                                                                                                                                                                              |
| <b>Y6a_04</b>   | Who in your household has used the Community Clinic?                                                     | <input type="text"/>                                                 | <input type="text"/>                                                 | <input type="text"/>                                                 | Put member ID from roster                                                                                                                                                                                                                                                                                           |
| <b>Y6a_05</b>   | What types of services at Community Clinic were used for this person?<br>(multiple responses allowed)    | <input type="text"/><br><input type="text"/><br><input type="text"/> | <input type="text"/><br><input type="text"/><br><input type="text"/> | <input type="text"/><br><input type="text"/><br><input type="text"/> | Sick child care ..... 1<br>Antenatal care ..... 2<br>Delivery care..... 3<br>Postnatal care..... 4<br>Family planning services ..... 5<br>Received IFA tablets during pregnancy... 6<br>Received vitamin A for children..... 7<br>Child was weighed..... 9<br>Sick care (for adult) ..... 10<br>Vaccination..... 11 |

Module End Time: Hour   Minute

Household Number:

**Module Z: Women's Status (Female)**

Module start time: Hour   Minu

Respondent ID:  Consent :  Yes...1  
No....2

| Sl no | Question                                          | Response             | Response Code                                                                                                                                                                 |
|-------|---------------------------------------------------|----------------------|-------------------------------------------------------------------------------------------------------------------------------------------------------------------------------|
| Z_1   | Member ID of Primary Female Household Member      | <input type="text"/> | Member ID                                                                                                                                                                     |
| Z_2   | Marital Status of Primary Female Household Member | <input type="text"/> | Never Married ..... 1<br>Married, lives with husband..... 2<br>Married, does not live with husband ..... 3<br>Widow ..... 4<br>Divorced ..... 5<br>Separated/Deserted ..... 6 |

**Module Z1: Work Earnings and Expenses (Female)**

| Question Number | Question                                                                                                                                                                                                                                              | Response | Response Code                                                                                                                                                                                                                                                                                                                                                                    |
|-----------------|-------------------------------------------------------------------------------------------------------------------------------------------------------------------------------------------------------------------------------------------------------|----------|----------------------------------------------------------------------------------------------------------------------------------------------------------------------------------------------------------------------------------------------------------------------------------------------------------------------------------------------------------------------------------|
| Z1_01           | Are you now doing any work or business that brings in cash, additional food, or allows you to accumulate assets for your household? ( <i>Note: if the woman says no, check she does not engage in agriculture, petty trade, money lending, etc.</i> ) |          | Yes ..... 1 >>Z1_05<br>No..... 2                                                                                                                                                                                                                                                                                                                                                 |
| Z1_02           | If not, why not?                                                                                                                                                                                                                                      |          | Husband / in-laws won't allow ..... 1<br>Society doesn't like it ..... 2<br>Take care of children/household work ..... 3 >>Z1_12<br>I don't want to ..... 4 >>Z1_12<br>I don't need to..... 5 >>Z1_12<br>Am unable to work ..... 6 >>Z1_12<br>Lack of demand for the work that I have skill to do..... 7 >>Z1_12<br>Other (specify)..... 8 >>Z1_12<br>Don't know..... 88 >>Z1_12 |
| Z1_03           | Why won't your husband or your in-laws, or society let you work?                                                                                                                                                                                      |          | Believes women should not work to earn income ..... 1<br>Household has enough income ..... 2<br>Wants me to look after household work..... 3<br>Doesn't want me to mingle with other men ..... 4<br>Other (specify)..... 5<br>Don't know/ Don't remember..... 88                                                                                                                 |
| Z1_04           | Would your husband or in-laws allow you to engage in a business or earn additional money from working inside your home?                                                                                                                               |          | Yes ..... 1<br>No..... 2 >>Z1_12                                                                                                                                                                                                                                                                                                                                                 |
| Z1_05           | Where do you work to earn income?                                                                                                                                                                                                                     |          | Inside the home..... 1<br>Outside ..... 2<br>Both..... 3                                                                                                                                                                                                                                                                                                                         |

Household Number:

| Question Number | Question                                                                                            | Response | Response Code                                                                                                                                                                                                                                                                                  |
|-----------------|-----------------------------------------------------------------------------------------------------|----------|------------------------------------------------------------------------------------------------------------------------------------------------------------------------------------------------------------------------------------------------------------------------------------------------|
| Z1_06           | Whose decision was it to work to earn income?                                                       |          | Yourself ..... 1<br>Your husband ..... 2<br>Self and husband..... 3<br>Someone else (specify) ..... 4                                                                                                                                                                                          |
| Z1_07           | At first did your husband or other household member want to prevent you from working to earn money? |          | Yes ..... 1<br>No..... 2>>Z1_09                                                                                                                                                                                                                                                                |
| Z1_08           | If yes, why so?                                                                                     |          | Believes women should not work ..... 1>>Z1_10<br>Household has enough income ..... 2>> Z1_10<br>Wants me to look after household work..... 3>> Z1_10<br>Doesn't want me to mingle with other men .... 4>> Z1_10<br>Other (specify)..... 5>> Z1_10<br>Don't know/ Don't remember..... 6 >>Z1_10 |
| Z1_09           | If no, why not?                                                                                     |          | Husband/other household members unable to work..... 1<br>Money/food was short ..... 2<br>Other (specify) ..... 3                                                                                                                                                                               |
| Z1_10           | What do you do with the money you earn?                                                             |          | Give it all to my husband / other family member ..... 1<br>Give some to husband / other member ..... 2<br>Keep all ..... 3                                                                                                                                                                     |
| Z1_11           | Who usually decides how to spend the money you earn?                                                |          | Yourself ..... 1<br>Your husband ..... 2<br>Self and husband..... 3<br>Someone else (specify) ..... 4                                                                                                                                                                                          |
| Z1_12           | Have you ever taken any loans from an NGO?                                                          |          | Yes ..... 1<br>No ..... 2>>Z1_15                                                                                                                                                                                                                                                               |
| Z1_13           | Whose decision was it to take the loan from the NGO?                                                |          | Yourself ..... 1<br>Your husband ..... 2<br>Self and husband..... 3<br>Someone else (specify) 4                                                                                                                                                                                                |
| Z1_14           | Who usually decides how to spend the money from the loan?                                           |          | Yourself ..... 1<br>Your husband ..... 2<br>Self and husband..... 3<br>Someone else (specify) ..... 4                                                                                                                                                                                          |
| Z1_15           | <i>Who decides how to spend money on the following items?</i>                                       |          |                                                                                                                                                                                                                                                                                                |

Household Number:

| Question Number | Question                                                              | Response | Response Code                                                                                                                 |
|-----------------|-----------------------------------------------------------------------|----------|-------------------------------------------------------------------------------------------------------------------------------|
| <b>Z1_15a</b>   | Food                                                                  |          | Yourself..... 1<br>Your husband ..... 2<br>Self and husband..... 3<br>Someone else (specify) ..... 4<br>Not applicable..... 9 |
| <b>Z1_15b</b>   | Housing                                                               |          |                                                                                                                               |
| <b>Z1_15c</b>   | Health Care                                                           |          |                                                                                                                               |
| <b>Z1_15d</b>   | Education                                                             |          |                                                                                                                               |
| <b>Z1_15e</b>   | Clothing                                                              |          |                                                                                                                               |
| <b>Z1_16</b>    | <i>Do you yourself control the money needed to buy the following?</i> |          |                                                                                                                               |
| <b>Z1_16a</b>   | Food from the market                                                  |          | Yes ..... 1<br>No..... 2                                                                                                      |
| <b>Z1_16b</b>   | Clothes for yourself                                                  |          |                                                                                                                               |
| <b>Z1_16c</b>   | Medicine for yourself                                                 |          |                                                                                                                               |
| <b>Z1_16d</b>   | Toiletries/cosmetics for yourself                                     |          |                                                                                                                               |

Household Number:

**Module Z2: Freedom of Mobility (Female)**

| Place code | Places                                              | Who decides whether you can go by yourself to the following places?<br>Yourself. .... 1<br>Your husband ..... 2<br>Self and husband ..... 3<br>Others (specify) ..... 4<br>Not applicable ..... 5 | If your husband or other household member objects, in what circumstances would they allow you to go?<br>If I have company (relatives, children) ..... 1<br>If I can arrange my own expenses ..... 2<br>If I follow purdah / dress acceptably ..... 3<br>Other (specify) ..... 4<br>Not applicable/would not object if I go alone ..... 5 |
|------------|-----------------------------------------------------|---------------------------------------------------------------------------------------------------------------------------------------------------------------------------------------------------|------------------------------------------------------------------------------------------------------------------------------------------------------------------------------------------------------------------------------------------------------------------------------------------------------------------------------------------|
|            |                                                     | Code ↑                                                                                                                                                                                            | Code ↑                                                                                                                                                                                                                                                                                                                                   |
| Z2_01      | Outside the community to visit friends or relatives |                                                                                                                                                                                                   |                                                                                                                                                                                                                                                                                                                                          |
| Z2_02      | Haat/Bazaar                                         |                                                                                                                                                                                                   |                                                                                                                                                                                                                                                                                                                                          |
| Z2_03      | Hospital/Clinic/Doctor                              |                                                                                                                                                                                                   |                                                                                                                                                                                                                                                                                                                                          |
| Z2_04      | Cinema/Fair/Theatre                                 |                                                                                                                                                                                                   |                                                                                                                                                                                                                                                                                                                                          |
| Z2_05      | Training for NGO/Programs                           |                                                                                                                                                                                                   |                                                                                                                                                                                                                                                                                                                                          |

Module End Time: Hour   Minute



Household Number:

**Module Z3: Reproductive Decisions (Female)**

To be asked to all the married females between the ages of 10 and 49 years

Module start time: Hour   Minu

Respondent ID:  Consent :  Yes...1  
No....2

| Question Number    | Question                                                                          | Response |     |     |     |     | Response Code                                                                                                                                                                                                                                                                                                                                           |
|--------------------|-----------------------------------------------------------------------------------|----------|-----|-----|-----|-----|---------------------------------------------------------------------------------------------------------------------------------------------------------------------------------------------------------------------------------------------------------------------------------------------------------------------------------------------------------|
|                    |                                                                                   | MID      | MID | MID | MID | MID |                                                                                                                                                                                                                                                                                                                                                         |
| Respondent Consent | Do you agree to answer the following question about your reproductive decisions?  |          |     |     |     |     | Yes ..... 1<br>No.....2>>Next Module                                                                                                                                                                                                                                                                                                                    |
| Z3_01              | Have you ever used birth control (methods to delay or avoid pregnancy?)           |          |     |     |     |     | Yes ..... 1<br>No..... 2>>Z3_03                                                                                                                                                                                                                                                                                                                         |
| Z3_01a             | Which method did you use?                                                         |          |     |     |     |     | Birth control pill ..... 1<br>IUD (e.g. Coper T) ..... 2<br>Implant/Norplant ..... 3<br>Injection/Somaject (to delay pregnancy by a few months) ..... 4<br>Injection/DepoProvera(to delay pregnancy by a few months) ..... 5<br>Ligation/Tubectomy ..... 6<br>Safe days/ Temperature Control ..... 7<br>Others ..... 8<br>Do not want to respond.....88 |
| Z3_02              | Who made this decision?<br>(After filling this question's response skip to Z3_04) |          |     |     |     |     | Yourself ..... 1 >> Z3_04<br>Your husband ..... 2>> Z3_04<br>Self and husband.....3>> Z3_04<br>Someone else (specify).....4>> Z3_04                                                                                                                                                                                                                     |
| Z3_03              | Why have you not used birth control?                                              |          |     |     |     |     | Husband didn't allow..... 1<br>Makes me feel weak / ill..... 2<br>Didn't feel the need to ..... 3<br>Other (specify) ..... 4                                                                                                                                                                                                                            |
| Z3_04              | Has your husband ever used any birth control method?                              |          |     |     |     |     | Yes ..... 1<br>No ..... 2 >> Z3_05<br>Not applicable.....3 >> Z3_05                                                                                                                                                                                                                                                                                     |
| Z3_04a             | Which method did your husband use?                                                |          |     |     |     |     | Condom ..... 1<br>Vasectomy ..... 2<br>Others(specify) ..... 3                                                                                                                                                                                                                                                                                          |
| Z3_05              | If Z3_01=2 and Z3_04=2 or 3, please confirm if the man was sterilized?            |          |     |     |     |     | Yes ..... 1<br>No..... 2                                                                                                                                                                                                                                                                                                                                |
| Z3_06              | If Z3_01=2 and Z3_04=2 or 3, please confirm if the woman was sterilized?          |          |     |     |     |     | Yes ..... 1<br>No..... 2                                                                                                                                                                                                                                                                                                                                |

Household Number:

**Module Z4: Domestic Violence, Abuse and Threats (Female)**

*To be asked to all the married females aged between 10 and 49 years*

| Question Number           | Question                                                               | Response    |             |             |             |             | Response Code                                                                                                                                                          |
|---------------------------|------------------------------------------------------------------------|-------------|-------------|-------------|-------------|-------------|------------------------------------------------------------------------------------------------------------------------------------------------------------------------|
|                           |                                                                        | Member 1    | Member 2    | Member 3    | Member 4    | Member 5    |                                                                                                                                                                        |
|                           |                                                                        | Member Name | Member Name | Member Name | Member Name | Member Name |                                                                                                                                                                        |
|                           |                                                                        | MID         | MID         | MID         | MID         | MID         |                                                                                                                                                                        |
| <b>Respondent Consent</b> | Do you agree to answer the following question about domestic violence? |             |             |             |             |             | Yes..... 1<br>No..... 2>>Next Module                                                                                                                                   |
| <b>Z4_01</b>              | Has any of the following happened to you in the past year?             |             |             |             |             |             |                                                                                                                                                                        |
| <b>Z4_01a</b>             | Your husband threatened you with divorce?                              |             |             |             |             |             | Yes, often..... 1<br>Yes, sometimes..... 2<br>Has threatened and has divorced/remarried ..... 3<br>No..... 4<br>Not applicable..... 9<br>Do not want to respond.....88 |
| <b>Z4_01b</b>             | Your husband threatened you with taking another wife?                  |             |             |             |             |             |                                                                                                                                                                        |
| <b>Z4_01c1</b>            | Your husband verbally abused you?                                      |             |             |             |             |             | Yes, often..... 1<br>Yes, sometimes..... 2<br>Has threatened and has divorced/remarried ..... 3<br>No..... 4<br>Not applicable..... 9<br>Do not want to respond.....88 |
| <b>Z4_01c2</b>            | Any other adult male of your household verbally abused you?            |             |             |             |             |             |                                                                                                                                                                        |
| <b>Z4_01c3</b>            | Any adult female of your household verbally abused you?                |             |             |             |             |             |                                                                                                                                                                        |
| <b>Z4_01d1</b>            | Your husband physically abused you?                                    |             |             |             |             |             | Yes, often..... 1<br>Yes, sometimes..... 2<br>Has threatened and has divorced/remarried ..... 3<br>No..... 4<br>Not applicable..... 9<br>Do not want to respond.....88 |

Household Number:

| Question Number | Question                                                                                  | Response |  |  |  |  | Response Code                                                                                                                                                            |
|-----------------|-------------------------------------------------------------------------------------------|----------|--|--|--|--|--------------------------------------------------------------------------------------------------------------------------------------------------------------------------|
| <b>Z4_01e1</b>  | If Z4_01d1 if 1 or 2, injuries from physical assault?<br><br>(multiple responses allowed) |          |  |  |  |  | Cuts=1<br>Bruises=2<br>Ache=3<br>Eye injury=4<br>Sprain=5<br>Dislocation=6<br>Burn=7<br>Deep wound=8<br>Broken bones=9<br>Broken teeth=10<br>Any other serious injury=11 |
| <b>Z4_01d2</b>  | Any other adult male of your household physically abused you?                             |          |  |  |  |  | Yes, often..... 1<br>Yes, sometimes..... 2<br>Has threatened and divorced/remarried..... 3<br>No..... 4<br>Not applicable..... 9<br>Do not want to respond.....88        |
| <b>Z4_01e2</b>  | If Z4_01d2 if 1 or 2, injuries from physical assault?<br><br>(multiple responses allowed) |          |  |  |  |  | Cuts=1<br>Bruises=2<br>Ache=3<br>Eye injury=4<br>Sprain=5<br>Dislocation=6<br>Burn=7<br>Deep wound=8<br>Broken bones=9<br>Broken teeth=10<br>Any other serious injury=11 |
| <b>Z4_01d3</b>  | Any adult female of your household physically abused you?                                 |          |  |  |  |  | Yes, often..... 1<br>Yes, sometimes..... 2<br>Has threatened and divorced/remarried..... 3<br>No..... 4<br>Not applicable..... 9<br>Do not want to respond.....88        |
| <b>Z4_01e3</b>  | If Z4_01d3 if 1 or 2, injuries from physical assault?                                     |          |  |  |  |  | Cuts=1<br>Bruises=2<br>Ache=3<br>Eye injury=4<br>Sprain=5<br>Dislocation=6<br>Burn=7<br>Deep wound=8<br>Broken bones=9<br>Broken teeth=10<br>Any other serious injury=11 |
| <b>Z4_05</b>    | Were you ever threatened to leave the house?                                              |          |  |  |  |  | Yes..... 1<br>No..... 2                                                                                                                                                  |

Household Number:

| Question Number                                                                       | Question                                                              | Response |  |  |  |  | Response Code                                                                                                                                                                                                                                                                                                    |
|---------------------------------------------------------------------------------------|-----------------------------------------------------------------------|----------|--|--|--|--|------------------------------------------------------------------------------------------------------------------------------------------------------------------------------------------------------------------------------------------------------------------------------------------------------------------|
| Z4_06                                                                                 | Were you ever forcefully sent out of the house?                       |          |  |  |  |  | Yes..... 1<br>No..... 2                                                                                                                                                                                                                                                                                          |
| Z4_07                                                                                 | If yes, who brought you back?                                         |          |  |  |  |  | Husband....1<br>Other adult male member of hh....2<br>Other adult female hh member....3<br>Came back myself.....4<br>Did not come back.....5<br>Do not want to respond=88                                                                                                                                        |
| Z4_08                                                                                 | If the answer to Z4_07 is 4, why did you come back yourself?          |          |  |  |  |  | He was angry and didn't mean it ..... 1<br>My husband and I came to an agreement ..... 2<br>I could not support myself financially..... 3<br>My parents could not support me financially ..... 4<br>I came back for my children ..... 5<br>Because of social pressure ..6<br>Do not want to respond=88           |
| <i>If response to question Z4_01a to Z4_01d3 is either 4 or 9, then skip to Z4_09</i> |                                                                       |          |  |  |  |  |                                                                                                                                                                                                                                                                                                                  |
| Z4_02                                                                                 | If any answer to Z4_1a to Z4_1d3 is 1, 2 or 3, did you want to leave? |          |  |  |  |  | Yes..... 1<br>No.....2 >>Z4_09                                                                                                                                                                                                                                                                                   |
| Z4_03                                                                                 | Did you leave?                                                        |          |  |  |  |  | Yes, permanently ..... 1 >>Z4_09<br>Yes, but I came back..... 2<br>No.....3                                                                                                                                                                                                                                      |
| Z4_04                                                                                 | If you did not leave permanently, why not?                            |          |  |  |  |  | He was angry and didn't mean it ..... 1<br>My husband and I came to an agreement ..... 2<br>I could not support myself financially..... 3<br>My parents could not support me financially ..... 4<br>I came back for my children ..... 5<br>Because of social pressure ..... 6<br>Do not want to respond ..... 88 |
| Z4_09                                                                                 | Does your husband drink alcohol?                                      |          |  |  |  |  | Yes ..... 1<br>No ..... 2<br>Not applicable (husband is deceased) ..... 3<br>Do not want to respond ..... 88                                                                                                                                                                                                     |
| Z4_10                                                                                 | Does your husband consume drugs?                                      |          |  |  |  |  | Yes ..... 1<br>No ..... 2<br>Not applicable (husband is deceased) ..... 3<br>Do not want to respond ..... 88                                                                                                                                                                                                     |
| Z4_09a                                                                                | If your husband is not alive, did he drink alcohol when he was alive? |          |  |  |  |  | Yes ..... 1<br>No ..... 2<br>Do not want to respond ..... 88                                                                                                                                                                                                                                                     |
| Z4_10a                                                                                | If your husband is not alive, did he consume drugs when he was alive? |          |  |  |  |  | Yes ..... 1<br>No ..... 2<br>Do not want to respond ..... 88                                                                                                                                                                                                                                                     |

Module End Time:  Hour   Minute

Household Number:

**Module Z5: Wife's Assets that had been brought to Marriage (Female)**

Module start time: Hour   Minute   Respondent ID:  Consent :  Yes ...1 No....2

| Question Number | Question                                                            | Response                 | Response Code                                          |
|-----------------|---------------------------------------------------------------------|--------------------------|--------------------------------------------------------|
| Z5_01           | When you married, did you bring any assets from your parent's home? | <input type="checkbox"/> | Yes.....1>>go to next question<br>No.....2→ End module |

| Name of asset brought at the time of marriage<br><b>Name</b> | Asset (see Asset Code below)<br><b>Z5_02</b> | Value of asset at time of marriage (Tk)<br><b>Z5_03</b> |
|--------------------------------------------------------------|----------------------------------------------|---------------------------------------------------------|
|                                                              |                                              |                                                         |
|                                                              |                                              |                                                         |
|                                                              |                                              |                                                         |
|                                                              |                                              |                                                         |
|                                                              |                                              |                                                         |
|                                                              |                                              |                                                         |

| <b>Asset Codes</b>                            |                               |                                               |                                              |
|-----------------------------------------------|-------------------------------|-----------------------------------------------|----------------------------------------------|
| <b>Consumption Assets (for household use)</b> | Radio/Cassette player .....11 | Mobile telephone / phone .....21              | Fishing net.....54                           |
| Homestead (excluding land).....1              | Wall clock/Watch.....12       | Hand tube well .....22                        | Iron.....55                                  |
| Large tree .....2                             | TV/VCR/CD .....13             | Livestock (for own consumption).....23        | Hand tube well .....56                       |
| Trunk/Suitcase .....3                         | Refrigerator .....14          | Poultry (for own consumption) .....24         | Irrigation equipment, including pump .....57 |
| Bucket/Pots .....4                            | Jewelry (gold/silver).....15  | Cash .....25                                  | Boat.....58                                  |
| Stove/Gas burner.....5                        | Sewing machine .....16        | Mattress.....26                               | Livestock.....59                             |
| Metal cooking pots .....6                     | Bicycle .....17               | Quilt .....27                                 | Poultry.....60                               |
| Bed/Khat/Chowki.....7                         | Rickshaw .....18              | Pillow .....28                                | Other agricultural equipment.....61          |
| Armoire/Cabinet/Alna.....8                    | Motorcycle .....19            | Other assets (list).....29                    | Other vehicles .....62                       |
| Table/chair .....9                            | Other motor vehicle.....20    | <b>Productive Assets (for earning income)</b> | Charcoal maker .....63                       |
| Fans/Iron .....10                             |                               | Sewing machine .....51                        | Other production assets (list).....64        |
|                                               |                               | Rickshaw / van .....52                        |                                              |
|                                               |                               | Mobile phone / phone.....53                   |                                              |

Module End Time: Hour   Minute

Household Number:

**Module WE: Women’s Empowerment in Agriculture (WEAI) Index (Male and Female)**

**Bangladesh: Individual Level Questionnaire**

**International Food Policy Research Institute (IFPRI) & Data Analysis and Technical Assistance Limited (DATA)**

**INSTRUCTIONS ON ADMINISTRATION:**

Enumerator: This questionnaire should be administered to individuals identified in the household roster (Module B) of the household level questionnaire as the primary male and primary female respondents.  
 You should complete this coversheet for each individual identified in the “selection section” even if the individual is not available to be interviewed for reporting purposes. Please double check to ensure:

- You have completed the household questionnaire, at least the first 2 modules;
- You have identified the correct individual;
- You have noted the household ID and individual ID correctly for the person you are about to interview;
- You have gained informed consent for the individual in the household questionnaire;
- You have sought to interview the individual in private or where other members of the household cannot overhear or contribute answers.

Module start time: Hour   Minu   Respondent ID:  Consent :  Yes ...1  
 No.....2

**Module WEA: Individual Identification (Male and Female)**

| Household Identification                                                                                     | Code                                                           |
|--------------------------------------------------------------------------------------------------------------|----------------------------------------------------------------|
| WA01. Household Identification:<br>.....                                                                     | <input type="text"/> <input type="text"/> <input type="text"/> |
| WA02. Census number:<br>.....                                                                                | <input type="text"/> <input type="text"/> <input type="text"/> |
| WA03. Name of primary respondent (code from roster in Module B):<br><br>Last, First:<br>.....                | <input type="text"/> <input type="text"/>                      |
| WA04. Name of respondent (code from roster in Module B of household questionnaire):<br>Last, First:<br>..... | <input type="text"/> <input type="text"/>                      |
| WA05. Sex of respondent: Male..... 1<br>Female ..... 2                                                       | <input type="checkbox"/>                                       |
| WA06. Type of household (enter code from Code 1↓):<br>.....                                                  | <input type="checkbox"/>                                       |

| Interview details                                                         | Code                                                                                  |
|---------------------------------------------------------------------------|---------------------------------------------------------------------------------------|
| WA07. Start time of interview (hh:mm => write in 24 hr time format)       | <input type="text"/> <input type="text"/> : <input type="text"/> <input type="text"/> |
| WA08. End time of interview (hh:mm => write in 24 hr time format)         | <input type="text"/> <input type="text"/> : <input type="text"/> <input type="text"/> |
| WA09. Name/code of enumerator:<br>.....                                   | <input type="text"/> <input type="text"/>                                             |
| WA10. Sex of enumerator: Male..... 1<br>Female..... 2                     | <input type="checkbox"/>                                                              |
| WA11. Outcome of interview (enter code from Code 2↓):                     | <input type="text"/> <input type="text"/>                                             |
| WA12. Ability to be interviewed alone (enter code from Code 3↓):<br>..... | <input type="checkbox"/>                                                              |

Household Number:

**Code list for Module WEA:**

| Code 1 (WA06): Type of Household: | Code2 (WA11): Outcome of interview | Code 3 (WA12): Ability to be interviewed alone |
|-----------------------------------|------------------------------------|------------------------------------------------|
| Male and Female adult ..... 1     | Completed..... 1                   | Alone ..... 1                                  |
| Female, no Male adult ..... 2     | Incomplete ..... 2                 | With other adult females present ..... 2       |
| Male, no Female adult ..... 3     | Absent..... 3                      | With other adult males present ..... 3         |
| No adult ..... 4                  | Refused ..... 4                    | With other adults mixed sex present ..... 4    |
|                                   | Could not locate..... 5            | With children present..... 5                   |

**Module WE2: (Dimension 1): Role in household decision-making around production and income generation (Male and Female)**

Enumerator: The purpose of this module is to get an idea about men’s and women’s relative roles in decision making around income-generating activities. Do not attempt to ensure that responses are the same between the male and female respondent. It is okay for them to be different.

**Code 1: Input into decision making**  
 No input/No opinion at all..... 1  
 Very little input..... 2  
 Input into some decisions..... 3  
 Input into most decisions/ Input into all decisions ..... 4  
 Decision not made/not applicable ..... 5

| Activity      |                                                                                  | Did you (singular) participate in [ACTIVITY] in the past 12 months?<br>Yes ..... 1<br>No ..... 2 >> next activity | How much input did you have in making decisions about [ACTIVITY]?<br><b>CODE 1↑</b> | How much input did you have in decisions on the use of income generated from [ACTIVITY]?<br><b>CODE 1↑</b> |
|---------------|----------------------------------------------------------------------------------|-------------------------------------------------------------------------------------------------------------------|-------------------------------------------------------------------------------------|------------------------------------------------------------------------------------------------------------|
| Activity Code | Activity Description                                                             | <b>WE201</b>                                                                                                      | <b>WE202</b>                                                                        | <b>WE203</b>                                                                                               |
| <b>A</b>      | Food crop farming: crops that are grown primarily for household food consumption | <input type="text"/>                                                                                              | <input type="text"/>                                                                | <input type="text"/>                                                                                       |
| <b>B</b>      | Cash crop farming: crops that are grown primary for sale in the market           | <input type="text"/>                                                                                              | <input type="text"/>                                                                | <input type="text"/>                                                                                       |
| <b>C1</b>     | Large livestock (cow, oxen, cattle)                                              | <input type="text"/>                                                                                              | <input type="text"/>                                                                | <input type="text"/>                                                                                       |
| <b>C2</b>     | Small livestock (goats, pigs, sheep)                                             | <input type="text"/>                                                                                              | <input type="text"/>                                                                | <input type="text"/>                                                                                       |
| <b>C3</b>     | Poultry (chicken, duck, pigeons)                                                 | <input type="text"/>                                                                                              | <input type="text"/>                                                                | <input type="text"/>                                                                                       |

Household Number:

|          |                                                                                 |                      |                      |                      |
|----------|---------------------------------------------------------------------------------|----------------------|----------------------|----------------------|
| <b>D</b> | Non-farm economic activities: small business, self-employment, buy-and-sell     | <input type="text"/> | <input type="text"/> | <input type="text"/> |
| <b>E</b> | Wage and salary employment: in-kind or monetary work both agriculture and other | <input type="text"/> | <input type="text"/> | <input type="text"/> |
| <b>F</b> | Fishing or fish culture                                                         | <input type="text"/> | <input type="text"/> | <input type="text"/> |

**Module WE3a: (Dimension 2) Access to productive capital (Male and Female)**

Now we would like to know about your household's ownership/use of productive assets.

Enumerator: The purpose of this module is to get an idea about men's and women's access to capital or assets and their ability to control use of the resource. Again, do not attempt to ensure that responses are the same between the male and female respondent. It is okay for them to be different.

\*\*If the number of the shared in land is higher, the person who uses or who have the opportunity to use land should be treated as owner.

| Productive Capital |                                    | Does anyone in your household currently have this [ITEM]? | How many of [ITEM] does your household currently have? | Who would you say owns most of the [ITEM]? |                      |                      | Who would you say can decide whether to sell [ITEM] most of the time? |                      |                      | Who would you say can decide whether to give away [ITEM] most of the time? |                      |                      | Who would you say can decide to mortgage or rent out [ITEM] most of the time? |                      |                      | Who contributes most to decisions regarding a new purchase of [ITEM]? |                      |                      | Do you own any of the item? |
|--------------------|------------------------------------|-----------------------------------------------------------|--------------------------------------------------------|--------------------------------------------|----------------------|----------------------|-----------------------------------------------------------------------|----------------------|----------------------|----------------------------------------------------------------------------|----------------------|----------------------|-------------------------------------------------------------------------------|----------------------|----------------------|-----------------------------------------------------------------------|----------------------|----------------------|-----------------------------|
| Productive Capital |                                    | WE3a_01a                                                  | WE 3a_01b                                              | WE 3a_02a                                  | WE 3a_02 b           | WE 3a_02 c           | WE 3a_03a                                                             | WE 3a_03b            | WE 3a_03c            | WE 3a_04a                                                                  | WE 3a_04 b           | WE 3a_04 c           | WE 3a_05a                                                                     | WE 3a_05 b           | WE 3a_05 c           | WE3a_06a                                                              | WE3 a_06b            | WE3 a_06c            | WE3a_07                     |
| <b>A</b>           | Agricultural land (pieces/polts)** | <input type="text"/>                                      | <input type="text"/>                                   | <input type="text"/>                       | <input type="text"/> | <input type="text"/> | <input type="text"/>                                                  | <input type="text"/> | <input type="text"/> | <input type="text"/>                                                       | <input type="text"/> | <input type="text"/> | <input type="text"/>                                                          | <input type="text"/> | <input type="text"/> | <input type="text"/>                                                  | <input type="text"/> | <input type="text"/> | <input type="text"/>        |
| <b>B</b>           | Large livestock (oxen, buffalo)    | <input type="text"/>                                      | <input type="text"/>                                   | <input type="text"/>                       | <input type="text"/> | <input type="text"/> | <input type="text"/>                                                  | <input type="text"/> | <input type="text"/> | <input type="text"/>                                                       | <input type="text"/> | <input type="text"/> | <input type="text"/>                                                          | <input type="text"/> | <input type="text"/> | <input type="text"/>                                                  | <input type="text"/> | <input type="text"/> | <input type="text"/>        |
| <b>C</b>           | Small livestock (goats, sheep)     | <input type="text"/>                                      | <input type="text"/>                                   | <input type="text"/>                       | <input type="text"/> | <input type="text"/> | <input type="text"/>                                                  | <input type="text"/> | <input type="text"/> | <input type="text"/>                                                       | <input type="text"/> | <input type="text"/> | <input type="text"/>                                                          | <input type="text"/> | <input type="text"/> | <input type="text"/>                                                  | <input type="text"/> | <input type="text"/> | <input type="text"/>        |



Household Number:

|                                 |                                                                              |                      |                      |                        |                      |                      |                      |                      |                      |                      |                      |                      |                      |                      |                      |                      |                      |                      |                      |
|---------------------------------|------------------------------------------------------------------------------|----------------------|----------------------|------------------------|----------------------|----------------------|----------------------|----------------------|----------------------|----------------------|----------------------|----------------------|----------------------|----------------------|----------------------|----------------------|----------------------|----------------------|----------------------|
| <b>D</b>                        | Chickens, Ducks, Turkeys, Pigeons                                            | <input type="text"/> | <input type="text"/> | <input type="text"/>   | <input type="text"/> | <input type="text"/> | <input type="text"/> | <input type="text"/> | <input type="text"/> | <input type="text"/> | <input type="text"/> | <input type="text"/> | <input type="text"/> | <input type="text"/> | <input type="text"/> | <input type="text"/> | <input type="text"/> | <input type="text"/> | <input type="text"/> |
| <b>E</b>                        | Fish pond or fishing equipment                                               | <input type="text"/> | <input type="text"/> | <input type="text"/>   | <input type="text"/> | <input type="text"/> | <input type="text"/> | <input type="text"/> | <input type="text"/> | <input type="text"/> | <input type="text"/> | <input type="text"/> | <input type="text"/> | <input type="text"/> | <input type="text"/> | <input type="text"/> | <input type="text"/> | <input type="text"/> | <input type="text"/> |
| <b>F</b>                        | Farm equipment (non-mechanized)                                              | <input type="text"/> | <input type="text"/> | <input type="text"/>   | <input type="text"/> | <input type="text"/> | <input type="text"/> | <input type="text"/> | <input type="text"/> | <input type="text"/> | <input type="text"/> | <input type="text"/> | <input type="text"/> | <input type="text"/> | <input type="text"/> | <input type="text"/> | <input type="text"/> | <input type="text"/> | <input type="text"/> |
| <b>G</b>                        | Farm equipment (mechanized)                                                  | <input type="text"/> | <input type="text"/> | <input type="text"/>   | <input type="text"/> | <input type="text"/> | <input type="text"/> | <input type="text"/> | <input type="text"/> | <input type="text"/> | <input type="text"/> | <input type="text"/> | <input type="text"/> | <input type="text"/> | <input type="text"/> | <input type="text"/> | <input type="text"/> | <input type="text"/> | <input type="text"/> |
| <b>H</b>                        | Nonfarm business equipment                                                   | <input type="text"/> | <input type="text"/> | <input type="text"/>   | <input type="text"/> | <input type="text"/> | <input type="text"/> | <input type="text"/> | <input type="text"/> | <input type="text"/> | <input type="text"/> | <input type="text"/> | <input type="text"/> | <input type="text"/> | <input type="text"/> | <input type="text"/> | <input type="text"/> | <input type="text"/> | <input type="text"/> |
| <b>I</b>                        | House (and other structures)                                                 | <input type="text"/> | <input type="text"/> | <input type="text"/>   | <input type="text"/> | <input type="text"/> | <input type="text"/> | <input type="text"/> | <input type="text"/> | <input type="text"/> | <input type="text"/> | <input type="text"/> | <input type="text"/> | <input type="text"/> | <input type="text"/> | <input type="text"/> | <input type="text"/> | <input type="text"/> | <input type="text"/> |
| <b>J</b>                        | Large consumer durables (fridge, TV, sofa)                                   | <input type="text"/> | <input type="text"/> | <input type="text"/>   | <input type="text"/> | <input type="text"/> | <input type="text"/> | <input type="text"/> | <input type="text"/> | <input type="text"/> | <input type="text"/> | <input type="text"/> | <input type="text"/> | <input type="text"/> | <input type="text"/> | <input type="text"/> | <input type="text"/> | <input type="text"/> | <input type="text"/> |
| <b>K</b>                        | Small consumer durables (radio, cookware)                                    | <input type="text"/> | <input type="text"/> | <input type="text"/>   | <input type="text"/> | <input type="text"/> | <input type="text"/> | <input type="text"/> | <input type="text"/> | <input type="text"/> | <input type="text"/> | <input type="text"/> | <input type="text"/> | <input type="text"/> | <input type="text"/> | <input type="text"/> | <input type="text"/> | <input type="text"/> | <input type="text"/> |
| <b>L</b>                        | Cell phone                                                                   | <input type="text"/> | <input type="text"/> | <input type="text"/>   | <input type="text"/> | <input type="text"/> | <input type="text"/> | <input type="text"/> | <input type="text"/> | <input type="text"/> | <input type="text"/> | <input type="text"/> | <input type="text"/> | <input type="text"/> | <input type="text"/> | <input type="text"/> | <input type="text"/> | <input type="text"/> | <input type="text"/> |
| <b>M</b>                        | Other land not used for agricultural purposes (residential /commercial land) | <input type="text"/> | <input type="text"/> | <input type="text"/>   | <input type="text"/> | <input type="text"/> | <input type="text"/> | <input type="text"/> | <input type="text"/> | <input type="text"/> | <input type="text"/> | <input type="text"/> | <input type="text"/> | <input type="text"/> | <input type="text"/> | <input type="text"/> | <input type="text"/> | <input type="text"/> | <input type="text"/> |
| <b>N</b>                        | Means of transportation (bicycle, rickshaw, motorcycle, car)                 | <input type="text"/> | <input type="text"/> | <input type="text"/>   | <input type="text"/> | <input type="text"/> | <input type="text"/> | <input type="text"/> | <input type="text"/> | <input type="text"/> | <input type="text"/> | <input type="text"/> | <input type="text"/> | <input type="text"/> | <input type="text"/> | <input type="text"/> | <input type="text"/> | <input type="text"/> | <input type="text"/> |
| <b>CODE 1</b>                   |                                                                              |                      |                      |                        |                      |                      |                      |                      |                      |                      |                      |                      |                      |                      |                      |                      |                      |                      |                      |
| Self..... 1                     |                                                                              |                      |                      | Not applicable..... 98 |                      |                      |                      |                      |                      |                      |                      |                      |                      |                      |                      |                      |                      |                      |                      |
| Spouse..... 2                   |                                                                              |                      |                      |                        |                      |                      |                      |                      |                      |                      |                      |                      |                      |                      |                      |                      |                      |                      |                      |
| Other household member..... 3   |                                                                              |                      |                      |                        |                      |                      |                      |                      |                      |                      |                      |                      |                      |                      |                      |                      |                      |                      |                      |
| Member outside household..... 4 |                                                                              |                      |                      |                        |                      |                      |                      |                      |                      |                      |                      |                      |                      |                      |                      |                      |                      |                      |                      |

**Module WE3B: Agricultural Extension (Male and Female)**

| Q. No.  | Question                                                                                                                                     | Response             | Response options                                                                                                                                                                                                                                       |
|---------|----------------------------------------------------------------------------------------------------------------------------------------------|----------------------|--------------------------------------------------------------------------------------------------------------------------------------------------------------------------------------------------------------------------------------------------------|
| WE3B_07 | Where do you typically get information on farming or livestock related topics such as new seeds, technology, crop rotation or animal health? | <input type="text"/> | Government agency or outlet ..... 1<br>NGO or NGO outlet..... 2<br>Private shop/suppliers ..... 3<br>Community members or cooperative ..... 4<br>Family member..... 5<br>Media (radio/TV/newspaper) ..... 6<br>Not applicable/do not get advice..... 7 |
| WE3B_08 | Have you (yourself) ever met with an agricultural extension worker or livestock/fisheries extension worker in the past 12 months?            | <input type="text"/> | Yes..... 1<br>No ..... 2 >> Next section                                                                                                                                                                                                               |

Household Number:

|         |                                                                                                                         |                      |                                                                |
|---------|-------------------------------------------------------------------------------------------------------------------------|----------------------|----------------------------------------------------------------|
| WE3B_09 | How many times did you meet with the agricultural extension worker or livestock/fisheries worker in the past 12 months? | <input type="text"/> | [Enter number of visits]                                       |
| WE3B_10 | The last time you met with an extension worker, were they a male or female?                                             | <input type="text"/> | Male ..... 1<br>Female ..... 2<br>Both male and female ..... 3 |

**Module WE3C: (Dimension 3) Income (Male and Female)**

Enumerator: The purpose of this module is to get an idea about how the surplus of household, men’s and women’s incomes, after food needs are met, is allocated among other expenditure categories: Do not attempt to ensure that responses are the same between male and female respondent. It is okay for them to be different.

| Q. No.                    | Question                                                                                                                                                                                                                                   | Response                                                                                                                                                                                  | Response options/Instructions                                                                                                                                                                                                                                                                                                                                                                                                                                                                                                                                                                                              |
|---------------------------|--------------------------------------------------------------------------------------------------------------------------------------------------------------------------------------------------------------------------------------------|-------------------------------------------------------------------------------------------------------------------------------------------------------------------------------------------|----------------------------------------------------------------------------------------------------------------------------------------------------------------------------------------------------------------------------------------------------------------------------------------------------------------------------------------------------------------------------------------------------------------------------------------------------------------------------------------------------------------------------------------------------------------------------------------------------------------------------|
| WE3C_11                   | Do you alone have any money you can decide what to spend on?                                                                                                                                                                               | <input type="text"/>                                                                                                                                                                      | Yes ..... 1<br>No ..... 2                                                                                                                                                                                                                                                                                                                                                                                                                                                                                                                                                                                                  |
| WE3C_12                   | In comparison to your partner, do you; [READ RESPONSES]:<br>Enumerator: Skip this question if the respondent has no partner.                                                                                                               | <input type="text"/>                                                                                                                                                                      | Earn more money than him/her ..... 1<br>Earn less money than him/her ..... 2<br>Earn about the same money as him/her ..... 3<br>Partner does not earn money ..... 4<br>I do not earn money ..... 5<br>Both partner and I do not earn money ..... 6<br>Do not know how much partner earns ..... 7<br>Not Applicable ..... 98                                                                                                                                                                                                                                                                                                |
| Question: Household level |                                                                                                                                                                                                                                            |                                                                                                                                                                                           |                                                                                                                                                                                                                                                                                                                                                                                                                                                                                                                                                                                                                            |
| WE3C_13                   | In the last 12 months, after providing food for the family, what did your household spend your remaining money on?<br>Enumerator: List up to 5 in order of importance<br>[DO NOT PROMPT]. If answer to WE3C_13 is from 1-20, go to WE3C_15 | If answer to WE3C_13 is from 1-20, go to WE3C_15<br><br>A    B    C    D    E<br><input type="text"/> <input type="text"/> <input type="text"/> <input type="text"/> <input type="text"/> | Clothes/shoes for myself ..... 1<br>Clothes/shoes for my spouse ..... 2<br>Clothes/shoes for my children ..... 3<br>School fees of school supplies for children ..... 4<br>Consumer durables ..... 5<br>Fix or improve house ..... 6<br>Buy asset for farming ..... 7<br>Buy asset for business ..... 8<br>Buy jewelry ..... 9<br>Services (beauty/hair/etc) ..... 10<br>Lend money to friends and relatives ..... 11<br>Make religious/ charitable donations ..... 12<br>Travel to visit friends/relatives ..... 13<br>Save for future ..... 14<br>Medicines or health needs ..... 15<br>Communication (airtime) ..... 16 |

Household Number:

|                            |                                                                                                                                                                                             |                                                                                                                                                                                                       |                                                                                                                                                                                                                                                                                                                                                                                                                                                                                                                                                                                                                                                                                                                                                                                                                                                    |
|----------------------------|---------------------------------------------------------------------------------------------------------------------------------------------------------------------------------------------|-------------------------------------------------------------------------------------------------------------------------------------------------------------------------------------------------------|----------------------------------------------------------------------------------------------------------------------------------------------------------------------------------------------------------------------------------------------------------------------------------------------------------------------------------------------------------------------------------------------------------------------------------------------------------------------------------------------------------------------------------------------------------------------------------------------------------------------------------------------------------------------------------------------------------------------------------------------------------------------------------------------------------------------------------------------------|
|                            |                                                                                                                                                                                             |                                                                                                                                                                                                       | Buy consumables (toiletries, paraffin, etc.)...17<br>Social events (weddings/funerals/sports) .....18<br>Drinking alcohol and smoking .....19<br>Unknown how the money was spent .....20<br>Household or myself has no money ..... 98 >>WE3C_14                                                                                                                                                                                                                                                                                                                                                                                                                                                                                                                                                                                                    |
| WE3C_14                    | In the last 12 months, if the household did not have any remaining money, what is the reason?<br><br>Enumerator: List up to 3 in order of importance. Do not prompt.                        | A      B      C<br><input type="text"/> <input type="text"/> <input type="text"/>                                                                                                                     | Bad harvest .....1<br>Irregular income/business is slow .....2<br>Other negative shock (illness).....3<br>Unexpected expenditures .....4<br>No control over extra money.....5                                                                                                                                                                                                                                                                                                                                                                                                                                                                                                                                                                                                                                                                      |
| Question: Individual level |                                                                                                                                                                                             |                                                                                                                                                                                                       |                                                                                                                                                                                                                                                                                                                                                                                                                                                                                                                                                                                                                                                                                                                                                                                                                                                    |
| WE3C_15                    | In the last 12 months, after providing food for the family, what did you (singular) spend your remaining money on?<br><br>Enumerator: List up to 5 in order of importance<br>Do not prompt. | If answer to WE3C_15 is from 1-20, go to Module WE3D<br><br>A      B      C      D      E<br><input type="text"/> <input type="text"/> <input type="text"/> <input type="text"/> <input type="text"/> | Clothes/shoes for myself .....1<br>Clothes/shoes for my spouse.....2<br>Clothes/shoes for my children.....3<br>School fees of school supplies for children ....4<br>Consumer durables .....5<br>Fix or improve house .....6<br>Buy asset for farming .....7<br>Buy asset for business .....8<br>Buy jewelry.....9<br>Services (beauty/hair/etc).....10<br>Lend money to friends and relatives .....11<br>Make religious/ charitable donations .....12<br>Travel to visit friends/relatives.....13<br>Save for future .....14<br>Medicines or health needs.....15<br>Communication (airtime).....16<br>Buy consumables (toiletries, paraffin, etc.)...17<br>Social events (weddings/funerals/sports) .....18<br>Drinking alcohol and smoking .....19<br>Unknown how the money was spent .....20<br>Household or myself has no money....98>> WE3C_16 |
| WE3C_16                    | In the last 12 months, if you (singular) did not have any remaining money, what is the reason?<br><br>Enumerator: List up to 3 in order of importance. Do not prompt                        | A      B      C<br><input type="text"/> <input type="text"/> <input type="text"/>                                                                                                                     | Bad harvest .....1<br>Irregular income/business is slow .....2<br>Other negative shock (illness).....3<br>Unexpected expenditures .....4<br>No control over extra money.....5                                                                                                                                                                                                                                                                                                                                                                                                                                                                                                                                                                                                                                                                      |

Household Number:

**Module WE3D: Access to loans (Male and Female)**

Now I will ask you about any loans taken for the household in the last 12 months.

| Lending sources      |                                                                                                       | Has anyone in your household taken any loans or borrowed cash/in-kind from [SOURCE] in the past 12 months?<br>Yes, cash ..... 1<br>Yes, in-kind ..... 2<br>Yes, cash and in-kind ..... 3<br>No ..... 4 >> next source<br>Don't know ..... 97 >> next source | Who made the decision to borrow from [SOURCE]?<br>Self ..... 1<br>Spouse ..... 2<br>Other household member ..... 3<br>Other member outside the household ..... 4<br>Not applicable ..... 98<br><br>For joint decisions, multiple responses are possible |                      |                      | Who makes the decision about what to do with the money/ item borrow from [SOURCE]?<br>Self ..... 1<br>Spouse ..... 2<br>Other household member ..... 3<br>Other member outside the household ..... 4<br>Not applicable ..... 98<br><br>For joint decisions, multiple responses are possible |                      |                      |
|----------------------|-------------------------------------------------------------------------------------------------------|-------------------------------------------------------------------------------------------------------------------------------------------------------------------------------------------------------------------------------------------------------------|---------------------------------------------------------------------------------------------------------------------------------------------------------------------------------------------------------------------------------------------------------|----------------------|----------------------|---------------------------------------------------------------------------------------------------------------------------------------------------------------------------------------------------------------------------------------------------------------------------------------------|----------------------|----------------------|
| Lending source names |                                                                                                       | WE3d_17                                                                                                                                                                                                                                                     | WE3d_18a                                                                                                                                                                                                                                                | WE3d_18b             | WE3d_18c             | WE3d_19a                                                                                                                                                                                                                                                                                    | WE3d_19b             | WE3d_19c             |
| A                    | Non-governmental organization (NGO)                                                                   | <input type="text"/>                                                                                                                                                                                                                                        | <input type="text"/>                                                                                                                                                                                                                                    | <input type="text"/> | <input type="text"/> | <input type="text"/>                                                                                                                                                                                                                                                                        | <input type="text"/> | <input type="text"/> |
| B                    | Informal lender                                                                                       | <input type="text"/>                                                                                                                                                                                                                                        | <input type="text"/>                                                                                                                                                                                                                                    | <input type="text"/> | <input type="text"/> | <input type="text"/>                                                                                                                                                                                                                                                                        | <input type="text"/> | <input type="text"/> |
| C                    | Formal lender (bank/financial institution)                                                            | <input type="text"/>                                                                                                                                                                                                                                        | <input type="text"/>                                                                                                                                                                                                                                    | <input type="text"/> | <input type="text"/> | <input type="text"/>                                                                                                                                                                                                                                                                        | <input type="text"/> | <input type="text"/> |
| D                    | Friends or relatives                                                                                  | <input type="text"/>                                                                                                                                                                                                                                        | <input type="text"/>                                                                                                                                                                                                                                    | <input type="text"/> | <input type="text"/> | <input type="text"/>                                                                                                                                                                                                                                                                        | <input type="text"/> | <input type="text"/> |
| E                    | Non-institutional lending group, such as ROSCA (savings/credit group), merry-go-rounds, tontines etc. | <input type="text"/>                                                                                                                                                                                                                                        | <input type="text"/>                                                                                                                                                                                                                                    | <input type="text"/> | <input type="text"/> | <input type="text"/>                                                                                                                                                                                                                                                                        | <input type="text"/> | <input type="text"/> |

Household Number:

**Module WE4: Individual Leadership and Influence in the Community (Male and Female)**

Enumerator: The purpose of this module is to get an idea about men’s and women’s potential for leadership and influence in the communities where they live. Again, do not attempt to ensure that responses are the same between the male and female respondent. It is okay for them to be different.

Now I have a few questions about how comfortable you feel speaking up in public when the community needs to make important decisions.

| Q. No. | Question                                                                                                                                                | Response                                                                                                                      |
|--------|---------------------------------------------------------------------------------------------------------------------------------------------------------|-------------------------------------------------------------------------------------------------------------------------------|
| WE4.01 | Do you feel comfortable speaking up in public to help decide on infrastructure (like small wells, roads, water supplies) to be built in your community? | No, not at all comfortable ..... 1<br>Yes, but with difficulty ..... 2<br>Yes, comfortably ..... 3<br>NOT APPLICABLE ..... 98 |
| WE4.02 | Do you feel comfortable speaking up in public to ensure proper payment of wages for public works or other similar programs (such as EGPP, FFW)?         | No, not at all comfortable ..... 1<br>Yes, but with difficulty ..... 2<br>Yes, comfortably ..... 3<br>NOT APPLICABLE ..... 98 |
| WE4.03 | Do you feel comfortable speaking up in public to protest the misbehavior of authorities or elected officials?                                           | No, not at all comfortable ..... 1<br>Yes, but with difficulty ..... 2<br>Yes, comfortably ..... 3<br>NOT APPLICABLE ..... 98 |

| Q. No.  | Question                                                                                                                                                                                                                           | Response             | Response options/Instructions                                                                                                                                                  |
|---------|------------------------------------------------------------------------------------------------------------------------------------------------------------------------------------------------------------------------------------|----------------------|--------------------------------------------------------------------------------------------------------------------------------------------------------------------------------|
| WE4.04  | Do you feel that a [man / woman] like yourself can generally change things in the community where you live if s/he wants to?                                                                                                       | <input type="text"/> | No, not at all ..... 1<br>Yes, but with a great deal of difficulty... 2<br>Yes, but with a little difficulty ..... 3<br>Yes, fairly easily ..... 4<br>Yes, very easily ..... 5 |
| WE4.05  | In the last 12 months, have you                                                                                                                                                                                                    |                      |                                                                                                                                                                                |
| WE4.05A | Contributed money or time to building small wells or maintenance of irrigation facilities in your community?                                                                                                                       | <input type="text"/> | Yes..... 1<br>No ..... 2                                                                                                                                                       |
| WE4.05B | Contributed money or time to building or maintaining roads in your community?                                                                                                                                                      | <input type="text"/> | Yes..... 1<br>No ..... 2                                                                                                                                                       |
| WE4.05C | Contributed money or time to town development projects or public works projects in your community?                                                                                                                                 | <input type="text"/> | Yes..... 1<br>No ..... 2                                                                                                                                                       |
| WE4.05D | Contributed money or time to building or maintaining your local mosque/church/temple?                                                                                                                                              | <input type="text"/> | Yes..... 1<br>No ..... 2                                                                                                                                                       |
| WE4.05E | In the last year, did you give money to any other family because someone in their family was sick?                                                                                                                                 | <input type="text"/> | Yes..... 1<br>No ..... 2                                                                                                                                                       |
| WE4.05F | In the last year, did you help another family out with agricultural labor?                                                                                                                                                         | <input type="text"/> | Yes..... 1<br>No ..... 2                                                                                                                                                       |
| WE4.05G | In the last year, did you help another family out when they needed help with child care?                                                                                                                                           | <input type="text"/> | Yes..... 1<br>No ..... 2                                                                                                                                                       |
| WE4.06  | Please imagine a nine-step ladder, where on the bottom, the first step, stand people who have NO influence on the community, and step 9, the highest step, stand those who have influence in the community. On which step are you? | <input type="text"/> | [Enter step 1 – 9]<br>Enumerator show the ladder in the next page                                                                                                              |

Household Number:

People in this step have HIGHEST influence on the community

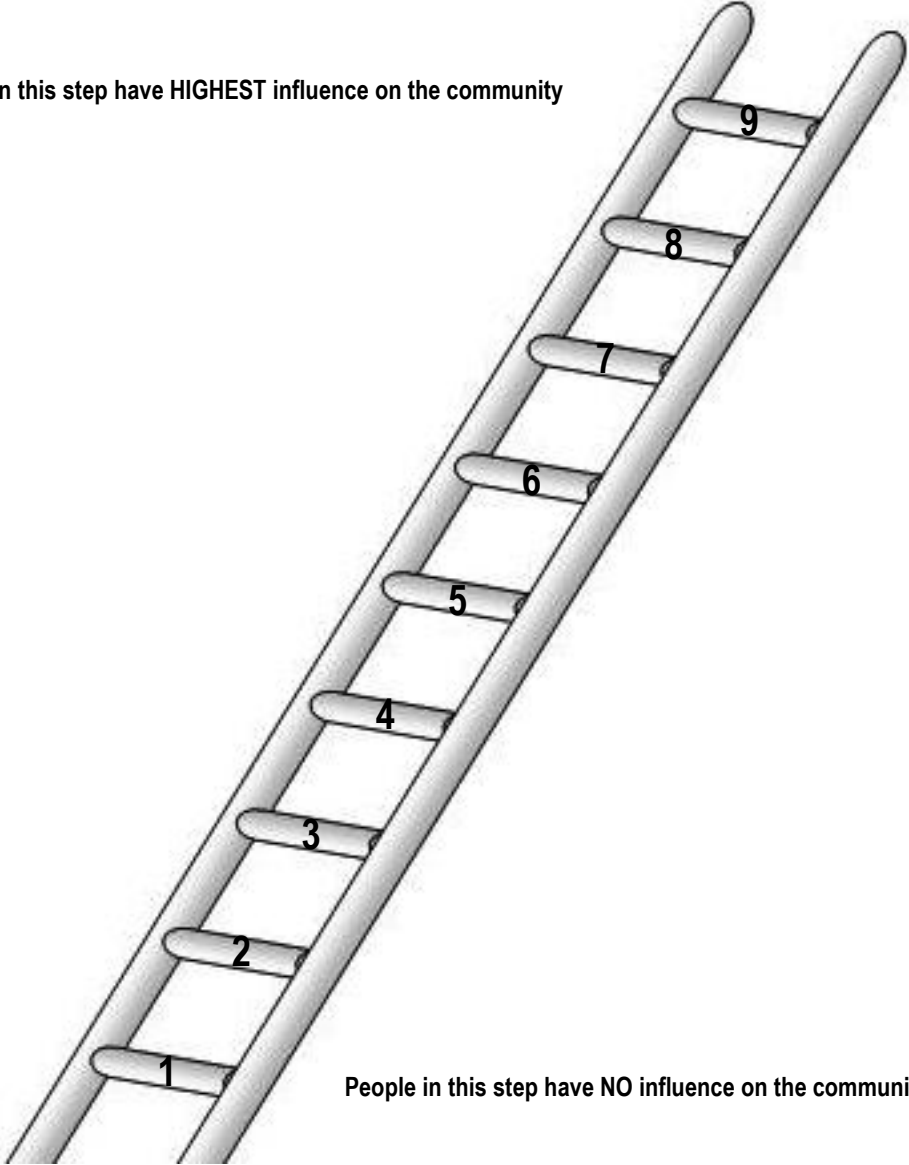

People in this step have NO influence on the community

Household Number:

**Module WE4 continued: Group Membership (Male and Female)**

Now I'm going to ask you about groups in the community. These can be either formal or informal and customary groups.

| Group membership |                                                                                   | Is there a [GROUP] in your community?<br>Yes..... 1<br>No..... 2>> next row<br>Don't know... 97>>next row | Are you an active member of any [GROUP]?<br>Yes..... 1<br>No ..... 2 | Do you have a leadership position in this [GROUP]?<br>Yes... 1 >> WE4_11<br>No ... 2 | Have you ever had a leadership position in this [GROUP]?<br>Yes ..... 1<br>No..... 2 | Is this a single-sex group?<br>Yes ..... 1<br>No ..... 2 | How often does the [GROUP] meet?<br>More than once a week .. 1<br>Once a week ..... 2<br>Once every two weeks.... 3<br>Once a month ..... 4<br>Less than once a month .. 5 | Out of the last 5 meetings, how many did you attend?<br>[Number of meetings] |
|------------------|-----------------------------------------------------------------------------------|-----------------------------------------------------------------------------------------------------------|----------------------------------------------------------------------|--------------------------------------------------------------------------------------|--------------------------------------------------------------------------------------|----------------------------------------------------------|----------------------------------------------------------------------------------------------------------------------------------------------------------------------------|------------------------------------------------------------------------------|
|                  | Group Names                                                                       | WE4.07                                                                                                    | WE4.08                                                               | WE4.09                                                                               | WE4.10                                                                               | WE4.11                                                   | WE4.12                                                                                                                                                                     | WE4.13                                                                       |
| A                | Agricultural / livestock/ fisheries producer's group (including marketing groups) | <input type="text"/>                                                                                      | <input type="text"/>                                                 | <input type="text"/>                                                                 | <input type="text"/>                                                                 | <input type="text"/>                                     | <input type="text"/>                                                                                                                                                       | <input type="text"/>                                                         |
| B                | Water users' group                                                                | <input type="text"/>                                                                                      | <input type="text"/>                                                 | <input type="text"/>                                                                 | <input type="text"/>                                                                 | <input type="text"/>                                     | <input type="text"/>                                                                                                                                                       | <input type="text"/>                                                         |
| C                | Forest users' group                                                               | <input type="text"/>                                                                                      | <input type="text"/>                                                 | <input type="text"/>                                                                 | <input type="text"/>                                                                 | <input type="text"/>                                     | <input type="text"/>                                                                                                                                                       | <input type="text"/>                                                         |
| D                | Credit or microfinance group (incl. ROSCAs/merry-go-rounds)                       | <input type="text"/>                                                                                      | <input type="text"/>                                                 | <input type="text"/>                                                                 | <input type="text"/>                                                                 | <input type="text"/>                                     | <input type="text"/>                                                                                                                                                       | <input type="text"/>                                                         |
| E                | Mutual help or insurance group (including burial societies)                       | <input type="text"/>                                                                                      | <input type="text"/>                                                 | <input type="text"/>                                                                 | <input type="text"/>                                                                 | <input type="text"/>                                     | <input type="text"/>                                                                                                                                                       | <input type="text"/>                                                         |
| F                | Trade and business association                                                    | <input type="text"/>                                                                                      | <input type="text"/>                                                 | <input type="text"/>                                                                 | <input type="text"/>                                                                 | <input type="text"/>                                     | <input type="text"/>                                                                                                                                                       | <input type="text"/>                                                         |
| G                | Civic groups (improving community) or charitable group (helping others)           | <input type="text"/>                                                                                      | <input type="text"/>                                                 | <input type="text"/>                                                                 | <input type="text"/>                                                                 | <input type="text"/>                                     | <input type="text"/>                                                                                                                                                       | <input type="text"/>                                                         |
| H                | Local government                                                                  | <input type="text"/>                                                                                      | <input type="text"/>                                                 | <input type="text"/>                                                                 | <input type="text"/>                                                                 | <input type="text"/>                                     | <input type="text"/>                                                                                                                                                       | <input type="text"/>                                                         |
| I                | Religious group                                                                   | <input type="text"/>                                                                                      | <input type="text"/>                                                 | <input type="text"/>                                                                 | <input type="text"/>                                                                 | <input type="text"/>                                     | <input type="text"/>                                                                                                                                                       | <input type="text"/>                                                         |
| J                | Other women's group (only if it does not fit into one of the other categories)    | <input type="text"/>                                                                                      | <input type="text"/>                                                 | <input type="text"/>                                                                 | <input type="text"/>                                                                 | <input type="text"/>                                     | <input type="text"/>                                                                                                                                                       | <input type="text"/>                                                         |
| K                | Other (specify)                                                                   | <input type="text"/>                                                                                      | <input type="text"/>                                                 | <input type="text"/>                                                                 | <input type="text"/>                                                                 | <input type="text"/>                                     | <input type="text"/>                                                                                                                                                       | <input type="text"/>                                                         |

Household Number:

**Module WE5a: Decision Making (Male and Female)**

I will now ask you some questions about decision making pertaining to the household

Enumerator: The purpose of this module is to get additional information about decision making within households.

Again, do not attempt to ensure that responses are the same between the male and female respondent. It is okay for them to be different.

| Serial no |                                                          | When decisions are made regarding the following aspects of household life, who is it that normally takes the decision?<br><br>Self.....1 >>skip to the next activity<br>Husband/ wife..... 2<br>Someone else in the household ..... 3<br>Someone outside the household/other... 4<br>Not applicable.....98 >> skip to the next activity<br><br>In case of joint decisions, there could be multiple responses |          |          | To what extent do you feel you can make your own personal decisions regarding these aspects of household life if you want(ed) to?<br><br>Not at all ..... 1<br>Small extent..... 2<br>Medium extent..... 3<br>To a high extent..... 4 |  |
|-----------|----------------------------------------------------------|--------------------------------------------------------------------------------------------------------------------------------------------------------------------------------------------------------------------------------------------------------------------------------------------------------------------------------------------------------------------------------------------------------------|----------|----------|---------------------------------------------------------------------------------------------------------------------------------------------------------------------------------------------------------------------------------------|--|
| CODE      | ACTIVITY                                                 | WE5a_01a                                                                                                                                                                                                                                                                                                                                                                                                     | WE5a_01b | WE5a_01c | WE5a_02                                                                                                                                                                                                                               |  |
| A         | What inputs to buy for agricultural production?          |                                                                                                                                                                                                                                                                                                                                                                                                              |          |          | <input type="text"/>                                                                                                                                                                                                                  |  |
| B         | What types of crops to grow for agricultural production? |                                                                                                                                                                                                                                                                                                                                                                                                              |          |          | <input type="text"/>                                                                                                                                                                                                                  |  |
| C         | When or who would take crops to the market?              |                                                                                                                                                                                                                                                                                                                                                                                                              |          |          | <input type="text"/>                                                                                                                                                                                                                  |  |
| D         | Livestock raising?                                       |                                                                                                                                                                                                                                                                                                                                                                                                              |          |          | <input type="text"/>                                                                                                                                                                                                                  |  |
| E         | Your own wage or salary employment?                      |                                                                                                                                                                                                                                                                                                                                                                                                              |          |          | <input type="text"/>                                                                                                                                                                                                                  |  |
| F         | Major household expenditures?                            |                                                                                                                                                                                                                                                                                                                                                                                                              |          |          | <input type="text"/>                                                                                                                                                                                                                  |  |
| G         | Minor household expenditures?                            |                                                                                                                                                                                                                                                                                                                                                                                                              |          |          | <input type="text"/>                                                                                                                                                                                                                  |  |



**Module WE5b: Motivation for decision-making (Male and Female)**

I will tell you a few stories about the agricultural practices of a few farmers. These questions are a little different from the rest. So feel free to take your time. After each story I will ask you with whom you identify the most and least. I will also want to know whether you are very different from them, very similar to them or somewhere in between. There are no right or wrong answers to these.

Enumerator: Read out each story. Read out the next question and their codes loudly. Circle one response.

|   |                                                               |          | STORY                                                                                                                                                                                                                                                | QUESTION 1                                                                                      | QUESTION 2                                                                                                                                | QUESTION 3                                                                                                                                  |
|---|---------------------------------------------------------------|----------|------------------------------------------------------------------------------------------------------------------------------------------------------------------------------------------------------------------------------------------------------|-------------------------------------------------------------------------------------------------|-------------------------------------------------------------------------------------------------------------------------------------------|---------------------------------------------------------------------------------------------------------------------------------------------|
| A | The types of crops to grow for consumption and sale in market | WE5ba_01 | <i>“Anzira (Abdullah) can’t grow other types of crops here for consumption and sale in market. Beans, sweet potato and maize are the only crops that grow here.”</i>                                                                                 | Are you like this person?<br><br>Yes ..... 1<br>No ..... 2 → Question 3<br><input type="text"/> | Are you completely the same or somewhat the same?<br><br>Completely the same ..... 1<br>Somewhat the same ..... 2<br><input type="text"/> | Are you completely different or somewhat different?<br><br>Completely different .....1<br>Somewhat different .....2<br><input type="text"/> |
|   |                                                               | WE5ba_02 | <i>“[PERSON’S NAME] is a farmer and grows beans, sweet potato, and maize because her spouse, or another person or group in her community tells her she must grow these crops. She does what they tell her to do.”</i>                                | Are you like this person?<br><br>Yes .....1<br>No .....2 → Question 3<br><input type="text"/>   | Are you completely the same or somewhat the same?<br><br>Completely the same ..... 1<br>Somewhat the same ..... 2<br><input type="text"/> | Are you completely different or somewhat different?<br><br>Completely different .....1<br>Somewhat different .....2<br><input type="text"/> |
|   |                                                               | WE5ba_03 | <i>“[PERSON’S NAME] grows the crops for agricultural production that her family or community expect. She wants them to approve of her as a good farmer.”</i>                                                                                         | Are you like this person?<br><br>Yes ..... 1<br>No .....2 → Question 3<br><input type="text"/>  | Are you completely the same or somewhat the same?<br><br>Completely the same ..... 1<br>Somewhat the same ..... 2<br><input type="text"/> | Are you completely different or somewhat different?<br><br>Completely different .....1<br>Somewhat different .....2<br><input type="text"/> |
|   |                                                               | WE5ba_04 | <i>“[PERSON’S NAME] chooses the crops that she personally wants to grow for consumption and sale in market and thinks are best for her family and business. She values growing these crops. If she changed her mind, she could act differently.”</i> | Are you like this person?<br><br>Yes .....1<br>No .....2 → Question 3<br><input type="text"/>   | Are you completely the same or somewhat the same?<br><br>Completely the same ..... 1<br>Somewhat the same ..... 2<br><input type="text"/> | Are you completely different or somewhat different?<br><br>Completely different .....1<br>Somewhat different .....2<br><input type="text"/> |

Household Number:

|          |                                           |                 |                                                                                                                                                                                                                                                                                                                                                                                            |                                                                                                                                                                                  |                                                                                                                                                                                      |
|----------|-------------------------------------------|-----------------|--------------------------------------------------------------------------------------------------------------------------------------------------------------------------------------------------------------------------------------------------------------------------------------------------------------------------------------------------------------------------------------------|----------------------------------------------------------------------------------------------------------------------------------------------------------------------------------|--------------------------------------------------------------------------------------------------------------------------------------------------------------------------------------|
| <b>B</b> | Taking crops<br>to the market<br>(or not) | <b>WE5bb_01</b> | <p><i>“There is no alternative to how much or how little of her crops [PERSON’S NAME] can take to the market. She is taking the only possible amount.”</i></p> <p>Are you like this person?</p> <p>Yes ..... 1<br/>No ..... 2 → Question 3</p> <p style="text-align: right;"><input type="text"/></p>                                                                                      | <p>Are you completely the same or somewhat the same?</p> <p>Completely the same ..... 1<br/>Somewhat the same ..... 2</p> <p style="text-align: right;"><input type="text"/></p> | <p>Are you completely different or somewhat different?</p> <p>Completely different ..... 1<br/>Somewhat different ..... 2</p> <p style="text-align: right;"><input type="text"/></p> |
|          |                                           | <b>WE5bb_02</b> | <p><i>“[PERSON’S NAME] takes crops to the market because her spouse, or another person or group in her community tells her she must sell them there. She does what they tell her to do.”</i></p> <p>Are you like this person?</p> <p>Yes ..... 1<br/>No ..... 2 → Question 3</p> <p style="text-align: right;"><input type="text"/></p>                                                    | <p>Are you completely the same or somewhat the same?</p> <p>Completely the same ..... 1<br/>Somewhat the same ..... 2</p> <p style="text-align: right;"><input type="text"/></p> | <p>Are you completely different or somewhat different?</p> <p>Completely different ..... 1<br/>Somewhat different ..... 2</p> <p style="text-align: right;"><input type="text"/></p> |
|          |                                           | <b>WE5bb_03</b> | <p><i>“[PERSON’S NAME] takes the crops to the market that her family or community expect. She wants them to approve of her as a good business woman.”</i></p> <p>Are you like this person?</p> <p>Yes ..... 1<br/>No ..... 2 → Question 3</p> <p style="text-align: right;"><input type="text"/></p>                                                                                       | <p>Are you completely the same or somewhat the same?</p> <p>Completely the same ..... 1<br/>Somewhat the same ..... 2</p> <p style="text-align: right;"><input type="text"/></p> | <p>Are you completely different or somewhat different?</p> <p>Completely different ..... 1<br/>Somewhat different ..... 2</p> <p style="text-align: right;"><input type="text"/></p> |
|          |                                           | <b>WE5bb_04</b> | <p><i>“[PERSON’S NAME] chooses to take the crops to market that she personally wants to sell there, and thinks is best for her family and business. She values this approach to sales. If she changed her mind, she could act differently.”</i></p> <p>Are you like this person?</p> <p>Yes ..... 1<br/>No ..... 2 → Question 3</p> <p style="text-align: right;"><input type="text"/></p> | <p>Are you completely the same or somewhat the same?</p> <p>Completely the same ..... 1<br/>Somewhat the same ..... 2</p> <p style="text-align: right;"><input type="text"/></p> | <p>Are you completely different or somewhat different?</p> <p>Completely different ..... 1<br/>Somewhat different ..... 2</p> <p style="text-align: right;"><input type="text"/></p> |

Household Number:

|   |                   |                 |                                                                                                                                                                                                                                                                                                                                                                               |                                                                                                                                                                                  |                                                                                                                                                                                      |
|---|-------------------|-----------------|-------------------------------------------------------------------------------------------------------------------------------------------------------------------------------------------------------------------------------------------------------------------------------------------------------------------------------------------------------------------------------|----------------------------------------------------------------------------------------------------------------------------------------------------------------------------------|--------------------------------------------------------------------------------------------------------------------------------------------------------------------------------------|
| C | Livestock raising | <b>WE5bc_01</b> | <p><i>“[PERSON’S NAME] can’t raise any livestock other than what she has. These are all that’s available.”</i></p> <p>Are you like this person?</p> <p>Yes ..... 1<br/>No ..... 2 → Question 3</p> <p style="text-align: right;"><input type="text"/></p>                                                                                                                     | <p>Are you completely the same or somewhat the same?</p> <p>Completely the same ..... 1<br/>Somewhat the same ..... 2</p> <p style="text-align: right;"><input type="text"/></p> | <p>Are you completely different or somewhat different?</p> <p>Completely different ..... 1<br/>Somewhat different ..... 2</p> <p style="text-align: right;"><input type="text"/></p> |
|   |                   | <b>WE5bc_02</b> | <p><i>“[PERSON’S NAME] raises the types of livestock she does because her spouse, or another person or group in her community tell her she must use these breeds. She does what they tell her to do.”</i></p> <p>Are you like this person?</p> <p>Yes ..... 1<br/>No ..... 2 → Question 3</p> <p style="text-align: right;"><input type="text"/></p>                          | <p>Are you completely the same or somewhat the same?</p> <p>Completely the same ..... 1<br/>Somewhat the same ..... 2</p> <p style="text-align: right;"><input type="text"/></p> | <p>Are you completely different or somewhat different?</p> <p>Completely different ..... 1<br/>Somewhat different ..... 2</p> <p style="text-align: right;"><input type="text"/></p> |
|   |                   | <b>WE5bc_03</b> | <p><i>“[PERSON’S NAME] buys the kinds of livestock that her family or community expect. She wants them to approve of her as a good livestock raiser.”</i></p> <p>Are you like this person?</p> <p>Yes ..... 1<br/>No ..... 2 → Question 3</p> <p style="text-align: right;"><input type="text"/></p>                                                                          | <p>Are you completely the same or somewhat the same?</p> <p>Completely the same ..... 1<br/>Somewhat the same ..... 2</p> <p style="text-align: right;"><input type="text"/></p> | <p>Are you completely different or somewhat different?</p> <p>Completely different ..... 1<br/>Somewhat different ..... 2</p> <p style="text-align: right;"><input type="text"/></p> |
|   |                   | <b>WE5bc_04</b> | <p><i>“[PERSON’S NAME] chooses the types of livestock that she personally wants to raise and thinks are good for her family and business. She values raising these types. If she changed her mind, she could act differently.”</i></p> <p>Are you like this person?</p> <p>Yes ..... 1<br/>No ..... 2 → Question 3</p> <p style="text-align: right;"><input type="text"/></p> | <p>Are you completely the same or somewhat the same?</p> <p>Completely the same ..... 1<br/>Somewhat the same ..... 2</p> <p style="text-align: right;"><input type="text"/></p> | <p>Are you completely different or somewhat different?</p> <p>Completely different ..... 1<br/>Somewhat different ..... 2</p> <p style="text-align: right;"><input type="text"/></p> |

Household Number:

**Module WE5c: Decision making (Male and Female)**

| Serial no.                                                                                                                | <i>ENUMERATOR:</i> This is the last set of questions and it is very important. I am going to give you some reasons for why you might undertake activities in the domains I just mentioned. You might have several reasons for doing each one and there is no right or wrong answer. Please tell me how true it would be to say: | Your actions with respect to [DOMAIN] are motivated by a desire to avoid punishment or gain reward?<br>Can you tell me whether it is entirely true, somewhat true, not very true or never true?<br><br>[READ OPTIONS]<br><b>CODE 1↓</b> | Your actions with respect to [DOMAIN] are motivated by a desire to avoid blame or so that other people speak well of you?<br>Can you tell me whether it is entirely true, somewhat true, not very true or never true?<br><br>[READ OPTIONS]<br><b>CODE 1↓</b> | Your actions with respect to [DOMAIN] are motivated by and reflect your own values and/or interests?<br>Can you tell me whether it is entirely true, somewhat true, not very true or never true?<br><br>[READ OPTIONS]<br><b>CODE 1↓</b> | How satisfied were you with the decisions made in [DOMAIN]?<br><br>[READ OPTIONS]<br><b>CODE 2↓</b> |
|---------------------------------------------------------------------------------------------------------------------------|---------------------------------------------------------------------------------------------------------------------------------------------------------------------------------------------------------------------------------------------------------------------------------------------------------------------------------|-----------------------------------------------------------------------------------------------------------------------------------------------------------------------------------------------------------------------------------------|---------------------------------------------------------------------------------------------------------------------------------------------------------------------------------------------------------------------------------------------------------------|------------------------------------------------------------------------------------------------------------------------------------------------------------------------------------------------------------------------------------------|-----------------------------------------------------------------------------------------------------|
|                                                                                                                           |                                                                                                                                                                                                                                                                                                                                 | <b>WE5c_03</b>                                                                                                                                                                                                                          | <b>WE5c_04</b>                                                                                                                                                                                                                                                | <b>WE5c_05</b>                                                                                                                                                                                                                           | <b>WE5c_06</b>                                                                                      |
| <b>A</b>                                                                                                                  | Nonfarm business activity?                                                                                                                                                                                                                                                                                                      | <input type="text"/>                                                                                                                                                                                                                    | <input type="text"/>                                                                                                                                                                                                                                          | <input type="text"/>                                                                                                                                                                                                                     | <input type="text"/>                                                                                |
| <b>B</b>                                                                                                                  | Your own wage or salary employment?                                                                                                                                                                                                                                                                                             | <input type="text"/>                                                                                                                                                                                                                    | <input type="text"/>                                                                                                                                                                                                                                          | <input type="text"/>                                                                                                                                                                                                                     | <input type="text"/>                                                                                |
| <b>C</b>                                                                                                                  | Minor household expenditures?                                                                                                                                                                                                                                                                                                   | <input type="text"/>                                                                                                                                                                                                                    | <input type="text"/>                                                                                                                                                                                                                                          | <input type="text"/>                                                                                                                                                                                                                     | <input type="text"/>                                                                                |
| <b>D</b>                                                                                                                  | What to do if you have a serious health problem?                                                                                                                                                                                                                                                                                | <input type="text"/>                                                                                                                                                                                                                    | <input type="text"/>                                                                                                                                                                                                                                          | <input type="text"/>                                                                                                                                                                                                                     | <input type="text"/>                                                                                |
| <b>E</b>                                                                                                                  | How to protect yourself from violence?                                                                                                                                                                                                                                                                                          | <input type="text"/>                                                                                                                                                                                                                    | <input type="text"/>                                                                                                                                                                                                                                          | <input type="text"/>                                                                                                                                                                                                                     | <input type="text"/>                                                                                |
| <b>F</b>                                                                                                                  | Whether and how to express religious faith?                                                                                                                                                                                                                                                                                     | <input type="text"/>                                                                                                                                                                                                                    | <input type="text"/>                                                                                                                                                                                                                                          | <input type="text"/>                                                                                                                                                                                                                     | <input type="text"/>                                                                                |
| <b>G</b>                                                                                                                  | What kind of tasks you will do on a particular day?                                                                                                                                                                                                                                                                             | <input type="text"/>                                                                                                                                                                                                                    | <input type="text"/>                                                                                                                                                                                                                                          | <input type="text"/>                                                                                                                                                                                                                     | <input type="text"/>                                                                                |
| <b>H</b>                                                                                                                  | Whether or not to use family planning to space or limit births?                                                                                                                                                                                                                                                                 | <input type="text"/>                                                                                                                                                                                                                    | <input type="text"/>                                                                                                                                                                                                                                          | <input type="text"/>                                                                                                                                                                                                                     | <input type="text"/>                                                                                |
| <b>CODE 1: Motivation for activity</b>                                                                                    |                                                                                                                                                                                                                                                                                                                                 | <b>CODE 2: Extent of satisfaction with activity</b>                                                                                                                                                                                     |                                                                                                                                                                                                                                                               |                                                                                                                                                                                                                                          |                                                                                                     |
| Always true ..... 1<br>Somewhat true ..... 2<br>Not very true ..... 3<br>Never true ..... 4<br>Decision not made ..... 98 |                                                                                                                                                                                                                                                                                                                                 | Very satisfied ..... 1<br>Somewhat satisfied ..... 2<br>Neither satisfied nor dissatisfied ..... 3<br>Somewhat dissatisfied ..... 4<br>Very dissatisfied ..... 5<br>Decision not made ..... 98                                          |                                                                                                                                                                                                                                                               |                                                                                                                                                                                                                                          |                                                                                                     |





Household Number:

**Module WE6b: Satisfaction with Time Allocation (Male and Female)**

| Q. NO.  | QUESTION                                                            | RESPONSE | RESPONSE CODE                                                                       |
|---------|---------------------------------------------------------------------|----------|-------------------------------------------------------------------------------------|
| WE6.01b | In the last 24 hours, did you work (at home or outside of the home) |          | More than usual..... 1<br>About the same as usual..... 2<br>Less than usual ..... 3 |

| Q. No.  | Question                                                                                                                                                                                                                                                                                                                                                          | Response             | Response options/Instructions                                                                                                                                                                                                               |
|---------|-------------------------------------------------------------------------------------------------------------------------------------------------------------------------------------------------------------------------------------------------------------------------------------------------------------------------------------------------------------------|----------------------|---------------------------------------------------------------------------------------------------------------------------------------------------------------------------------------------------------------------------------------------|
| WE6_02  | Was yesterday a holiday or nonworking day?                                                                                                                                                                                                                                                                                                                        | <input type="text"/> | Yes..... 1<br>No ..... 2                                                                                                                                                                                                                    |
| WE6_03  | Regarding the amount of sleep you got last night, was that [READ RESPONSES]::                                                                                                                                                                                                                                                                                     | <input type="text"/> | Less than average ..... 1<br>Average ..... 2<br>More than average ..... 3                                                                                                                                                                   |
| WE6_04  | <i>READ:</i> I am going to ask you a series of questions and I want you to tell me how you would rate your satisfaction on a scale of 1 to 10, where 1 means you are not satisfied and 10 means you are very satisfied. If you are neither satisfied or dissatisfied this would be in the middle or 5 on the scale.<br>How would you rate your satisfaction with: |                      |                                                                                                                                                                                                                                             |
| WE6_04A | The distribution of work duties within your household?                                                                                                                                                                                                                                                                                                            | <input type="text"/> | <p><b>Please mark on a scale from 1 – 10</b></p> <p>Not satisfied ☹..... 1</p> <p style="text-align: center;">↓</p> <p>Neither satisfied nor dissatisfied ☹..... 5</p> <p style="text-align: center;">↓</p> <p>Very satisfied ☺..... 10</p> |
| WE6_04B | Your available time for leisure activities like watching TV, listening to radio, seeing movies or doing sports?                                                                                                                                                                                                                                                   | <input type="text"/> |                                                                                                                                                                                                                                             |
| WE6_04C | Your contacts with friends or relatives?                                                                                                                                                                                                                                                                                                                          | <input type="text"/> |                                                                                                                                                                                                                                             |
| WE6_04D | Your possibilities of going to other places outside your village?                                                                                                                                                                                                                                                                                                 | <input type="text"/> |                                                                                                                                                                                                                                             |
| WE6_04E | Your power to make important decisions that change the course of your life?                                                                                                                                                                                                                                                                                       | <input type="text"/> |                                                                                                                                                                                                                                             |
| WE6_04F | Your satisfaction with your life overall?                                                                                                                                                                                                                                                                                                                         | <input type="text"/> |                                                                                                                                                                                                                                             |
| WE6_05  | During the last four weeks, how many days of your primary daily activities did you miss because of poor health?                                                                                                                                                                                                                                                   | <input type="text"/> | Enter number of days [1-28]                                                                                                                                                                                                                 |
| WE6_06  | Were the last four weeks typical or average?                                                                                                                                                                                                                                                                                                                      | <input type="text"/> | Worse than average ..... 1<br>Average ..... 2<br>Better than average ..... 3                                                                                                                                                                |
| WE6_07  | Were you unable to complete normal activities in the last 24 hours?                                                                                                                                                                                                                                                                                               | <input type="text"/> | Yes..... 1<br>No ..... 2                                                                                                                                                                                                                    |

Household Number:

| Q. No.                                                                                                   | Question                                            | Response                                                                                                                                                                                          | Response options/Instructions      |          |          |                      |                      |                      |                                                                                                                                                                                                                                                                                                |
|----------------------------------------------------------------------------------------------------------|-----------------------------------------------------|---------------------------------------------------------------------------------------------------------------------------------------------------------------------------------------------------|------------------------------------|----------|----------|----------------------|----------------------|----------------------|------------------------------------------------------------------------------------------------------------------------------------------------------------------------------------------------------------------------------------------------------------------------------------------------|
| WE6_08                                                                                                   | Do you suffer from a chronic disability?            | <input type="text"/>                                                                                                                                                                              | Yes..... 1<br>No ..... 2 >> WE6_10 |          |          |                      |                      |                      |                                                                                                                                                                                                                                                                                                |
| WE6_09                                                                                                   | If yes, what kind?<br><br>[ALLOW UP TO 3 RESPONSES] | <table border="1"> <tr> <td>WE6_09_a</td> <td>WE6_09_b</td> <td>WE6_09_c</td> </tr> <tr> <td><input type="text"/></td> <td><input type="text"/></td> <td><input type="text"/></td> </tr> </table> | WE6_09_a                           | WE6_09_b | WE6_09_c | <input type="text"/> | <input type="text"/> | <input type="text"/> | Deaf or hearing disability..... 1<br>Mobility or missing limbs..... 2<br>Speech or language disability..... 3<br>Learning or mental impairment..... 4<br>Blind or visual disability..... 5<br>Chronic health or disease ..... 6<br>Psychological or emotional ..... 7<br>Other, specify..... 8 |
| WE6_09_a                                                                                                 | WE6_09_b                                            | WE6_09_c                                                                                                                                                                                          |                                    |          |          |                      |                      |                      |                                                                                                                                                                                                                                                                                                |
| <input type="text"/>                                                                                     | <input type="text"/>                                | <input type="text"/>                                                                                                                                                                              |                                    |          |          |                      |                      |                      |                                                                                                                                                                                                                                                                                                |
| <b>ENUMERATOR: If male, stop and proceed to Module WE6_12; If female, continue from question WE6_10:</b> |                                                     |                                                                                                                                                                                                   |                                    |          |          |                      |                      |                      |                                                                                                                                                                                                                                                                                                |
| WE6_10                                                                                                   | Are you currently pregnant?                         | <input type="text"/>                                                                                                                                                                              | Yes..... 1<br>No ..... 2           |          |          |                      |                      |                      |                                                                                                                                                                                                                                                                                                |
| WE6_11                                                                                                   | Are you currently breastfeeding?                    | <input type="text"/>                                                                                                                                                                              | Yes..... 1<br>No ..... 2           |          |          |                      |                      |                      |                                                                                                                                                                                                                                                                                                |

**Module WE6b continued: Satisfaction with Time Allocation**

| Q. NO. | QUESTION                                                                                                                                                                                                                                                                                                                                                                                                                                                                                                                                                                                              | RESPONSE OPTIONS/INSTRUCTIONS                                         |
|--------|-------------------------------------------------------------------------------------------------------------------------------------------------------------------------------------------------------------------------------------------------------------------------------------------------------------------------------------------------------------------------------------------------------------------------------------------------------------------------------------------------------------------------------------------------------------------------------------------------------|-----------------------------------------------------------------------|
| WE6_12 | <p>Next, I am going to ask you a question about how satisfied you are with the time you have to yourself to do things you enjoy. Please give your opinion on a scale of 1 to 10. 1 means you are not satisfied and 10 means you are very satisfied. If you are neither satisfied nor dissatisfied, this would be in the middle, or 5, on the scale.</p> <p>NOTE: LEISURE EXAMPLES SHOULD BE MODIFIED FOR LOCAL CONTEXT.</p> <p>How satisfied are you with your available time for leisure activities like visiting neighbors, watching TV, listening to the radio, seeing movies or doing sports?</p> | <p>SATISFACTION RATING: <input type="text"/> <input type="text"/></p> |



Household Number:

**Module WE7b: Parent's information (Male and Female)**

| SL      | Questions                                                       | Answer               | Answer code                                                                                                                                                                                                                                                                                                                                                                                                                                                                                                                                                                                                                                                                                                                                                          |
|---------|-----------------------------------------------------------------|----------------------|----------------------------------------------------------------------------------------------------------------------------------------------------------------------------------------------------------------------------------------------------------------------------------------------------------------------------------------------------------------------------------------------------------------------------------------------------------------------------------------------------------------------------------------------------------------------------------------------------------------------------------------------------------------------------------------------------------------------------------------------------------------------|
| WE7b _1 | What's your (respondent's) mother's highest level of education? | <input type="text"/> | Never attended school ..... 99<br>Studying in Class I..... 0<br>Completed Class I..... 1<br>Completed Class II ..... 2<br>Completed Class III..... 3<br>Completed Class IV..... 4<br>Completed Class V ..... 5<br>Completed Class VI..... 6<br>Completed Class VII ..... 7<br>Completed Class VIII ..... 8<br>Completed Class IX..... 9<br>SSC/Dakhil..... 10<br>HSC/Alim..... 12<br>BA/BSC pass/fazil ..... 14<br>BA/BSC honorary/fazil ..... 15<br>MA/MSC and above/kamil ..... 16<br>SSC candidate ..... 22<br>HSC candidate..... 33<br>Any class below Class I ..... 66<br>Mosque related primary school ..67<br>Medical/MBBS ..... 71<br>Nursing ..... 72<br>Engineer ..... 73<br>Diploma Engineer ..... 74<br>Vocational Education ..... 75<br>Others ..... 76 |
| WE7b _2 | What's your (respondent) father's highest level of education?   | <input type="text"/> |                                                                                                                                                                                                                                                                                                                                                                                                                                                                                                                                                                                                                                                                                                                                                                      |
| WE7b _3 | Number of alive sisters (including respondent)                  | <input type="text"/> | Number of sisters                                                                                                                                                                                                                                                                                                                                                                                                                                                                                                                                                                                                                                                                                                                                                    |
| WE7b _4 | Number of alive brothers (including respondent)                 | <input type="text"/> | Number of brothers                                                                                                                                                                                                                                                                                                                                                                                                                                                                                                                                                                                                                                                                                                                                                   |
| WE7b _5 | Where were you born?                                            | <input type="text"/> | I am living where I was born ..... 1<br>In this village/ward ..... 2<br>In another village of this union/ward ..... 3<br>In another union of this station ..... 4<br>In another station of this district ..... 5<br>In another district of this division ..... 6<br>In another division (specify ..... 7                                                                                                                                                                                                                                                                                                                                                                                                                                                             |
| WE7b _6 | How often do you read newspapers/magazines?                     | <input type="text"/> | Everyday..... 1<br>Every week at least once..... 2<br>Every 2 weeks at least once ..... 3<br>Every month at least once ..... 4<br>Irregularly ..... 5<br>Hardly/almost never ..... 6>>WE7b_8                                                                                                                                                                                                                                                                                                                                                                                                                                                                                                                                                                         |
| WE7b _7 | Do you read any national or regional newspaper or magazine?     | <input type="text"/> | National ..... 1<br>Regional ..... 2<br>Both kinds ..... 3                                                                                                                                                                                                                                                                                                                                                                                                                                                                                                                                                                                                                                                                                                           |
| WE7b _8 | How often do you listen to the radio?                           | <input type="text"/> | Everyday..... 1<br>Every week at least once..... 2<br>Every 2 weeks at least once ..... 3<br>Every month at least once ..... 4<br>Irregularly ..... 5<br>Hardly/almost never ..... 6                                                                                                                                                                                                                                                                                                                                                                                                                                                                                                                                                                                 |

Household Number:

| SL      | Questions                                                                        | Answer                                                               | Answer code                                                                                                                                                                                                                                                                                                                                                                                                    |
|---------|----------------------------------------------------------------------------------|----------------------------------------------------------------------|----------------------------------------------------------------------------------------------------------------------------------------------------------------------------------------------------------------------------------------------------------------------------------------------------------------------------------------------------------------------------------------------------------------|
| WE7b_9  | How often do you watch television?                                               | <input type="text"/>                                                 | Everyday..... 1<br>Every week at least once..... 2<br>Every 2 weeks at least once ..... 3<br>Every month at least once ..... 4<br>Irregularly..... 5<br>Hardly/almost never ..... 6>>WE7b_11                                                                                                                                                                                                                   |
| WE7b_10 | Which channels do you watch often?                                               | <input type="text"/>                                                 | BTV ..... 1<br>BTV World..... 2<br>Other Local Chanel/Bangladeshi channel ..... 3<br>Foreign Bangla Channels..... 4<br>Foreign other channels..... 5                                                                                                                                                                                                                                                           |
| WE7b_11 | Do you have your own mobile phone?                                               | <input type="text"/>                                                 | Yes ..... 1<br>No..... 2                                                                                                                                                                                                                                                                                                                                                                                       |
| WE7b_12 | Do you use a mobile phone? (mobile phone could be his/her own or someone else's) | <input type="text"/>                                                 | Yes ..... 1<br>No..... 2                                                                                                                                                                                                                                                                                                                                                                                       |
| WE7b_13 | If yes, for what purpose do you use it?<br><br>(Mention the 3 main reasons)      | <input type="text"/><br><input type="text"/><br><input type="text"/> | Talking to friends and family..... 1<br>Financial Transactions (such as Bkash) ..... 2<br>Business purposes (such as contacting agriculture extension services or learning about market prices ..... 3<br>To access other kinds of information (such as health care, agriculture extension, services, other social services) ..... 4<br>Entertainment (music, videos) ..... 5<br>To listen to FM radio ..... 6 |
| WE7b_14 | Which operator do you use?<br><br>(Mention 2 main ones)                          | <input type="text"/><br><input type="text"/>                         | Grameen ..... 1<br>Rabi ..... 2<br>Banglalink ..... 3<br>Airtel ..... 4<br>Teletalk..... 5<br>Citycell ..... 6<br>Others (mention name) ..... 7                                                                                                                                                                                                                                                                |
| WE7b_15 | If you are married, than who chose your partner?                                 | <input type="text"/>                                                 | We chose each other ..... 1<br>I chose him/her and he/she agreed ..... 2<br>He/she chose me and I agreed ..... 3<br>He/she chose me but I did not agree ..... 4<br>The family chose and I agreed ..... 5<br>The family chose but I did not agree..... 6<br>Others (mention here) ..... 96                                                                                                                      |

Household Number:

**Module WE7c: Parda information (Male and Female)**

| SL     | Questions                                                                     | Answer                                                               | Answer code                                                                                                                                                                                                                                                                                                                                  |
|--------|-------------------------------------------------------------------------------|----------------------------------------------------------------------|----------------------------------------------------------------------------------------------------------------------------------------------------------------------------------------------------------------------------------------------------------------------------------------------------------------------------------------------|
| WE7c_1 | What is done to protect the women (both young and old) in your family?        | <input type="text"/><br><input type="text"/>                         | Providing a companion when they go out..... 1<br>Not allowing them to interact with close male relatives of similar age ..... 2<br>Not allowing them to go out in the evening ..... 3<br>Cover them with a burkha when going out. .... 4<br>Not allowing them to roam around here and there ..... 5<br>Others (please mention here) ..... 96 |
| WE7c_2 | Are the women (both young and old) required to cover the head when going out? | <input type="text"/>                                                 | Yes ..... 1<br>No..... 2>> End of questionnaire. Fill out question WA11 from module WA                                                                                                                                                                                                                                                       |
| WE7c_3 | What type of covering is used?                                                | <input type="text"/><br><input type="text"/><br><input type="text"/> | Burkha ..... 1<br>Scarf ..... 2<br>Cover the head with the saree ..... 3<br>Hijab/Nikab ..... 4<br>The veiling of the mind is enough ..... 5                                                                                                                                                                                                 |
| WE7c_4 | What is the reason for covering up?<br>(Multiple responses possible)          | <input type="text"/><br><input type="text"/><br><input type="text"/> | Safety ..... 1<br>Religious reasons..... 2<br>Societal reasons ..... 3<br>Instructions from the family ..... 4<br>Personal choice..... 5<br>Others (mention here)..... 96<br>Don't know..... 98                                                                                                                                              |
| WE7c_5 | From what age are the women in the household required to cover their head?    | <input type="text"/>                                                 | Age (complete years)                                                                                                                                                                                                                                                                                                                         |
| WE7c_6 | Do you cover your head when you go out of the house?                          | <input type="text"/>                                                 | Yes ..... 1<br>No..... 2                                                                                                                                                                                                                                                                                                                     |

Module End Time:  Hour   Minute
